# Supplementary material for: Rapid, effective deprotection of tert-butoxycarbonyl (Boc) amino acids and peptides at high temperatures using a thermally stable ionic liquid
Source: Royal Society of Chemistry journal article supplement (doi:10.1039/c5ra21279k), 2015-01-01

Electronic Supplementary Material (ESI) for RSC Adv.

*Supporting Information to*

**Rapid, effective deprotection of *tert*-butoxycarbonyl (Boc) amino acids and peptides at high temperatures using a thermally stable Ionic Liquid.**

Sumit S. Bhawal,<sup>a</sup> Rahul A. Patil<sup>a</sup> and Daniel W. Armstrong\*<sup>a</sup>

<sup>a</sup>*Department of Chemistry and Biochemistry, The University of Texas at Arlington, 700 Planetarium Place, Arlington, Texas 76019-0065, USA. E-mail: sec4dwa@uta.edu*

|                                        |        |
|----------------------------------------|--------|
| General.....                           | S2     |
| General Procedure for Experiments..... | S2     |
| NMR Spectra.....                       | S5-S90 |

**General:** Compounds were purchased in their purest commercial quality. All materials were used as obtained, unless and otherwise indicated. Column chromatography for recovery of Ionic Liquid was performed using silica gel (300-400 mesh) with Hexane/EtOAc as eluent.  $^1\text{H}$  NMR,  $^{13}\text{C}$  NMR,  $^{19}\text{F}$  NMR and  $^{31}\text{P}$  NMR experiments were performed on 500 MHz a JEOL Eclipse Plus 500 instrument. Chemical shifts were recorded with reference to residual solvent peaks ( $\text{D}_2\text{O}$  residue = 4.79 ppm,  $\text{CDCl}_3$  residue = 7.26 ppm). ESI Mass spectroscopy was performed with Thermo Finnigan LXQ linear Ion Trap mass spectrometer, when required.

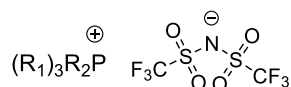

$\text{R}_1$  = Hexyl,  $\text{R}_2$  = Tetradecyl

Trihexyl tetradecyl phosphonium  
bis(trifluoromethane)sulfonimide  
(TTP.NTf<sub>2</sub>)

## General Procedures for Experiments

**Preparation of TTP-NTf<sub>2</sub>:** To a solution of (40 g, 77 mmol) trihexyl tetradecylphosphonium chloride, (graciously donated by CYTEC, West Paterson, NJ, USA) in methanol (20 mL) was added (24.32 g, 84.71 mmol) LiNTf<sub>2</sub>. Additional methanol was added to obtain a clear solution. The solution was slightly warm at the beginning and was stirred overnight. Methanol was removed under reduced pressure and ~200 mL  $\text{CH}_2\text{Cl}_2$  was added to the round bottom flask. The organic layer containing the ionic liquid was transferred to the separating funnel and LiCl was extracted with (3x100 mL) deionized water. The organic layer was concentrated under reduced pressure and dried in vacuum oven (maintained at 40 °C) over  $\text{P}_2\text{O}_5$  for at least 36 h before use. The products were characterized by  $^1\text{H}$  NMR,  $^{13}\text{C}$  NMR,  $^{19}\text{F}$  and  $^{31}\text{P}$  NMR.

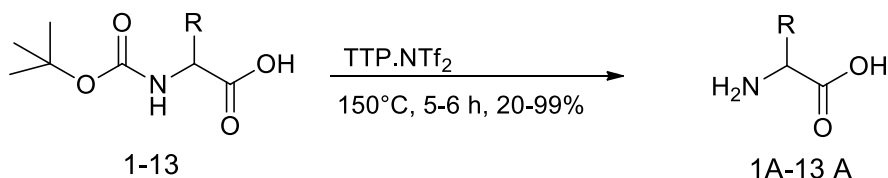

**R** = H, Me, *i*Pr, iso-Bu, *s*-Bu, Bzl, pyrrolidine, thiomethylethyl, 1-hydroxyethyl, 3-(1H-imidazol-4-yl), 4-amino-butyl, carboxymethyl, carboxyethyl.

**Method A (Neat Reaction in TTP-NTf<sub>2</sub>)** A mixture of (0.25 g, 0.32-1.43 mmol) N-Boc protected amino acid/peptides and TTP-NTf<sub>2</sub> (7 g, 9.16 mmol) was stirred (~150 rpm) for 5-6 h at 150 °C in a round bottom flask (50 mL) equipped with a reflux condenser. Completion of reaction was monitored by TLC using ethyl acetate/methanol (95:5) and ninhydrin as staining agent. On cooling, the reaction mixture was

transferred into separating funnel with 3x10 mL ( $\text{CH}_2\text{Cl}_2$ /water 1:1). In addition,  $\text{CH}_2\text{Cl}_2$  (100 mL) and water (50 – 80 mL, depending on the substrate) was added to the separating funnel. The layers were allowed to separate after shaking and the organic layer (containing the ionic liquid) was removed. To the aqueous layer (containing the amino acids) fresh  $\text{CH}_2\text{Cl}_2$  (2x 75mL) was added to ensure removal of any trace of ionic liquid remaining. The aqueous layer was evaporated to dryness to obtain the product. In most of the cases, this gave us the purified amino acid, but otherwise a final washing with ~ 5 mL isopropanol (using centrifuge) proved very effective. All the products were characterized by  $^1\text{H}$  NMR,  $^{13}\text{C}$  NMR. ESI-MS was done in some cases.

The peptides were added to TTP-NTf<sub>2</sub> and heated at 120 °C for 3 h (Scheme not shown). However, incomplete conversions and product decompositions were observed (14A-16A).

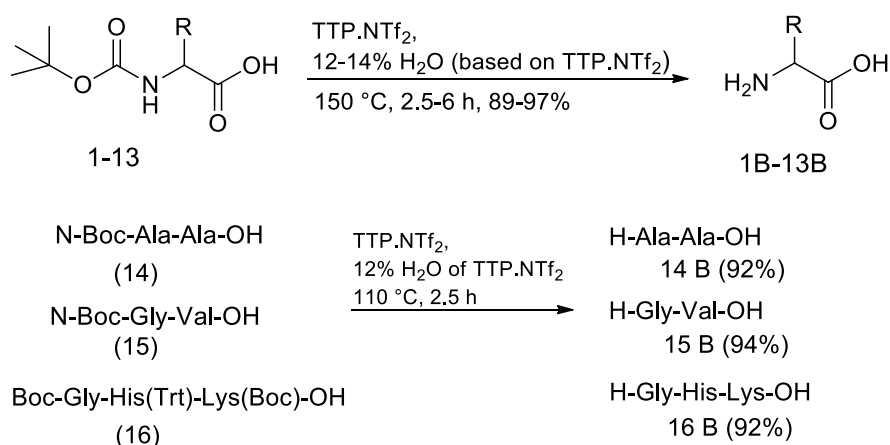

**Method B (TTP-NTf<sub>2</sub> and water)** To a mixture of (0.25 g, 0.32-1.43 mmol) N-Boc protected amino acid/peptides and TTP-NTf<sub>2</sub> (7 g, 9.16 mmol) was added deionized water 12-14% (based on TTP-NTf<sub>2</sub>). The resulting mixture was stirred (~200 rpm) for 2.5-6 h at 150 °C (for amino acids) and 2.5 h at 110 °C (for peptides). The remaining work-up is similar to method A. All the products were characterized by  $^1\text{H}$  NMR,  $^{13}\text{C}$  NMR. ESI-MS was done in some cases.

L-Histidine and L-Lysine tends to form emulsions especially for method B. They were centrifuged for 5 min at around 5000 rpm (The Drucker Co., Model 614 B) to obtain the purified compound. For peptides, the water was generally removed at ~ 40-45 °C under reduced pressure.

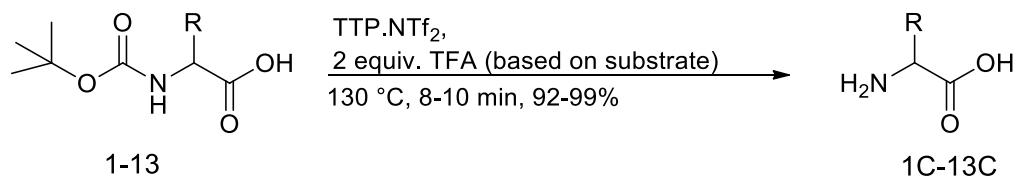

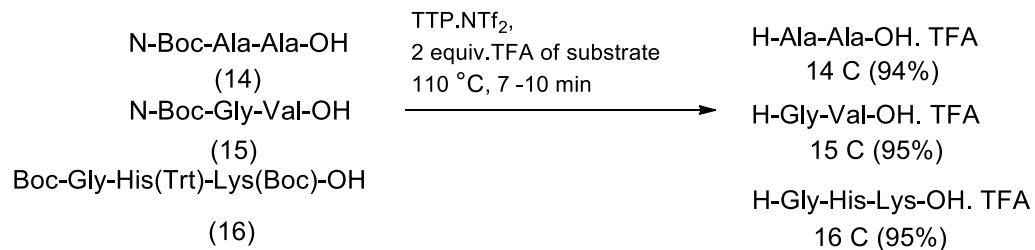

**Method C (TTP-NTf<sub>2</sub> and TFA)** To a stirring mixture of (0.25 g, 0.32-1.43 mmol) N-Boc protected amino acid/peptides and TTP-NTf<sub>2</sub> (7 g, 9.16 mmol) was added TFA (2 equiv, based on substrate). The resulting mixture was stirred (~150 rpm) for 7-10 min at 100 °C (for peptides) and 130 °C (for amino acids). The remaining procedure is similar to method A.

For peptides, the water was removed by either freeze drying or simply air drying at higher flow using an inverted funnel at room temperature. All the products were characterized by <sup>1</sup>H NMR, <sup>13</sup>C NMR. ESI-MS was done in some cases.

TTP-NTf<sub>2</sub>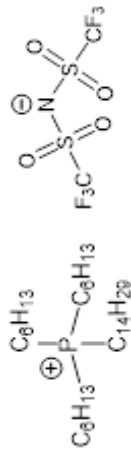TTP-NTf<sub>2</sub>

Trihexyl tetradecyl phosphonium  
bis(trifluoromethane)sulfonimide

4.02

1.52

1

2.0

abundance

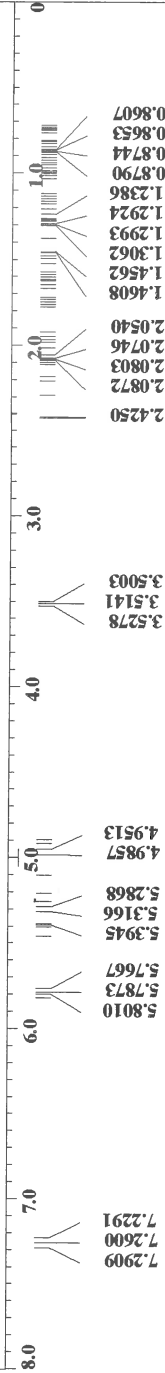

X : parts per Million : 1H

Filename = SBIL16H-3.jpf  
 Author = delta  
 Experiment = single\_pulse.ex2  
 Sample\_id = S#326644  
 Solvent = CHLOROFORM-D  
 Creation\_time = 27-SEP-2015 21:53:23  
 Revision\_time = 27-SEP-2015 09:19:40  
 Current\_time = 27-SEP-2015 09:20:21  
 Comment = single\_pulse  
 Data\_format = 1D COMPLEX  
 Dim\_size = 13107  
 Dim\_title = 1H  
 Dim\_units = [ppm]  
 Dimensions = X  
 Site = ECA 500  
 Spectrometer = JNM-ECA500  
 Field\_strength = 11.74737579[T] (500[MH  
 X\_acq\_duration = 1.74587904[s]  
 X\_domain = 1H  
 X\_freq = 500.15991521[MHz]  
 X\_offset = 5.0[ppm]  
 X\_points = 16384  
 X\_prescans = 0  
 X\_resolution = 0.57277737[Hz]  
 X\_sweep = 9.38438438[kHz]  
 Irr\_domain = 1H  
 Irr\_freq = 500.15991521[MHz]  
 Irr\_offset = 5.0[ppm]  
 Tri\_domain = 1H  
 Tri\_freq = 500.15991521[MHz]  
 Tri\_offset = 5.0[ppm]  
 Clipped = FALSE  
 Mod\_return = 1  
 Scans = 16  
 Total\_scans = 16  
 X\_90\_width = 12.54[us]  
 X\_acq\_time = 1.74587904[s]  
 X\_angle = 45[deg]  
 X\_atn = 4[dB]  
 X\_pulse = 6.27[us]  
 Irr\_mode = Off  
 Tri\_mode = Off  
 Dante\_presat = FALSE  
 Initial\_wait = 1[s]  
 Recvr\_gain = 22  
 Relaxation\_delay = 10[s]  
 Repetition\_time = 11.74587904[s]  
 Temp\_get = 21.5[dC]

TTP-NTf<sub>2</sub>\_carbon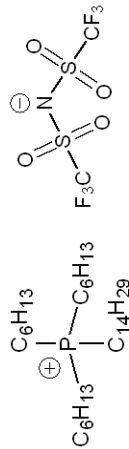TTP-NTf<sub>2</sub>

Trihexyl tetradecyl phosphonium  
bis(trifluoromethane)sulfonimide

Filename = SBIL16C-2.jdf  
 Author = delta  
 Experiment = single pulse\_dec  
 Sample\_id = S#329880  
 Solvent = CHLOROFORM-D  
 Creation\_time = 27-SEP-2015 22:20:40  
 Revision\_time = 27-SEP-2015 09:37:53  
 Current\_time = 27-SEP-2015 09:38:36  
 Comment = single pulse decouple  
 Data\_format = 1D COMPLEX  
 Dim\_size = 26214  
 Dim\_title = 13C  
 Dim\_units = [ppm]  
 Dimensions = X  
 Site = ECA 500  
 Spectrometer = JNM-ECA500  
 Field\_strength = 11.7473579[T] (500[MH  
 X\_acq\_duration = 0.83361792[s]  
 X\_domain = 13C  
 X\_freq = 125.76529768[MHz]  
 X\_offset = 100[ppm]  
 X\_points = 32768  
 X\_prescans = 4  
 X\_resolution = 1.19959034[Hz]  
 X\_sweep = 39.3081761[kHz]  
 Irr\_domain = 1K  
 Irr\_freq = 500.15991521[MHz]  
 Irr\_offset = 5.0[ppm]  
 Clipped = FALSE  
 Mod\_return = 10  
 Scans = 1280  
 Total\_scans = 1280  
 X\_90\_width = 10.73[us]  
 X\_acq\_time = 0.83361792[s]  
 X\_angle = 30[deg]  
 X\_atn = 9[db]  
 X\_pulse = 3.57666667[us]  
 Irr\_atn\_dec = 20[db]  
 Irr\_atn\_noe = 20[db]  
 Irr\_noise = WALTZ  
 Decoupling = TRUE  
 Initial\_wait = 1[s]  
 Noe = TRUE  
 Noe\_time = 0.4[s]  
 Recvr\_gain = 50  
 Relaxation\_delay = 0.4[s]  
 Repetition\_time = 1.23361792[s]  
 Temp\_get = 22.1[dc]

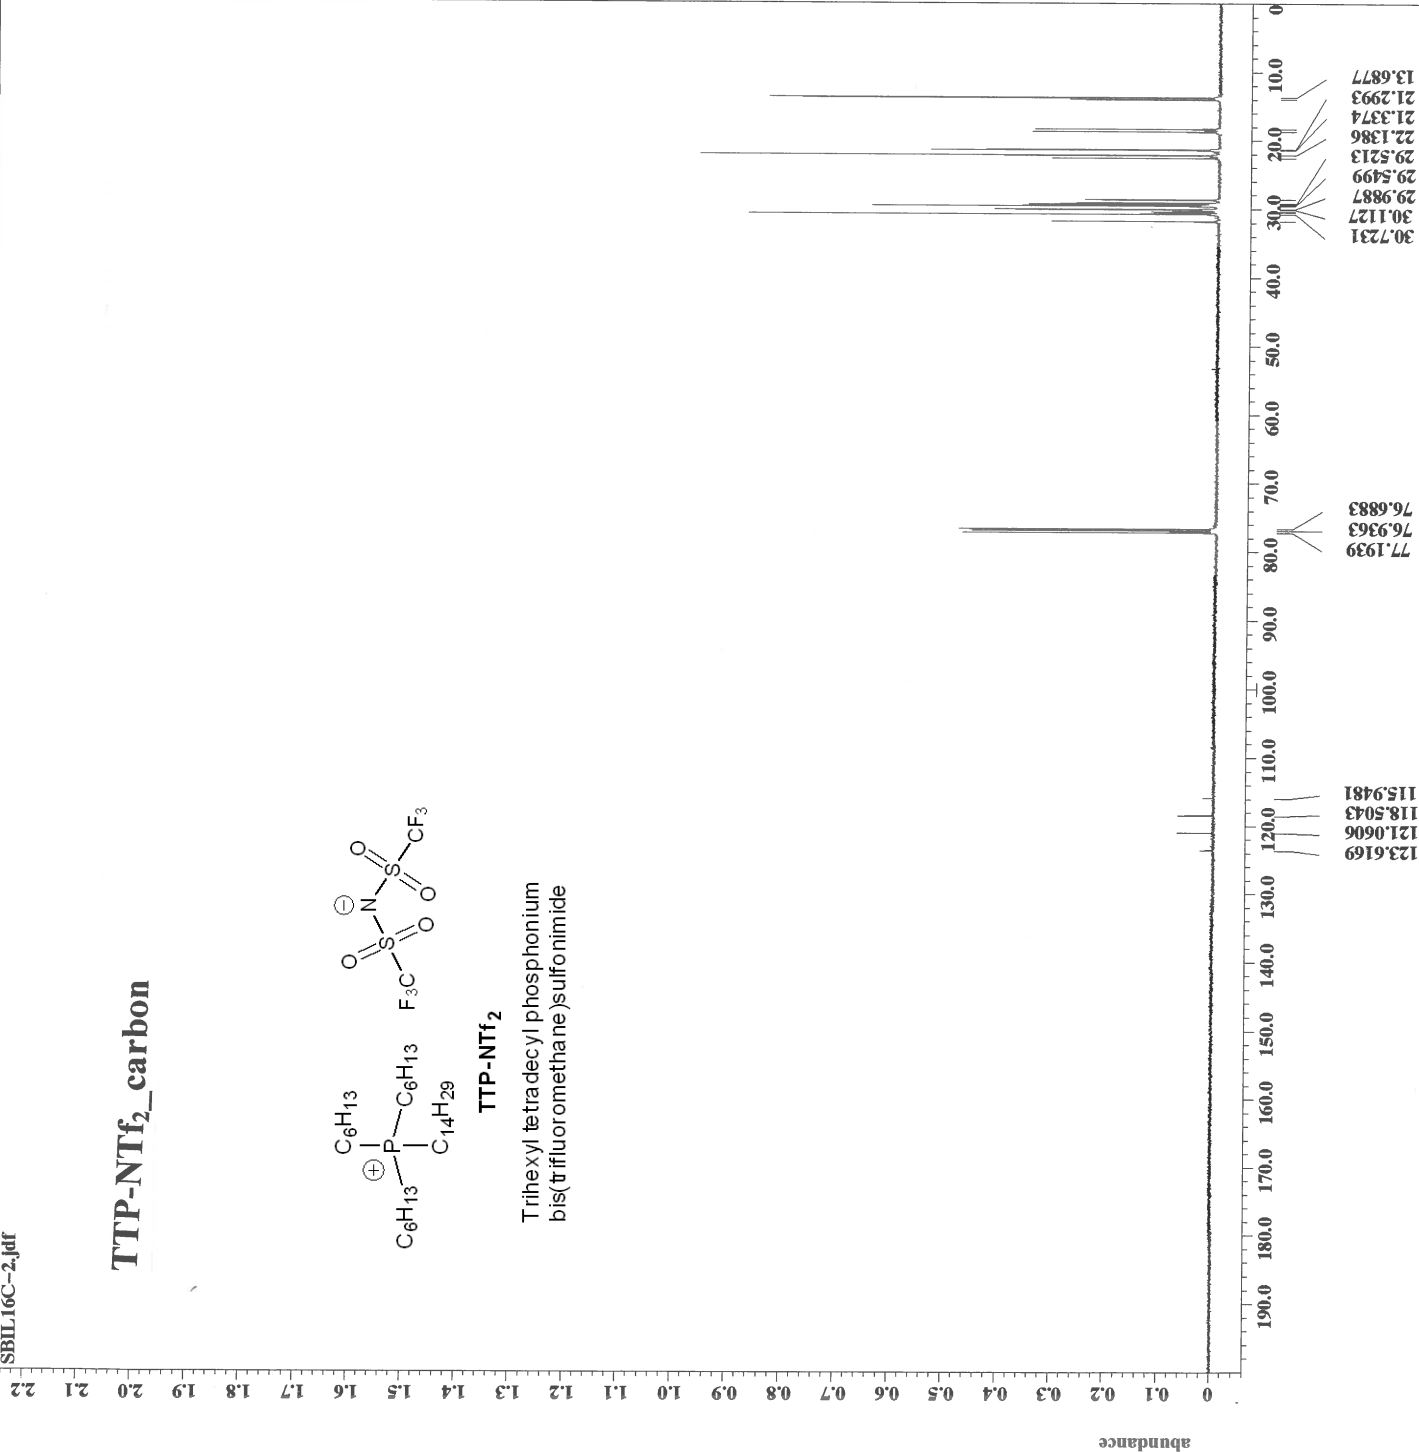

TTP-NTf<sub>2</sub>-<sup>31</sup>P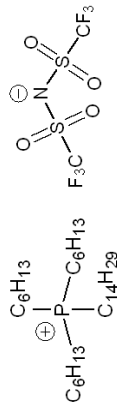TTP-NTf<sub>2</sub>

Trihexyl tetradecyl phosphonium  
bis(trifluoromethane)sulfonimide

Filename = SBIL16P-3.jdf  
 Author = delta  
 Experiment = single\_pulse.ex2  
 Sample\_id = S#349309  
 Solvent = CHLOROFORM-D  
 Creation\_time = 27-SEP-2015 22:29:08  
 Revision\_time = 27-SEP-2015 09:45:47  
 Current\_time = 27-SEP-2015 09:45:48  
 Comment = single\_pulse  
 Data\_format = 1D COMPLEX  
 Dim\_size = 13107  
 Dim\_title = 31P  
 Dim\_units = [ppm]  
 Dimensions = X  
 Site = ECA 500  
 Spectrometer = JNM-ECA500  
 Field\_strength = 11.7473579[T] (500[MH  
 X\_acq\_duration = 91.7504[ms]  
 X\_domain = 31P  
 X\_freq = 202.46831075[MHz]  
 X\_offset = 0[ppm]  
 X\_points = 16384  
 X\_prescans = 0  
 X\_resolution = 10.89913504[Hz]  
 X\_sweep = 178.57142857[kHz]  
 Irr\_domain = 31P  
 Irr\_freq = 202.46831075[MHz]  
 Irr\_offset = 5[ppm]  
 Tri\_domain = 31P  
 Tri\_freq = 202.46831075[MHz]  
 Tri\_offset = 5[ppm]  
 Clipped = FALSE  
 Mod\_return = 1  
 Scans = 9  
 Total\_scans = 9  
 X\_90\_width = 11.9[us]  
 X\_acq\_time = 91.7504[ms]  
 X\_angle = 45[deg]  
 X\_atn = 9[dB]  
 X\_pulse = 5.95[us]  
 Irr\_mode = Off  
 Tri\_mode = Off  
 Dante\_presat = FALSE  
 Initial\_wait = 1[s]  
 Recvr\_gain = 50  
 Relaxation\_delay = 10[s]  
 Repetition\_time = 10.0917504[s]  
 Temp\_get = 21.6[dC]

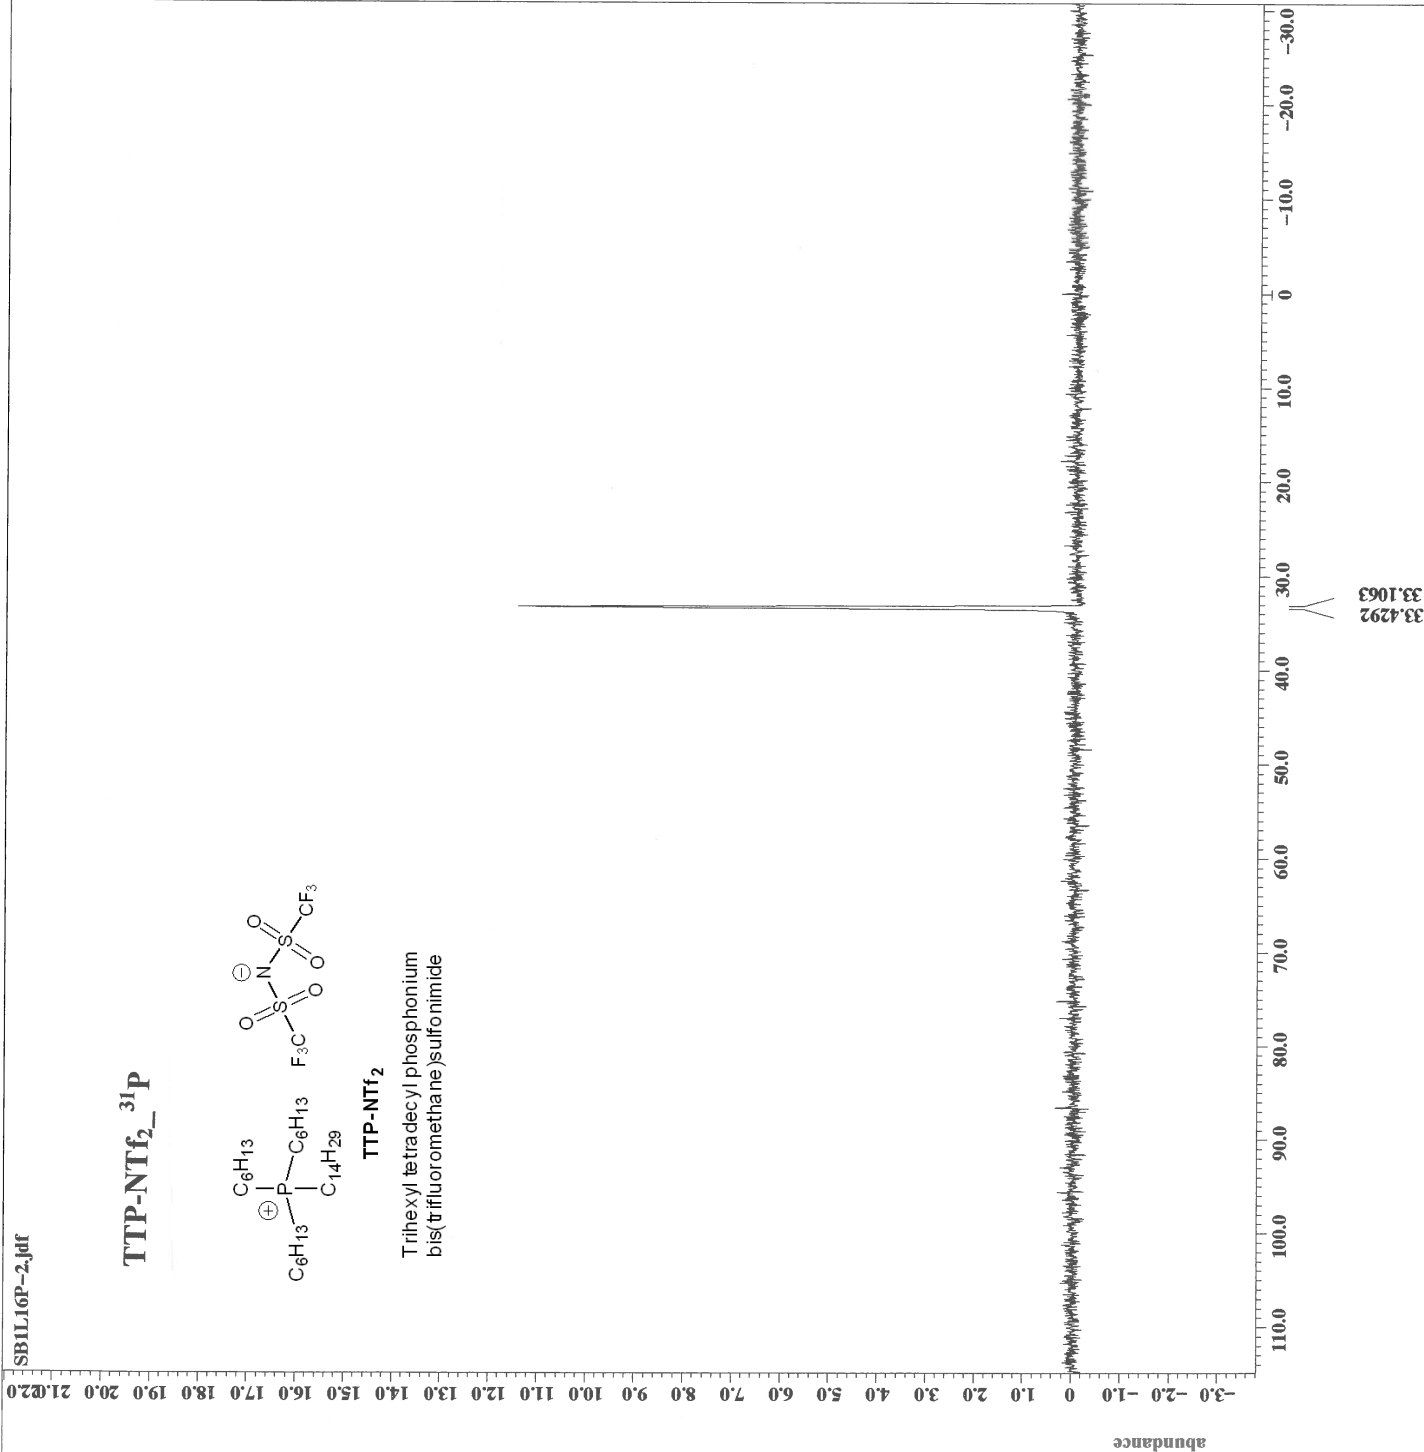

TTP-NTf2<sup>19</sup>F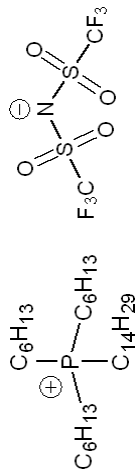TTP-NTf<sub>2</sub>

Trihexyl tetradecyl phosphonium  
bis(trifluoromethane)sulfonimide

Filename = SBIL16-3.jdf  
 Author = delta  
 Experiment = single\_pulse.ex2  
 Sample\_id = S#346613  
 Solvent = CHLOROFORM-D  
 Creation\_time = 27-SEP-2015 22:24:59  
 Revision\_time = 27-SEP-2015 09:41:05  
 Current\_time = 27-SEP-2015 09:41:32  
 Comment = single\_pulse  
 Data\_format = 1D COMPLEX  
 Dim\_size = 13107  
 Dim\_title = 19F  
 Dim\_units = [ppm]  
 Dimensions = X  
 Site = ECA 500  
 Spectrometer = JNM-ECA500  
 Field\_strength = 11.7473579[T] (500[MH  
 X\_acq\_duration = 68.15744[ms]  
 X\_domain = 19F  
 X\_freq = 470.62046084[MHz]  
 X\_offset = 0[ppm]  
 X\_points = 16384  
 X\_prescans = 0  
 X\_resolution = 14.67191256[Hz]  
 X\_sweep = 240.38461538[kHz]  
 Irr\_domain = 19F  
 Irr\_freq = 470.62046084[MHz]  
 Irr\_offset = 5[ppm]  
 Tri\_domain = 19F  
 Tri\_freq = 470.62046084[MHz]  
 Tri\_offset = 5[ppm]  
 Clipped = FALSE  
 Mod\_return = 1  
 Scans = 10  
 Total\_scans = 10  
 X\_90\_width = 13.08[us]  
 X\_acq\_time = 68.15744[ms]  
 X\_angle = 45[deg]  
 X\_atn = 3[dB]  
 X\_pulse = 6.54[us]  
 Irr\_mode = Off  
 Tri\_mode = Off  
 Dante\_presat = FALSE  
 Initial\_wait = 1[s]  
 Recvr\_gain = 44  
 Relaxation\_delay = 10[s]  
 Repetition\_time = 10.06815744[s]  
 Temp\_get = 21.7[dC]

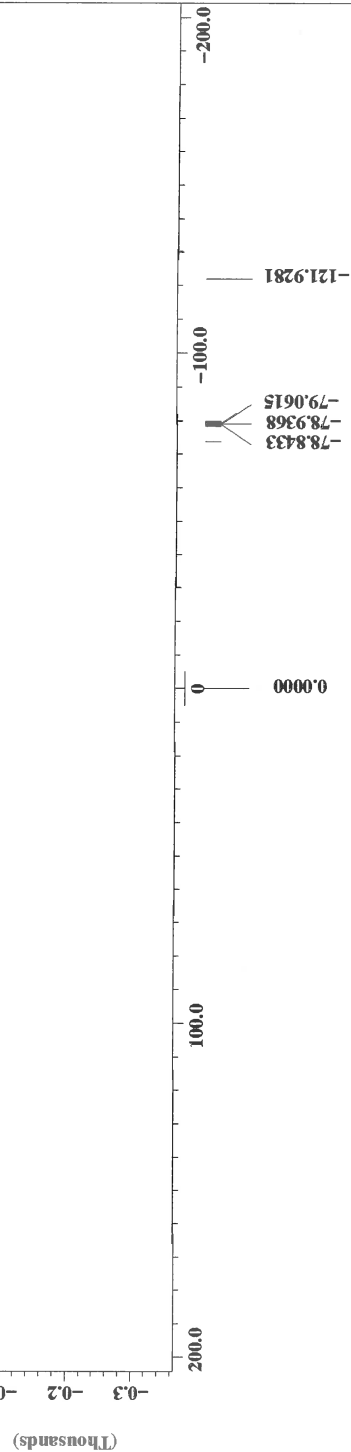



TTP-NTf<sub>2</sub> (Recovered)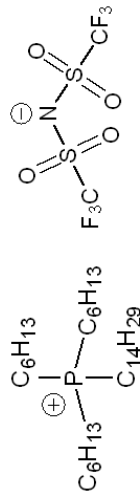TTP-NTf<sub>2</sub>

Trihexyl tetradecyl phosphonium  
bis(trifluoromethane)sulfonimide

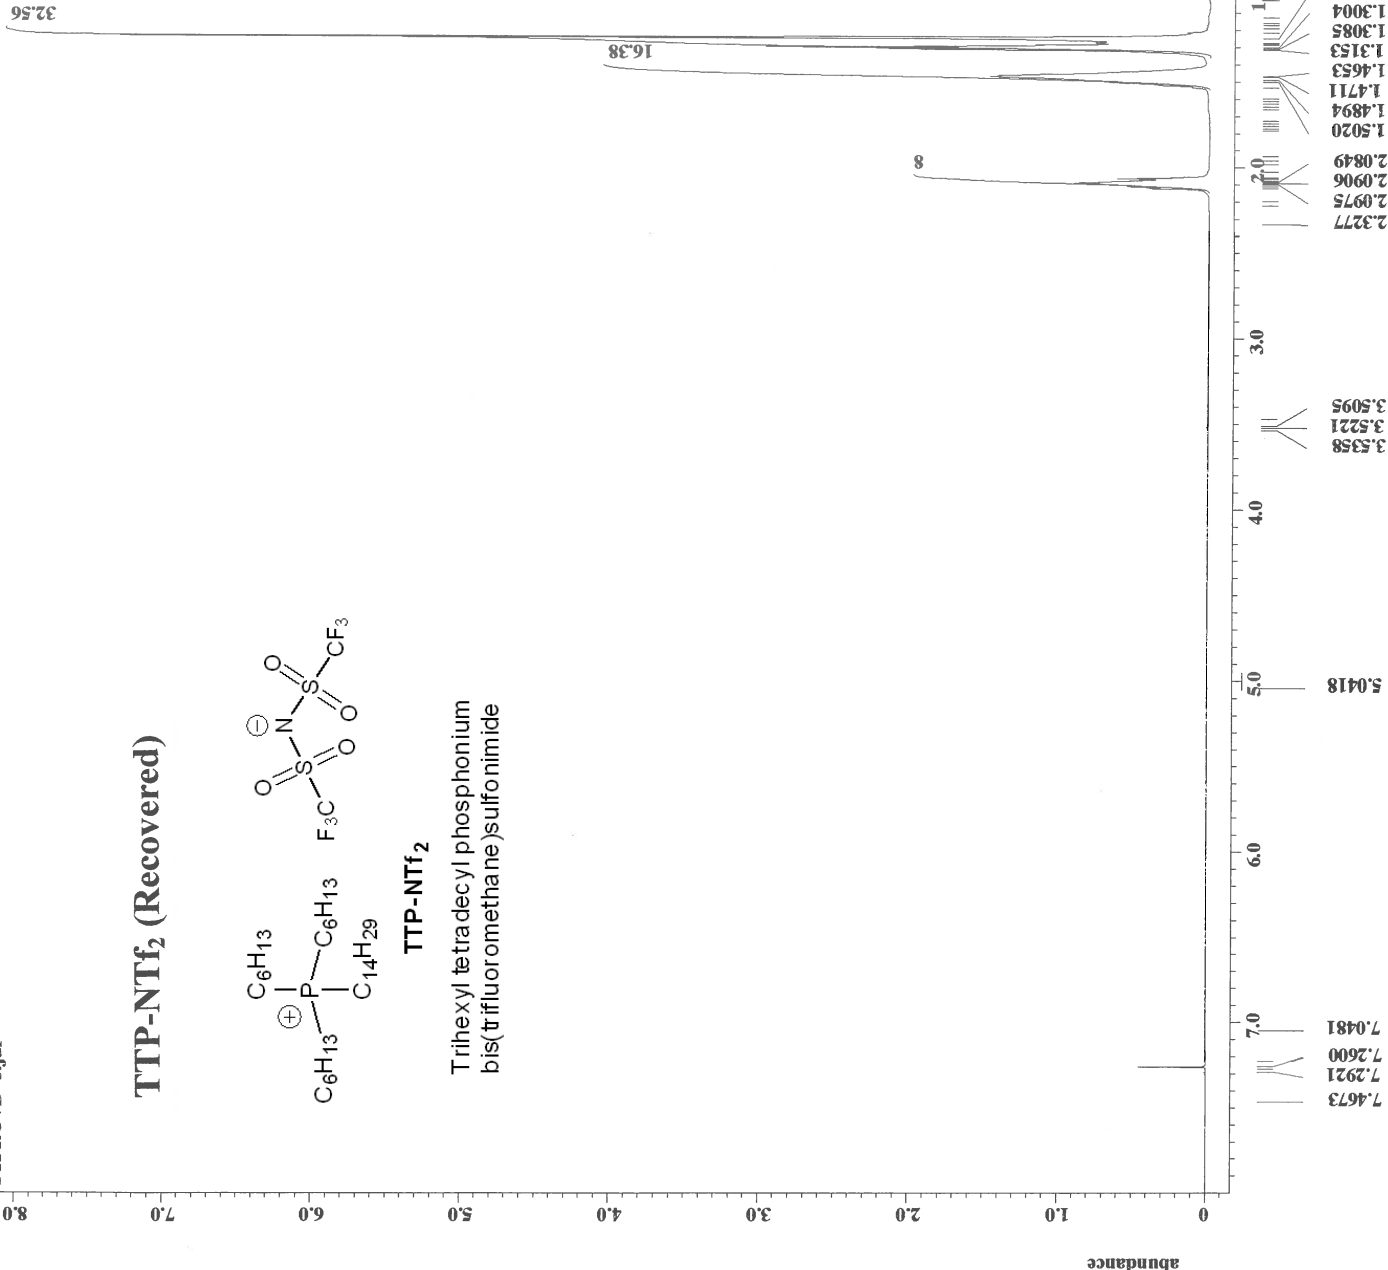

X : parts per Million : 1H

Filename = TTPRCVD-3.jdf  
 Author = delta  
 Experiment = single\_pulse.ex2  
 Sample\_id = S#708075  
 Solvent = CHLOROFORM-D  
 Creation\_time = 1-OCT-2015 08:28:39  
 Revision\_time = 30-SEP-2015 19:48:35  
 Current\_time = 30-SEP-2015 19:49:11  
 Comment = single\_pulse  
 Data\_format = 1D COMPLEX  
 Dim\_size = 13107  
 Dim\_title = 1H  
 Dim\_units = [ppm]  
 Dimensions = X  
 Site = ECA 500  
 Spectrometer = JNM-ECA500  
 Field\_strength = 11.7473579[T] (500[MH  
 X\_acq\_duration = 1.74587904[s]  
 X\_domain = 1H  
 X\_freq = 500.15991521[MHz]  
 X\_offset = 5.0[ppm]  
 X\_points = 16384  
 X\_prescans = 0  
 X\_resolution = 0.57277737[Hz]  
 X\_sweep = 9.38438438[kHz]  
 Irr\_domain = 1H  
 Irr\_freq = 500.15991521[MHz]  
 Irr\_offset = 5.0[ppm]  
 Tri\_domain = 1H  
 Tri\_freq = 500.15991521[MHz]  
 Tri\_offset = 5.0[ppm]  
 Clipped = FALSE  
 Mod\_return = 1  
 Scans = 15  
 Total\_scans = 15  
 X\_90\_width = 12.54[us]  
 X\_acq\_time = 1.74587904[s]  
 X\_angle = 45[deg]  
 X\_atn = 4[db]  
 X\_pulse = 6.27[us]  
 Irr\_mode = Off  
 Tri\_mode = Off  
 Dante\_presat = FALSE  
 Initial\_wait = 1[s]  
 Recvr\_gain = 26  
 Relaxation\_delay = 10[s]  
 Repetition\_time = 11.74587904[s]  
 Temp\_get = 21.6[dc]

1A

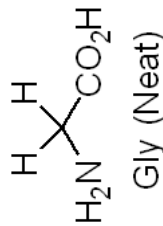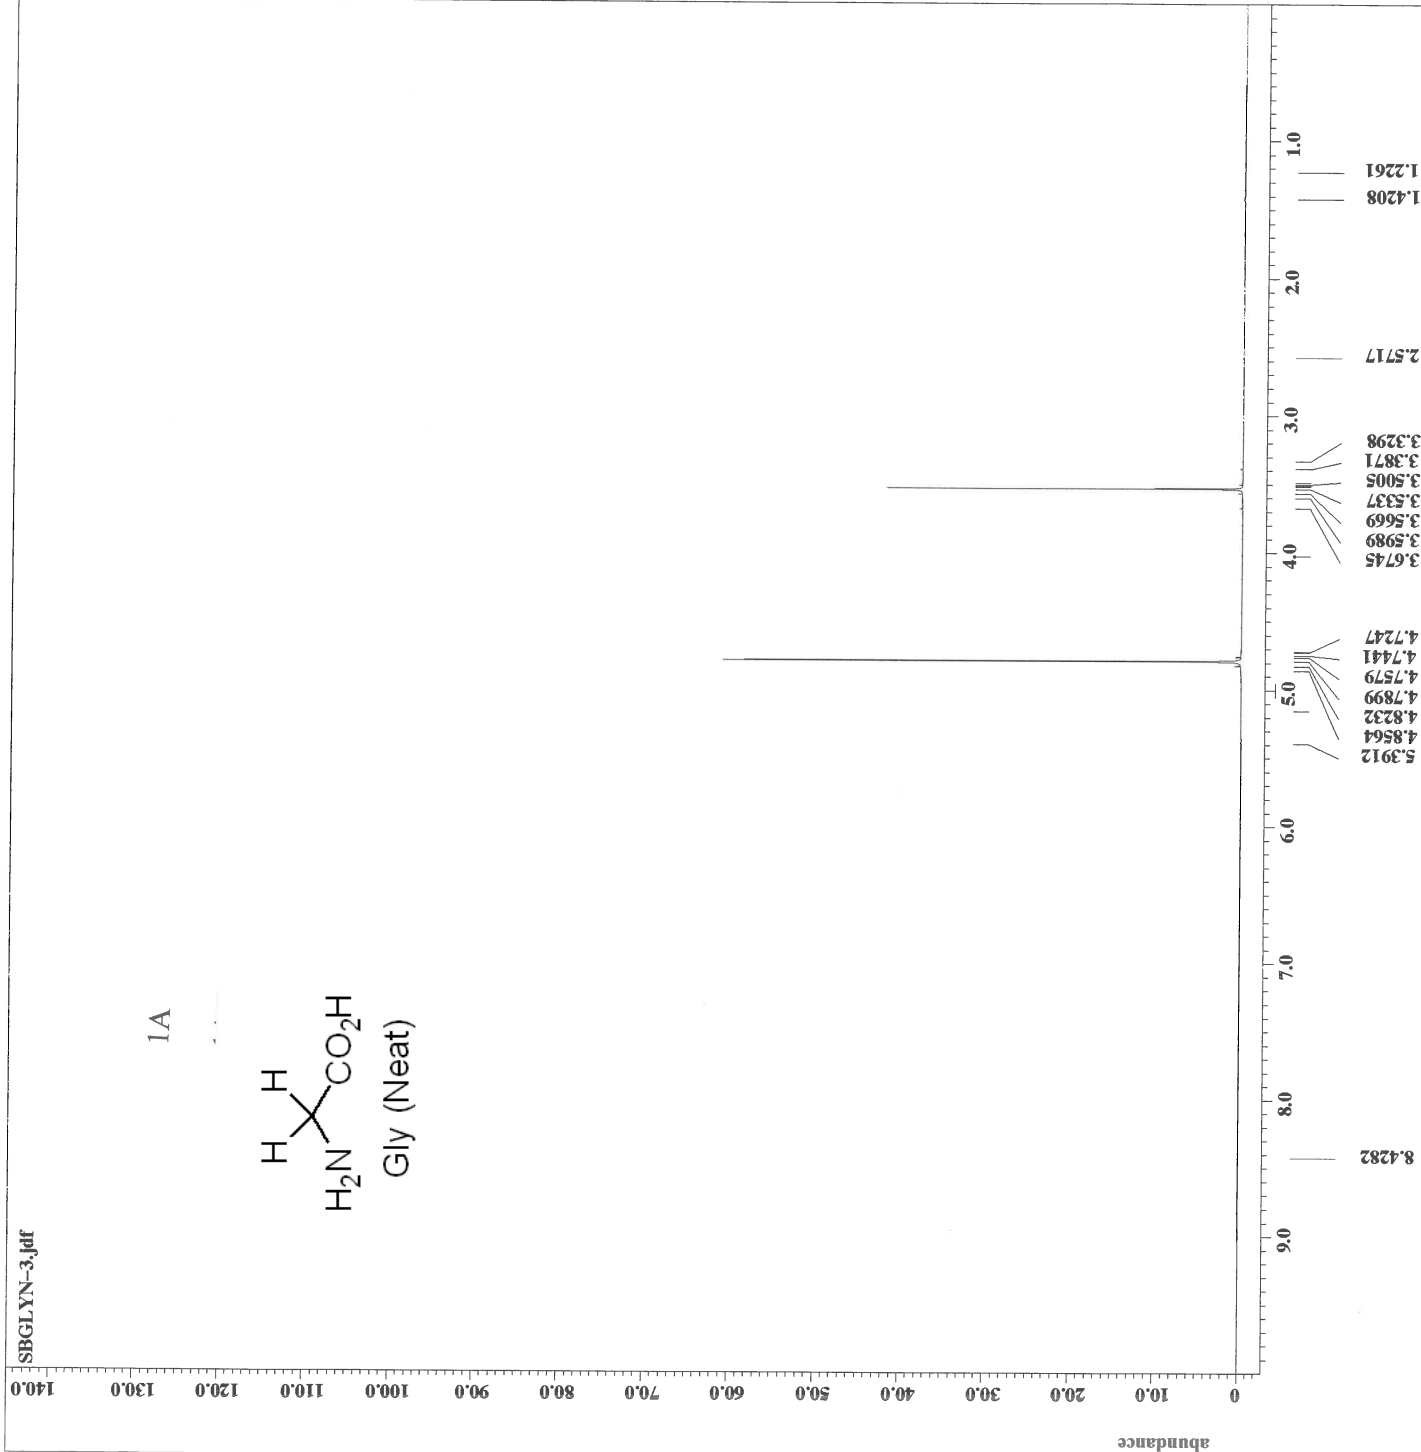

X : parts per Million : 1H

```

Filename = SBLYN-3.jdf
Author = delta
Experiment = single_pulse.ex2
Sample_id = S#346137
Solvent = D2O
Creation_time = 20-SEP-2015 22:23:39
Revision_time = 20-SEP-2015 09:40:50
Current_time = 20-SEP-2015 09:41:36

Comment = single_pulse
Data_format = 1D COMPLEX
Dim_size = 13107
Dim_title = 1H
Dim_units = [ppm]
Dimensions = X
Site = ECA 500
Spectrometer = JNM-ECA500

Field_strength = 11.7473579[T] (500MH
X_acq_duration = 1.74587904[s]
X_domain = 1H
X_freq = 500.15991521[MHz]
X_offset = 5.0[ppm]
X_points = 16384
X_prescans = 0
X_resolution = 0.57277737[Hz]
X_sweep = 9.38438438[kHz]
Irr_domain = 1H
Irr_freq = 500.15991521[MHz]
Irr_offset = 5.0[ppm]
Tri_domain = 1H
Tri_freq = 500.15991521[MHz]
Tri_offset = 5.0[ppm]
Clipped = FALSE
Mod_return = 1
Scans = 8
Total_scans = 8

X_90_width = 12.54[us]
X_acq_time = 1.74587904[s]
X_angle = 45[deg]
X_atn = 4[dB]
X_pulse = 6.27[us]
Irr_mode = Off
Tri_mode = Off
Dante_presat = FALSE
Initial_wait = 1[s]
Recvr_gain = 44
Relaxation_delay = 10[s]
Repetition_time = 11.74587904[s]
Temp_get = 21.1[DC]

```

1A

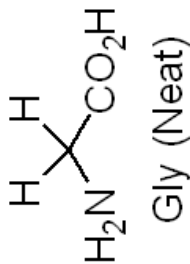

```

Filename      = SBGLYNC-2.jdf
Author        = delta
Experiment    = single_pulse_dec
Sample_id     = S#348099
Solvent       = D2O
Creation_time = 20-SEP-2015 22:29:05
Revision_time = 20-SEP-2015 09:45:19
Current_time  = 20-SEP-2015 09:45:35

Comment       = single pulse decouple
Data_format   = 1D COMPLEX
Dim_size      = 26214
Dim_title     = 13C
Dim_units     = [ppm]
Dimensions    = X
Site          = ECA 500
Spectrometer  = JNM-ECA500

Field_strength = 11.7473579[T] (500[MH
X_acq_duration = 0.83361792[s]
X_domain       = 13C
X_freq         = 125.76529768[MHz]
X_offset       = 100[ppm]
X_points       = 32768
X_prescans     = 4
X_resolution   = 1.19959034[Hz]
X_sweep        = 39.3081761[kHz]
X_domain       = 1H
X_freq         = 500.15991521[MHz]
X_offset       = 5.0[ppm]
Clipped        = FALSE
Mod_return     = 10
Scans          = 270
Total_scans    = 270

X_90_width     = 10.73[us]
X_acq_time     = 0.83361792[s]
X_angle        = 30[deg]
X_atn          = 9[db]
X_pulse        = 3.57666667[us]
X_atn_dec      = 20[db]
X_atn_noe      = 20[db]
X_noise        = WALIZ
Decoupling     = TRUE
Initial_wait   = 1[s]
Noe            = TRUE
Noe_time       = 0.2[s]
Recvr_gain     = 50
Relaxation_delay = 0.2[s]
Repetition_time = 1.03361792[s]
Temp_get       = 21.6[dc]

```

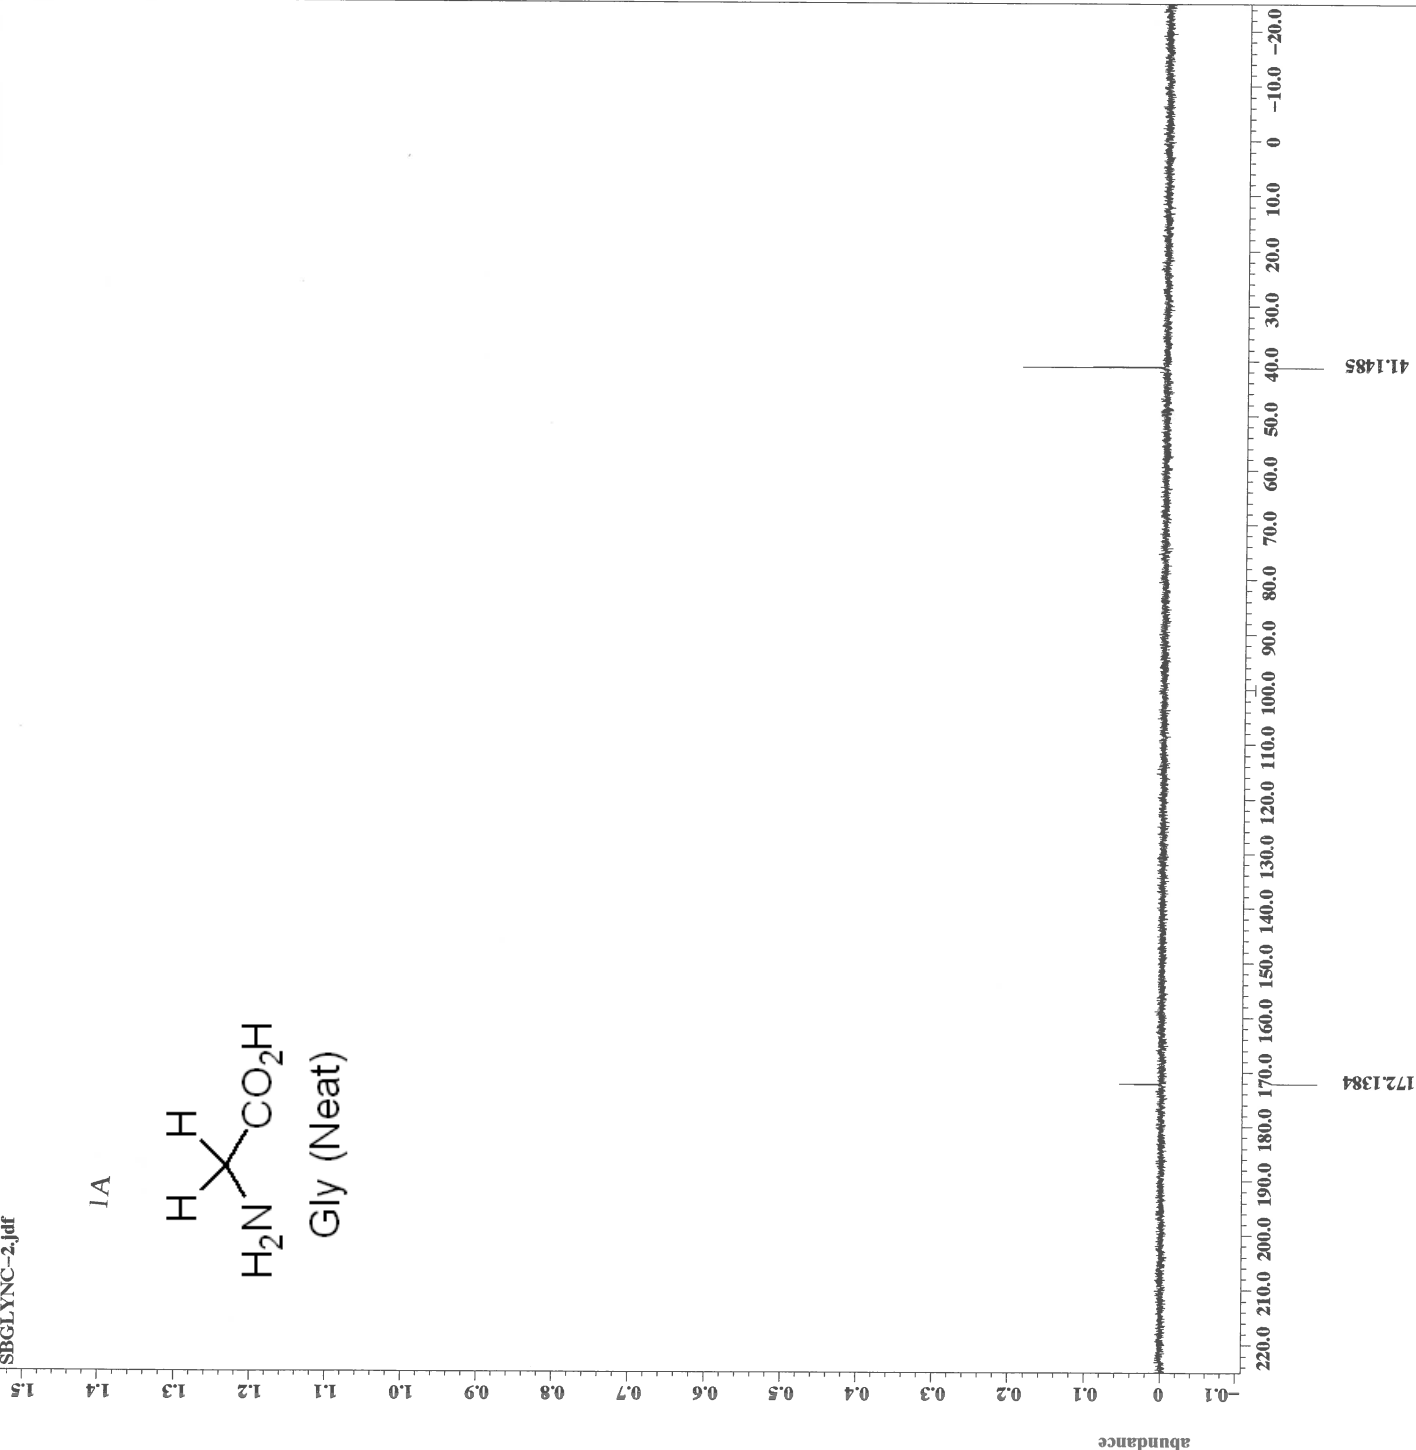

X : parts per Million : 13C

2A

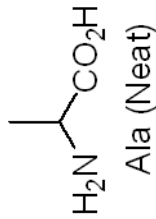

3.06

```

Filename      = SBALAN-3.jdf
Author       = delta
Experiment   = single_pulse.ex2
Sample_id    = S#351169
Solvent      = D2O
Creation_time = 23-SEP-2015 22:31:57
Revision_time = 23-SEP-2015 09:49:29
Current_time  = 23-SEP-2015 09:50:12

Comment
Data_format  = single_pulse
Dim_size     = 1D COMPLEX
Dim_title    = 13107
Dim_units    = [ppm]
Dimensions   = X
Site         = ECA 500
Spectrometer = JNM-ECA500

Field_strength = 11.7473579[T] (500[MH
X_acq_duration = 1.74587904[s]
X_domain       = 1K
X_freq         = 500.15991521[MHz]
X_offset       = 5.0[pFm]
X_points       = 16384
X_prescans     = 0
X_resolution   = 0.57277737[Hz]
X_sweep        = 9.38438438[kHz]
Irr_domain     = 1K
Irr_freq       = 500.15991521[MHz]
Irr_offset     = 5.0[pFm]
Tri_domain     = 1K
Tri_freq       = 500.15991521[MHz]
Tri_offset     = 5.0[pFm]
Clipped        = FALSE
Mod_return     = 1
Scans          = 7
Total_scans    = 7

X_90_width     = 12.54[us]
X_acq_time     = 1.74587904[s]
X_angle        = 45[deg]
X_atn          = 4[db]
X_pulse        = 6.27[us]
Irr_mode       = Off
Tri_mode       = Off
Dante_preset   = FALSE
Initial_wait   = 1[s]
Recvr_gain     = 46
Relaxation_delay = 10[s]
Repetition_time = 11.74587904[s]
Temp_get       = 22[dc]

```

abundance

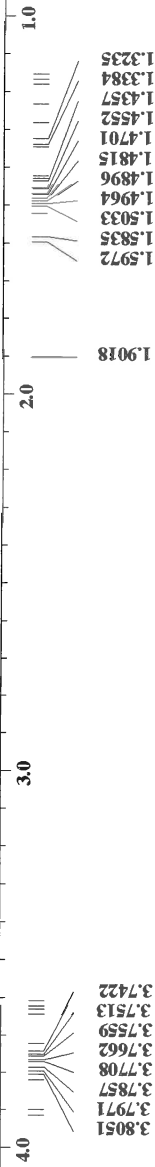

2A

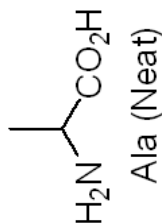

```

Filename      = SBALANC-2.jdf
Author        = delta
Experiment    = single_pulse_dec
Sample_id     = S#352979
Solvent       = D2O
Creation_time = 23-SEP-2015 22:37:29
Revision_time = 23-SEP-2015 09:53:49
Current_time  = 23-SEP-2015 09:54:01

Comment       = single pulse decouple
Data_format   = 1D COMPLEX
Dim_size      = 26214
Dim_title     = 13C
Dim_units     = [ppm]
Dimensions    = X
Site          = ECA 500
Spectrometer  = JNM-ECA500

Field_strength = 11.7473579[T] (500[MH
X_acq_duration = 0.83361792[s]
X_domain       = 13C
X_freq         = 125.76529768[MHz]
X_offset       = 100[ppm]
X_points       = 32768
X_prescans     = 4
X_resolution   = 1.19959034[Hz]
X_sweep        = 39.3081761[kHz]
Irr_domain     = 1H
Irr_freq       = 500.15991521[MHz]
Irr_offset     = 5.0[ppm]
Clipped        = FALSE
Mod_return     = 10
Scans          = 280
Total_scans    = 280

X_90_width     = 10.73[us]
X_acq_time     = 0.83361792[s]
X_angle        = 30[deg]
X_atn          = 9[db]
X_pulse        = 3.57666667[us]
Irr_atn_dec    = 20[db]
Irr_atn_noe    = 20[db]
Irr_noise      = WALTZ
Decoupling     = TRUE
Initial_wait   = 1[s]
Noe            = TRUE
Noe_time       = 0.2[s]
Recvr_gain     = 50
Relaxation_delay = 0.2[s]
Repetition_time = 1.03361792[s]
Temp_get       = 22.4[dc]

```

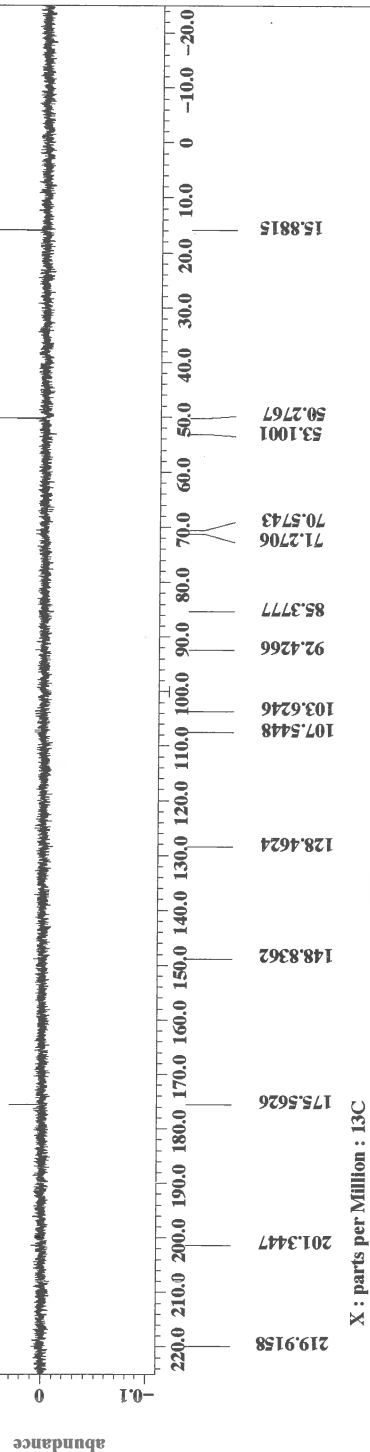

3 A

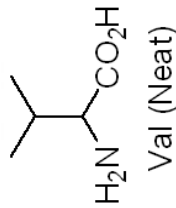

6.56

0.94

1

abundance

4.0

3.0

2.0

1.0

3.7971 3.7364 3.7273 3.5933 3.5853 3.4467 3.1535 3.1398 2.9989 2.8420 2.8329 2.8180 2.5500 2.2660 2.2614 2.2523 2.0805 2.0003 1.9454 1.9316 1.9179 1.7850 1.5045 1.4506 1.4174 1.2880 1.0292 1.0155 0.9777 0.9628 0.9307 0.9170 0.8952 0.8826

X : parts per Million : 1H

Filename = SBVALN-3.jdf  
 Author = deita  
 Experiment = single\_pulse.ex2  
 Sample\_id = S#338198  
 Solvent = D2O  
 Creation\_time = 23-SEP-2015 22:10:56  
 Revision\_time = 23-SEP-2015 09:28:38  
 Current\_time = 23-SEP-2015 09:29:28  
 Comment = single\_pulse  
 Data\_format = ID COMPLEX  
 Dim\_size = 13107  
 Dim\_title = 1H  
 Dim\_units = [ppm]  
 Dimensions = X  
 Site = ECA 500  
 Spectrometer = JNM-ECA500  
 Field\_strength = 11.7473579[T] (500[MH  
 X\_acq\_duration = 1.74587904[s]  
 X\_domain = 1H  
 X\_freq = 500.15991521[MHz]  
 X\_offset = 5.0[ppm]  
 X\_points = 16384  
 X\_prescans = 0  
 X\_resolution = 0.57277737[Hz]  
 X\_sweep = 9.38438438[kHz]  
 Irr\_domain = 1H  
 Irr\_freq = 500.15991521[MHz]  
 Irr\_offset = 5.0[ppm]  
 Tri\_domain = 1H  
 Tri\_freq = 500.15991521[MHz]  
 Tri\_offset = 5.0[ppm]  
 Clipped = FALSE  
 Mod\_return = 1  
 Scans = 10  
 Total\_scans = 10  
 X\_90\_width = 12.54[us]  
 X\_acq\_time = 1.74587904[s]  
 X\_angle = 45[deg]  
 X\_atn = 4[db]  
 X\_pulse = 6.27[us]  
 Irr\_mode = Off  
 Tri\_mode = Off  
 Dante\_presat = FALSE  
 Initial\_wait = 1[s]  
 Recvr\_gain = 36  
 Relaxation\_delay = 10[s]  
 Repetition\_time = 11.74587904[s]  
 Temp\_get = 21.9[dc]

3A

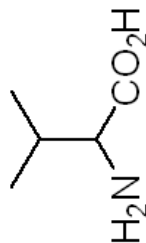

Val (Neat)

Filename = SBVALCN-2.jdf  
Author = delta  
Experiment = single\_pulse\_dec  
Sample\_id = S#340420  
Solvent = D2O  
Creation\_time = 23-SEP-2015 22:16:54  
Revision\_time = 23-SEP-2015 09:33:18  
Current\_time = 23-SEP-2015 09:35:42  
Comment = single pulse decouple  
Data\_format = 1D COMPLEX  
Dim\_size = 26214  
Dim\_title = 13C  
Dim\_units = [ppm]  
Dimensions = 1  
Site = ECA 500  
Spectrometer = JNM-ECA500  
Field\_strength = 11.7473579[T] (500[MH  
X\_acq\_duration = 0.83361792[s]  
X\_domain = 13C  
X\_freq = 125.76529768[MHz]  
X\_offset = 100[ppm]  
X\_points = 32768  
X\_prescans = 4  
X\_resolution = 1.19959034[Hz]  
X\_sweep = 39.3081761[kHz]  
Irr\_domain = 1H  
Irr\_freq = 500.15991521[MHz]  
Irr\_offset = 5.0[ppm]  
Clipped = FALSE  
Mod\_return = 10  
Scans = 300  
Total\_scans = 300  
X\_90\_width = 10.73[us]  
X\_acq\_time = 0.83361792[s]  
X\_angle = 30[deg]  
X\_atn = 9[db]  
X\_pulse = 3.57666667[us]  
Irr\_atn\_dec = 20[db]  
Irr\_atn\_noe = 20[db]  
Irr\_noise = WALTZ  
Decoupling = TRUE  
Initial\_wait = 1[s]  
Noe = TRUE  
Noe\_time = 0.2[s]  
Recvr\_gain = 50  
Relaxation\_delay = 0.2[s]  
Repetition\_time = 1.03361792[s]  
Temp\_get = 22.4[dc]

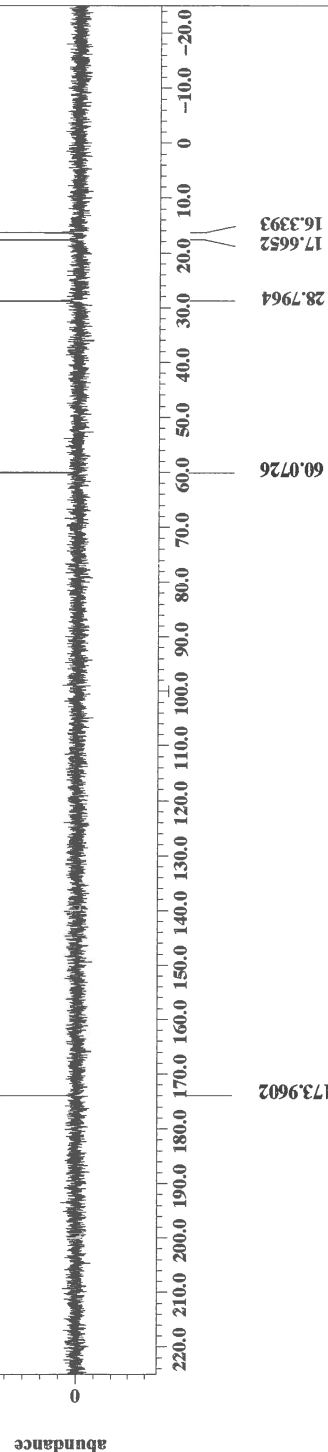

4A

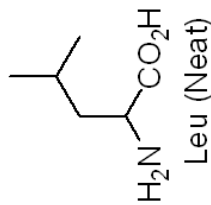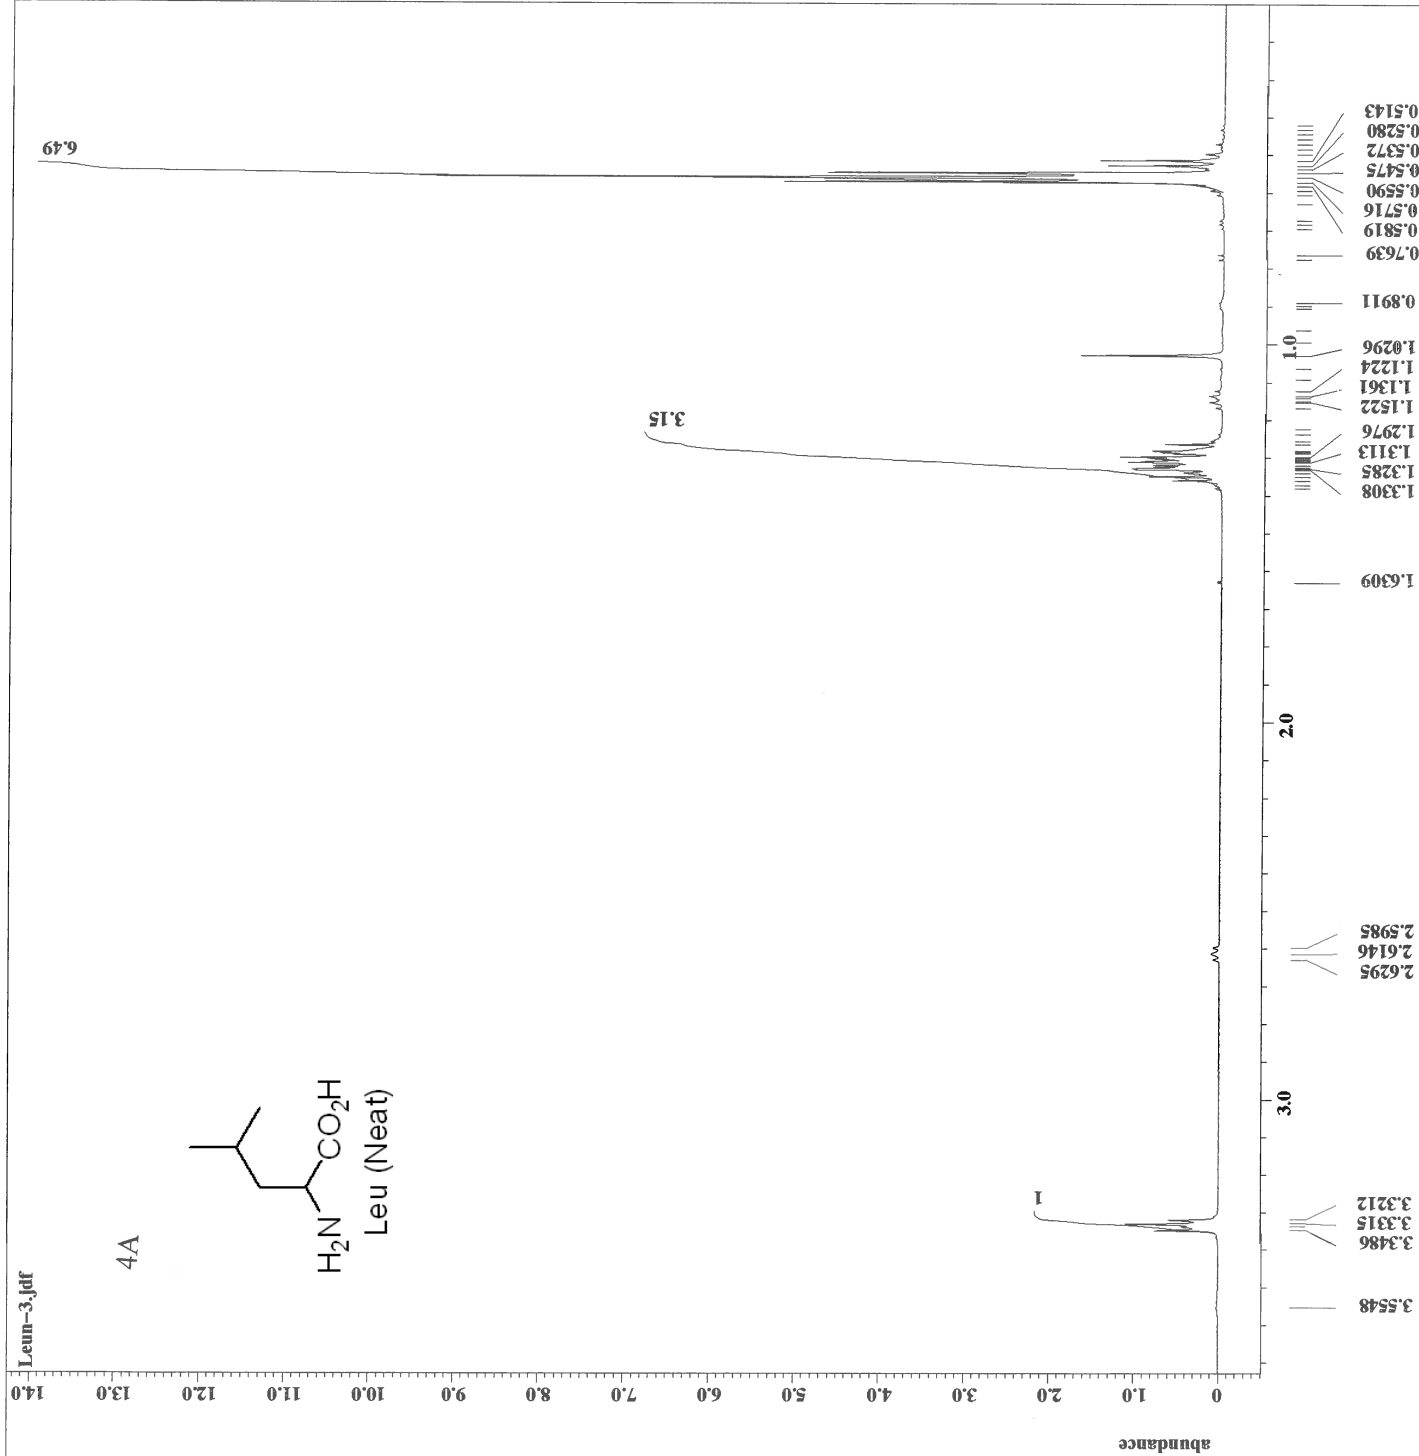

X : parts per Million : 1H

```

Filename = Leu-3.jdf
Author = Delta
Experiment = single_pulse.ex2
Sample_id = S#728776
Solvent = D2O
Creation_time = 24-SEP-2015 09:03:05
Revision_time = 23-SEP-2015 20:20:02
Current_time = 23-SEP-2015 20:21:18

Comment = single_pulse
Data_format = 1D COMPLEX
Dim_size = 13107
Dim_title = 1H
Dim_units = [ppm]
Dimensions = X
Site = ECA 500
Spectrometer = JNM-ECA500

Field_strength = 11.7473579[T] (500[MH
X_acq_duration = 1.74587904[s]
X_domain = 1H
X_freq = 500.15991521[MHz]
X_offset = 5.0[ppm]
X_points = 16384
X_prescans = 0
X_resolution = 0.57277737[Hz]
X_sweep = 9.38438438[kHz]
Irr_domain = 1H
Irr_freq = 500.15991521[MHz]
Irr_offset = 5.0[ppm]
Tri_domain = 1H
Tri_freq = 500.15991521[MHz]
Tri_offset = 5.0[ppm]
Clipped = FALSE
Mod_return = 1
Scans = 16
Total_scans = 16

X_90_width = 12.54[us]
X_acq_time = 1.74587904[s]
X_angle = 45[deg]
X_atn = 4[db]
X_pulse = 6.27[us]
Irr_mode = Off
Tri_mode = Off
Dante_presat = FALSE
Initial_wait = 1[s]
Recvr_gain = 48
Relaxation_delay = 10[s]
Repetition_time = 11.74587904[s]
Temp_get = 22[dc]

```



5A

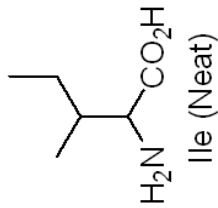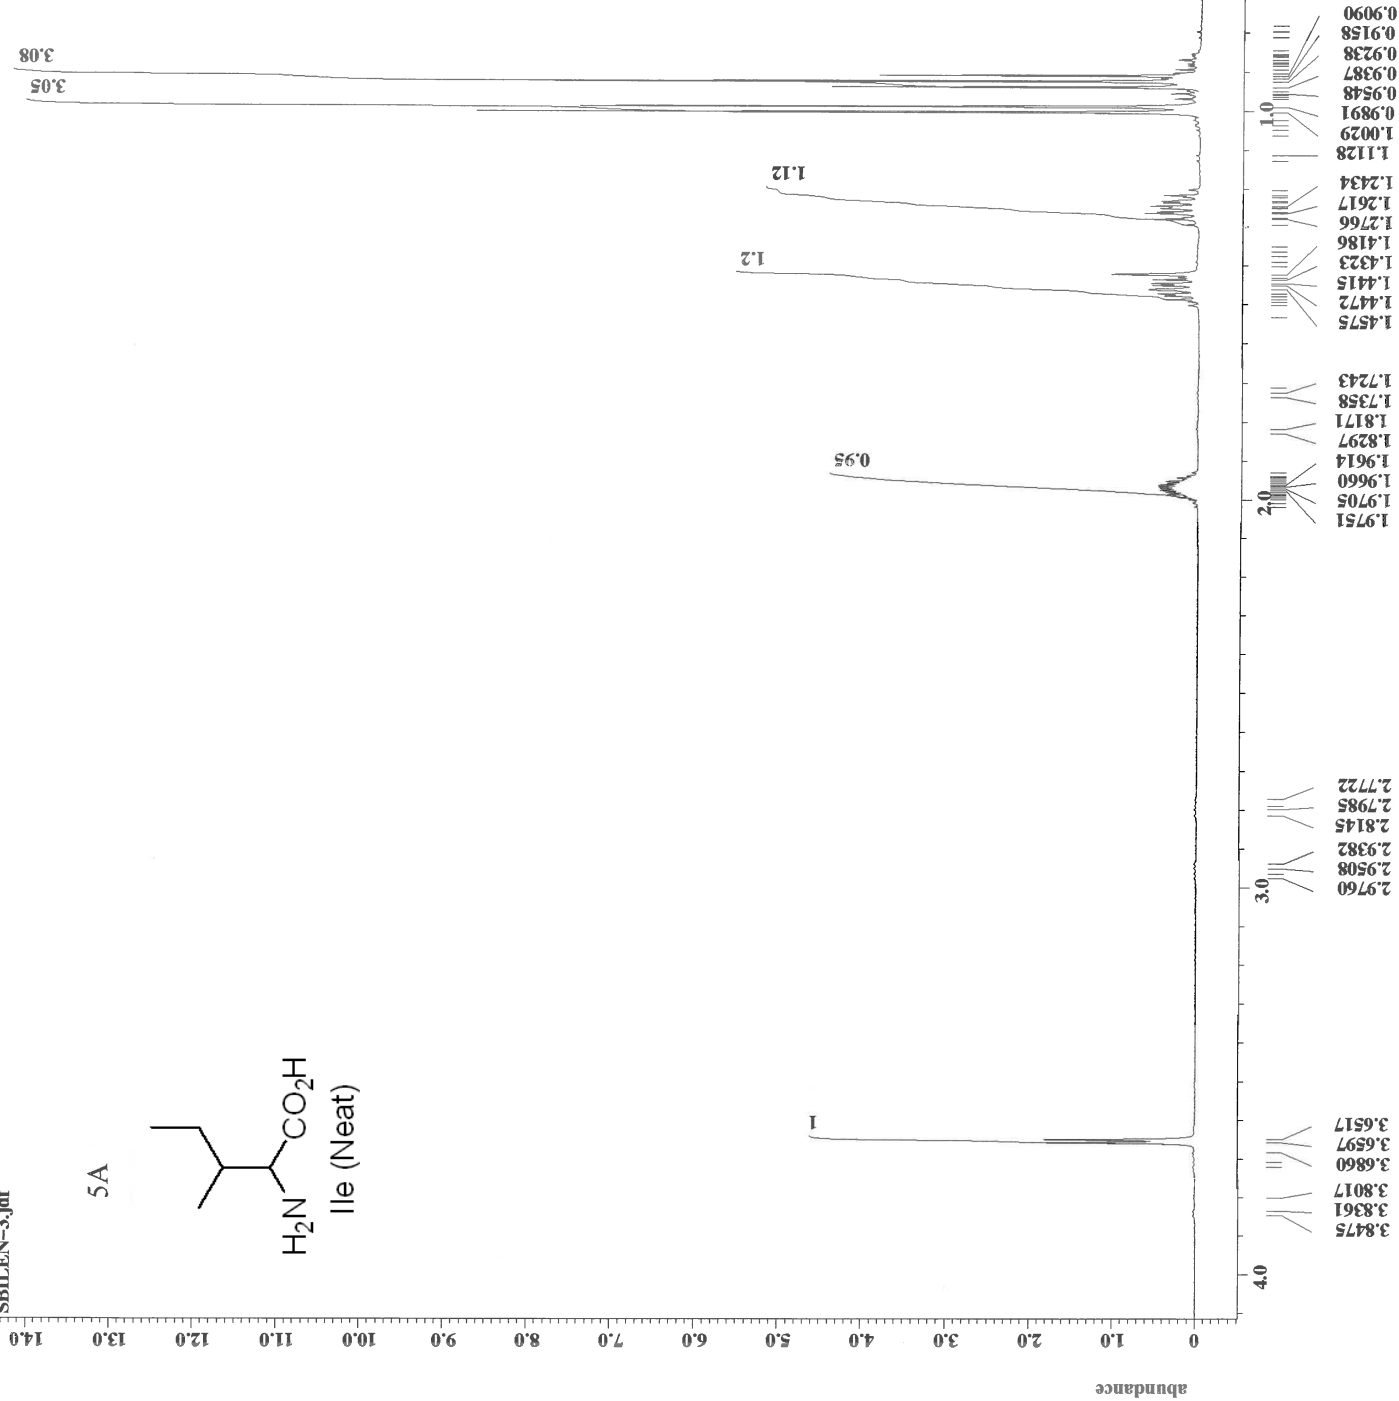

5A

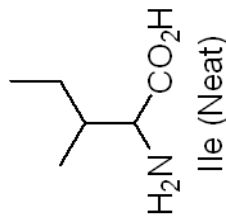

Filename = SBILECN-2.jdf  
 Author = delta  
 Experiment = single\_pulse\_dec  
 Sample\_id = S#475404  
 Solvent = D2O  
 Creation\_time = 24-SEP-2015 02:02:00  
 Revision\_time = 23-SEP-2015 13:18:17  
 Current\_time = 23-SEP-2015 13:18:27  
 Comment = single pulse decouple  
 Data\_format = 1D COMPLEX  
 Dim\_size = 26214  
 Dim\_title = 13C  
 Dim\_units = [ppm]  
 Dimensions = X  
 Site = ECA 500  
 Spectrometer = JNM-ECA500  
 Field\_strength = 11.7473579[T] (500[MH  
 X\_acq\_duration = 0.83361792[s]  
 X\_domain = 13C  
 X\_freq = 125.76529768[MHz]  
 X\_offset = 100[ppm]  
 X\_points = 32768  
 X\_prescans = 4  
 X\_resolution = 1.19959034[Hz]  
 X\_sweep = 39.3081761[kHz]  
 Irr\_domain = 1H  
 Irr\_freq = 500.15991521[MHz]  
 Irr\_offset = 5.0[ppm]  
 Clipped = FALSE  
 Mod\_return = 10  
 Scans = 340  
 Total\_scans = 340  
 X\_90\_width = 10.73[us]  
 X\_acq\_time = 0.83361792[s]  
 X\_angle = 30[deg]  
 X\_atn = 9[db]  
 X\_pulse = 3.57666667[us]  
 Irr\_atn\_dec = 20[db]  
 Irr\_atn\_noe = 20[db]  
 Irr\_noise = WALTZ  
 Decoupling = TRUE  
 Initial\_wait = 1[s]  
 Noe = TRUE  
 Noe\_time = 0.1[s]  
 Recvr\_gain = 50  
 Relaxation\_delay = 0.1[s]  
 Repetition\_time = 0.93361792[s]  
 Temp\_get = 22.4[dc]

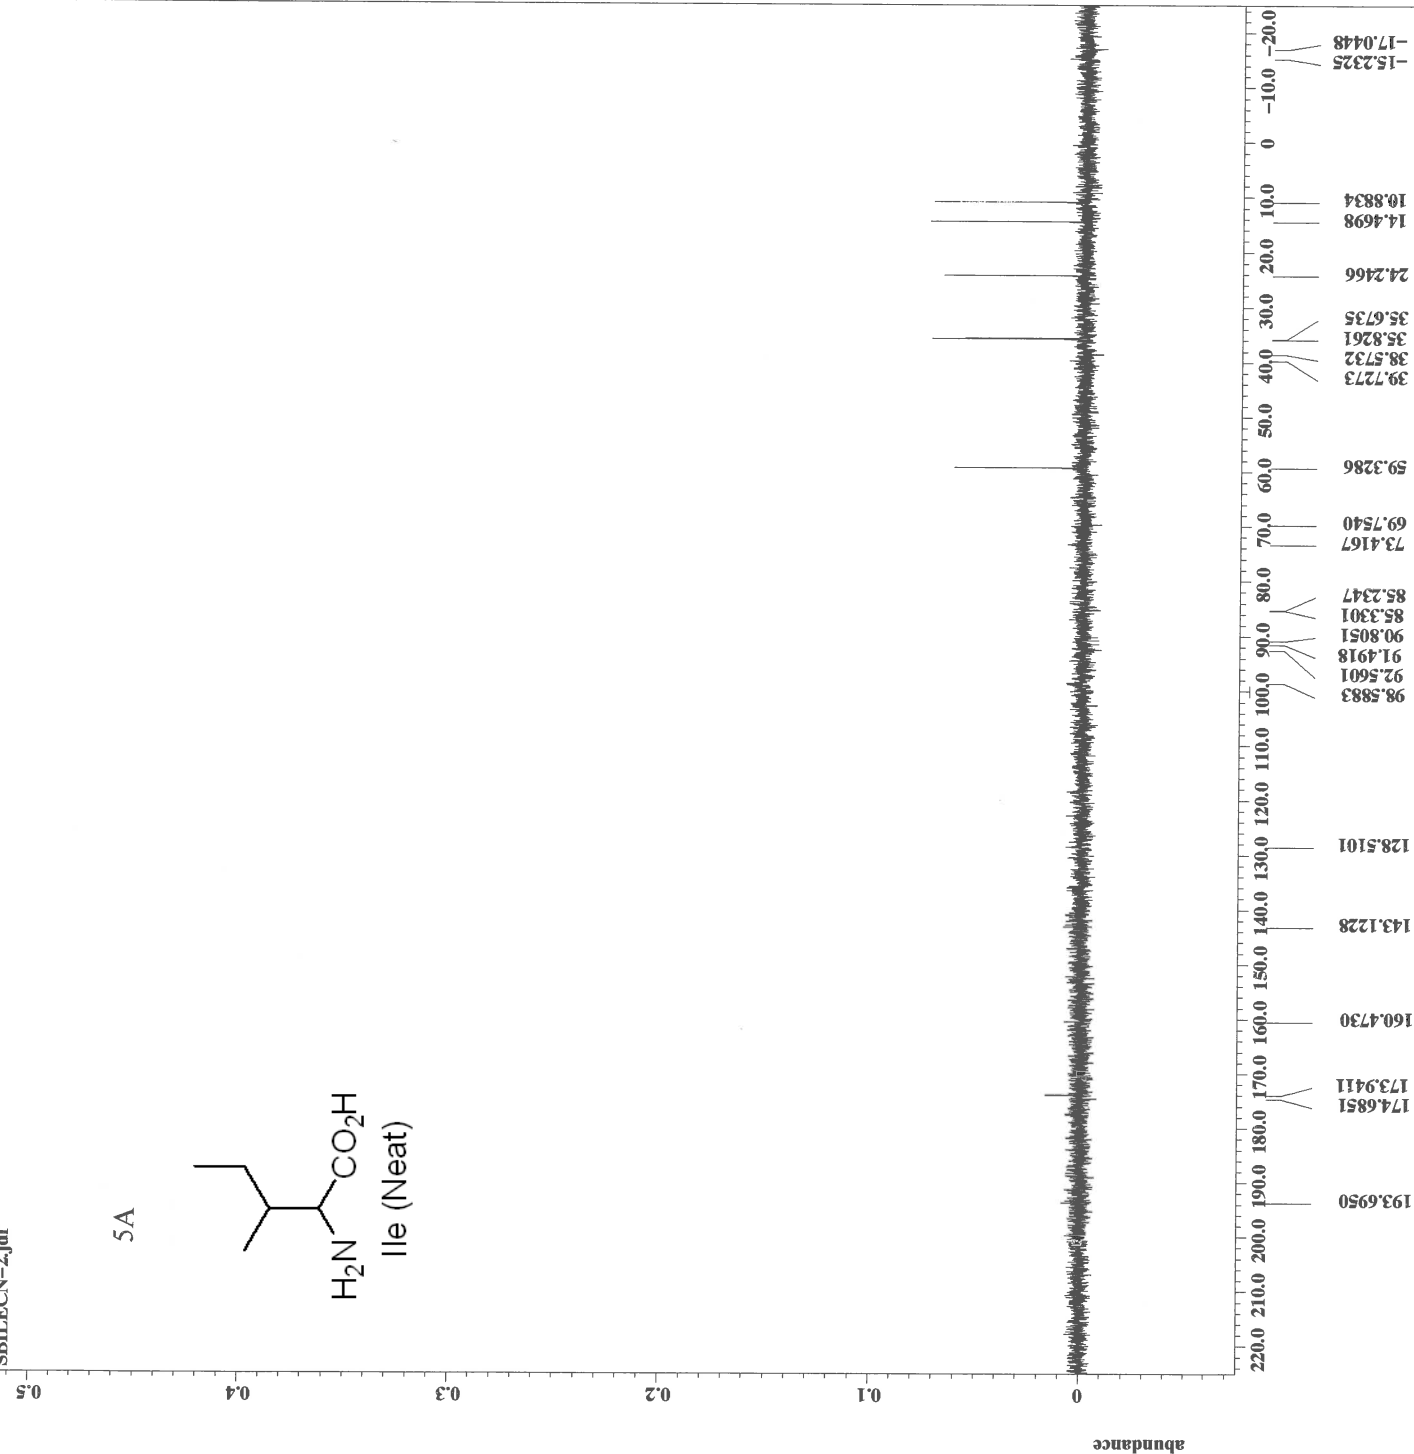

X : parts per Million : 13C

6A

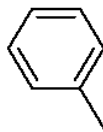H<sub>2</sub>N—CH—CO<sub>2</sub>H

Phe (Neat)

Filename = SBPHAN-3.jdf  
 Author = delta  
 Experiment = single\_pulse.ex2  
 Sample\_id = S#347797  
 Solvent = D2O  
 Creation\_time = 24-SEP-2015 22:26:34  
 Revision\_time = 24-SEP-2015 09:44:03  
 Current\_time = 24-SEP-2015 09:44:42  
 Comment = single\_pulse  
 Data\_format = 1D COMPLEX  
 Dim\_size = 13107  
 Dim\_title = 1H  
 Dim\_units = [ppm]  
 Dimensions = X  
 Site = ECA 500  
 Spectrometer = JNM-ECA500  
 Field\_strength = 11.7473579[T] (500[MH  
 X\_acq\_duration = 1.74587904[s]  
 X\_domain = 1H  
 X\_freq = 500.15991521[MHz]  
 X\_offset = 5.0[ppm]  
 X\_points = 16384  
 X\_prescans = 0  
 X\_resolution = 0.57277737[Hz]  
 X\_sweep = 9.38438438[kHz]  
 X\_domain = 1H  
 X\_freq = 500.15991521[MHz]  
 X\_offset = 5.0[ppm]  
 Tri\_domain = 1H  
 Tri\_freq = 500.15991521[MHz]  
 Tri\_offset = 5.0[ppm]  
 Clipped = FALSE  
 Mod\_return = 1  
 Scans = 8  
 Total\_scans = 8  
 X\_90\_width = 12.54[us]  
 X\_acq\_time = 1.74587904[s]  
 X\_angle = 45[deg]  
 X\_atn = 4[db]  
 X\_pulse = 6.27[us]  
 X\_mode = Off  
 Tri\_mode = Off  
 Dante\_presat = FALSE  
 Initial\_wait = 1[s]  
 Recvr\_gain = 36  
 Relaxation\_delay = 10[s]  
 Repetition\_time = 11.74587904[s]  
 Temp\_get = 21.7[dC]

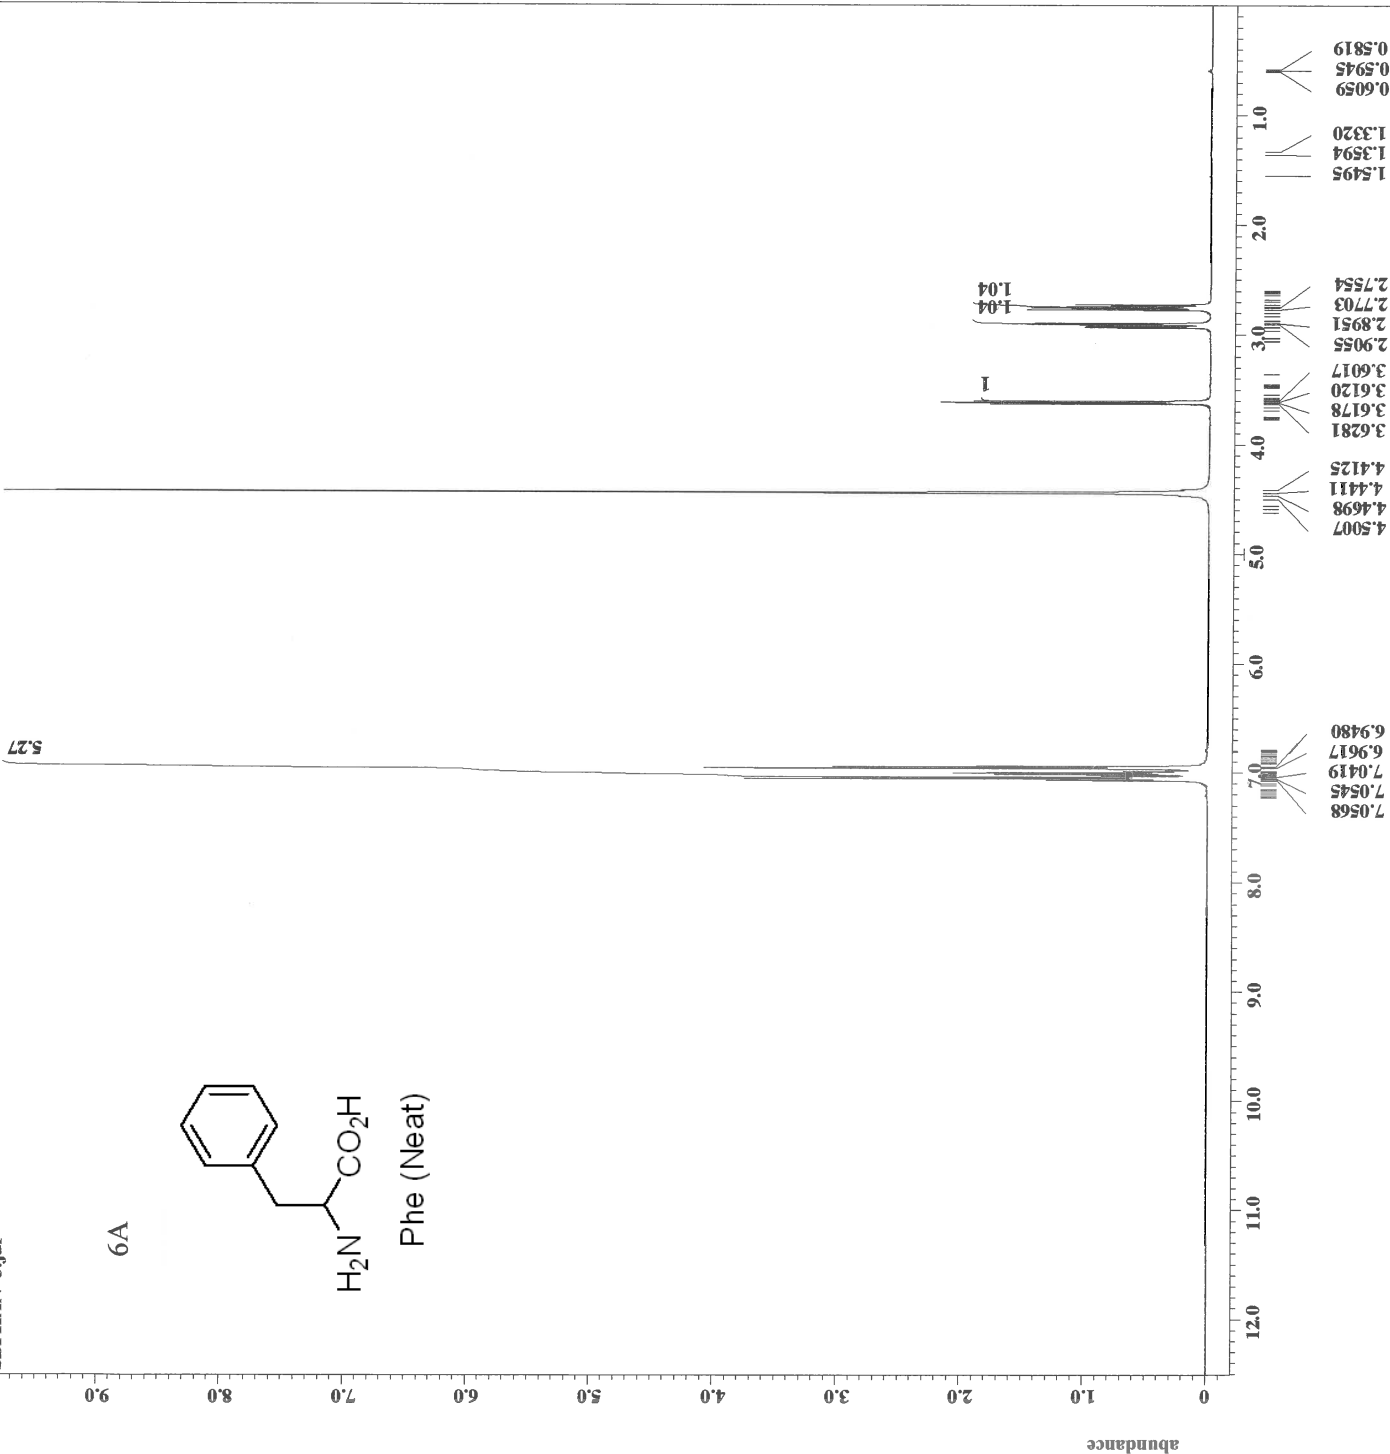

6A

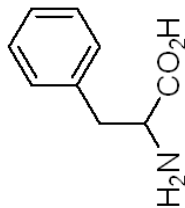

Phe (Neat)

```

Filename      = SBPHANC-2.jdf
Author        = delta
Experiment    = single_pulse_dec
Sample_id     = S#349860
Solvent       = D2O
Creation_time  = 24-SEP-2015 22:30:47
Revision_time  = 24-SEP-2015 09:46:43
Current_time   = 24-SEP-2015 09:46:50

Comment       = single pulse decouple
Data_format   = 1D COMPLEX
Dim_size      = 26214
Dim_title     = 13C
Dim_units     = [ppm]
Dimensions    = X
Site          = ECA 500
Spectrometer  = JNM-ECA500

Field_strength = 11.7473579[T] (500[MH
X_acq_duration = 0.83361792[s]
X_domain       = 13C
X_freq         = 125.76529768[MHz]
X_offset       = 100[ppm]
X_points       = 32768
X_prescans     = 4
X_resolution   = 1.19959034[Hz]
X_sweep        = 39.3081761[kHz]
Irr_domain     = 1H
Irr_freq       = 500.15991521[MHz]
Irr_offset     = 5.0[ppm]
Clipped        = FALSE
Mod_return     = 10
Scans          = 190
Total_scans    = 190

X_90_width     = 10.73[us]
X_acq_time     = 0.83361792[s]
X_angle        = 30[deg]
X_atn          = 9[db]
X_pulse        = 3.57666667[us]
Irr_atn_dec    = 20[db]
Irr_atn_noe    = 20[db]
Irr_noise      = WALTZ
Decoupling     = TRUE
Initial_wait   = 1[s]
Noe            = TRUE
Noe_time       = 0.2[s]
Recvr_gain     = 50
Relaxation_delay = 0.2[s]
Repetition_time = 1.03361792[s]
Temp_get       = 22.1[dC]

```

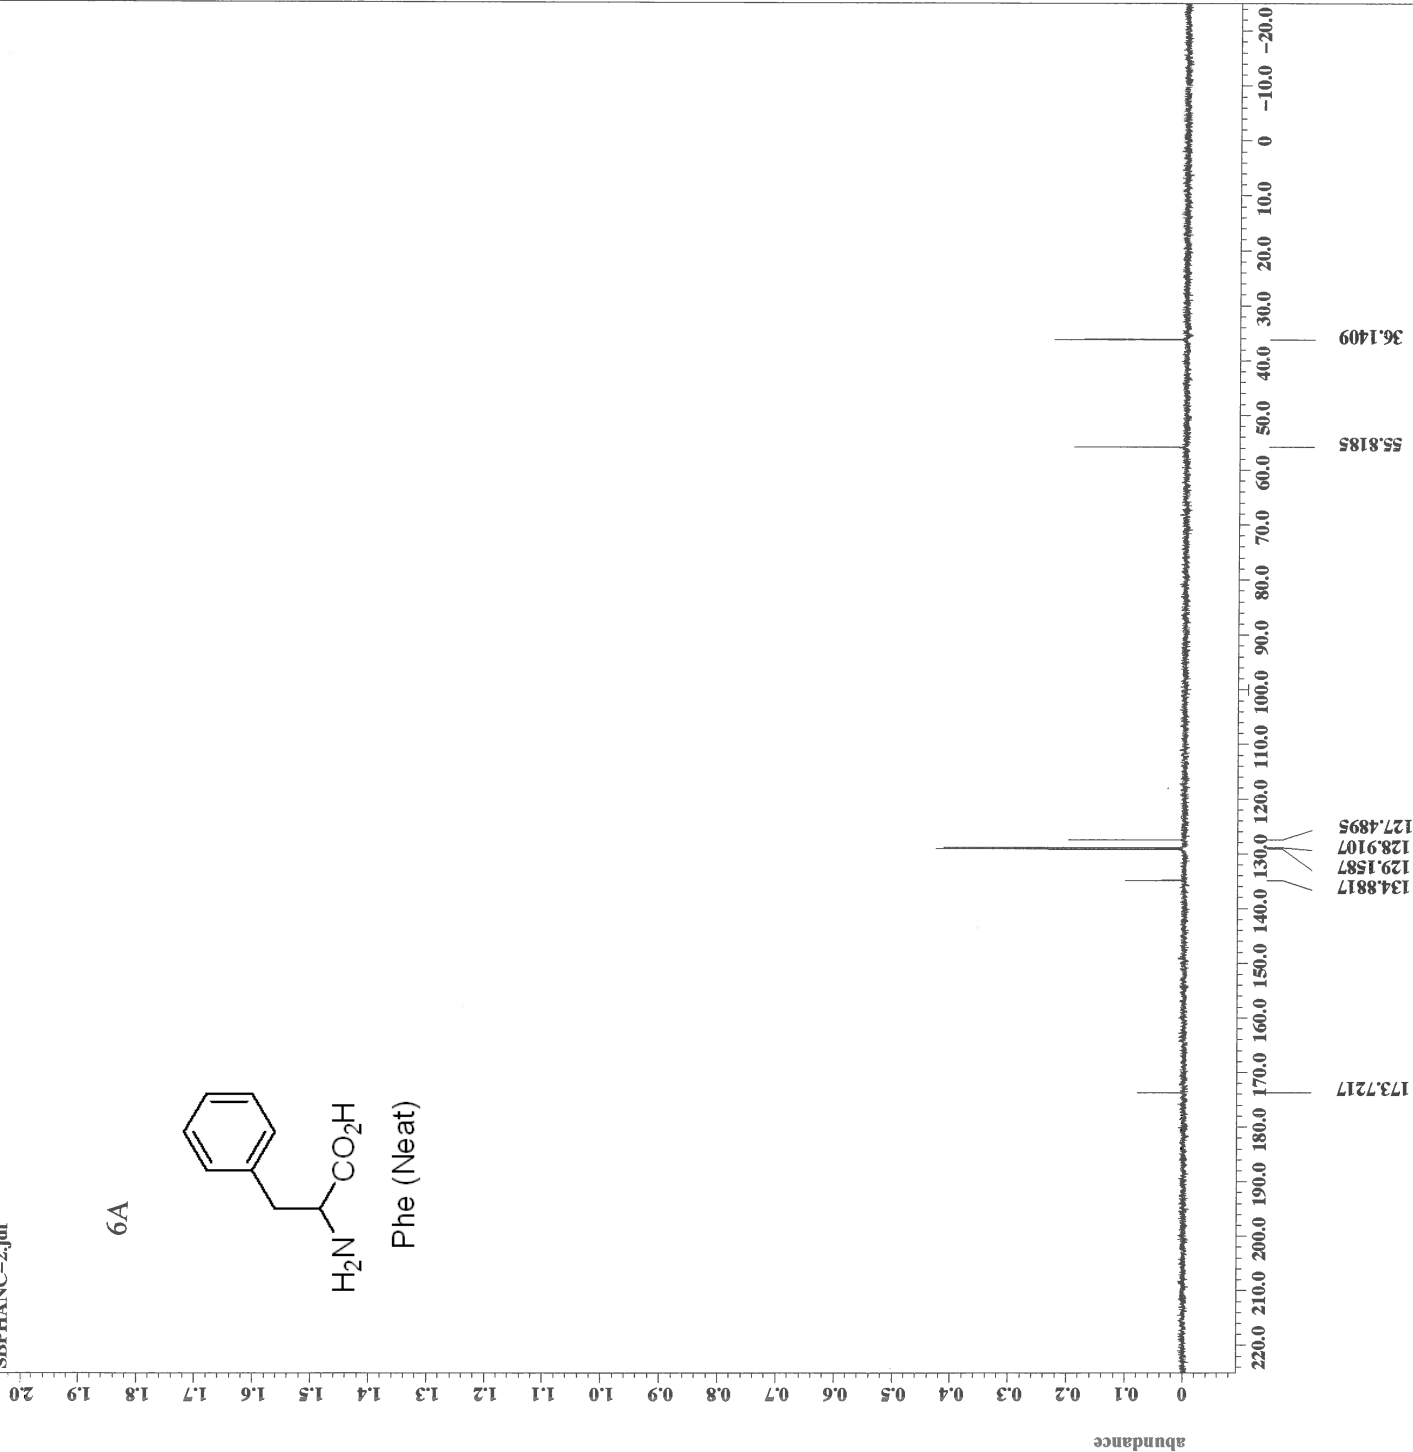

12A

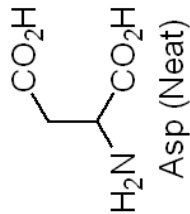

Filename = SBASPN-3.jdf  
 Author = delta  
 Experiment = single\_pulse.ex2  
 Sample\_id = S#481740  
 Solvent = D2O  
 Creation\_time = 24-SEP-2015 02:09:34  
 Revision\_time = 23-SEP-2015 13:26:50  
 Current\_time = 23-SEP-2015 13:27:30  
 Comment = single\_pulse  
 Data\_format = 1D COMPLEX  
 Dim\_size = 13107  
 Dim\_title = 1H  
 Dim\_units = [ppm]  
 Dimensions = X  
 Site = ECA 500  
 Spectrometer = JNM-ECA500  
 Field\_strength = 11.7473579[T] (500[MH  
 X\_acq\_duration = 1.74587904[s]  
 X\_domain = 1H  
 X\_freq = 500.15991521[MHz]  
 X\_offset = 5.0[ppm]  
 X\_points = 16384  
 X\_prescans = 0  
 X\_resolution = 0.57277737[Hz]  
 X\_sweep = 9.38438438[kHz]  
 Irr\_domain = 1H  
 Irr\_freq = 500.15991521[MHz]  
 Irr\_offset = 5.0[ppm]  
 Tri\_domain = 1H  
 Tri\_freq = 500.15991521[MHz]  
 Tri\_offset = 5.0[ppm]  
 Clipped = FALSE  
 Mod\_return = 1  
 Scans = 7  
 Total\_scans = 7  
 X\_90\_width = 12.54[us]  
 X\_acq\_time = 1.74587904[s]  
 X\_angle = 45[deg]  
 X\_atn = 4[db]  
 X\_pulse = 6.27[us]  
 Irr\_mode = Off  
 Tri\_mode = Off  
 Dante\_presat = FALSE  
 Initial\_wait = 1[s]  
 Recvr\_gain = 42  
 Relaxation\_delay = 10[s]  
 Repetition\_time = 11.74587904[s]  
 Temp\_get = 22[dc]

0.34

1

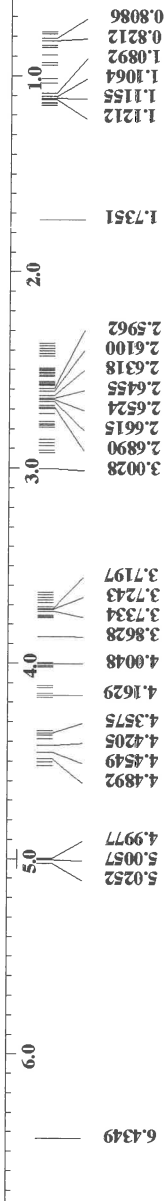

X : parts per Million : 1H

12A

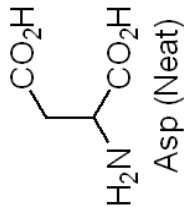

Filename = SBASPCN-2.jdf  
 Author = delta  
 Experiment = single\_pulse\_dec  
 Sample\_id = S#483593  
 Solvent = D2O  
 Creation\_time = 24-SEP-2015 02:17:04  
 Revision\_time = 23-SEP-2015 13:33:04  
 Current\_time = 23-SEP-2015 13:33:16  
 Comment = single pulse decouple  
 Data\_format = 1D COMPLEX  
 Dim\_size = 26214  
 Dim\_title = 13C  
 Dim\_units = [ppm]  
 Dimensions = X  
 Site = ECA 500  
 Spectrometer = JNM-ECA500  
 Field\_strength = 11.7473579[T] (500[MH  
 X\_acq\_duration = 0.83361792[s]  
 X\_domain = 13C  
 X\_freq = 125.76529768[MHz]  
 X\_offset = 100[ppm]  
 X\_points = 32768  
 X\_prescans = 4  
 X\_resolution = 1.19959034[Hz]  
 X\_sweep = 39.3081761[kHz]  
 Irr\_domain = 1H  
 Irr\_freq = 500.15991521[MHz]  
 Irr\_offset = 5.0[ppm]  
 Clipped = FALSE  
 Mod\_return = 10  
 Scans = 430  
 Total\_scans = 430  
 X\_90\_width = 10.73[us]  
 X\_acq\_time = 0.83361792[s]  
 X\_angle = 30[deg]  
 X\_atn = 9[db]  
 X\_pulse = 3.57666667[us]  
 Irr\_atn\_dec = 20[db]  
 Irr\_atn\_noe = 20[db]  
 Irr\_noise = WALTZ  
 Decoupling = TRUE  
 Initial\_wait = 1[s]  
 Noe = TRUE  
 Noe\_time = 0.1[s]  
 Recvr\_gain = 50  
 Relaxation\_delay = 0.1[s]  
 Repetition\_time = 0.93361792[s]  
 Temp\_get = 22.5[dc]

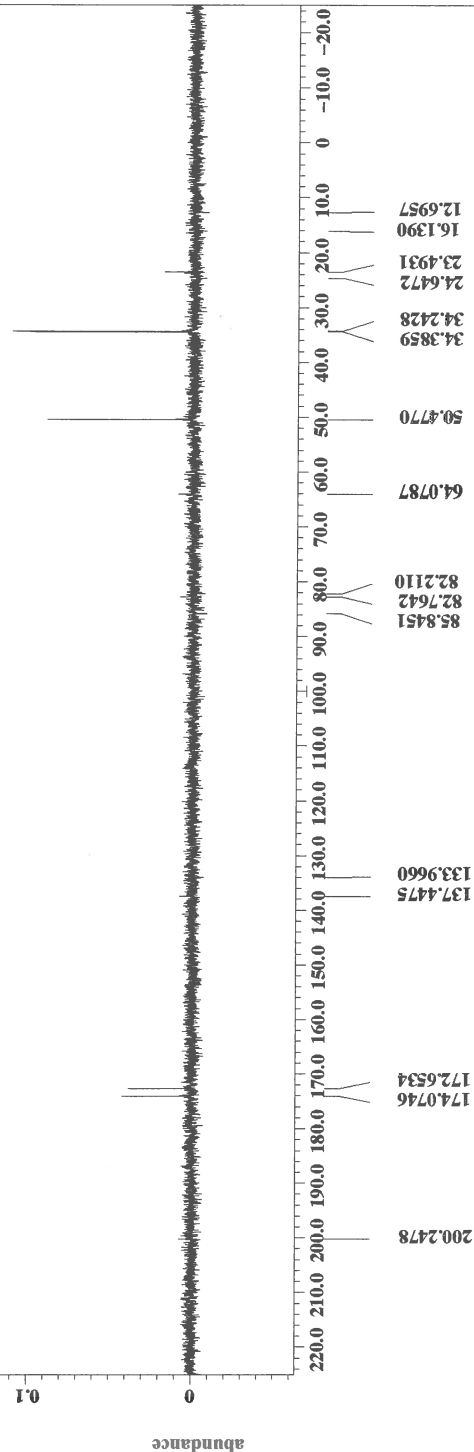

X : parts per Million : 13C

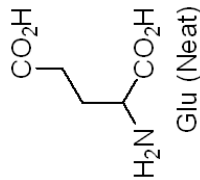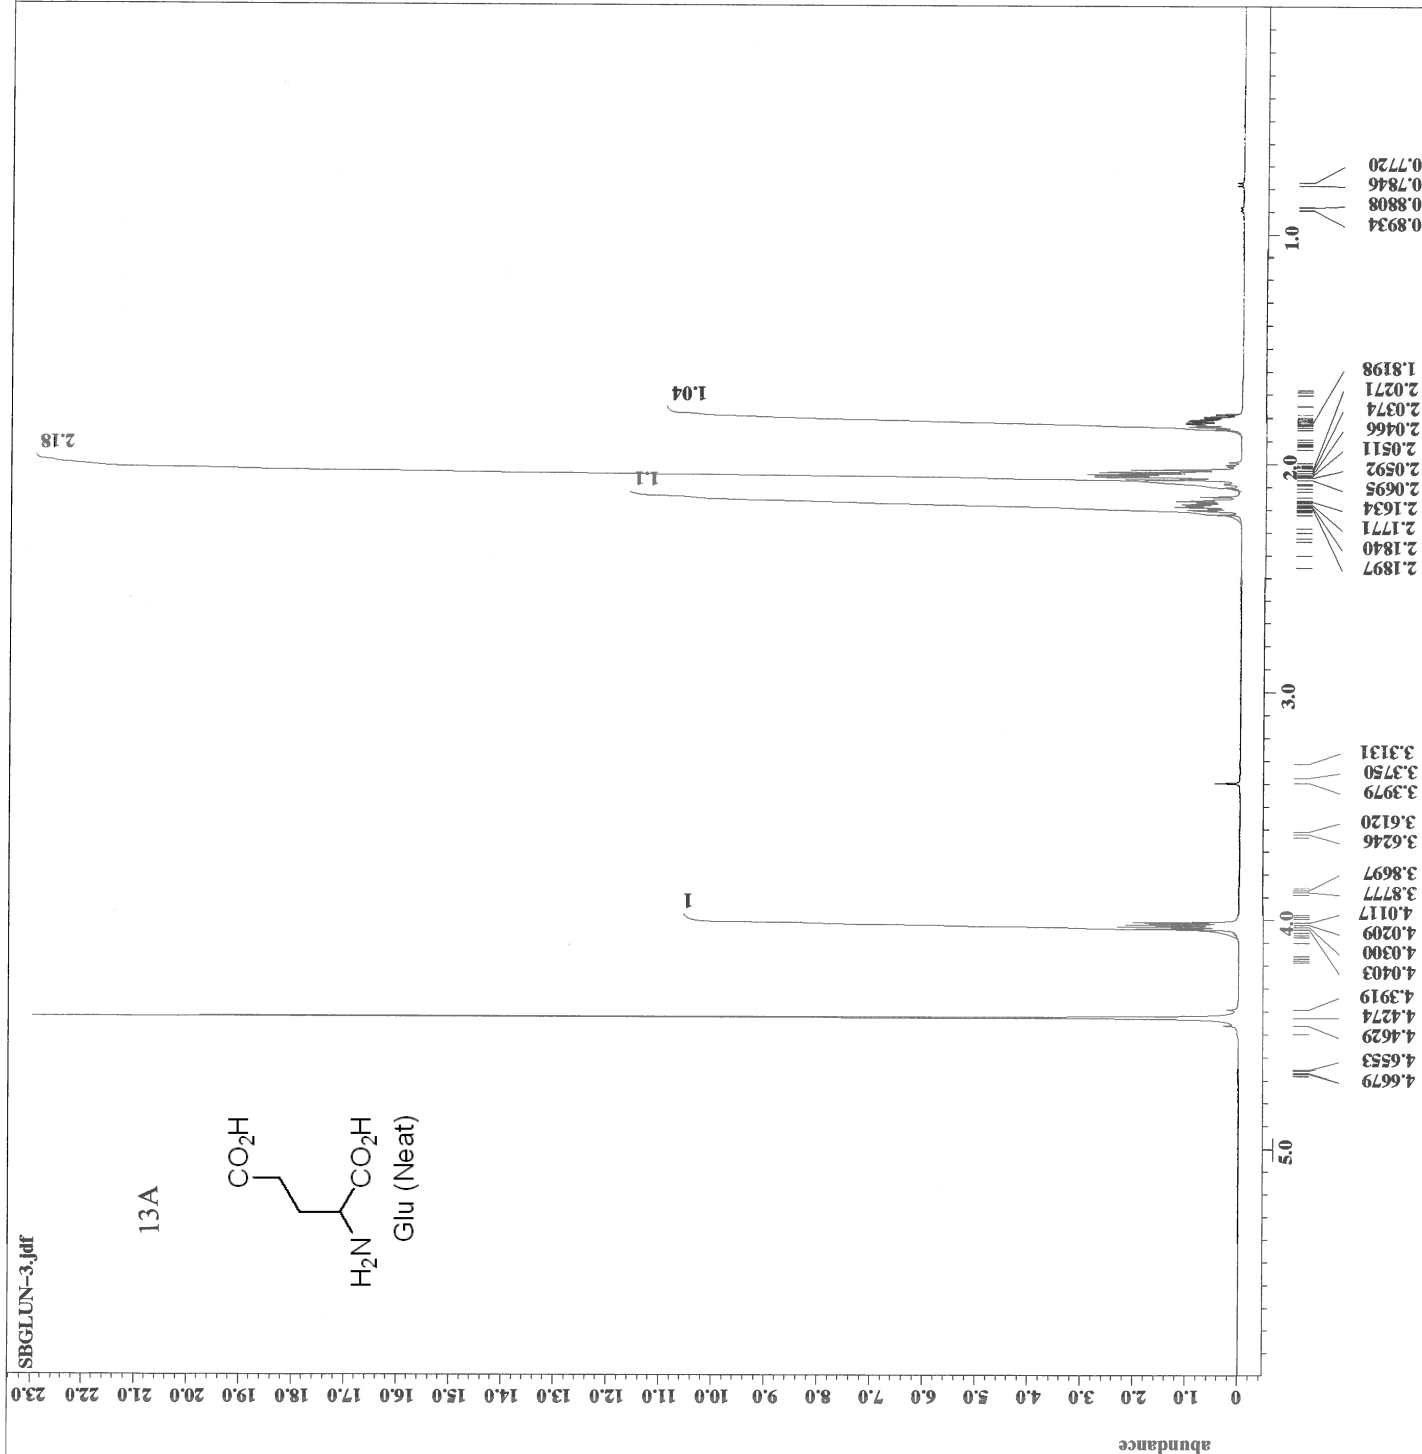

X : parts per Million : 1H

|                  |   |                       |
|------------------|---|-----------------------|
| Filename         | = | SRGJUN-3_jdf          |
| Author           | = | delta                 |
| Experiment       | = | single_pulse.ex2      |
| sample_id        | = | S#715952              |
| Solvent          | = | D2O                   |
| Creation_time    | = | 24-SEP-2015 08:40:44  |
| Revision_time    | = | 23-SEP-2015 19:57:41  |
| Current_time     | = | 23-SEP-2015 19:58:39  |
| Comment          | = | single_pulse          |
| Data_format      | = | 1D COMPLEX            |
| Dim_size         | = | 13107                 |
| Dim_title        | = | 1H                    |
| Dim_units        | = | [ppm]                 |
| Dimensions       | = | X                     |
| Site             | = | ECA 500               |
| Spectrometer     | = | JNM-ECA500            |
| Field_strength   | = | 11.7473579[T] (500[MH |
| X_acq_duration   | = | 1.74587904[s]         |
| X_domain         | = | 1H                    |
| X_freq           | = | 500.15991521[MHz]     |
| X_offset         | = | 5.0[ppm]              |
| X_points         | = | 16384                 |
| X_prescans       | = | 0                     |
| X_resolution     | = | 0.57277737[kHz]       |
| X_sweep          | = | 1H                    |
| irr_domain       | = | 9.38438438[kHz]       |
| irr_freq         | = | 500.15991521[MHz]     |
| irr_offset       | = | 5.0[ppm]              |
| Tri_domain       | = | 1H                    |
| Tri_freq         | = | 500.15991521[MHz]     |
| Tri_offset       | = | 5.0[ppm]              |
| Clipped          | = | FALSE                 |
| Mod_return       | = | 1                     |
| Scans            | = | 11                    |
| Total_scans      | = | 11                    |
| X_90_width       | = | 12.54[us]             |
| X_acq_time       | = | 1.74587904[s]         |
| X_angle          | = | 45[deg]               |
| X_atn            | = | 4[dB]                 |
| X_pulse          | = | 6.27[us]              |
| irr_mode         | = | Off                   |
| irr_tune         | = | Off                   |
| Tri_mode         | = | Off                   |
| Dante_preset     | = | FALSE                 |
| Initial_wait     | = | 1[s]                  |
| Recvr_gain       | = | 38                    |
| Relaxation_delay | = | 10[s]                 |
| Repetition_time  | = | 11.74587904[s]        |
| Temp_get         | = | 21.91[degC]           |

13A

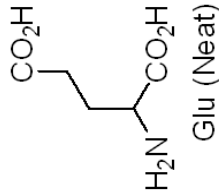

Filename = SBGLUCN-2.jdf  
Author = delta  
Experiment = single\_pulse\_dec  
Sample\_id = S#720106  
Solvent = D2O  
Creation\_time = 24-SEP-2015 08:50:35  
Revision\_time = 23-SEP-2015 20:06:52  
Current\_time = 23-SEP-2015 20:08:52  
Comment = single pulse decouple  
Data\_format = 1D COMPLEX  
Dim\_size = 26214  
Dim\_title = 13C  
Dim\_units = [ppm]  
Dimensions = x  
Site = ECA 500  
Spectrometer = JNM-ECA500  
Field\_strength = 11.7473579[T] (500[MH  
X\_acq\_duration = 0.83361792[s]  
X\_domain = 13C  
X\_freq = 125.76529768[MHz]  
X\_offset = 100[ppm]  
X\_points = 32768  
X\_prescans = 4  
X\_resolution = 1.19959034[Hz]  
X\_sweep = 39.3081761[kHz]  
Irr\_domain = 1H  
Irr\_freq = 500.15991521[MHz]  
Irr\_offset = 5.0[ppm]  
Clipped = FALSE  
Mod\_return = 10  
Scans = 350  
Total\_scans = 350  
X\_90\_width = 10.73[us]  
X\_acq\_time = 0.83361792[s]  
X\_angle = 30[deg]  
X\_atn = 9[db]  
X\_pulse = 3.57666667[us]  
Irr\_atn\_dec = 20[db]  
Irr\_atn\_noe = 20[db]  
Irr\_noise = WALYZ  
Decoupling = TRUE  
Initial\_wait = 1[s]  
Noe = TRUE  
Noe\_time = 0.2[s]  
Recvr\_gain = 50  
Relaxation\_delay = 0.2[s]  
Repetition\_time = 1.03361792[s]  
Temp\_get = 22.4[dc]

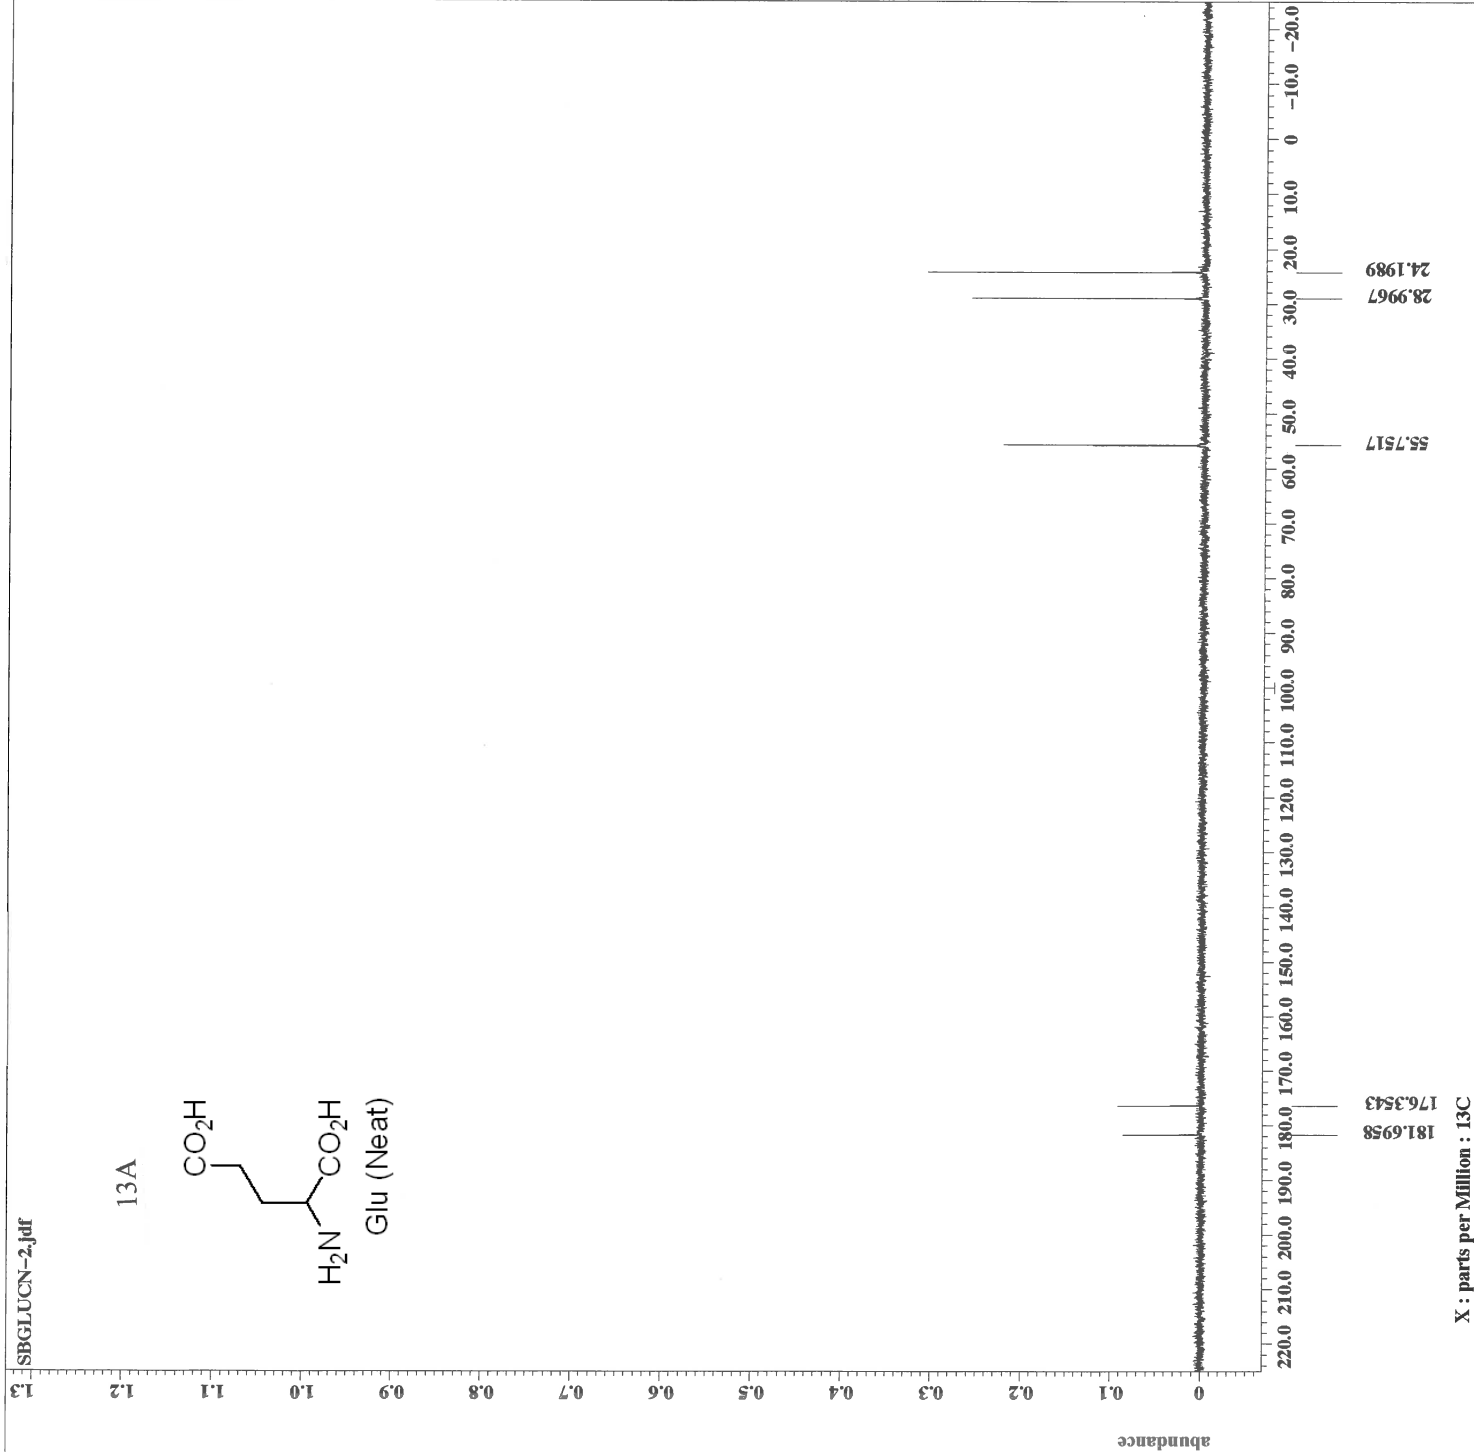



1B

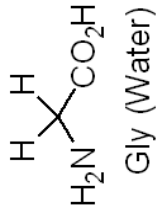

```

Filename      = SBGLW-3.jdf
Author       = Delta
Experiment   = single_pulse.ex2
Sample_id    = S#356998
Solvent      = D2O
Creation_time = 5-SEP-2015 22:41:36
Revision_time = 5-SEP-2015 10:00:29
Current_time  = 5-SEP-2015 10:02:25

Comment      = single_pulse
Data_format  = 1D COMPLEX
Dim_size     = 13107
Dim_title    = 1H
Dim_units    = [ppm]
Dimensions   = X
Site         = ECA 500
Spectrometer = JNM-ECA500

Field_strength
X_acq_duration = 11.7473579[T] (500[MH
X_domain       = 1H
X_freq         = 500.15991521[MHz]
X_offset       = 5.0[ppm]
X_points       = 16384
X_prescans     = 0
X_resolution   = 0.57277737[Hz]
X_sweep        = 9.38438438[kHz]
X_domain       = 1H
X_freq         = 500.15991521[MHz]
X_offset       = 5.0[ppm]
X_domain       = 1H
X_freq         = 500.15991521[MHz]
X_offset       = 5.0[ppm]
Clipped        = FALSE
Mod_return     = 1
Scans          = 10
Total_scans    = 10

X_90_width     = 12.54[us]
X_acq_time     = 1.74587904[s]
X_angle        = 45[deg]
X_atn          = 4[db]
X_pulse        = 6.27[us]
Xirr_mode      = Off
Tri_mode       = Off
Dante_presat   = FALSE
Initial_wait   = 1[s]
Recvr_gain     = 40
Relaxation_delay = 10[s]
Repetition_time = 11.74587904[s]
Temp_get       = 21[dc]

```

abundance

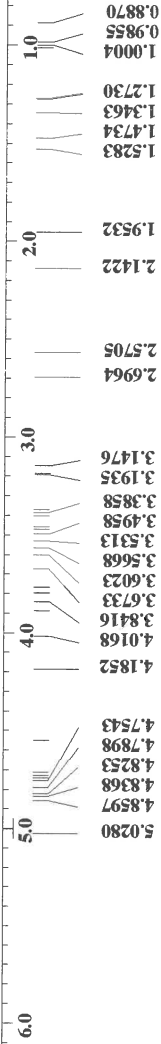

X : parts per Million : 1H

1B

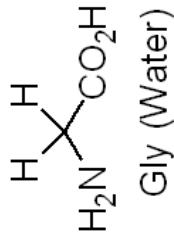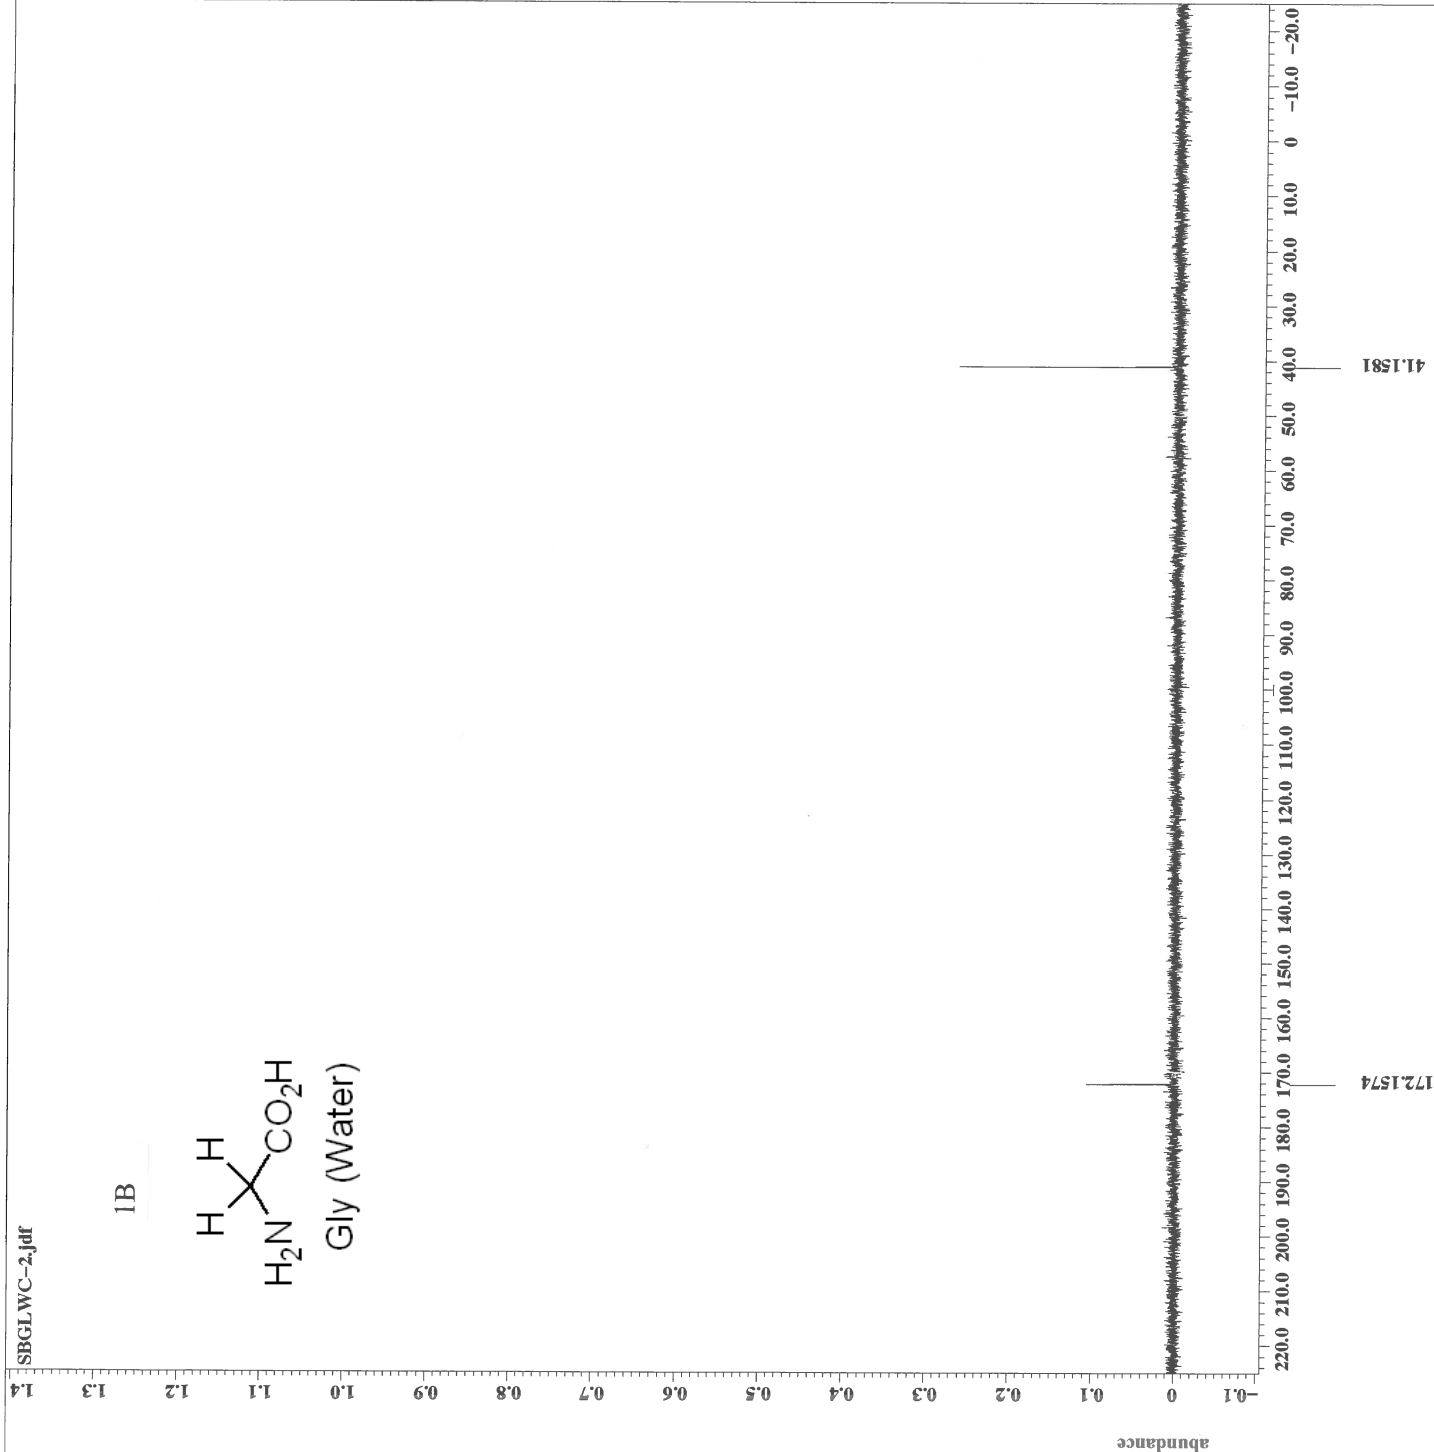

X : parts per Million : 13C

Filename = SBGLWC-2.jdf  
Author = delta  
Experiment = single\_pulse\_dec  
Sample\_id = S#359532  
Solvent = D2O  
Creation\_time = 5-SEP-2015 22:49:11  
Revision\_time = 5-SEP-2015 10:05:57  
Current\_time = 5-SEP-2015 10:06:07  
Comment = single pulse decouple  
Data\_format = 1D COMPLEX  
Dim\_size = 26214  
Dim\_title = 13C  
Dim\_units = [ppm]  
Dimensions = X  
Site = ECA 500  
Spectrometer = JNM-ECA500  
Field\_strength = 11.7473579[T] (500[MH  
X\_acq\_duration = 0.83361792[s]  
X\_domain = 13C  
X\_freq = 125.76529768[MHz]  
X\_offset = 100[ppm]  
X\_points = 32768  
X\_prescans = 4  
X\_resolution = 1.19959034[Hz]  
X\_sweep = 39.3081761[kHz]  
Irr\_domain = 1W  
Irr\_freq = 500.15991521[MHz]  
Irr\_offset = 5.0[ppm]  
Clipped = FALSE  
Mod\_return = 10  
Scans = 130  
Total\_scans = 130  
X\_90\_width = 10.73[us]  
X\_acq\_time = 0.83361792[s]  
X\_angle = 30[deg]  
X\_atn = 9[db]  
X\_pulse = 3.57666667[us]  
Irr\_atn\_dec = 20[db]  
Irr\_atn\_noe = 20[db]  
Irr\_noise = WALTZ  
Decoupling = TRUE  
Initial\_wait = 1[s]  
Noe = TRUE  
Noe\_time = 2[s]  
Recvr\_gain = 50  
Relaxation\_delay = 2[s]  
Repetition\_time = 2.83361792[s]  
Temp\_get = 21.5[dc]

2B

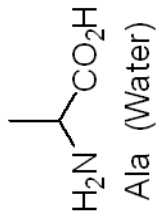

3.17

Filename = SBALW-4.jdf  
 Author = Delta  
 Experiment = single pulse.ex2  
 Sample id = S#346045  
 Solvent = D2O  
 Creation\_time = 7-SEP-2015 22:23:24  
 Revision\_time = 7-SEP-2015 09:43:11  
 Current\_time = 7-SEP-2015 09:43:12  
 Comment = single pulse  
 Data\_format = 1D COMPLEX  
 Dim\_size = 13107  
 Dim\_title = 1H  
 Dim\_units = [ppm]  
 Dimensions = X  
 Site = ECA 500  
 Spectrometer = JNM-ECA500  
 Field\_strength = 11.7473579[T] (500[MH  
 X\_acq\_duration = 1.74587904[s]  
 X\_domain = 1H  
 X\_freq = 500.15991521[MHz]  
 X\_offset = 5.0[ppm]  
 X\_points = 16384  
 X\_prescans = 0  
 X\_resolution = 0.57277737[Hz]  
 X\_sweep = 9.38438438[kHz]  
 Irr\_domain = 1H  
 Irr\_freq = 500.15991521[MHz]  
 Irr\_offset = 5.0[ppm]  
 Tri\_domain = 1H  
 Tri\_freq = 500.15991521[MHz]  
 Tri\_offset = 5.0[ppm]  
 Clipped = FALSE  
 Mod\_return = 1  
 Scans = 12  
 Total\_scans = 12  
 X\_90\_width = 12.54[us]  
 X\_acq\_time = 1.74587904[s]  
 X\_angle = 45[deg]  
 X\_atn = 4[dB]  
 X\_pulse = 6.27[us]  
 Irr\_mode = Off  
 Tri\_mode = Off  
 Dante\_presat = FALSE  
 Initial\_wait = 1[s]  
 Recvr\_gain = 46  
 Relaxation\_delay = 10[s]  
 Repetition\_time = 11.74587904[s]  
 Temp\_get = 21.3[DC]

abundance

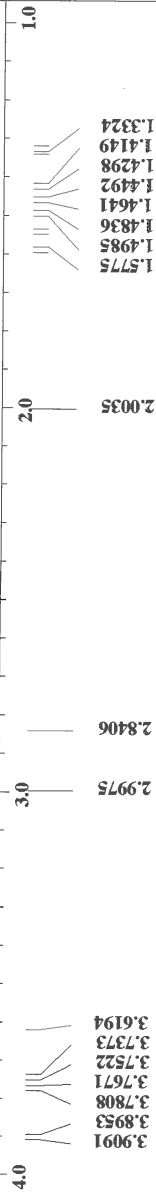

X : parts per Million : 1H

2B

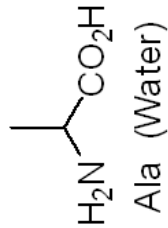

```

Filename = SBALWC-2.jdf
Author = delta
Experiment = single_pulse_dec
Sample_id = S4348239
Solvent = D2O
Creation_time = 7-SEP-2015 22:39:24
Revision_time = 7-SEP-2015 09:57:35
Current_time = 7-SEP-2015 09:57:47

Comment = single pulse decouple
Data_format = 1D COMPLEX
Dim_size = 26214
Dim_title = 13C
Dim_units = [ppm]
Dimensions = x
Site = ECA 500
Spectrometer = JNM-ECA500

Field_strength = 11.7473579[T] (500[MH
X_acq_duration = 0.83361792[s]
X_domain = 13C
X_freq = 125.76529768[MHz]
X_offset = 100[ppm]
X_points = 32768
X_prescans = 4
X_resolution = 1.19959034[Hz]
X_sweep = 39.3081761[KHz]
Irr_domain = 1H
Irr_freq = 500.15991521[MHz]
Irr_offset = 5.0[ppm]
Clipped = FALSE
Mod_return = 10
Scans = 320
Total_scans = 320

X_90_width = 10.73[us]
X_acq_time = 0.83361792[s]
X_angle = 30[deg]
X_atn = 9[db]
X_pulse = 3.57666667[us]
Irr_atn_dec = 20[db]
Irr_atn_noe = 20[db]
Irr_noise = WALTZ
Decoupling = TRUE
Initial_wait = 1[s]
Noe = TRUE
Noe_time = 2[s]
Recvr_gain = 50
Relaxation_delay = 2[s]
Repetition_time = 2.83361792[s]
Temp_get = 21.7[dc]

```

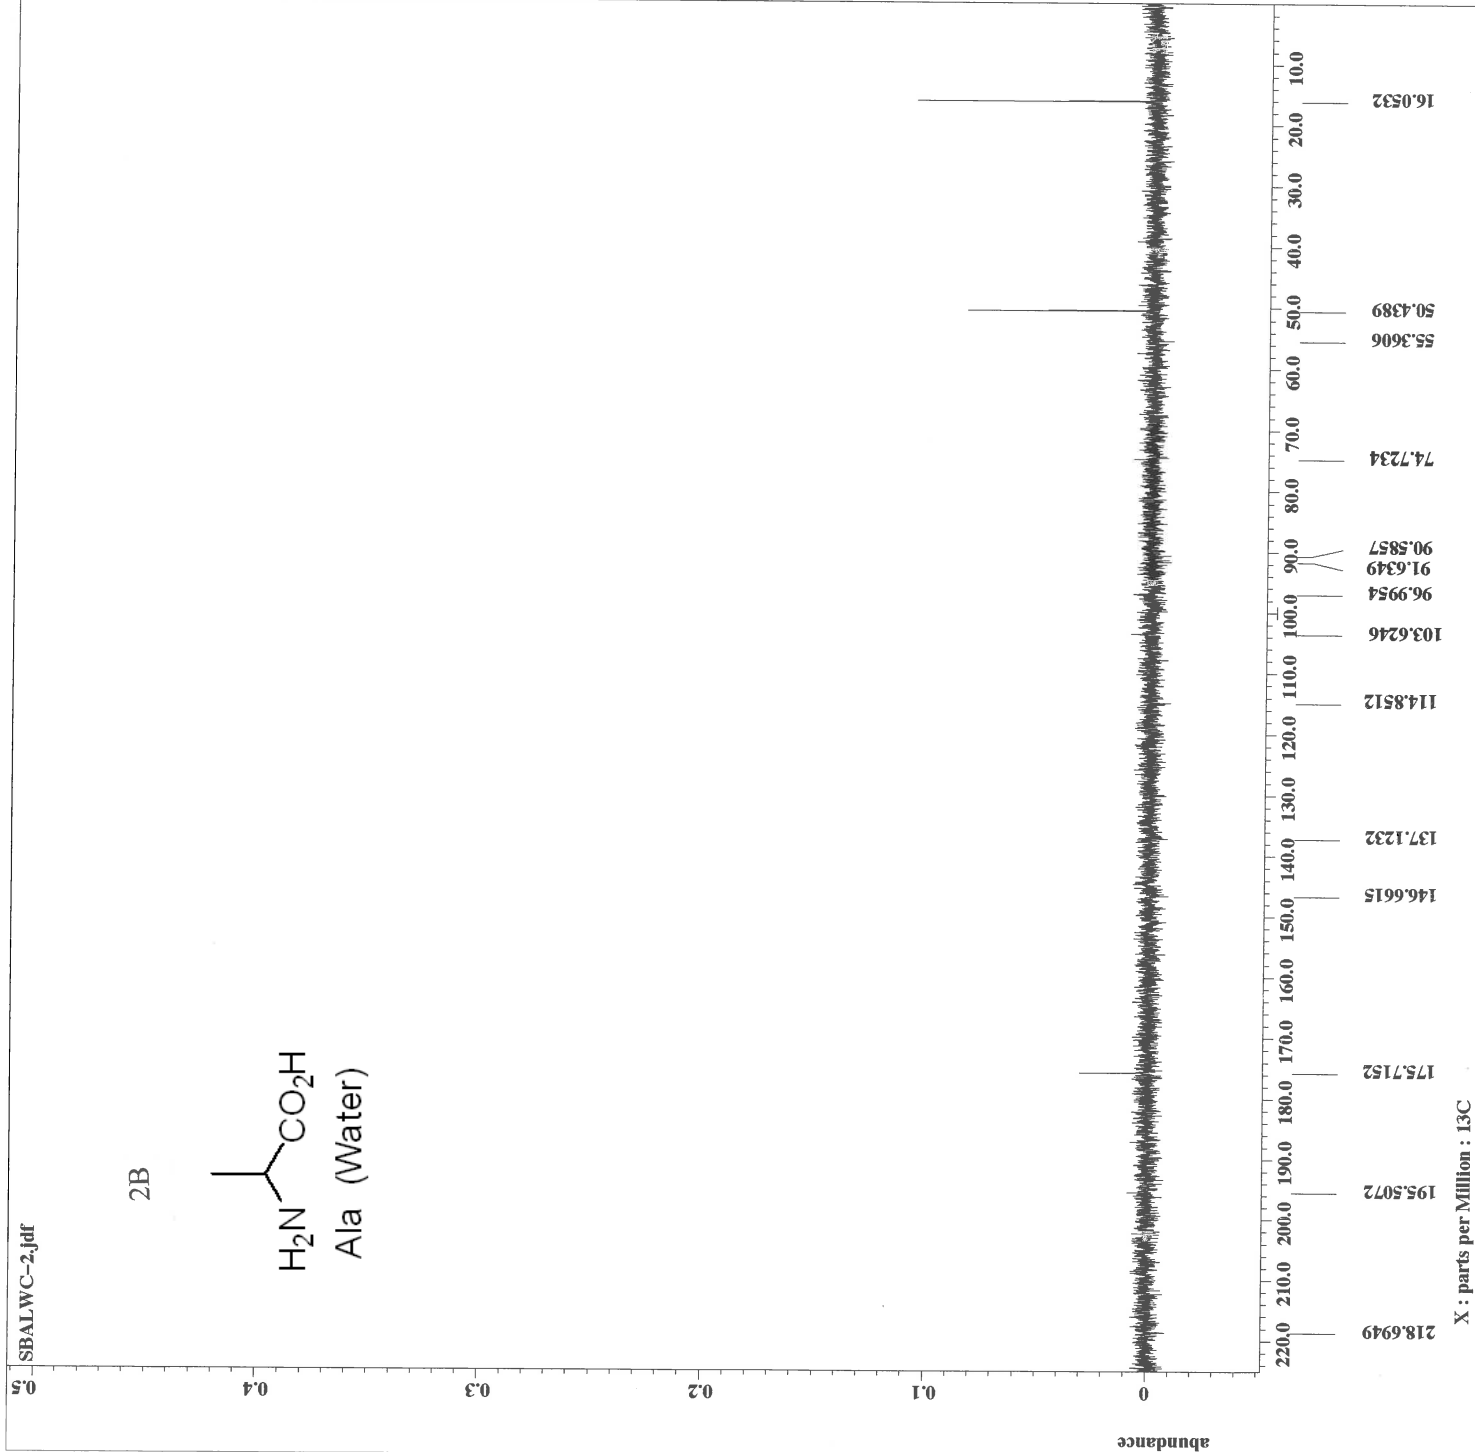

3B

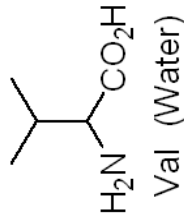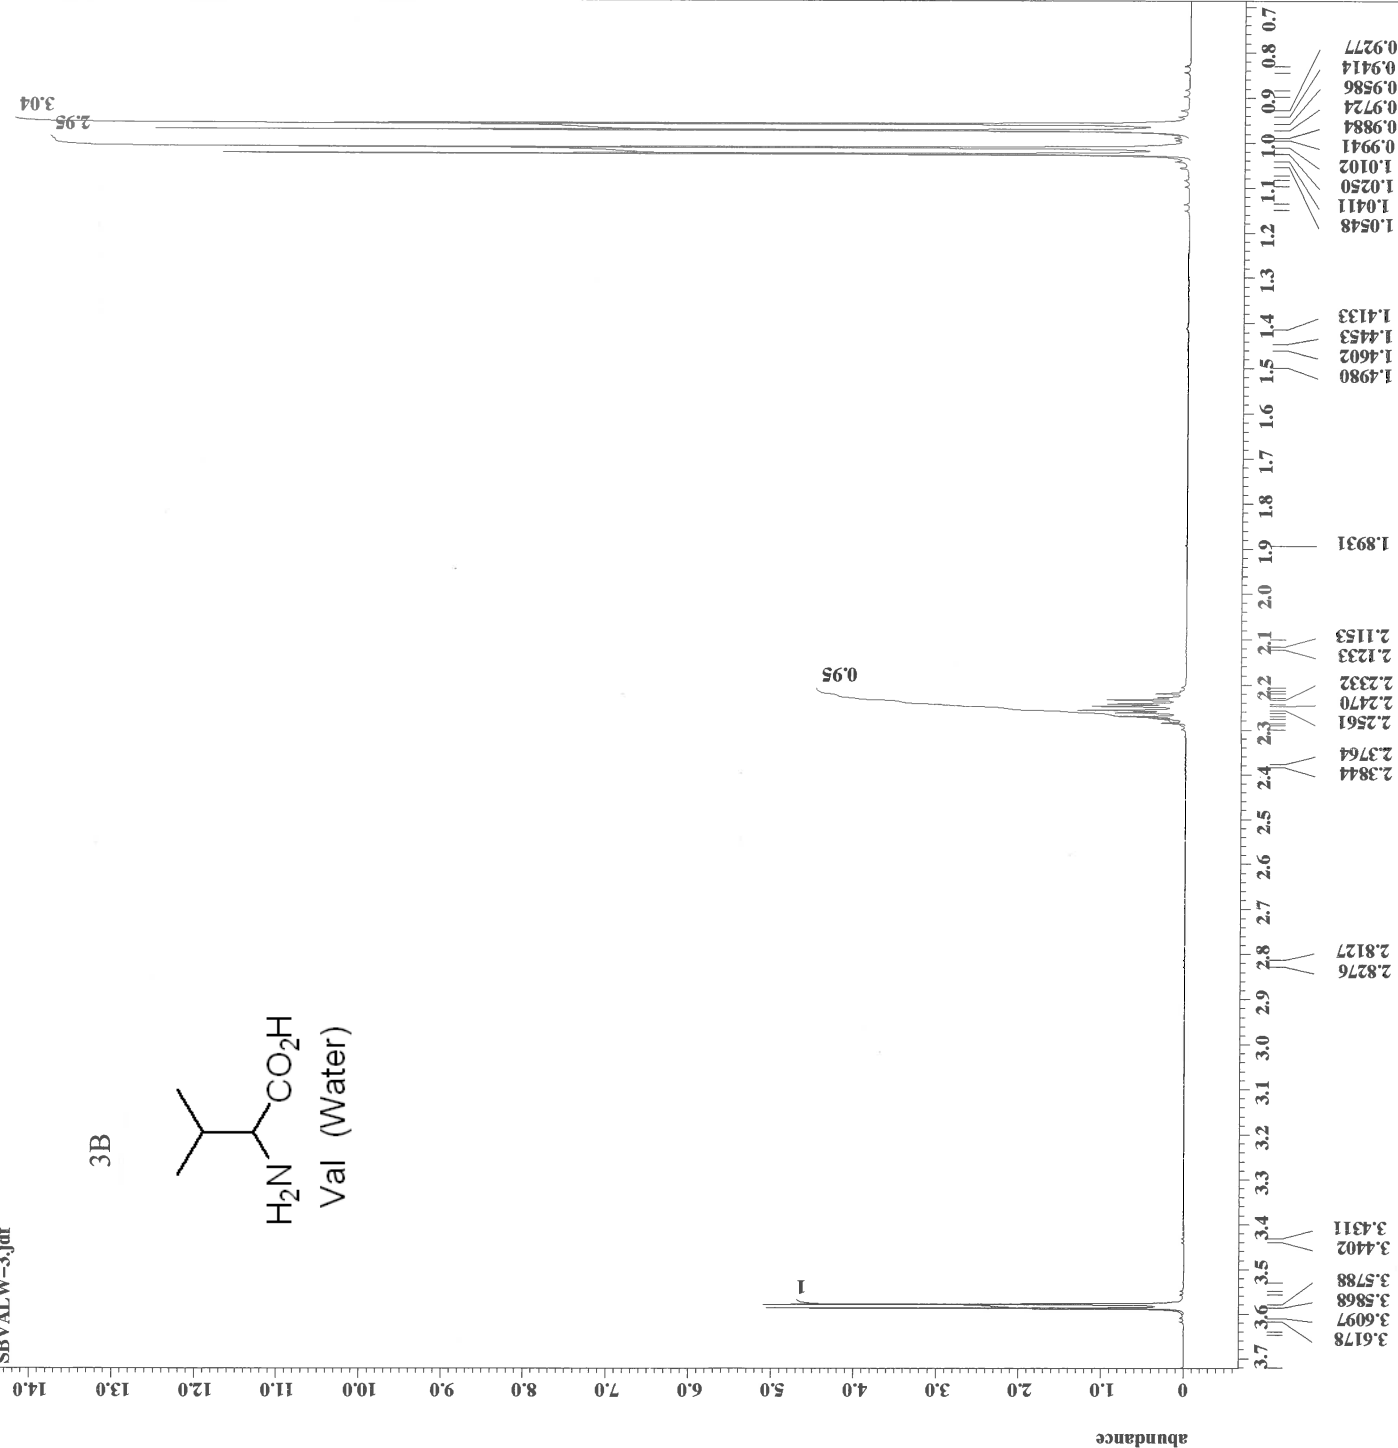

**X : parts per Million : 1H**

|                  |   |                       |
|------------------|---|-----------------------|
| Filename         | = | SEVALW-3_jdf          |
| Author           | = | delta                 |
| Experiment       | = | single_pulse.ex2      |
| Sample id        | = | S#344123              |
| Solvent          | = | D2O                   |
| Creation time    | = | 5-SEP-2015 22:20:08   |
| Revision time    | = | 5-SEP-2015 09:43:45   |
| Current_time     | = | 5-SEP-2015 09:44:35   |
| Comment          | = | single_pulse          |
| Data_format      | = | 1D COMPLEX            |
| Dlm_size         | = | 13107                 |
| Dlm_title        | = | 1H                    |
| Dlm_units        | = | [ppm]                 |
| Dimensions       | = | X                     |
| Site             | = | ECA 500               |
| Spectrometer     | = | JNM-ECA500            |
| Field_strength   | = | 11.7473579[T] (500[MH |
| X_acq_duration   | = | 1.74587904[s]         |
| X_domain         | = | 1H                    |
| X_freq           | = | 500.15991521[MHz]     |
| X_offset         | = | 5.0[ppm]              |
| X_points         | = | 1638#                 |
| X_prescans       | = | 0                     |
| X_resolution     | = | 0.57277737[Hz]        |
| X_sweep          | = | 1H                    |
| lrr_domain       | = | 9.38438438[kHz]       |
| lrr_freq         | = | 500.15991521[MHz]     |
| lrr_offset       | = | 5.0[ppm]              |
| Tri_domain       | = | 1H                    |
| Tri_freq         | = | 500.15991521[MHz]     |
| Tri_offset       | = | 5.0[ppm]              |
| Clipped          | = | FALSE                 |
| Mod_return       | = | 1                     |
| Scans            | = | 10                    |
| Total_scans      | = | 10                    |
| X_90_width       | = | 12.54[us]             |
| X_acq_time       | = | 1.74587904[s]         |
| X_angle          | = | 45[deg]               |
| X_atn            | = | 4[dB]                 |
| X_pulse          | = | 6.27[us]              |
| lrr_mode         | = | Off                   |
| lrr_mode         | = | Off                   |
| Tri_mode         | = | FALSE                 |
| Dante_presat     | = | 1[s]                  |
| Initial_wait     | = | 40                    |
| Recvr_gain       | = | 10[s]                 |
| Relaxation_delay | = | 11.74587904[s]        |
| Repetition_time  | = | 21.11[dc]             |
| Temp_get         | = |                       |

3B

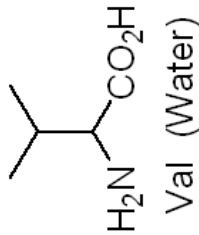

```

Filename      = SBVALCW-2.jdf
Author        = delta
Experiment    = single pulse_dec
Sample id     = S#346395
Solvent       = D2O
Creation_time = 5-SEP-2015 22:31:32
Revision_time = 5-SEP-2015 09:48:54
Current_time  = 5-SEP-2015 09:49:24

Comment       = single pulse decouple
Data format   = 1D COMPLEX
Dim_size      = 26214
Dim_title     = 13C
Dim_units     = [ppm]
Dimensions    = X
Site          = ECA 500
Spectrometer  = JNM-ECA500

Field_strength = 11.7473579[T] (500[MH
X_acq_duration = 0.83361792[s]
X_domain       = 13C
X_freq         = 125.76529768[MHz]
X_offset       = 100[ppm]
X_points       = 32768
X_prescans     = 4
X_resolution   = 1.19959034[Hz]
X_sweep        = 39.3081761[kHz]
Irr_domain     = 1H
Irr_freq       = 500.15991521[MHz]
Irr_offset     = 5.0[ppm]
Clipped        = FALSE
Mod_return     = 10
Scans          = 220
Total_scans    = 220

X_90_width     = 10.73[us]
X_acq_time     = 0.83361792[s]
X_angle        = 30[deg]
X_atn          = 9[db]
X_pulse        = 3.57666667[us]
Irr_atn_dec    = 20[db]
Irr_atn_noe    = 20[db]
Irr_noise      = WALTZ
Decoupling     = TRUE
Initial_wait   = 1[s]
Noe            = TRUE
Noe_time       = 2[s]
Recvr_gain     = 50
Relaxation_delay = 2[s]
Repetition_time = 2.83361792[s]
Temp_get       = 21.5[dC]

```

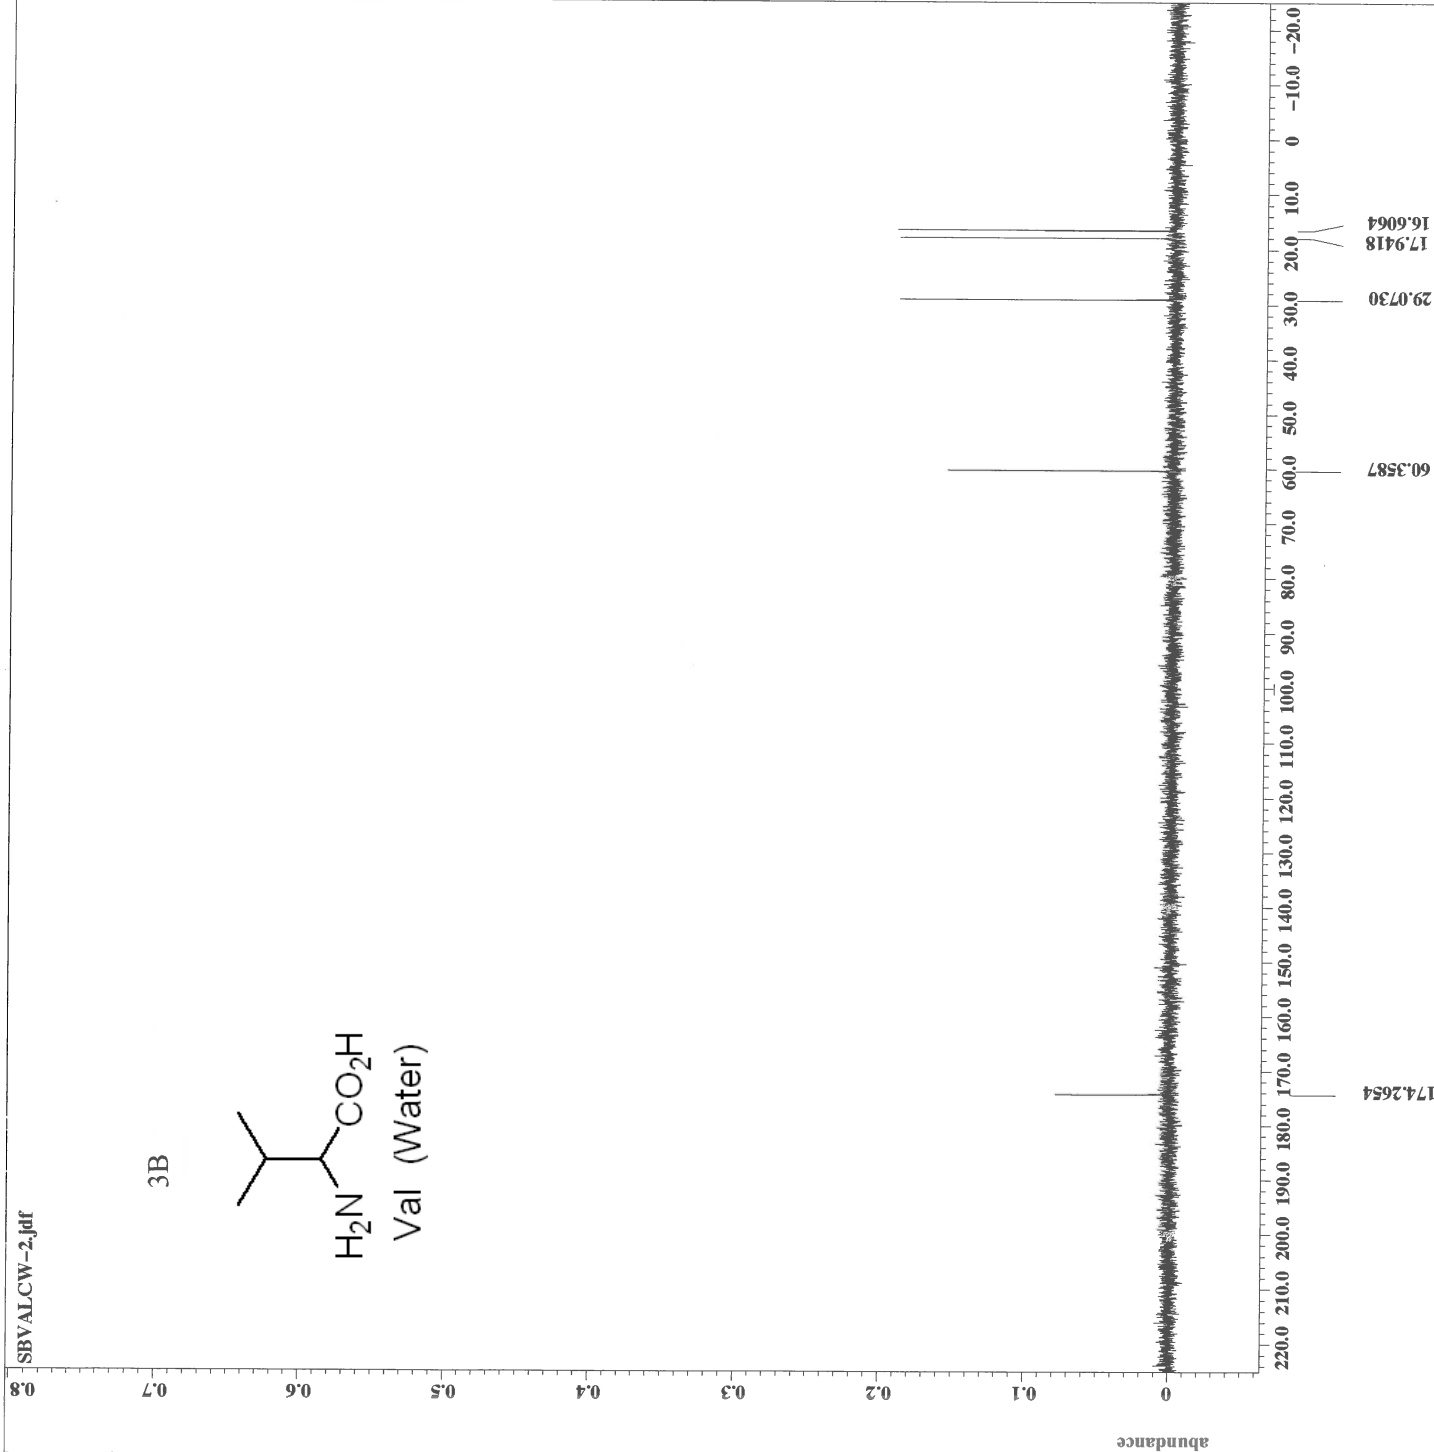

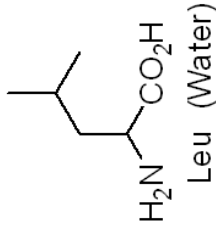

6.14

3.1

1

abundance

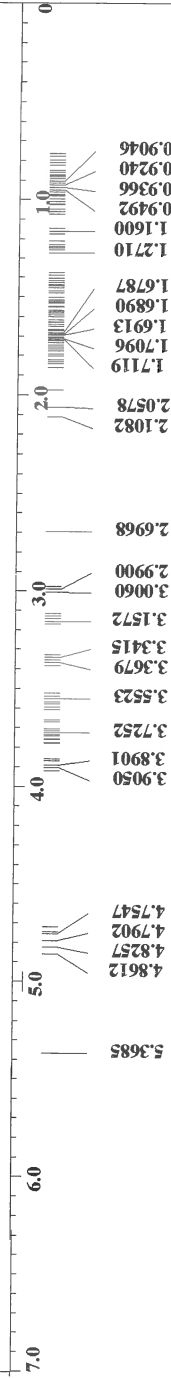

Filename = SBLEUW-3.jdf  
 Author = Delta  
 Experiment = single pulse.ex2  
 Sample\_id = S#685358  
 Solvent = D2O  
 Creation\_time = 9-SEP-2015 07:49:56  
 Revision\_time = 8-SEP-2015 19:10:20  
 Current\_time = 8-SEP-2015 19:10:57  
 Comment = single\_pulse  
 Data\_format = 1D COMPLEX  
 Dim\_size = 13107  
 Dim\_title = 1H  
 Dim\_units = [ppm]  
 Dimensions = X  
 Site = ECA 500  
 Spectrometer = JNM-ECA500  
 Field\_strength = 11.7473579[T] (500[MH  
 X\_acq\_duration = 1.74587904[s]  
 X\_domain = 1H  
 X\_freq = 500.15991521[MHz]  
 X\_offset = 5.0[ppm]  
 X\_points = 16384  
 X\_prescans = 0  
 X\_resolution = 0.57277737[Hz]  
 X\_sweep = 9.38438438[kHz]  
 Irr\_domain = 1H  
 Irr\_freq = 500.15991521[MHz]  
 Irr\_offset = 5.0[ppm]  
 Tri\_domain = 1H  
 Tri\_freq = 500.15991521[MHz]  
 Tri\_offset = 5.0[ppm]  
 Clipped = FALSE  
 Mod\_return = 1  
 Scans = 10  
 Total\_scans = 10  
 X\_90\_width = 12.54[us]  
 X\_acq\_time = 1.74587904[s]  
 X\_angle = 45[deg]  
 X\_atn = 4[db]  
 X\_pulse = 6.27[us]  
 Irr\_mode = Off  
 Tri\_mode = Off  
 Dante\_presat = FALSE  
 Initial\_wait = 1[s]  
 Recvr\_gain = 34  
 Relaxation\_delay = 10[s]  
 Repetition\_time = 11.74587904[s]  
 Temp\_get = 21.3[dc]

4B

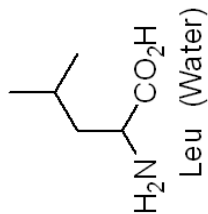

```

Filename = SBLEUWC-2.jdf
Author = delta
Experiment = single_pulse_dec
Sample_id = S#688161
Solvent = D2O
Creation_time = 9-SEP-2015 07:57:40
Revision_time = 8-SEP-2015 19:14:22
Current_time = 8-SEP-2015 19:14:59

Comment = single pulse decouple
Data_format = 1D COMPLEX
Dim_size = 26214
Dim_title = 13C
Dim_units = [ppm]
Dimensions = X
Site = ECA 500
Spectrometer = JNM-ECA500

Field_strength = 11.7473579[T] (500[MH
X_acq_duration = 0.83361792[s]
X_domain = 13C
X_freq = 125.76529768[MHz]
X_offset = 100[ppm]
X_points = 32768
X_prescans = 4
X_resolution = 1.19959034[Hz]
X_sweep = 39.3081761[kHz]
Irr_domain = 1H
Irr_freq = 500.15991521[MHz]
Irr_offset = 5.0[ppm]
Clipped = FALSE
Mod_return = 10
Scans = 310
Total_scans = 310

X_90_width = 10.73[us]
X_acq_time = 0.83361792[s]
X_angle = 30[deg]
X_atn = 9[db]
X_pulse = 3.57666667[us]
Irr_atn_dec = 20[db]
Irr_atn_noe = 20[db]
Irr_noise = WAITZ
Decoupling = TRUE
Initial_wait = 1[s]
Noe = TRUE
Noe_time = 0.5[s]
Recvr_gain = 50
Relaxation_delay = 0.5[s]
Repetition_time = 1.33361792[s]
Temp_get = 21.8[dc]
    
```

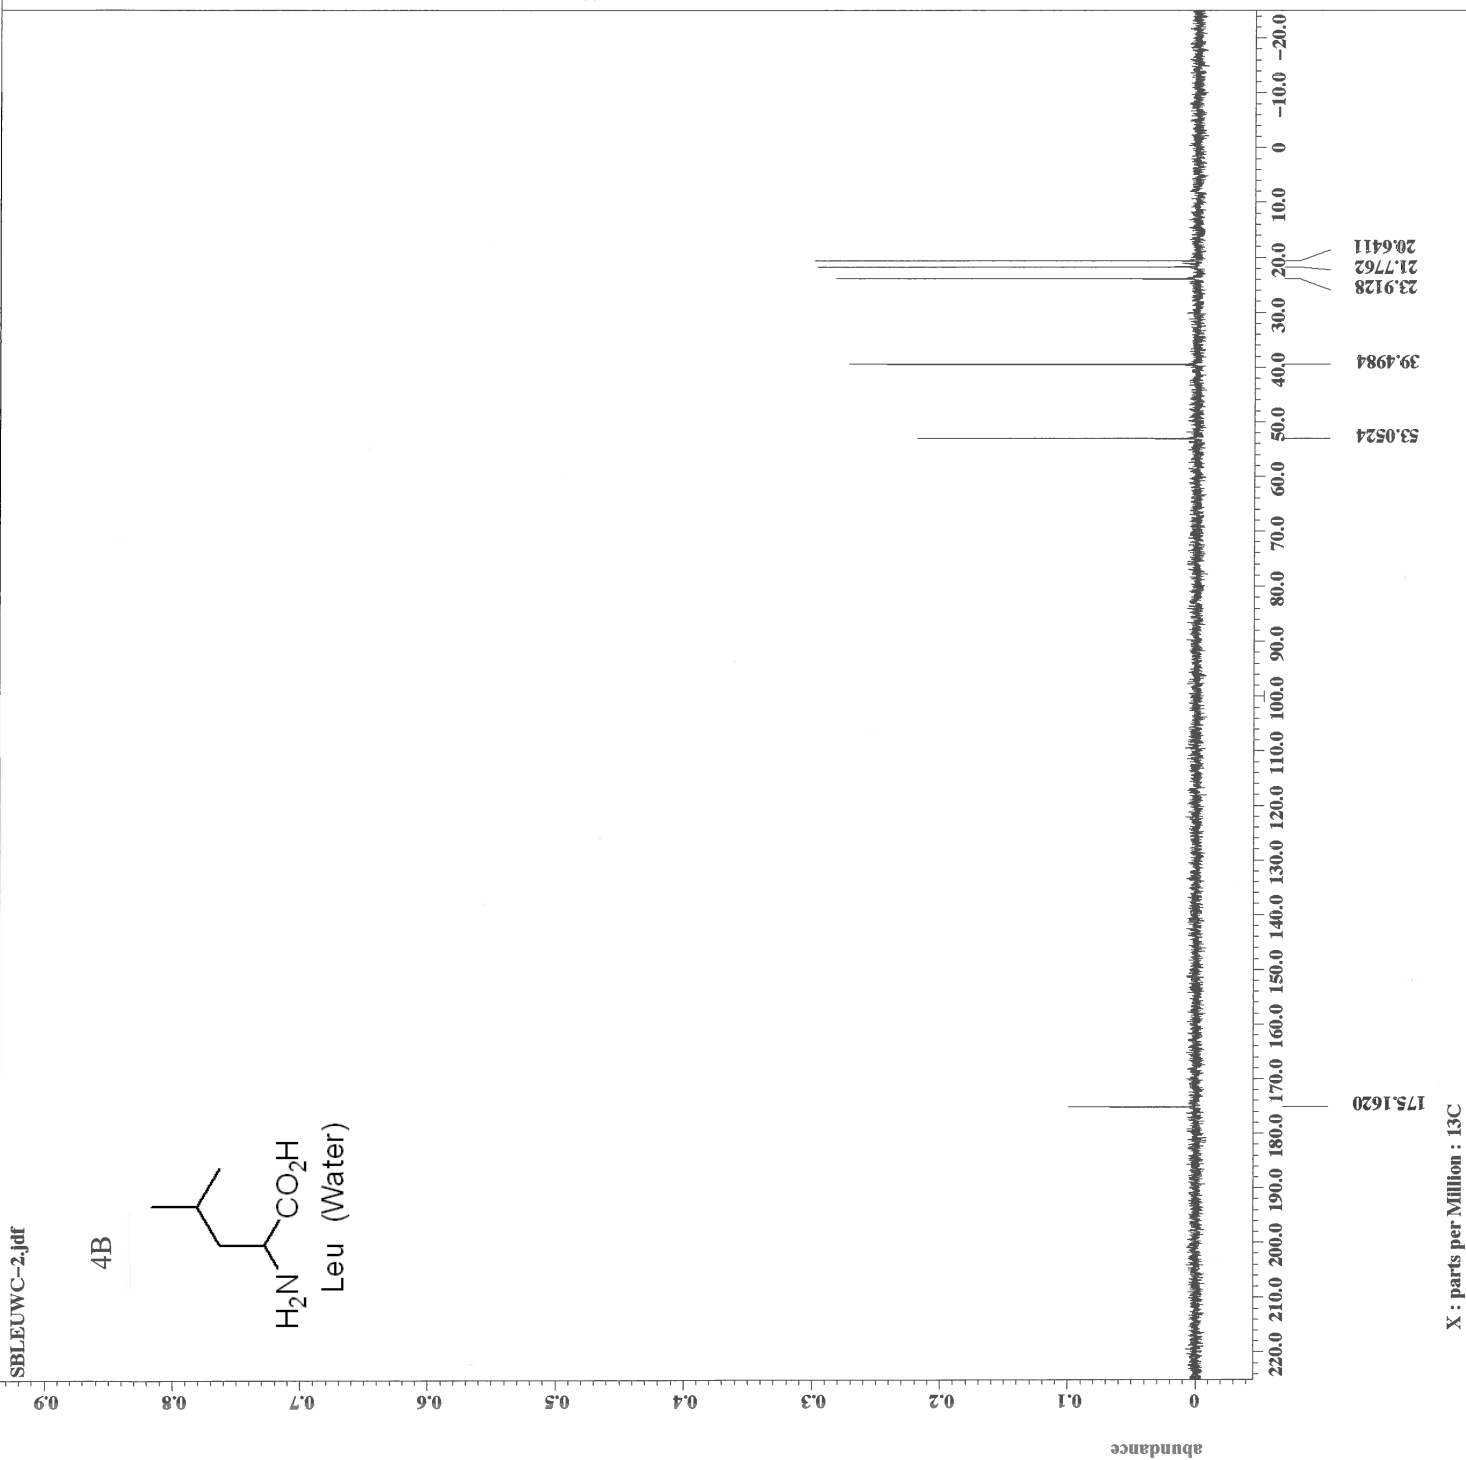

X : parts per Million : 13C



SBILW-3.jdf

5B

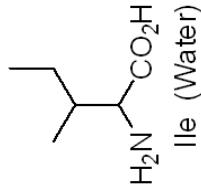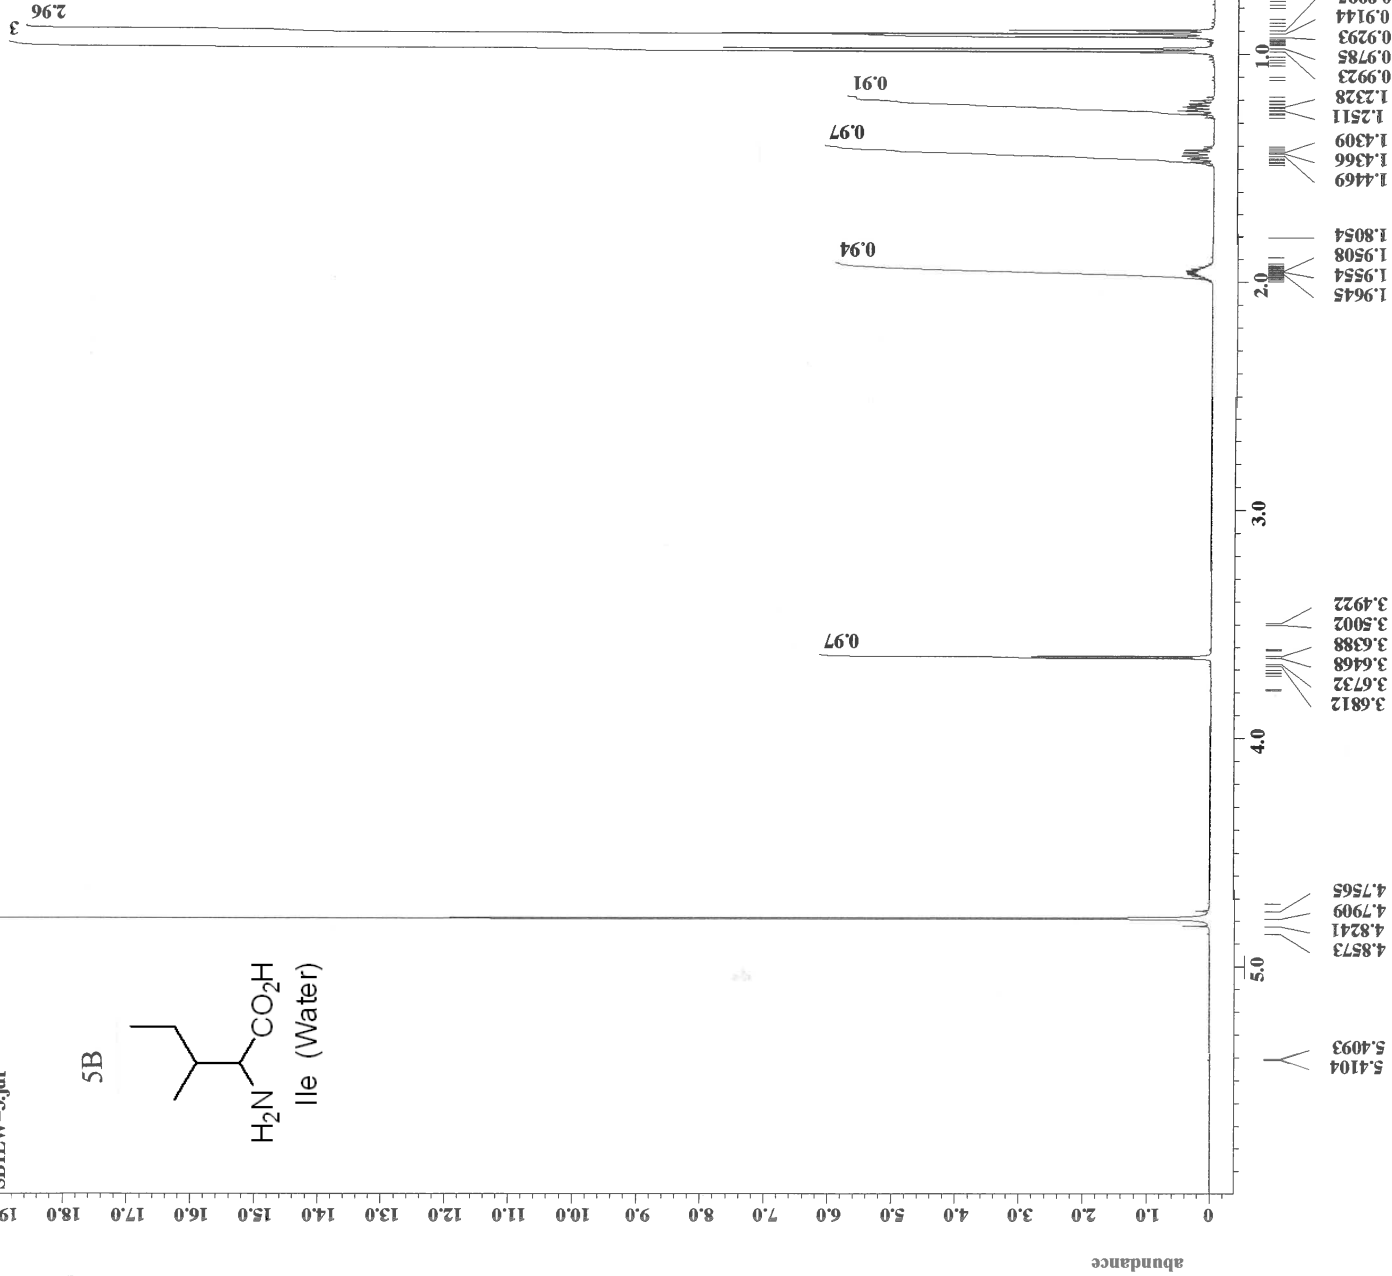

Filename = SBILW-3.jdf  
Author = deita  
Experiment = single\_pulse.ex2  
Sample\_id = S#640441  
Solvent = D2O  
Creation\_time = 8-SEP-2015 06:34:04  
Revision\_time = 7-SEP-2015 17:58:14  
Current\_time = 7-SEP-2015 17:58:59  
Comment = single\_pulse  
Data\_format = 1D COMPLEX  
Dim\_size = 13107  
Dim\_title = 1H  
Dim\_units = [ppm]  
Dimensions = X  
Site = ECA 500  
Spectrometer = JNM-ECA500  
Field\_strength = 11.7473579[T] (500[MH  
X\_acq\_duration = 1.74587904[s]  
X\_domain = 1H  
X\_freq = 500.15991521[MHz]  
X\_offset = 5.0[ppm]  
X\_points = 16384  
X\_prescans = 0  
X\_resolution = 0.57277737[Hz]  
X\_sweep = 9.38438438[kHz]  
Irr\_domain = 1H  
Irr\_freq = 500.15991521[MHz]  
Irr\_offset = 5.0[ppm]  
Tri\_domain = 1H  
Tri\_freq = 500.15991521[MHz]  
Tri\_offset = 5.0[ppm]  
Clipped = FALSE  
Mod\_return = 1  
Scans = 12  
Total\_scans = 12  
X\_90\_width = 12.54[us]  
X\_acq\_time = 1.74587904[s]  
X\_angle = 45[deg]  
X\_atn = 4[db]  
X\_pulse = 6.27[us]  
Irr\_mode = Off  
Tri\_mode = Off  
Dante\_presat = FALSE  
Initial\_wait = 1[s]  
Recvr\_gain = 46  
Relaxation\_delay = 10[s]  
Repetition\_time = 11.74587904[s]  
Temp\_get = 20.9[dc]

X : parts per Million : 1H

5B

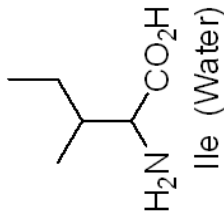

Filename = SB1LWC-2.jdf  
 Author = delta  
 Experiment = single pulse\_dec  
 Sample\_id = S#642712  
 Solvent = D2O  
 Creation\_time = 8-SEP-2015 06:50:00  
 Revision\_time = 7-SEP-2015 18:07:13  
 Current\_time = 7-SEP-2015 18:07:28  
 Comment = single pulse decouple  
 Data\_format = 1D COMPLEX  
 Dim\_size = 26214  
 Dim\_title = 13C  
 Dim\_units = [ppm]  
 Dimensions = X  
 Site = ECA 500  
 Spectrometer = JNM-ECA500  
 Field\_strength = 11.7473579[T] (500[MH  
 X\_acq\_duration = 0.83361792[s]  
 X\_domain = 13C  
 X\_freq = 125.76529768[MHz]  
 X\_offset = 100[ppm]  
 X\_points = 32768  
 X\_prescans = 4  
 X\_resolution = 1.19959034[Hz]  
 X\_sweep = 39.3081761[kHz]  
 Irr\_domain = 1H  
 Irr\_freq = 500.15991521[MHz]  
 Irr\_offset = 5.0[ppm]  
 Clipped = FALSE  
 Mod\_return = 10  
 Scans = 490  
 Total\_scans = 490  
 X\_90\_width = 10.73[us]  
 X\_acq\_time = 0.83361792[s]  
 X\_angle = 30[deg]  
 X\_atn = 9[db]  
 X\_pulse = 3.57666667[us]  
 Irr\_atn\_dec = 20[db]  
 Irr\_atn\_noe = 20[db]  
 Irr\_noise = WALYZ  
 Decoupling = TRUE  
 Initial\_wait = 1[s]  
 Noe = TRUE  
 Noe\_time = 1[s]  
 Recvr\_gain = 50  
 Relaxation\_delay = 1[s]  
 Repetition\_time = 1.83361792[s]  
 Temp\_get = 21.6[dc]

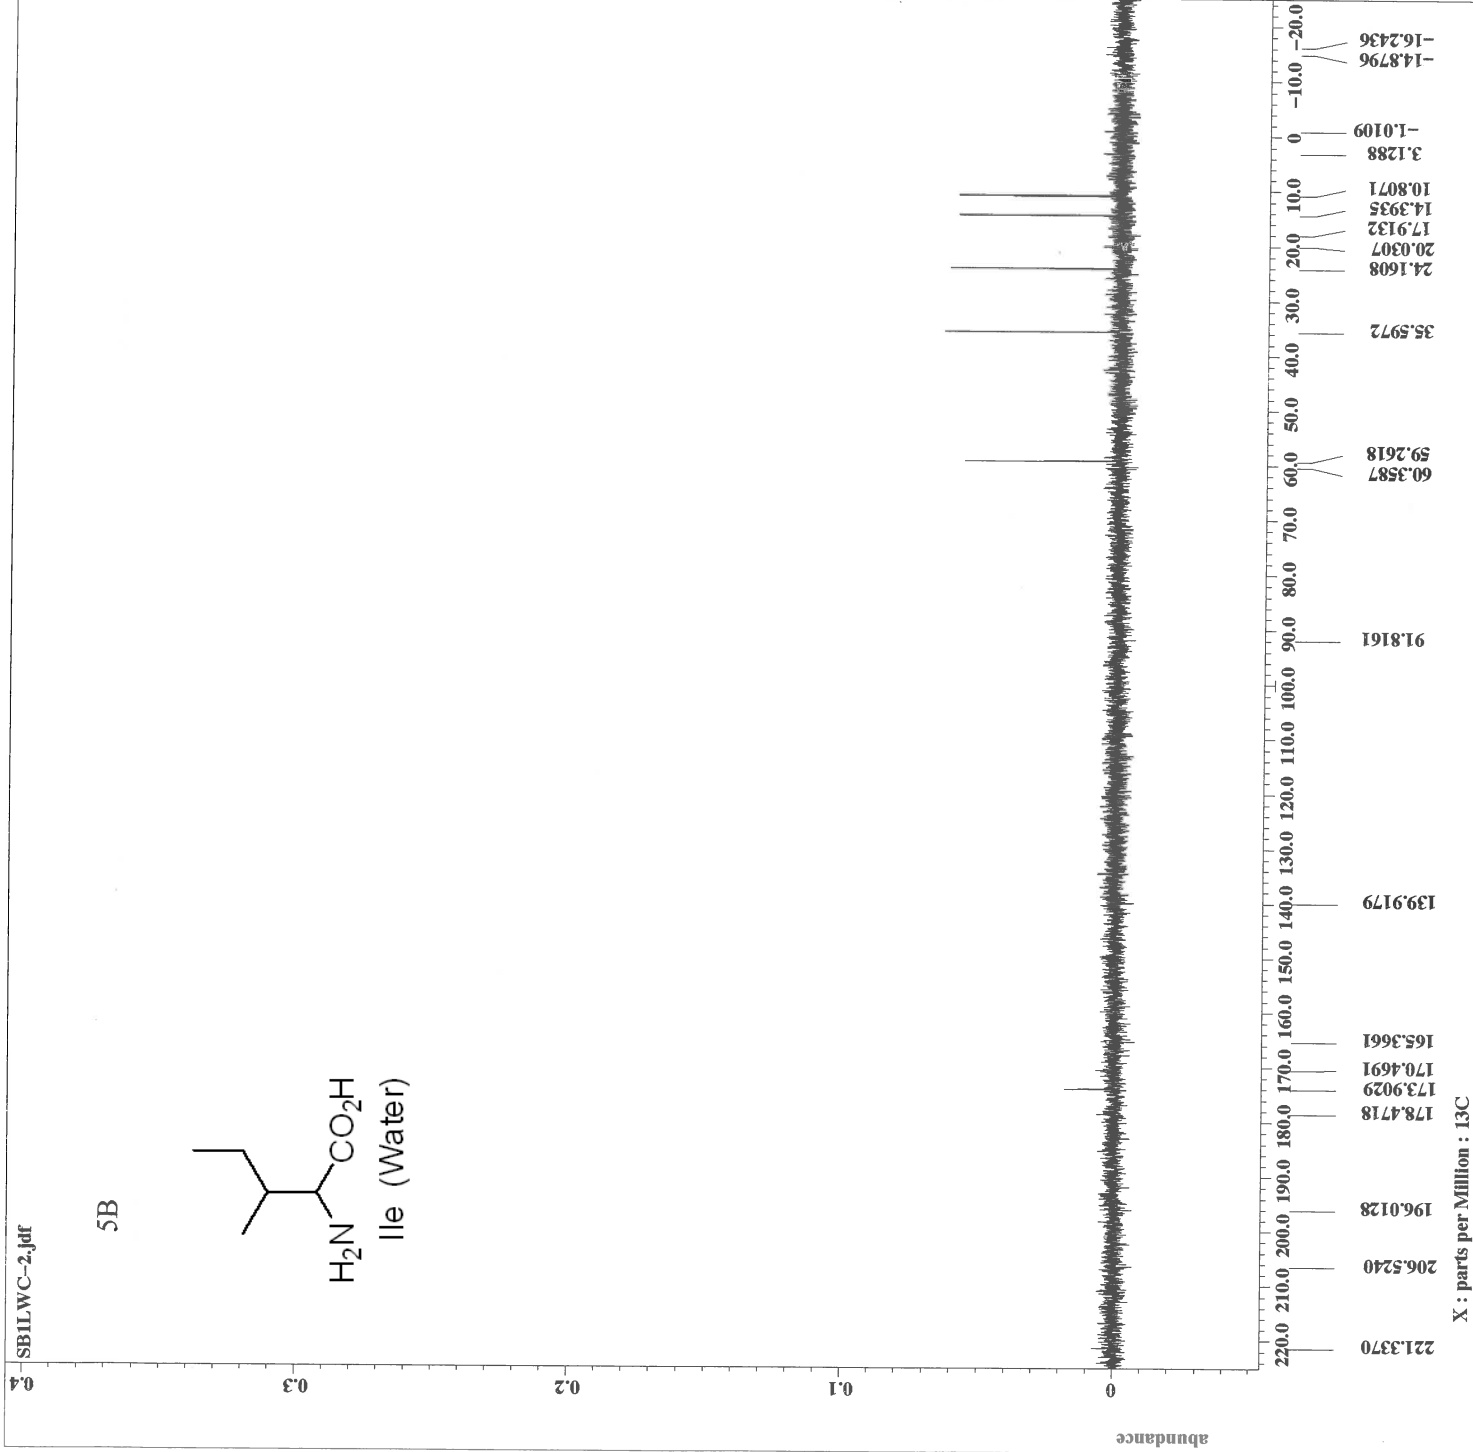

X : parts per Million : 13C

6B

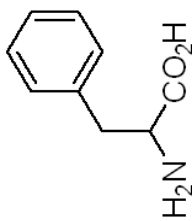

Phe (Water)

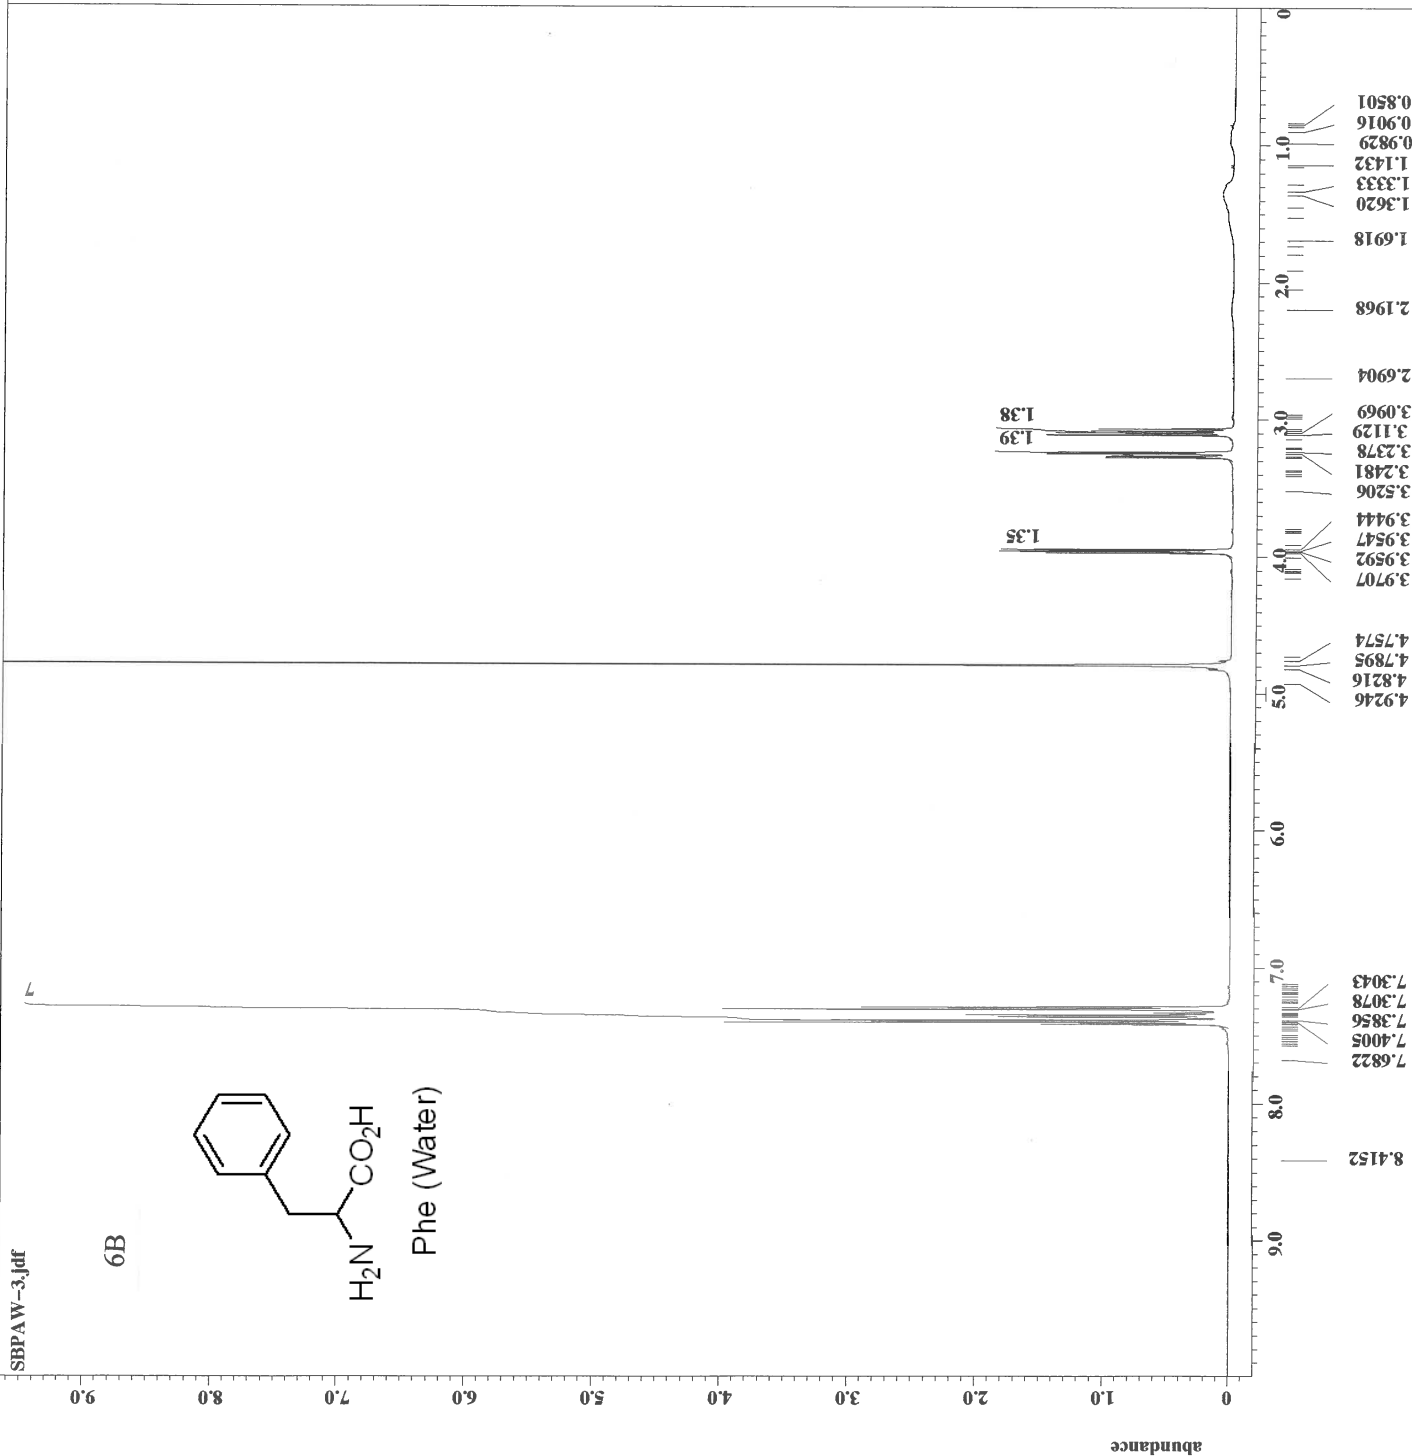

X : parts per Million : 1H

```

Filename      = SBPAW-3.jdf
Author        = delta
Experiment    = single_pulse.ex2
Sample_id     = S#695842
Solvent       = D2O
Creation_time = 9-SEP-2015 08:06:28
Revision_time = 8-SEP-2015 19:25:33
Current_time  = 8-SEP-2015 19:26:16

Comment       = single_pulse
Data_format   = ID COMPLEX
Dim_size      = 13107
Dim_title     = 1H
Dim_units     = [ppm]
Dimensions    = X
Site          = ECA 500
Spectrometer  = JNM-ECA500

Field_strength = 11.7473579[T] (500[MH
X_acq_duration = 1.74587904[s]
X_domain       = 1H
X_freq         = 500.15991521[MHz]
X_offset       = 5.0[ppm]
X_points       = 16384
X_prescans     = 0
X_resolution   = 0.57277737[Hz]
X_sweep        = 9.38438438[kHz]
X_domain       = 1H
Irr_freq       = 500.15991521[MHz]
Irr_offset     = 5.0[ppm]
Tri_domain     = 1H
Tri_freq       = 500.15991521[MHz]
Tri_offset     = 5.0[ppm]
Clipped        = FALSE
Mod_return     = 1
Scans          = 10
Total_scans    = 10

X_90_width     = 12.54[us]
X_acq_time     = 1.74587904[s]
X_angle        = 45[deg]
X_atn          = 4[dB]
X_pulse        = 6.27[us]
Irr_mode       = Off
Tri_mode       = Off
Dante_presat   = FALSE
Initial_wait   = 1[s]
Recvr_gain     = 34
Relaxation_delay = 10[s]
Repetition_time = 11.74587904[s]
Temp_get       = 21.3[degC]

```

6B

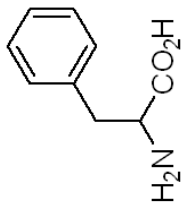

Phe (Water)

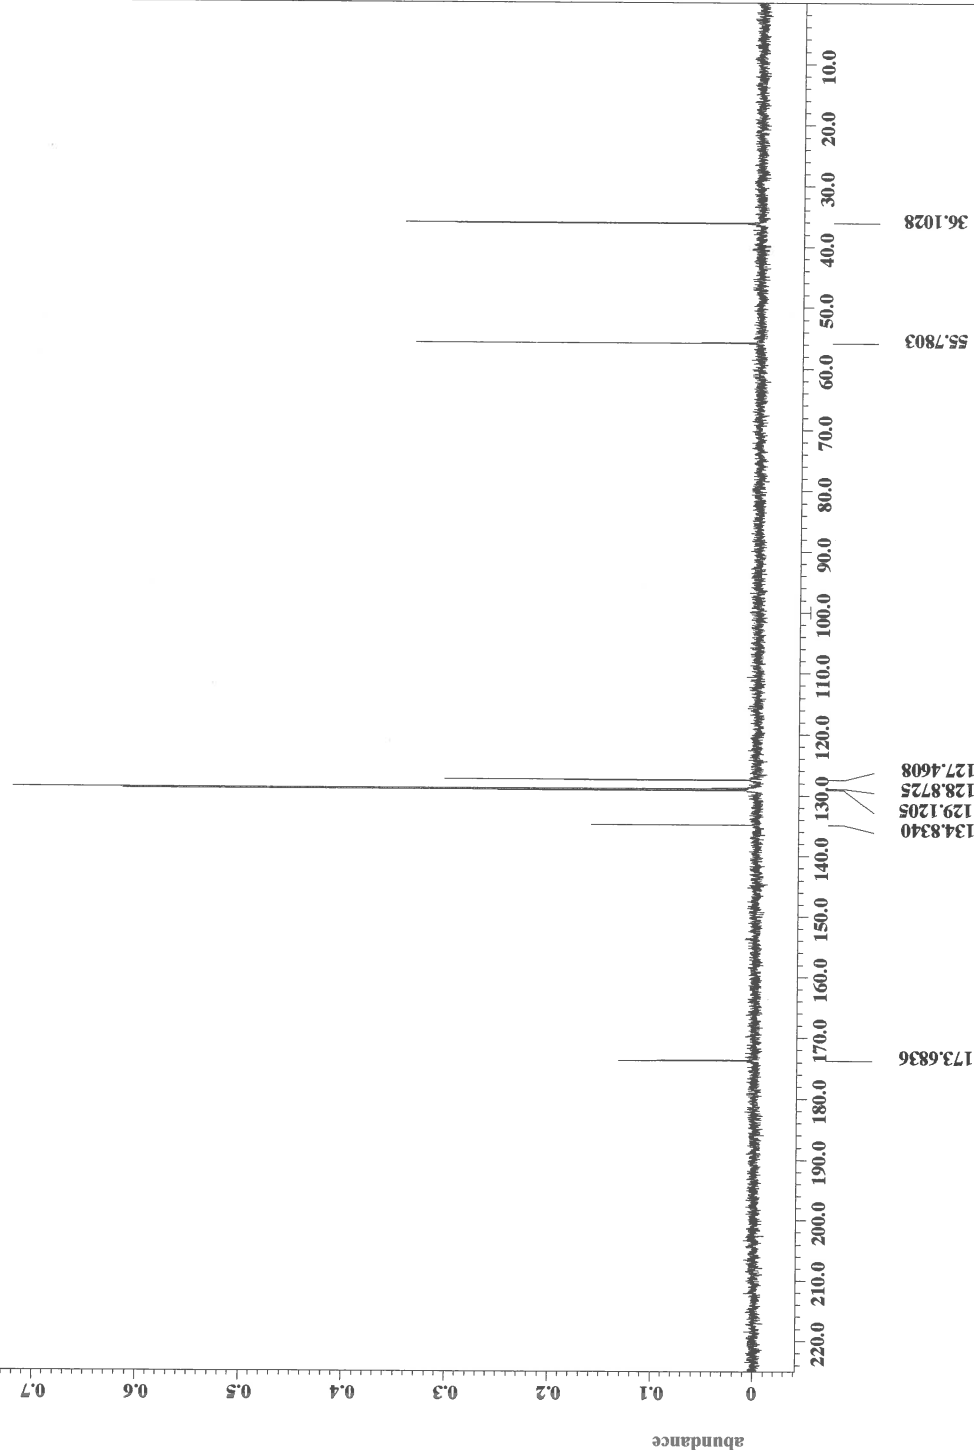

Filename = SBPAWC-2.jdf  
Author = delta  
Experiment = single\_pulse\_dec  
Sample\_id = S#698167  
Solvent = D2O  
Creation\_time = 9-SEP-2015 08:12:34  
Revision\_time = 8-SEP-2015 19:29:24  
Current\_time = 8-SEP-2015 19:29:33  
Comment = single pulse decouple  
Data\_format = 1D COMPLEX  
Dim\_size = 26214  
Dim\_title = 13C  
Dim\_units = [ppm]  
Dimensions = X  
Site = ECA 500  
Spectrometer = JNM-ECA500  
Field\_strength = 11.7473579[T] (500[MH  
X\_acq\_duration = 0.83361792[s]  
X\_domain = 13C  
X\_freq = 125.76529768[MHz]  
X\_offset = 100[ppm]  
X\_points = 32768  
X\_prescans = 4  
X\_resolution = 1.19959034[Hz]  
X\_sweep = 39.3081761[kHz]  
Irr\_domain = 1H  
Irr\_freq = 500.15991521[MHz]  
Irr\_offset = 5.0[ppm]  
Clipped = FALSE  
Mod\_return = 10  
Scans = 230.0  
Total\_scans = 230.0  
X\_90\_width = 10.73[us]  
X\_acq\_time = 0.83361792[s]  
X\_angle = 30[deg]  
X\_atn = 9[db]  
X\_pulse = 3.57666667[us]  
Irr\_atn\_dec = 20[db]  
Irr\_atn\_noe = 20[db]  
Irr\_noise = WALYZ  
Decoupling = TRUE  
Initial\_wait = 1[s]  
Noe = TRUE  
Noe\_time = 0.5[s]  
Recvr\_gain = 50  
Relaxation\_delay = 0.5[s]  
Repetition\_time = 1.3361792[s]  
Temp\_get = 21.7[dc]

7B

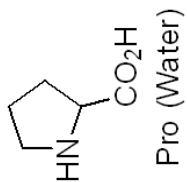

3.05

1.03

1.01

0.99

1.7087  
1.7190  
1.8313  
1.8450  
1.8553  
1.8599  
1.8679  
1.8817  
1.9080  
1.9206  
2.0408  
2.0534  
2.1714  
2.1851  
2.1886  
2.1966  
2.2012  
2.2138

3.0360  
3.1620  
3.1723  
3.1769  
3.1860  
3.1998  
3.2536  
3.2673  
3.2765  
3.3979

3.8044  
3.8182  
3.9556  
3.9682  
3.9728  
3.9854  
3.9991  
4.1010  
4.1148

X : parts per Million : 1H

abundance

7B

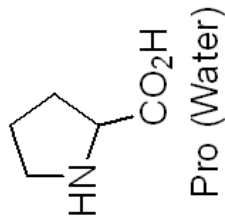

```

Filename      = SBPrWC-2.jdf
Author       = delta
Experiment   = single_pulse_dec
Sample_id    = S#697198
Solvent      = D2O
Creation_time = 5-SEP-2015 08:12:28
Revision_time = 4-SEP-2015 19:29:27
Current_time  = 4-SEP-2015 19:31:06

Comment      = single pulse decouple
Data_format  = 1D COMPLEX
Dim_size     = 26214
Dim_title    = 13C
Dim_units    = [ppm]
Dimensions   = X
Site         = ECA 500
Spectrometer = JNM-ECA500

Field_strength = 11.7473579[T] (500[MH
X_acq_duration = 0.83361792[s]
X_domain       = 13C
X_freq         = 125.76529768[MHz]
X_offset       = 100[ppm]
X_points       = 32768
X_prescans     = 4
X_resolution   = 1.19959034[Hz]
X_sweep        = 39.3081761[kHz]
Irr_domain     = 1H
Irr_freq       = 500.15991521[MHz]
Irr_offset     = 5.0[ppm]
Clipped        = FALSE
Mod_return     = 10
Scans          = 140
Total_scans    = 140

X_90_width     = 10.73[us]
X_acq_time     = 0.83361792[s]
X_angle        = 30[deg]
X_atn          = 9[db]
X_pulse        = 3.57666667[us]
Irr_atn_dec    = 20[db]
Irr_atn_noe    = 20[db]
Irr_noise      = WALTZ
Decoupling     = TRUE
Initial_wait   = 1[s]
Noe            = TRUE
Noe_time       = 2[s]
Recvr_gain     = 50
Relaxation_delay = 2[s]
Repetition_time = 2.83361792[s]
Temp_get       = 21[dc]

```

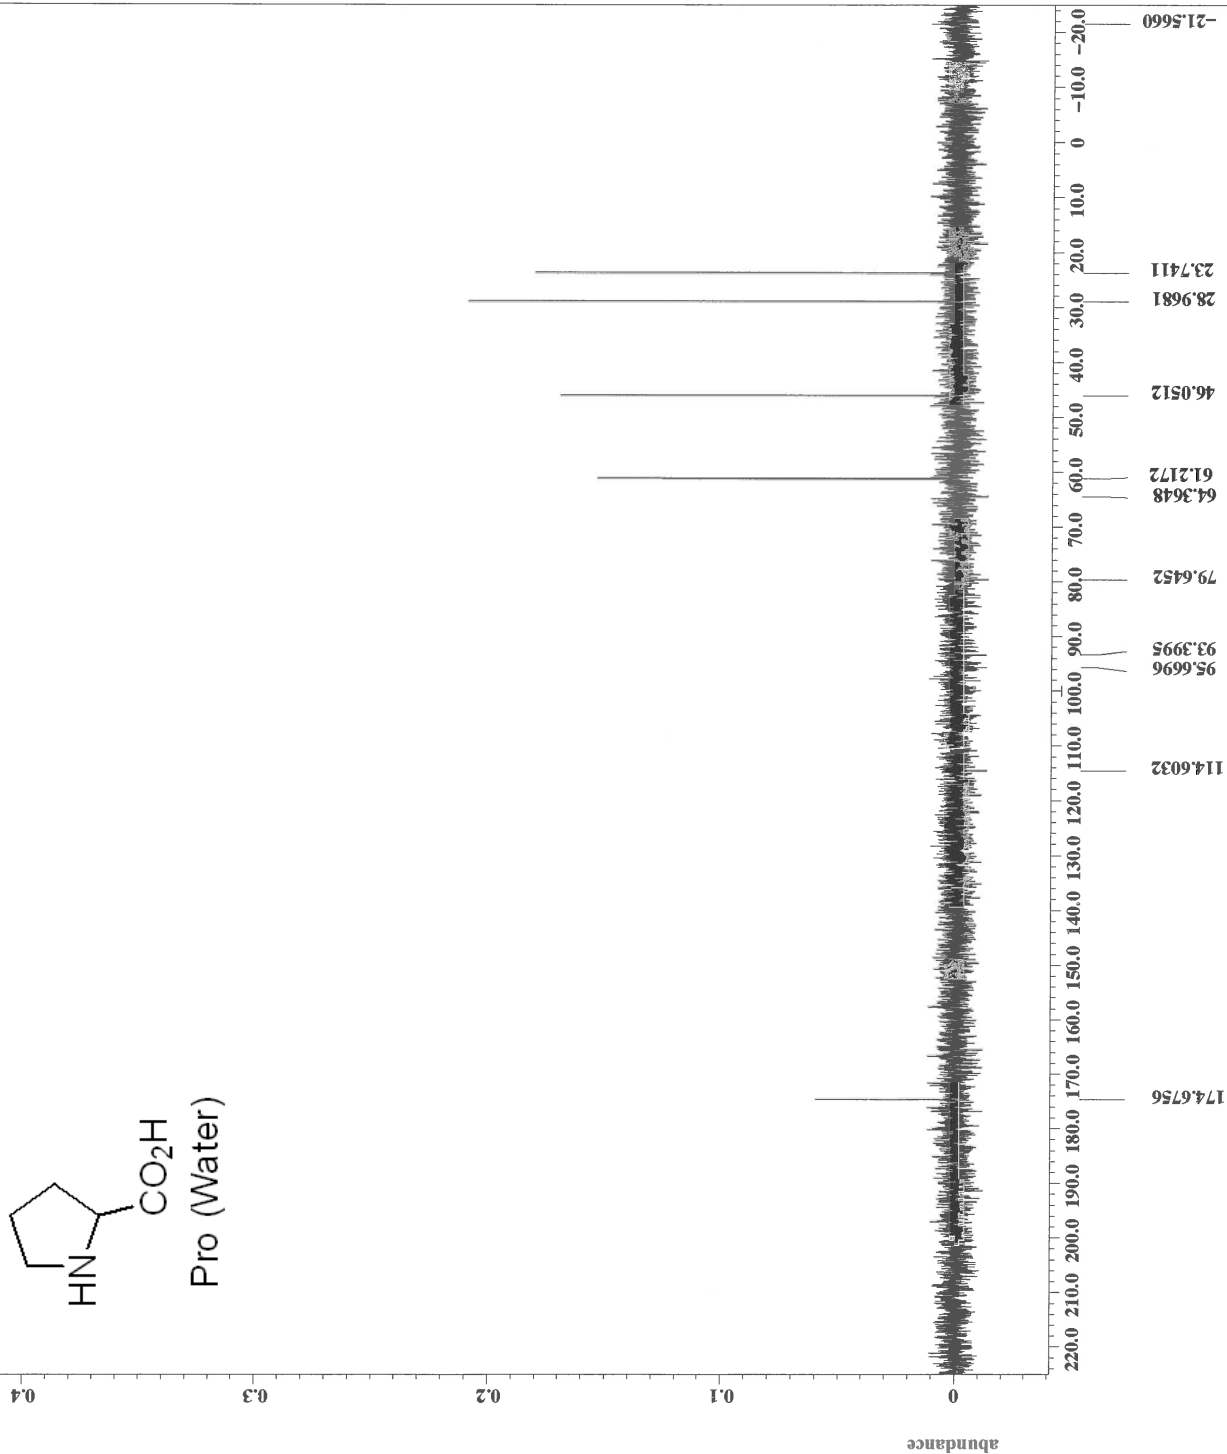



8B

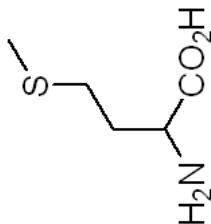

Met (Water)

Filename = SBMetWC-2.jdf  
Author = delta  
Experiment = single\_pulse\_dec  
Sample\_id = S#703584  
Solvent = D2O  
Creation\_time = 5-SEP-2015 08:56:06  
Revision\_time = 4-SEP-2015 20:13:50  
Current\_time = 4-SEP-2015 20:13:59  
Comment = single pulse decouple  
Data\_format = 1D COMPLEX  
Dim\_size = 26214  
Dim\_title = 13C  
Dim\_units = [ppm]  
Dimensions = X  
Site = ECA 500  
Spectrometer = JNM-ECA500  
Field\_strength = 11.7473579[T] (500[MH  
X\_acq\_duration = 0.83361792[s]  
X\_domain = 13C  
X\_freq = 125.76529768[MHz]  
X\_offset = 100[ppm]  
X\_points = 32768  
X\_prescans = 4  
X\_resolution = 1.19959034[Hz]  
X\_sweep = 39.3081761[kHz]  
Irr\_domain = 1H  
Irr\_freq = 500.15991521[MHz]  
Irr\_offset = 5.0[ppm]  
Clipped = FALSE  
Mod\_return = 10  
Scans = 840  
Total\_scans = 840  
X\_90\_width = 10.73[us]  
X\_acq\_time = 0.83361792[s]  
X\_angle = 30[deg]  
X\_atn = 9[db]  
X\_pulse = 3.57666667[us]  
Irr\_atn\_dec = 20[db]  
Irr\_atn\_noe = 20[db]  
Irr\_noise = WALYZ  
Decoupling = TRUE  
Initial\_wait = 1[s]  
Noe = TRUE  
Noe\_time = 2[s]  
Recvr\_gain = 50  
Relaxation\_delay = 2[s]  
Repetition\_time = 2.83361792[s]  
Temp\_get = 21.5[dc]

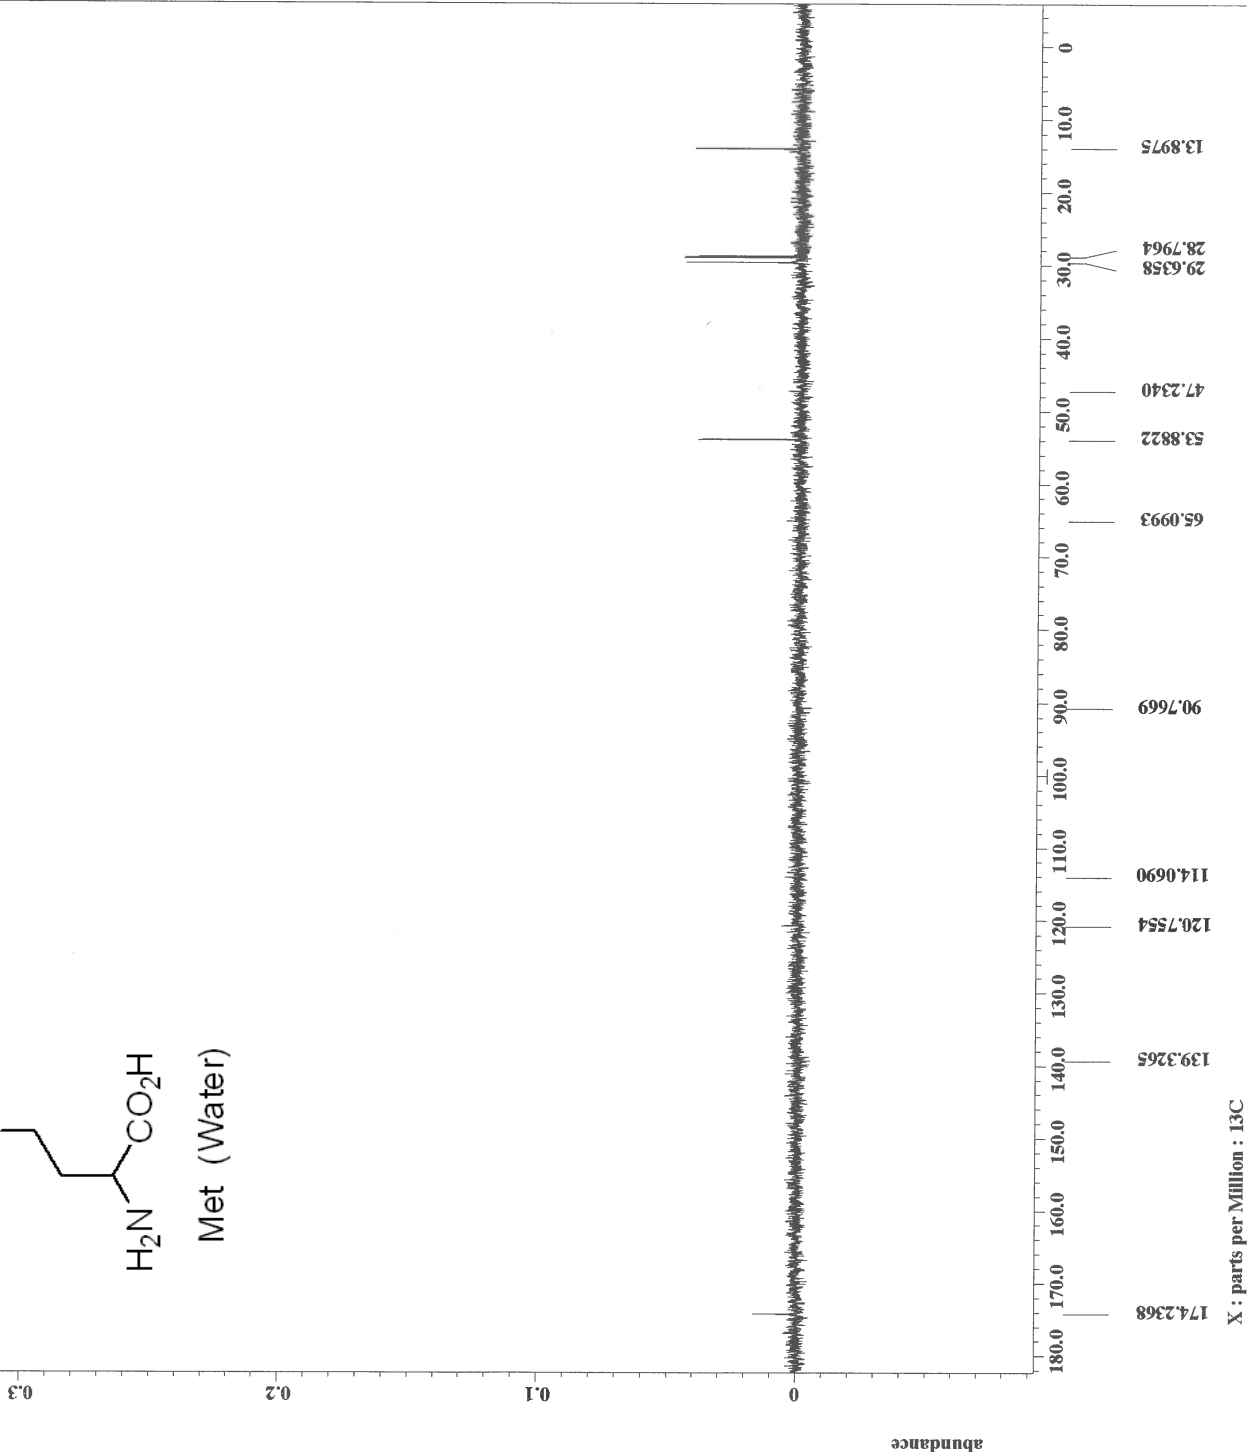

X : parts per Million : 13C



9B

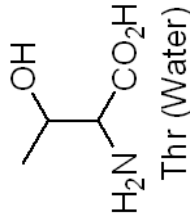

```

Filename      = SBTHW-3.jdf
Author        = delta
Experiment    = single_pulse.ex2
Sample_id     = S#655485
Solvent       = D2O
Creation_time  = 8-SEP-2015 07:00:19
Revision_time  = 7-SEP-2015 18:19:41
Current_time   = 7-SEP-2015 18:20:31

Comment       = single_pulse
Data_format   = ID COMPLEX
Dim_size      = 13107
Dim_title     = 1H
Dim_units     = [ppm]
Dimensions    = X
Site          = ECA 500
Spectrometer  = JNM-ECA500

Field_strength = 11.7473579[T] (500[MH
X_acq_duration = 1.74587904[s]
X_domain       = 1H
X_freq         = 500.15991521[MHz]
X_offset       = 5.0[ppm]
X_points       = 1638#
X_prescans     = 0
X_resolution   = 0.57277737[Hz]
X_sweep        = 9.38438438[kHz]
Irr_domain     = 1H
Irr_freq       = 500.15991521[MHz]
Irr_offset     = 5.0[ppm]
Tri_domain     = 1H
Tri_freq       = 500.15991521[MHz]
Tri_offset     = 5.0[ppm]
Clipped        = FALSE
Mod_return     = 1
Scans          = 16
Total_scans    = 16

X_90_width    = 12.54[us]
X_acq_time     = 1.74587904[s]
X_angle        = 45[deg]
X_atn          = 4[dB]
X_pulse        = 6.27[us]
Irr_mode       = Off
Tri_mode       = Off
Dante_presat   = FALSE
Initial_wait   = 1[s]
Recvr_gain     = 36
Relaxation_delay = 10[s]
Repetition_time = 11.74587904[s]
Temp_get       = 21.2[dc]

```

3

1.03

0.97

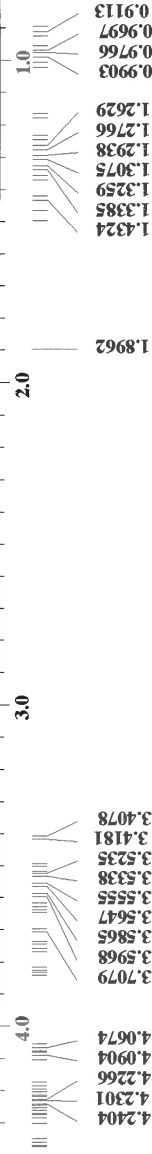

X : parts per Million : 1H

9B

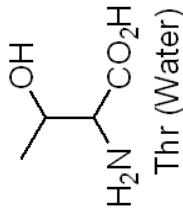

```

Filename      = SBTHWC-2.jdf
Author        = delta
Experiment    = single_pulse_dec
Sample_id     = S#658391
Solvent       = D2O
Creation_time = 8-SEP-2015 07:07:34
Revision_time = 7-SEP-2015 18:23:57
Current_time  = 7-SEP-2015 18:24:24

Comment       = single pulse decouple
Data_format   = 1D COMPLEX
Dim_size      = 26214
Dim_title     = 13C
Dim_units     = [ppm]
Dimensions    = X
Site          = ECA 500
Spectrometer  = JNM-ECA500

Field_strength = 11.7473579[T] (500[MH
X_acq_duration = 0.83361792[s]
X_domain       = 13C
X_freq         = 125.76529768[MHz]
X_offset       = 100[ppm]
X_points       = 32768
X_prescans     = 4
X_resolution   = 1.19959034[Hz]
X_sweep        = 39.3081761[kHz]
X_atn          = 1H
Irr_domain     = 500.15991521[MHz]
Irr_freq       = 500.15991521[MHz]
Irr_offset     = 5.0[ppm]
Clipped        = FALSE
Mod_return     = 10
Scans          = 210
Total_scans    = 210

X_90_width     = 10.73[us]
X_acq_time     = 0.83361792[s]
X_angle        = 30[deg]
X_atn          = 9[db]
X_pulse        = 3.57666667[us]
Irr_atn_dec    = 20[db]
Irr_atn_noe    = 20[db]
Irr_noise      = WALTZ
Decoupling     = TRUE
Initial_wait   = 1[s]
Noe            = TRUE
Noe_time       = 1[s]
Recvr_gain     = 50
Relaxation_delay = 1[s]
Repetition_time = 1.83361792[s]
Temp_get       = 21.7[dc]

```

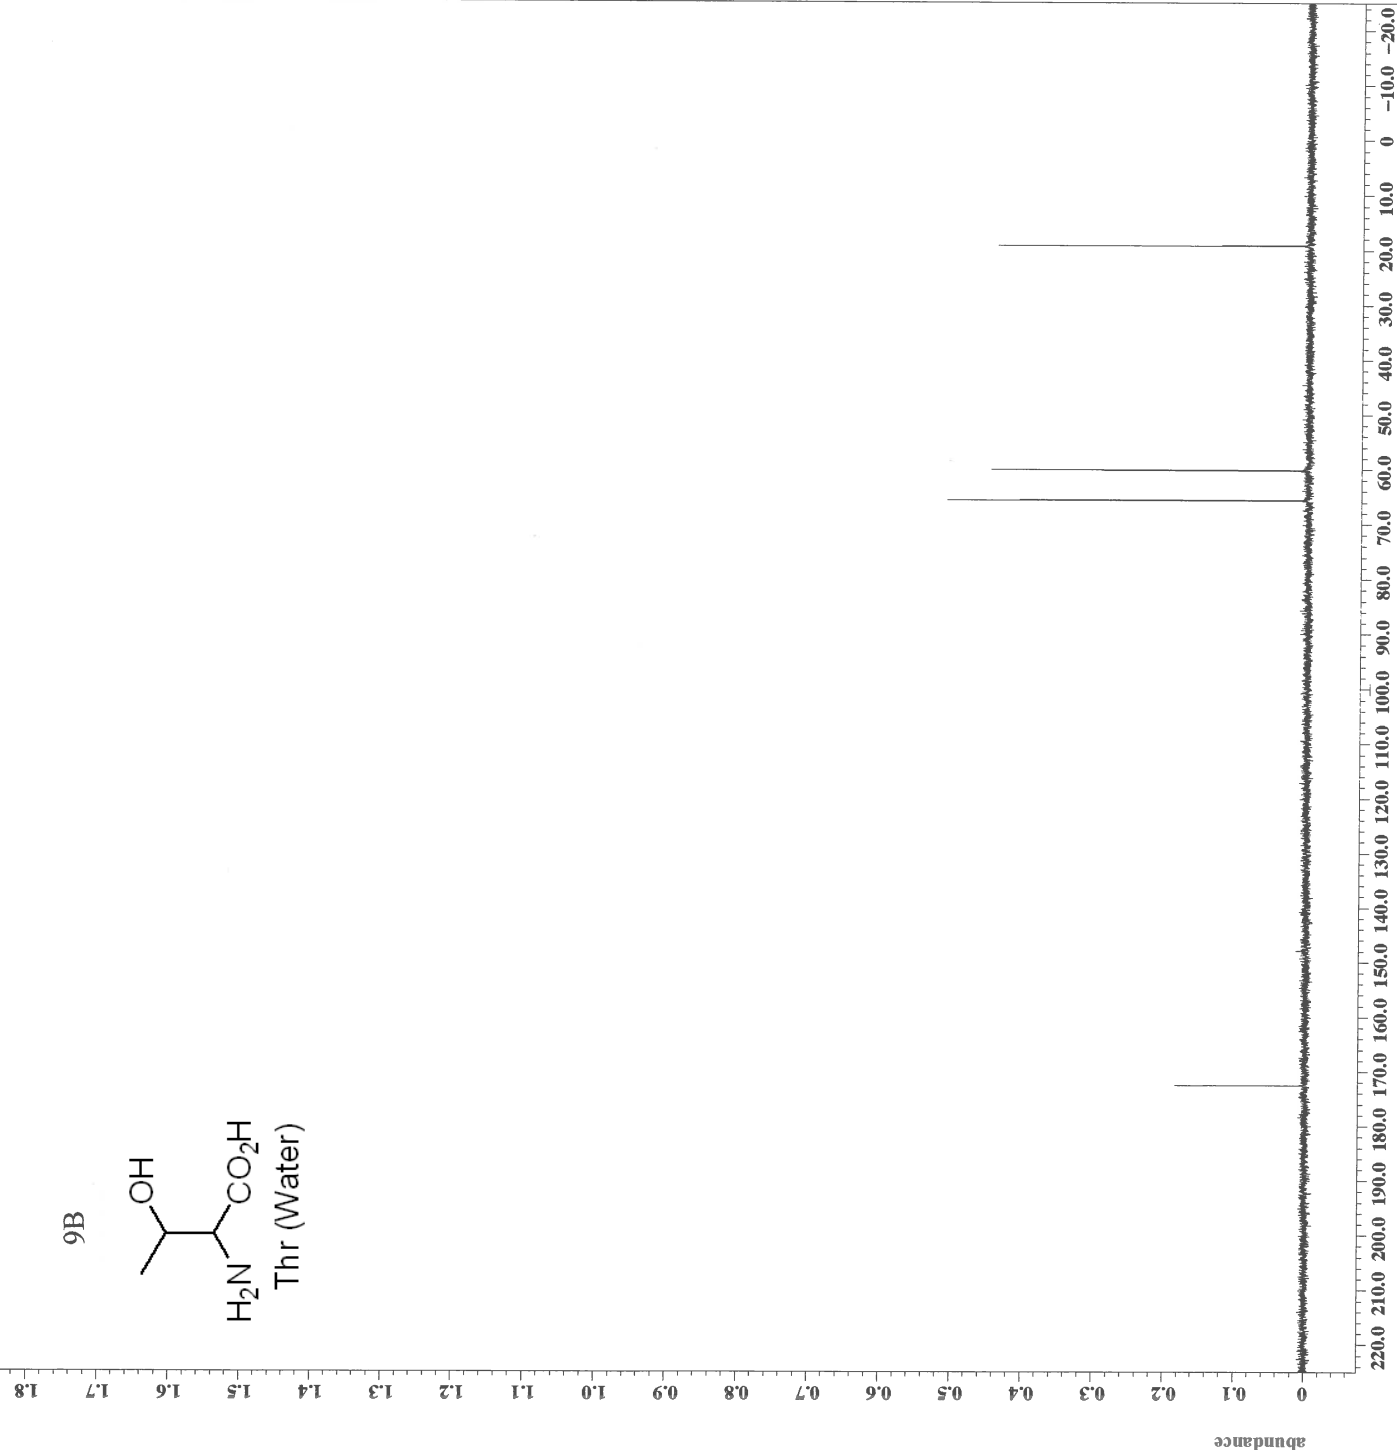

10B

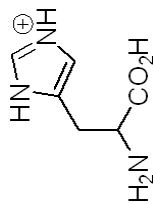

His (Water)

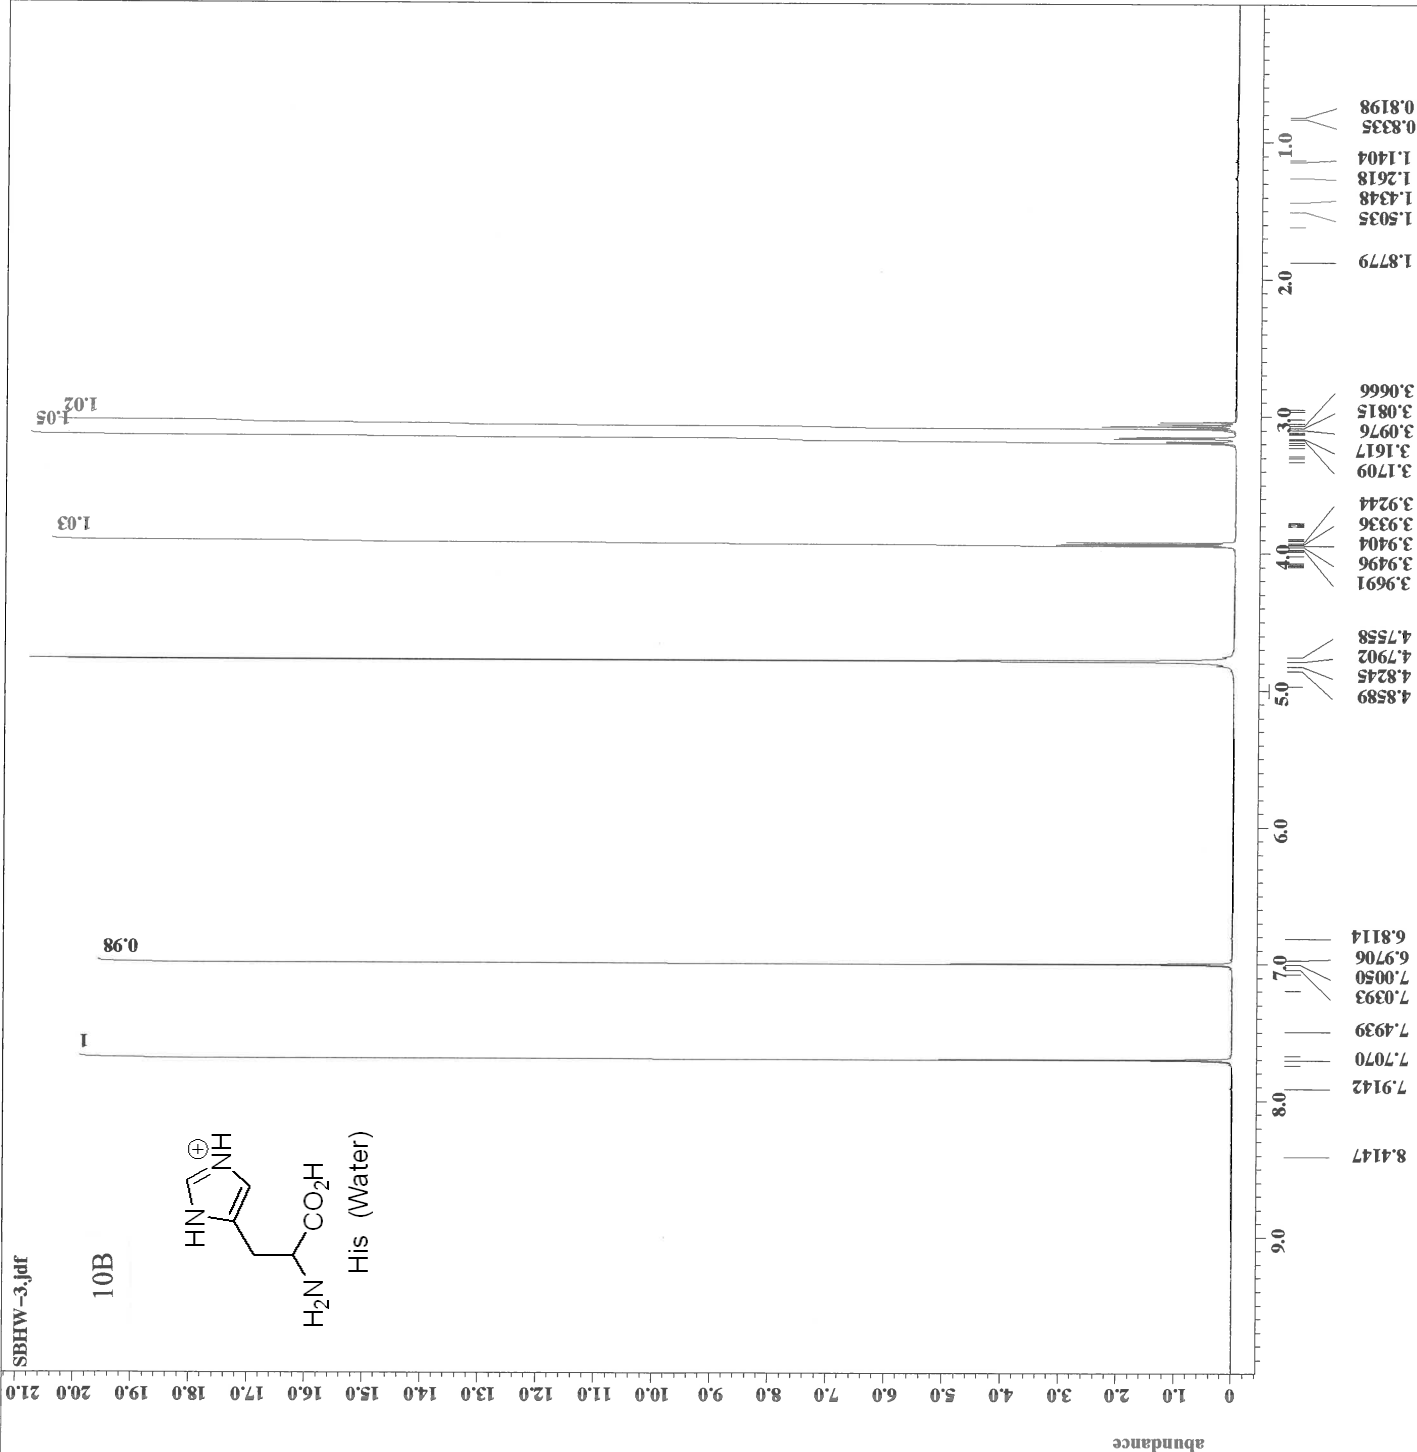

X : parts per Million : 1H

```

Filename      = SBHW-3.jdf
Author        = delta
Experiment    = single_pulse.ex2
Sample_id     = S#327296
Solvent       = D2O
Creation_time  = 7-SEP-2015 21:52:53
Revision_time  = 7-SEP-2015 09:11:18
Current_time   = 7-SEP-2015 09:11:59

Comment       = single_pulse
Data_format   = 1D COMPLEX
Dim_size      = 13107
Dim_title     = 1H
Dim_units     = [ppm]
Dimensions    = X
Site          = ECA 500
Spectrometer  = JNM-ECA500

Field_strength = 11.7473579[T] (500[MH
X_acq_duration = 1.74587904[s]
X_domain       = 1H
X_freq         = 500.15991521[MHz]
X_offset       = 5.0[ppm]
X_points       = 16384
X_prescans     = 0
X_resolution   = 0.57277737[Hz]
X_sweep        = 9.38438438[kHz]
Irr_domain     = 1H
Irr_freq       = 500.15991521[MHz]
Irr_offset     = 5.0[ppm]
Tri_domain     = 1H
Tri_freq       = 500.15991521[MHz]
Tri_offset     = 5.0[ppm]
Clipped        = FALSE
Mod_return     = 1
Scans          = 11
Total_scans    = 11

X_90_width     = 12.54[us]
X_acq_time     = 1.74587904[s]
X_angle        = 45[deg]
X_atn          = 4[dB]
X_pulse        = 6.27[us]
Irr_mode       = Off
Tri_mode       = Off
Dante_presat   = FALSE
Initial_wait   = 1[s]
Recvr_gain     = 44
Relaxation_delay = 10[s]
Repetition_time = 11.74587904[s]
Temp_get       = 21[dc]

```

10B

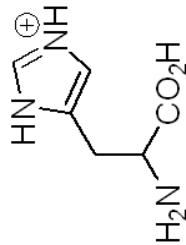

His (Water)

Filename = samplename-2.jdf  
 Author = delta  
 Experiment = single\_pulse\_dec  
 Sample\_id = S#329812  
 Solvent = D2O  
 Creation\_time = 7-SEP-2015 22:11:03  
 Revision\_time = 7-SEP-2015 09:28:13  
 Current\_time = 7-SEP-2015 09:29:02  
 Comment = single pulse decouple  
 Data\_format = 1D COMPLEX  
 Dim\_size = 26214  
 Dim\_title = 13C  
 Dim\_units = [ppm]  
 Dimensions = X  
 Site = ECA 500  
 Spectrometer = JNM-ECA500  
 Field\_strength = 11.7473579[T] (500[MH  
 X\_acq\_duration = 0.83361792[s]  
 X\_domain = 13C  
 X\_freq = 125.76529768[MHz]  
 X\_offset = 100[ppm]  
 X\_points = 32768  
 X\_prescans = 4  
 X\_resolution = 1.19959034[Hz]  
 X\_sweep = 39.3081761[kHz]  
 Irr\_domain = 1H  
 Irr\_freq = 500.15991521[MHz]  
 Irr\_offset = 5.0[ppm]  
 Clipped = FALSE  
 Mod\_return = 10  
 Scans = 370  
 Total\_scans = 370  
 X\_90\_width = 10.73[us]  
 X\_acq\_time = 0.83361792[s]  
 X\_angle = 30[deg]  
 X\_atn = 9[db]  
 X\_pulse = 3.57666667[us]  
 Irr\_atn\_dec = 20[db]  
 Irr\_atn\_noe = 20[db]  
 Irr\_noise = WALTZ  
 Decoupling = TRUE  
 Initial\_wait = 1[s]  
 Noe = TRUE  
 Noe\_time = 2[s]  
 Recvr\_gain = 50  
 Relaxation\_delay = 2[s]  
 Repetition\_time = 2.83361792[s]  
 Temp\_get = 21.8[dC]

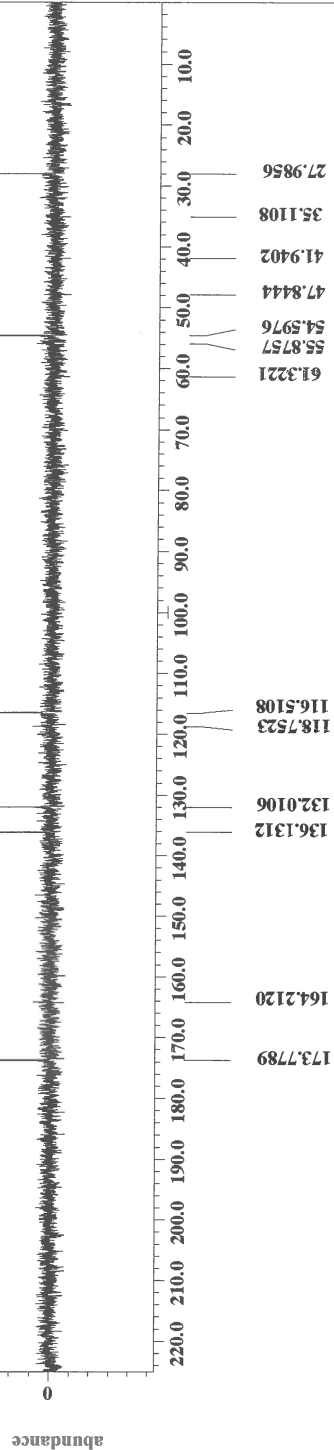

X : parts per Million : 13C

SBLYW-3.jdf

11B

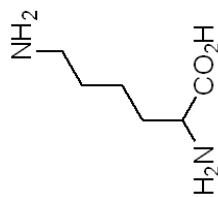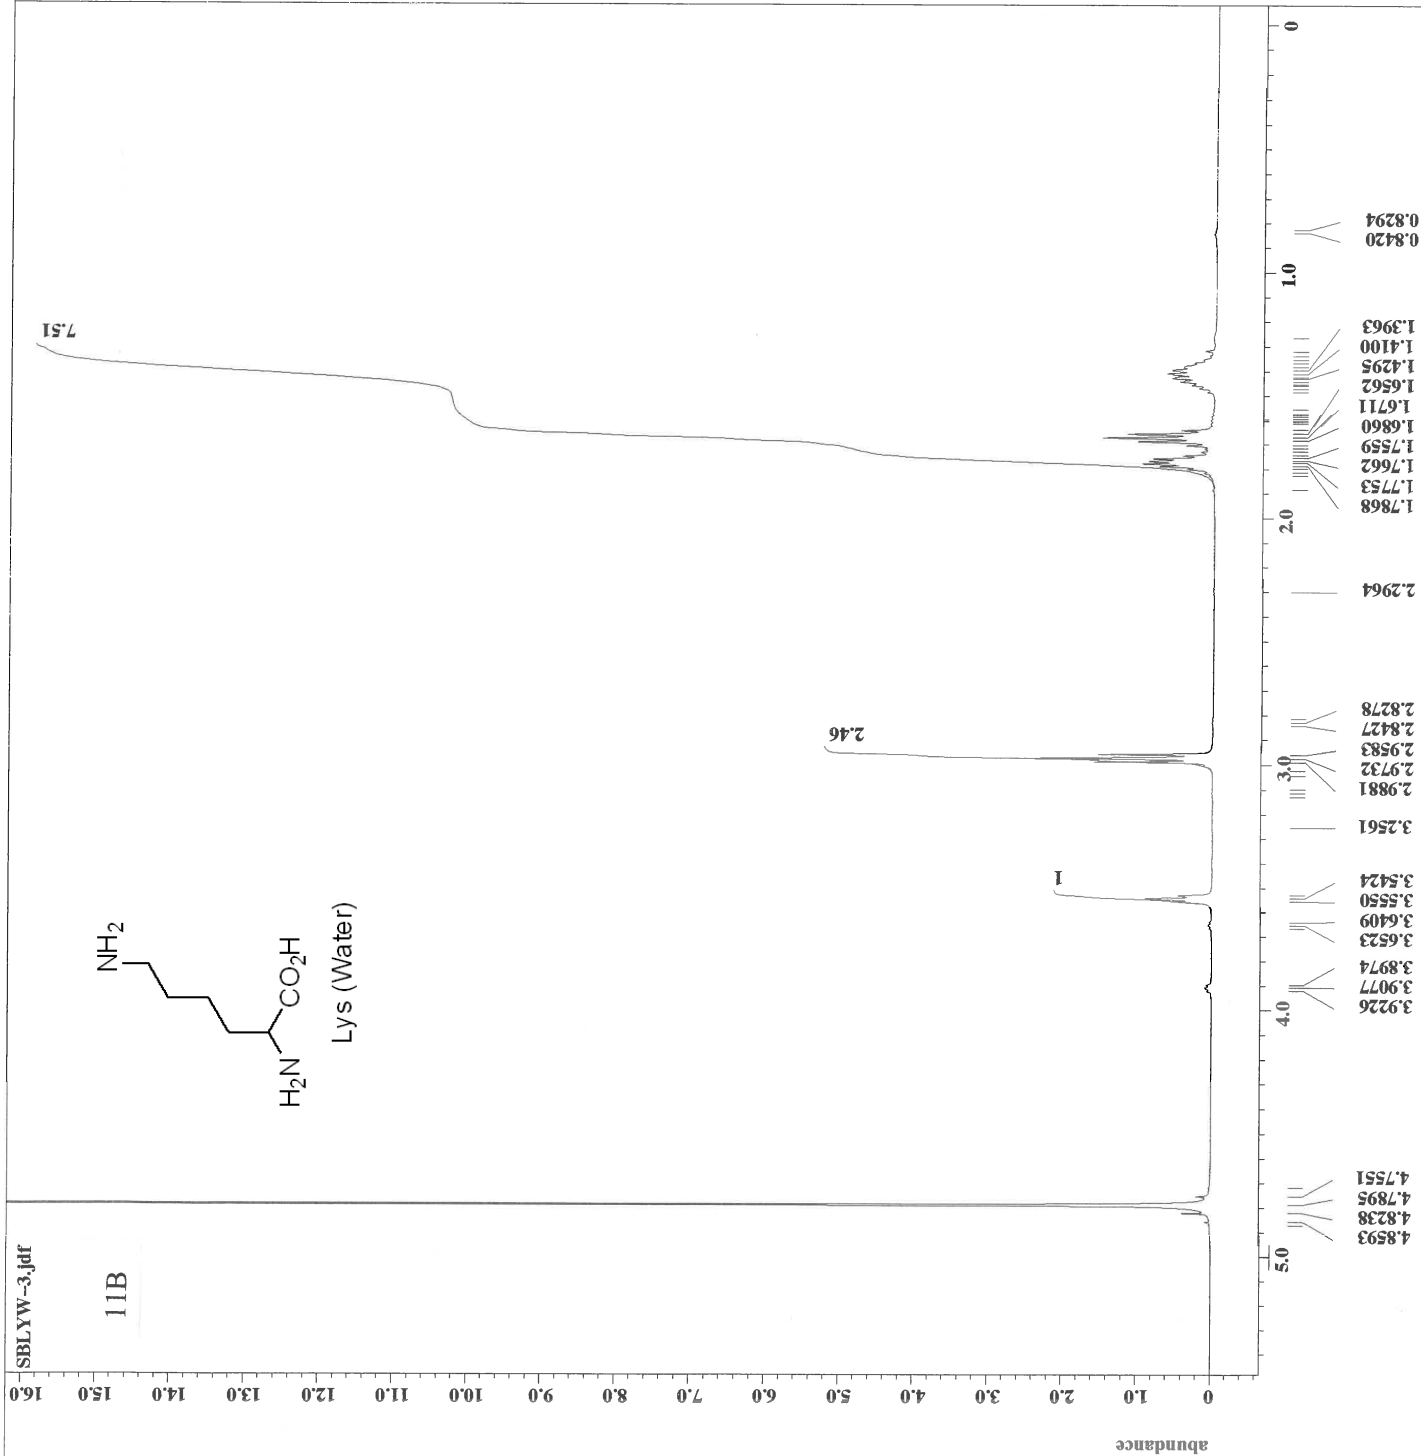

X : parts per Million : 1H

Filename = SBLYW-3.jdf  
 Author = Delta  
 Experiment = single\_pulse.ex2  
 Sample\_id = S#329649  
 Solvent = D2O  
 Creation\_time = 9-SEP-2015 21:56:20  
 Revision\_time = 9-SEP-2015 09:17:02  
 Current\_time = 9-SEP-2015 09:18:13  
 Comment = single\_pulse  
 Data\_format = 1D COMPLEX  
 Dim\_size = 13107  
 Dim\_title = 1H  
 Dim\_units = [ppm]  
 Dimensions = X  
 Site = ECA 500  
 Spectrometer = JNM-ECA500  
 Field\_strength = 11.7473579[T] (500[MH  
 X\_acq\_duration = 1.74587904[s]  
 X\_domain = 1H  
 X\_freq = 500.15991521[MHz]  
 X\_offset = 5.0[ppm]  
 X\_points = 16384  
 X\_prescans = 0  
 X\_resolution = 0.57277737[Hz]  
 X\_sweep = 9.38438438[kHz]  
 Irr\_domain = 1H  
 Irr\_freq = 500.15991521[MHz]  
 Irr\_offset = 5.0[ppm]  
 Tri\_domain = 1H  
 Tri\_freq = 500.15991521[MHz]  
 Tri\_offset = 5.0[ppm]  
 Clipped = FALSE  
 Mod\_return = 1  
 Scans = 11  
 Total\_scans = 11  
 X\_90\_width = 12.54[us]  
 X\_acq\_time = 1.74587904[s]  
 X\_angle = 45[deg]  
 X\_atn = 4[dB]  
 X\_pulse = 6.27[us]  
 Irr\_mode = Off  
 Tri\_mode = Off  
 Dante\_presat = FALSE  
 Initial\_wait = 1[s]  
 Recvr\_gain = 42  
 Relaxation\_delay = 10[s]  
 Repetition\_time = 11.74587904[s]  
 Temp\_get = 21.3[dC]

11B

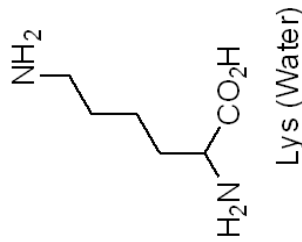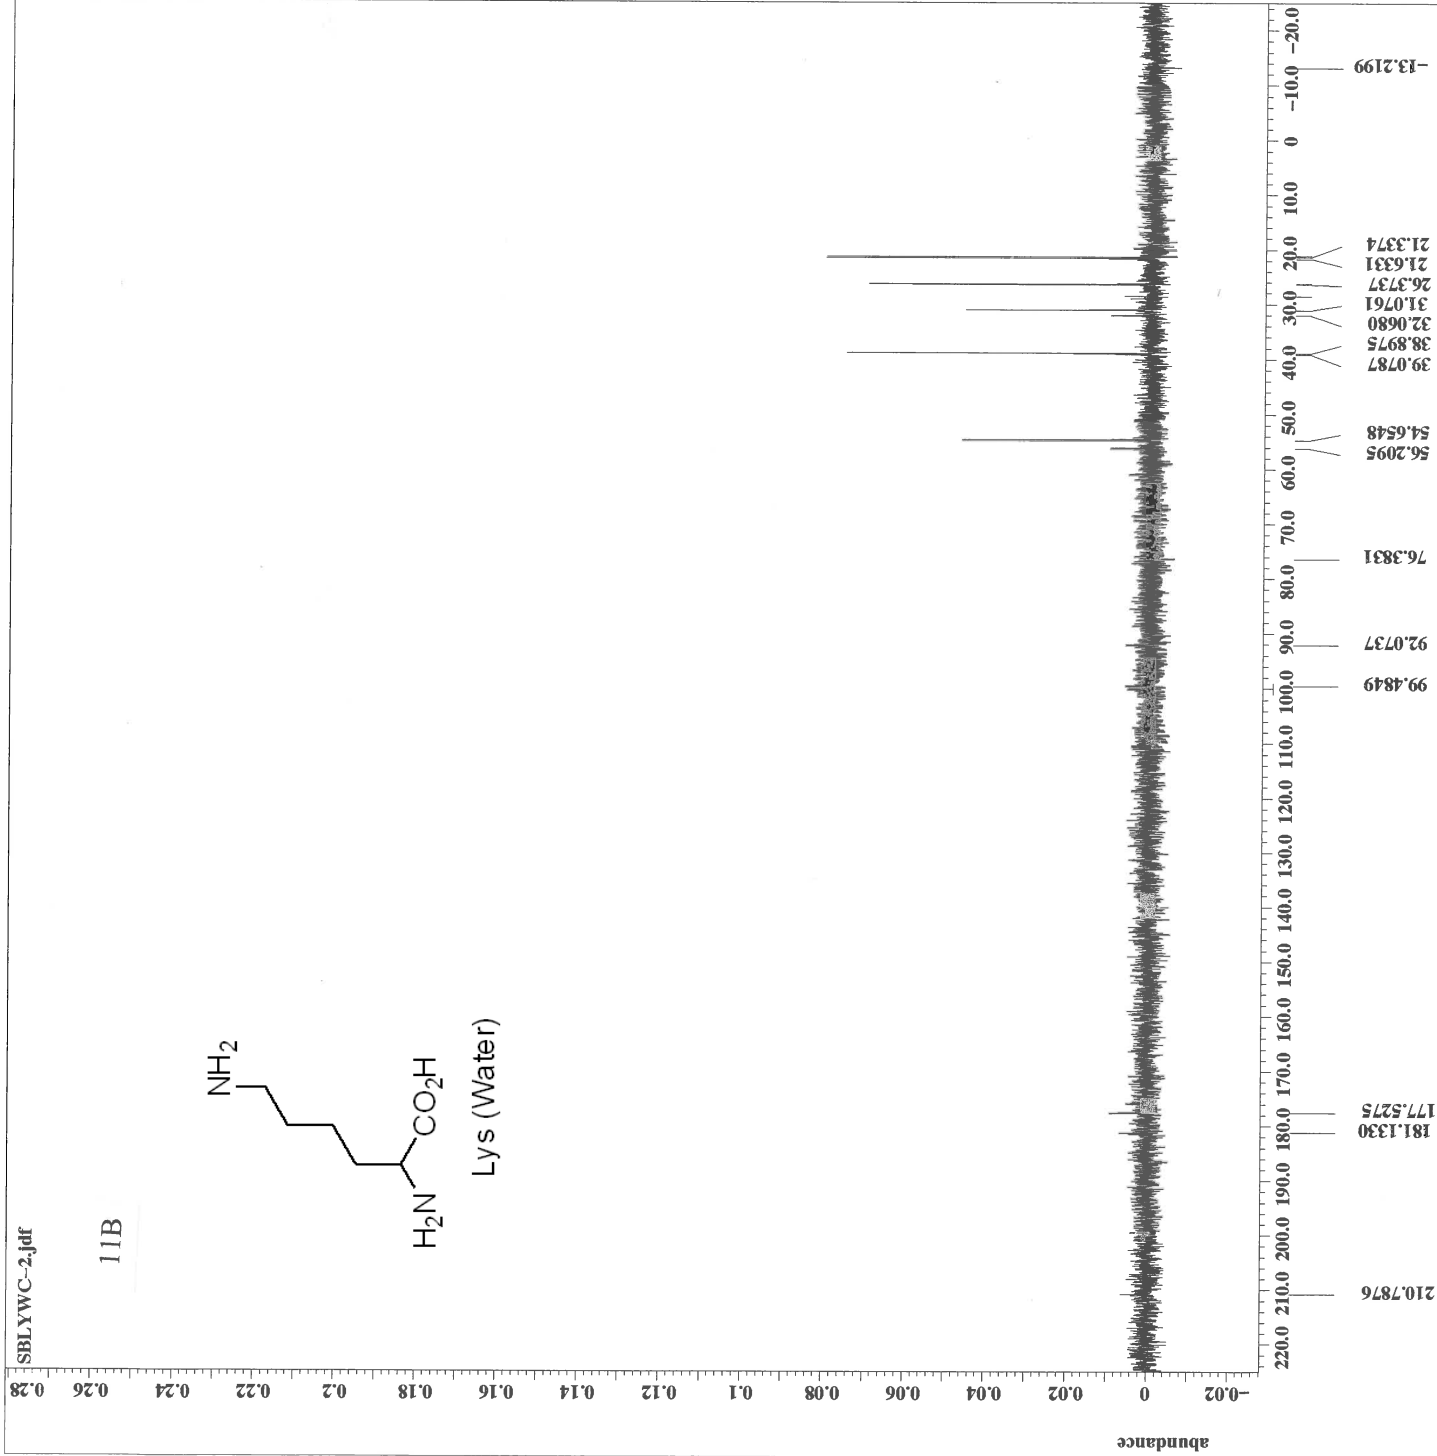

Filename = SBLYWC-2.jdf  
 Author = Delta  
 Experiment = single\_pulse\_dec  
 Sample\_id = S#31949  
 Solvent = D2O  
 Creation\_time = 9-SEP-2015 22:12:00  
 Revision\_time = 9-SEP-2015 09:28:36  
 Current\_time = 9-SEP-2015 09:29:30  
 Comment = single pulse decouple  
 Data\_format = 1D COMPLEX  
 Dim\_size = 26214  
 Dim\_title = 13C  
 Dim\_units = [ppm]  
 Dimensions = X  
 Site = ECA 500  
 Spectrometer = JNM-ECA500  
 Field\_strength = 11.7473579[T] (500[MH  
 X\_acq\_duration = 0.83361792[s]  
 X\_domain = 13C  
 X\_freq = 125.76529768[MHz]  
 X\_offset = 100[ppm]  
 X\_points = 32768  
 X\_prescans = 4  
 X\_resolution = 1.19959034[Hz]  
 X\_sweep = 39.3081761[kHz]  
 Irr\_domain = 1H  
 Irr\_freq = 500.15991521[MHz]  
 Irr\_offset = 5.0[ppm]  
 Clipped = FALSE  
 Mod\_return = 10  
 Scans = 670  
 Total\_scans = 670  
 X\_90\_width = 10.73[us]  
 X\_acq\_time = 0.83361792[s]  
 X\_angle = 30[deg]  
 X\_atn = 9[db]  
 X\_pulse = 3.57666667[us]  
 Irr\_atn\_dec = 20[db]  
 Irr\_atn\_noe = 20[db]  
 Irr\_noise = WALTZ  
 Decoupling = TRUE  
 Initial\_wait = 1[s]  
 Noe = TRUE  
 Noe\_time = 0.5[s]  
 Recvr\_gain = 50  
 Relaxation\_delay = 0.5[s]  
 Repetition\_time = 1.33361792[s]  
 Temp\_get = 21.7[dc]

X : parts per Million : 13C

12B

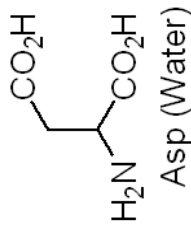

1.99

1

abundance

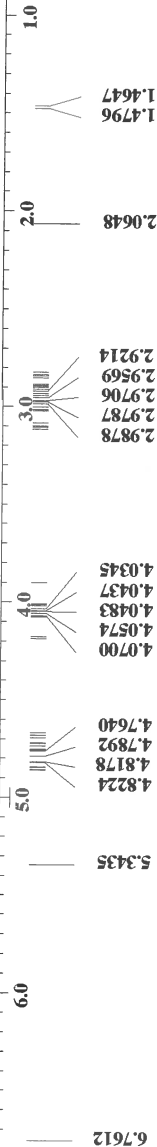

X : parts per Million : 1H

Filename = SBASW-3.fdf  
 Author = delta  
 Experiment = single pulse.ex2  
 Sample id = S#340075  
 Solvent = D2O  
 Creation\_time = 8-SEP-2015 22:12:54  
 Revision\_time = 8-SEP-2015 09:31:32  
 Current\_time = 8-SEP-2015 09:32:03  
 Comment = single\_pulse  
 Data\_format = 1D COMPLEX  
 Dim\_size = 13107  
 Dim\_title = 1H  
 Dim\_units = [ppm]  
 Dimensions = X  
 Site = ECA 500  
 Spectrometer = JNM-ECA500  
 Field\_strength = 11.7473579[T] (500[MH  
 X\_acq\_duration = 1.74587904[s]  
 X\_domain = 1H  
 X\_freq = 500.15991521[MHz]  
 X\_offset = 5.0[ppm]  
 X\_points = 16384  
 X\_prescans = 0  
 X\_resolution = 0.57277737[Hz]  
 X\_sweep = 9.38438438[kHz]  
 Irr\_domain = 1H  
 Irr\_freq = 500.15991521[MHz]  
 Irr\_offset = 5.0[ppm]  
 Tri\_domain = 1H  
 Tri\_freq = 500.15991521[MHz]  
 Tri\_offset = 5.0[ppm]  
 Clipped = FALSE  
 Mod\_return = 1  
 Scans = 9  
 Total\_scans = 9  
 X\_90\_width = 12.54[us]  
 X\_acq\_time = 1.74587904[s]  
 X\_angle = 45[deg]  
 X\_atn = 4[dB]  
 X\_pulse = 6.27[us]  
 Irr\_mode = Off  
 Tri\_mode = Off  
 Dante\_presat = FALSE  
 Initial\_wait = 1[s]  
 Recvr\_gain = 46  
 Relaxation\_delay = 10[s]  
 Repetition\_time = 11.74587904[s]  
 Temp\_get = 21.4[dc]

12B

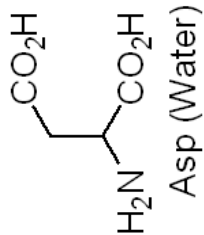

Filename = SBASWC-3.jdf  
 Author = delta  
 Experiment = single\_pulse\_dec  
 Sample\_id = S#341913  
 Solvent = D2O  
 Creation\_time = 8-SEP-2015 22:20:09  
 Revision\_time = 8-SEP-2015 09:37:27  
 Current\_time = 8-SEP-2015 09:37:49  
 Comment = single pulse decouple  
 Data\_format = 1D COMPLEX  
 Dim\_size = 26214  
 Dim\_title = 13C  
 Dim\_units = [ppm]  
 Dimensions = X  
 Site = ECA 500  
 Spectrometer = JNM-ECA500  
 Field\_strength = 11.7473579[T] (500[MH  
 X\_acq\_duration = 0.83361792[s]  
 X\_domain = 13C  
 X\_freq = 125.76529768[MHz]  
 X\_offset = 100[ppm]  
 X\_points = 32768  
 X\_prescans = 4  
 X\_resolution = 1.19959034[Hz]  
 X\_sweep = 39.3081761[kHz]  
 Irr\_domain = 1H  
 Irr\_freq = 500.15991521[MHz]  
 Irr\_offset = 5.0[ppm]  
 Clipped = FALSE  
 Mod\_return = 10  
 Scans = 210  
 Total\_scans = 210  
 X\_90\_width = 10.73[us]  
 X\_acq\_time = 0.83361792[s]  
 X\_angle = 30[deg]  
 X\_atn = 9[dB]  
 X\_pulse = 3.57666667[us]  
 Irr\_atn\_dec = 20[dB]  
 Irr\_atn\_noe = 20[dB]  
 Irr\_noise = WALYZ  
 Decoupling = TRUE  
 Initial\_wait = 1[s]  
 Noe = TRUE  
 Noe\_time = 1[s]  
 Recvr\_gain = 50  
 Relaxation\_delay = 1[s]  
 Repetition\_time = 1.83361792[s]  
 Temp\_get = 21.8[DC]

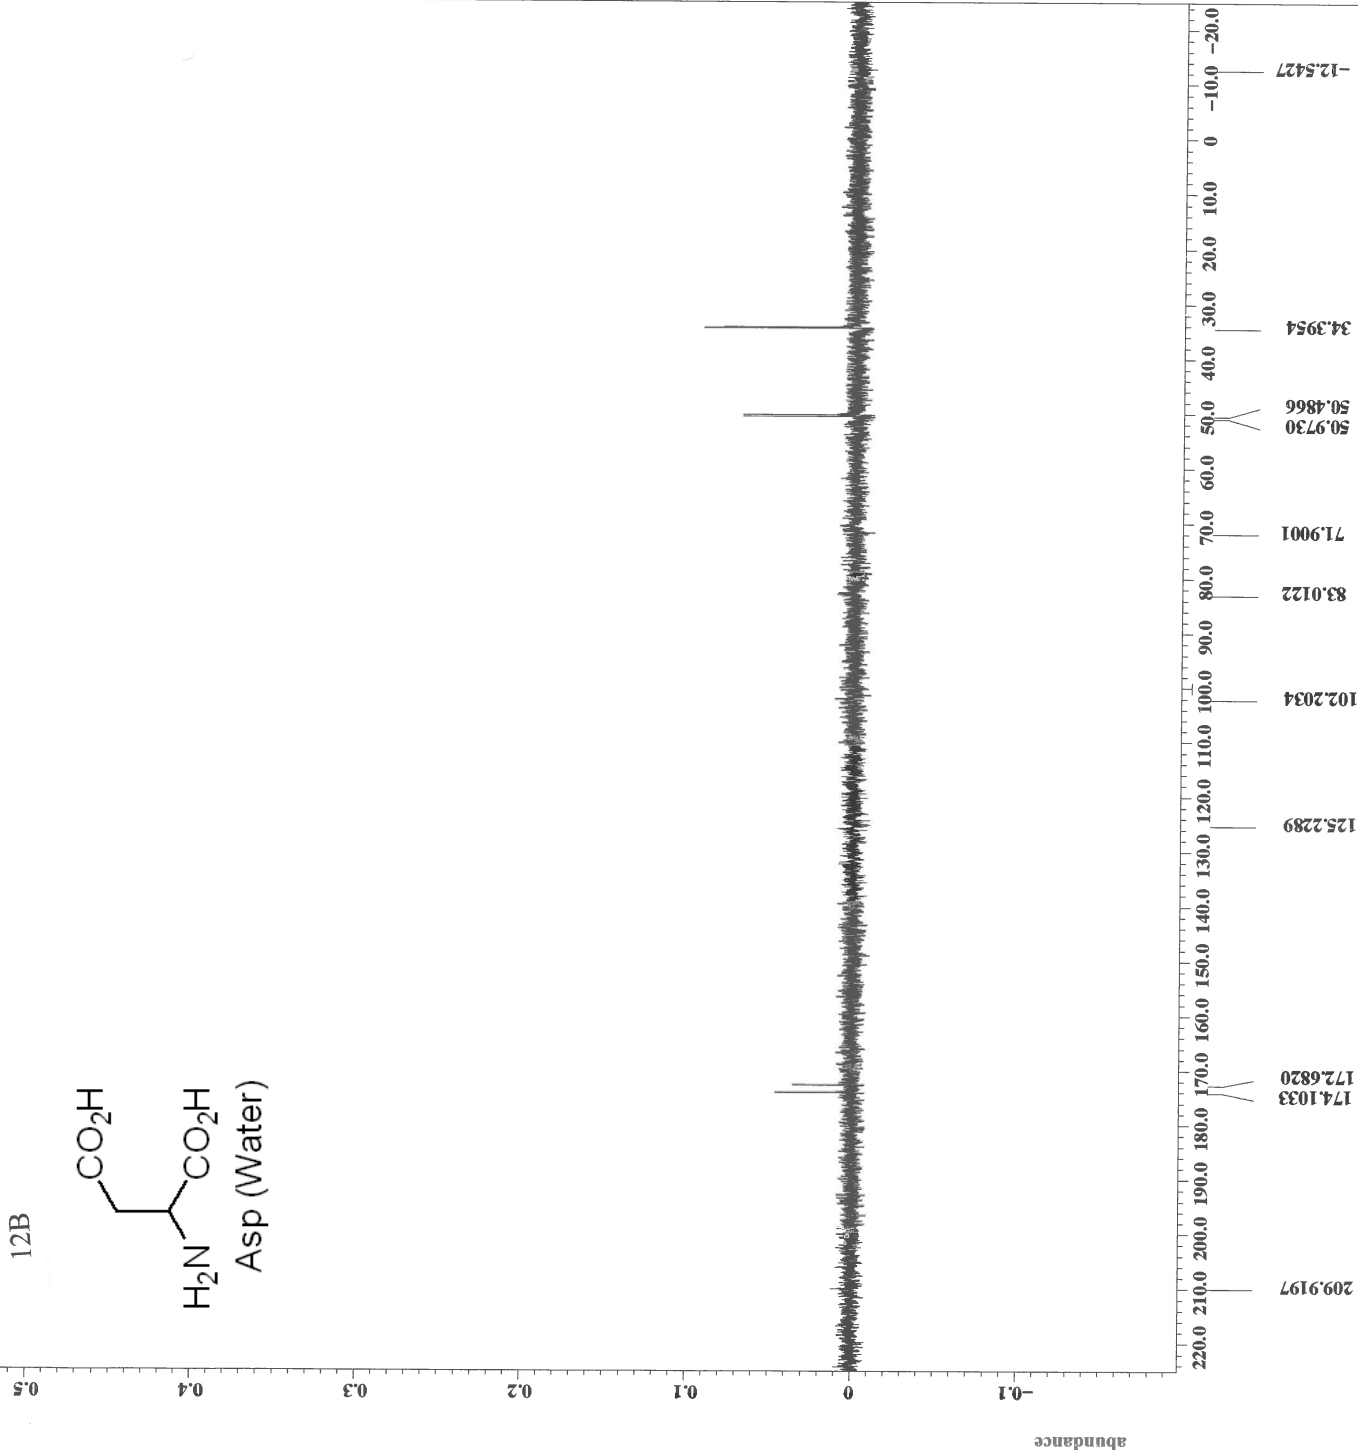



SBGLUW-3.jdf

13B

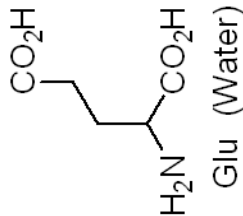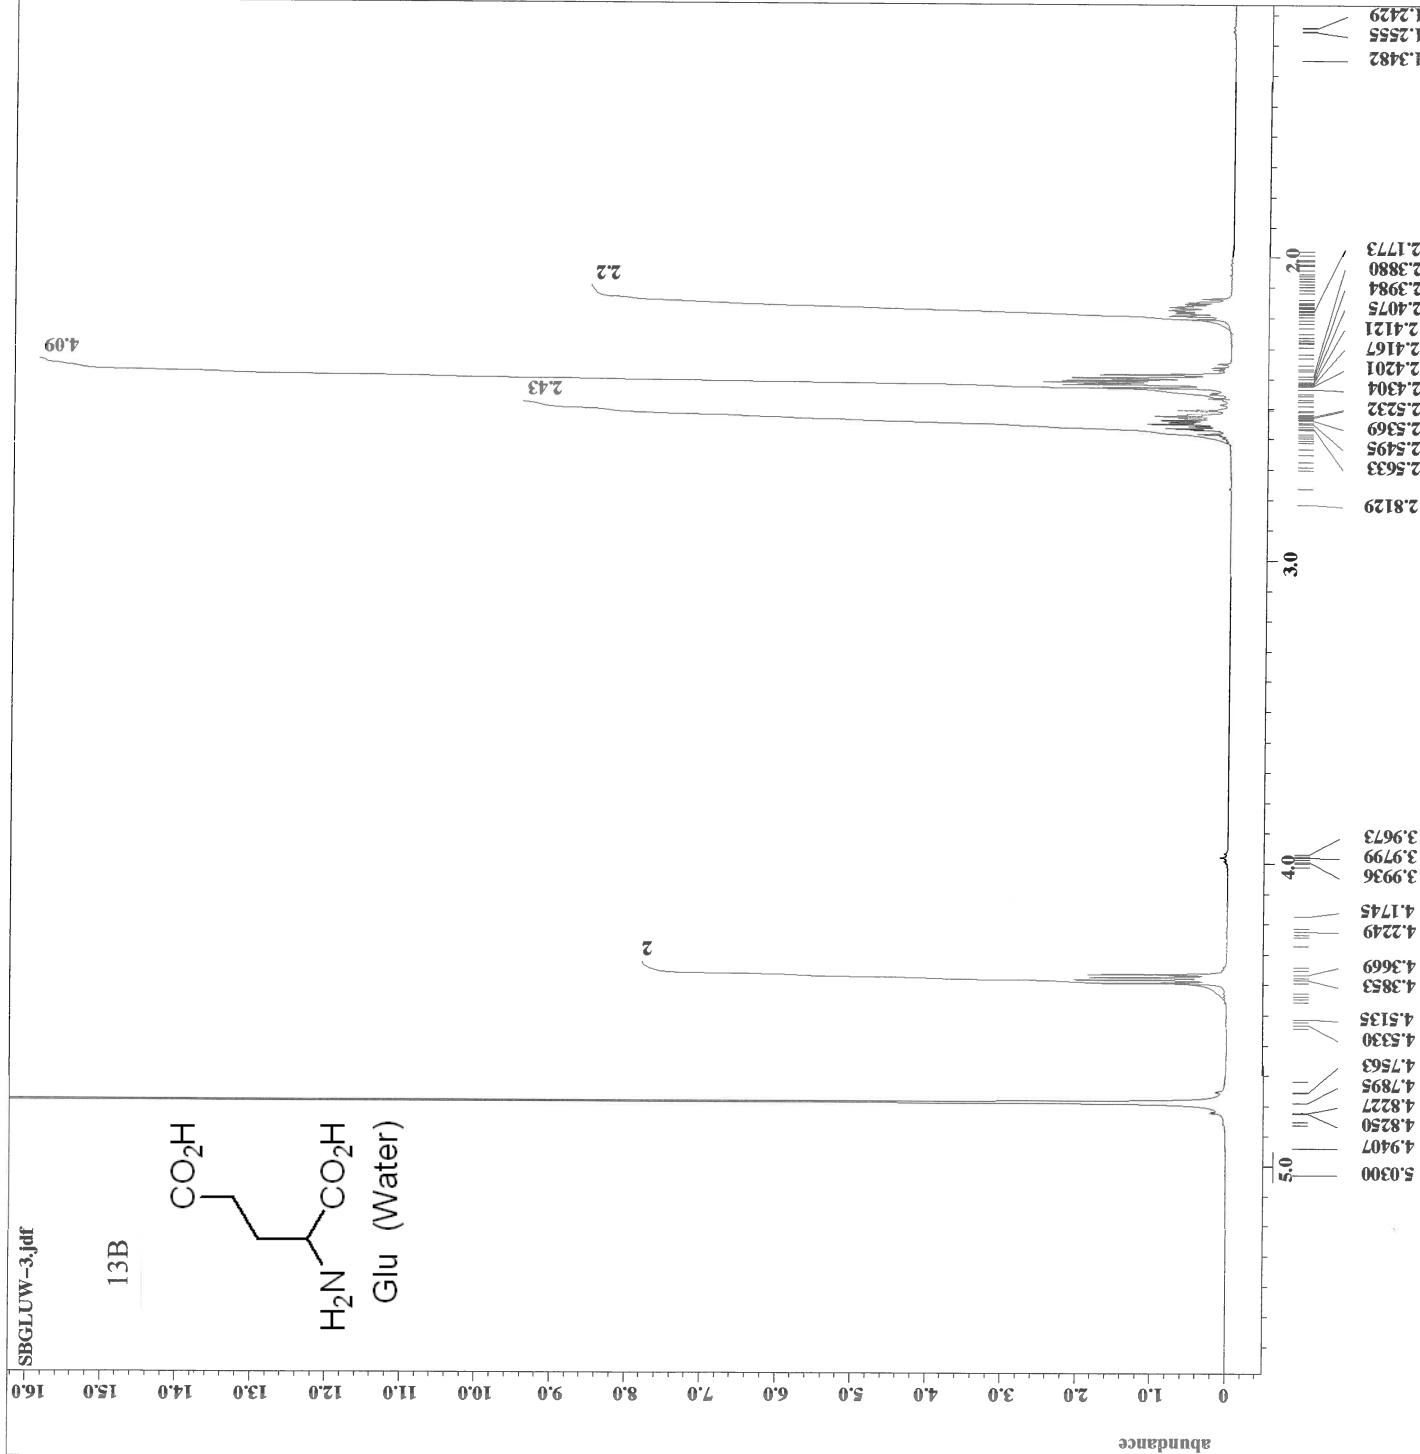

4.09

2.43

2.2

2

Filename = SBGLUW-3.jdf  
 Author = delta  
 Experiment = single\_pulse.ex2  
 Sample\_id = S#349238  
 Solvent = D2O  
 Creation\_time = 8-SEP-2015 22:29:20  
 Revision\_time = 8-SEP-2015 09:48:51  
 Current\_time = 8-SEP-2015 09:49:45  
 Comment = single\_pulse  
 Data\_format = ID COMPLEX  
 Dim\_size = 13107  
 Dim\_title = 1H  
 Dim\_units = [ppm]  
 Dimensions = X  
 Site = ECA 500  
 Spectrometer = JNM-ECA500  
 Field\_strength = 11.7473579[T] (500[MH  
 X\_acq\_duration = 1.74587904[s]  
 X\_domain = 1H  
 X\_freq = 500.15991521[MHz]  
 X\_offset = 5.0[ppm]  
 X\_points = 16384  
 X\_prescans = 0  
 X\_resolution = 0.57277737[Hz]  
 X\_sweep = 9.38438438[kHz]  
 Irr\_domain = 1H  
 Irr\_freq = 500.15991521[MHz]  
 Irr\_offset = 5.0[ppm]  
 Tri\_domain = 1H  
 Tri\_freq = 500.15991521[MHz]  
 Tri\_offset = 5.0[ppm]  
 Clipped = FALSE  
 Mod\_return = 1  
 Scans = 13  
 Total\_scans = 13  
 X\_90\_width = 12.54[us]  
 X\_acq\_time = 1.74587904[s]  
 X\_angle = 45[deg]  
 X\_atn = 4[db]  
 X\_pulse = 6.27[us]  
 Irr\_mode = Off  
 Irr\_mode = Off  
 Tri\_mode = FALSE  
 Dante\_presat = FALSE  
 Initial\_wait = 1[s]  
 Recvr\_gain = 40  
 Relaxation\_delay = 10[s]  
 Repetition\_time = 11.74587904[s]  
 Temp\_get = 21.3[DC]

X : parts per Million : 1H

13B

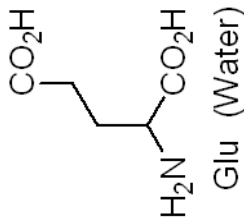

Filename = SBGLUWC-2.jdf  
 Author = delta  
 Experiment = single\_pulse\_dec  
 Sample\_id = S#351786  
 Solvent = D2O  
 Creation\_time = 8-SEP-2015 22:37:02  
 Revision\_time = 8-SEP-2015 09:53:35  
 Current\_time = 8-SEP-2015 09:53:52  
 Comment = single pulse decouple  
 Data\_format = 1D COMPLEX  
 Dim\_size = 26214  
 Dim\_title = 13C  
 Dim\_units = [ppm]  
 Dimensions = X  
 Site = ECA 500  
 Spectrometer = JNM-ECA500  
 Field\_strength = 11.7473579[T] (500[MH  
 X\_acq\_duration = 0.83361792[s]  
 X\_domain = 13C  
 X\_freq = 125.76529768[MHz]  
 X\_offset = 100[ppm]  
 X\_points = 32768  
 X\_prescans = 4  
 X\_resolution = 1.19959034[Hz]  
 X\_sweep = 39.3081761[kHz]  
 Irr\_domain = 1H  
 Irr\_freq = 500.15991521[MHz]  
 Irr\_offset = 5.0[ppm]  
 Clipped = FALSE  
 Mod\_return = 10  
 Scans = 310  
 Total\_scans = 310  
 X\_90\_width = 10.73[us]  
 X\_acq\_time = 0.83361792[s]  
 X\_angle = 30[deg]  
 X\_atn = 9[db]  
 X\_pulse = 3.57666667[us]  
 Irr\_atn\_dec = 20[db]  
 Irr\_atn\_noe = 20[db]  
 Irr\_noise = WALZ  
 Decoupling = TRUE  
 Initial\_wait = 1[s]  
 Noe = TRUE  
 Noe\_time = 0.5[s]  
 Recvr\_gain = 50  
 Relaxation\_delay = 0.5[s]  
 Repetition\_time = 1.33361792[s]  
 Temp\_get = 21.7[dc]

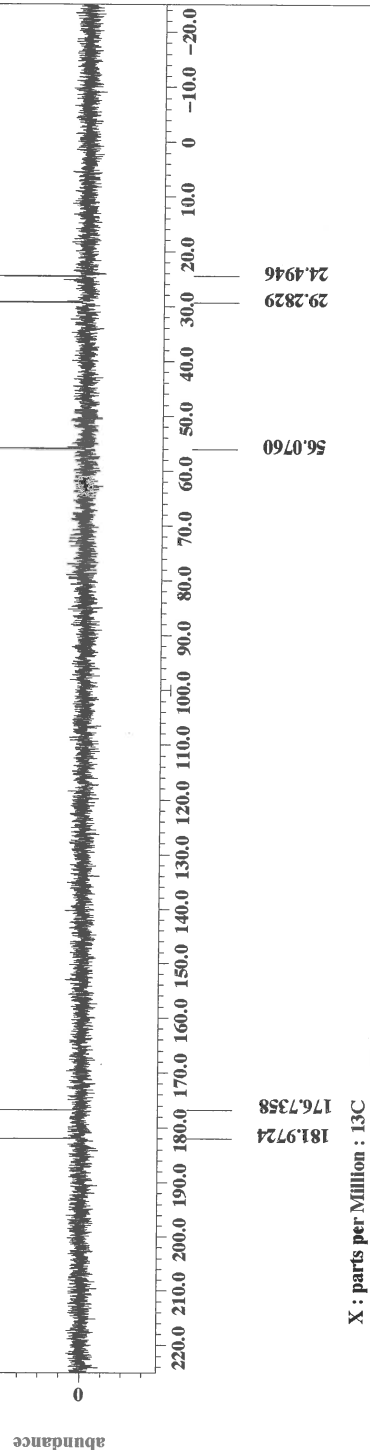

14B

H-Ala-Ala-OH (water)

3.01  
2.93

```

Filename = SBAAB2W-3.jdf
Author = delta
Experiment = single_pulse.ex2
Sample_id = S#703714
Solvent = D2O
Creation_time = 16-SEP-2015 08:21:00
Revision_time = 15-SEP-2015 19:40:30
Current_time = 15-SEP-2015 19:41:17

Comment = single_pulse
Data_format = 1D COMPLEX
Dim_size = 13107
Dim_title = 1H
Dim_units = [ppm]
Dimensions = X
Site = ECA 500
Spectrometer = JNM-ECA500

Field_strength = 11.7473579[T] (500[MH
X_acq_duration = 1.74587904[s]
X_domain = 1H
X_freq = 500.15991521[MHz]
X_offset = 5.0[ppm]
X_points = 16384
X_prescans = 0
X_resolution = 0.57277737[Hz]
X_sweep = 9.38438438[kHz]
Irr_domain = 1H
Irr_freq = 500.15991521[MHz]
Irr_offset = 5.0[ppm]
Tri_domain = 1H
Tri_freq = 500.15991521[MHz]
Tri_offset = 5.0[ppm]
Clipped = FALSE
Mod_return = 1
Scans = 16
Total_scans = 16

X_90_width = 12.54[us]
X_acq_time = 1.74587904[s]
X_angle = 45[deg]
X_atn = 4[db]
X_pulse = 6.27[us]
Irr_mode = Off
Tri_mode = Off
Dante_presat = FALSE
Initial_wait = 1[s]
Recvr_gain = 36
Relaxation_delay = 10[s]
Repetition_time = 11.74587904[s]
Temp_get = 21.2[dc]

```

0.98

6.0 5.0 4.0 3.0 2.0 1.0

4.8541  
4.8221  
4.7900  
4.7579  
4.1246  
4.1098  
4.0674  
4.0536  
4.0388  
4.0250  
3.7433  
3.5486  
3.5349  
2.4905  
2.2019  
1.9007  
1.5548  
1.5365  
1.5228  
1.3567  
1.3395  
1.3247  
1.1494  
1.1368

X : parts per Million : 1H

14B

H-Ala-Ala-OH (water)

Filename = SEAAWCB2-2.jdf  
Author = delta  
Experiment = single\_pulse\_dec  
Sample\_id = S#706822  
Solvent = D2O  
Creation\_time = 16-SEP-2015 08:36:56  
Revision\_time = 15-SEP-2015 19:53:44  
Current\_time = 15-SEP-2015 19:54:11  
Comment = single pulse decouple  
Data\_format = 1D COMPLEX  
Dim\_size = 26214  
Dim\_title = 13C  
Dim\_units = [ppm]  
Dimensions = X  
Site = ECA 500  
Spectrometer = JNM-ECA500  
Field\_strength = 11.7473579[T] (500[MH  
X\_acq\_duration = 0.83361792[s]  
X\_domain = 13C  
X\_freq = 125.76529768[MHz]  
X\_offset = 100[ppm]  
X\_points = 32768  
X\_prescans = 4  
X\_resolution = 1.19959034[Hz]  
X\_sweep = 39.3081761[kHz]  
Irr\_domain = 1H  
Irr\_freq = 500.15991521[MHz]  
Irr\_offset = 5.0[ppm]  
Clipped = FALSE  
Mod\_return = 10  
Scans = 860  
Total\_scans = 860  
X\_90\_width = 10.73[us]  
X\_acq\_time = 0.83361792[s]  
X\_angle = 30[deg]  
X\_atn = 9[dB]  
X\_pulse = 3.57666667[us]  
Irr\_atn\_dec = 20[dB]  
Irr\_atn\_noe = 20[dB]  
Irr\_noise = WALTZ  
Decoupling = TRUE  
Initial\_wait = 1[s]  
Noe = TRUE  
Noe\_time = 0.2[s]  
Recvr\_gain = 50  
Relaxation\_delay = 0.2[s]  
Repetition\_time = 1.03361792[s]  
Temp\_get = 21.6[DC]

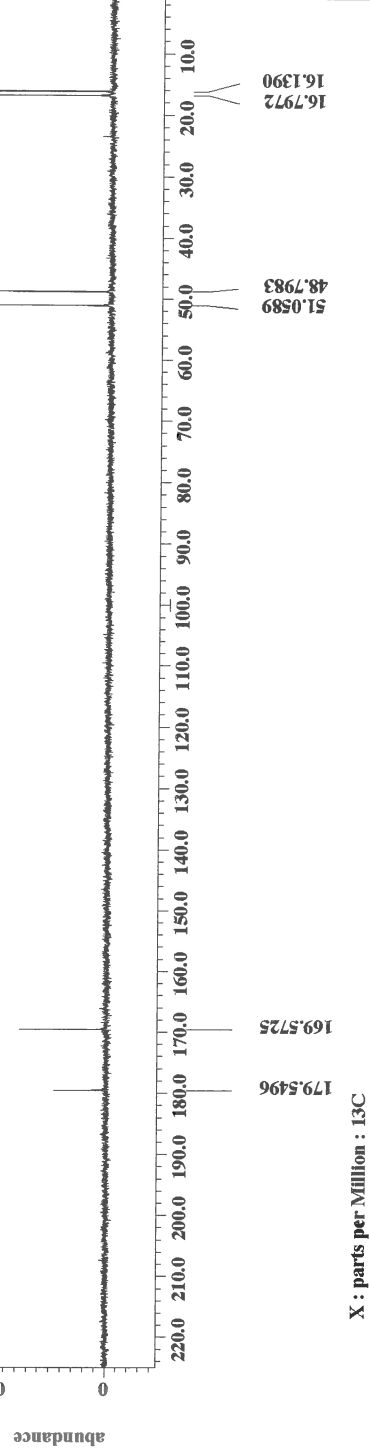

15B

# H-Gly-Val-OH (water)

6.22

```

Filename = SBGVW2H-3.jdf
Author = Delta
Experiment = single_pulse.ex2
Sample_id = S#384210
Solvent = D2O
Creation_time = 19-SEP-2015 23:28:27
Revision_time = 19-SEP-2015 10:47:55
Current_time = 19-SEP-2015 10:48:48

Comment = single_pulse
Data_format = 1D COMPLEX
Dim_size = 13107
Dim_title = 1H
Dim_units = [ppm]
Dimensions = X
Site = ECA 500
Spectrometer = JNM-ECA500

Field_strength = 11.7473579[T] (500[MH
X_acq_duration = 1.74587904[s]
X_domain = 1H
X_freq = 500.15991521[MHz]
X_offset = 5.0[ppm]
X_points = 16384
X_prescans = 0
X_resolution = 0.57277737[Hz]
X_sweep = 9.38438438[kHz]
Irr_domain = 1H
Irr_freq = 500.15991521[MHz]
Irr_offset = 5.0[ppm]
Tri_domain = 1H
Tri_freq = 500.15991521[MHz]
Tri_offset = 5.0[ppm]
Clipped = FALSE
Mod_return = 1
Scans = 15
Total_scans = 15

X_90_width = 12.54[us]
X_acq_time = 1.74587904[s]
X_angle = 45[deg]
X_atn = 4[db]
X_pulse = 6.27[us]
Irr_mode = Off
Tri_mode = Off
Dante_presat = FALSE
Initial_wait = 1[s]
Recvr_gain = 40
Relaxation_delay = 10[s]
Repetition_time = 11.74587904[s]
Temp_get = 21.1[dc]
    
```

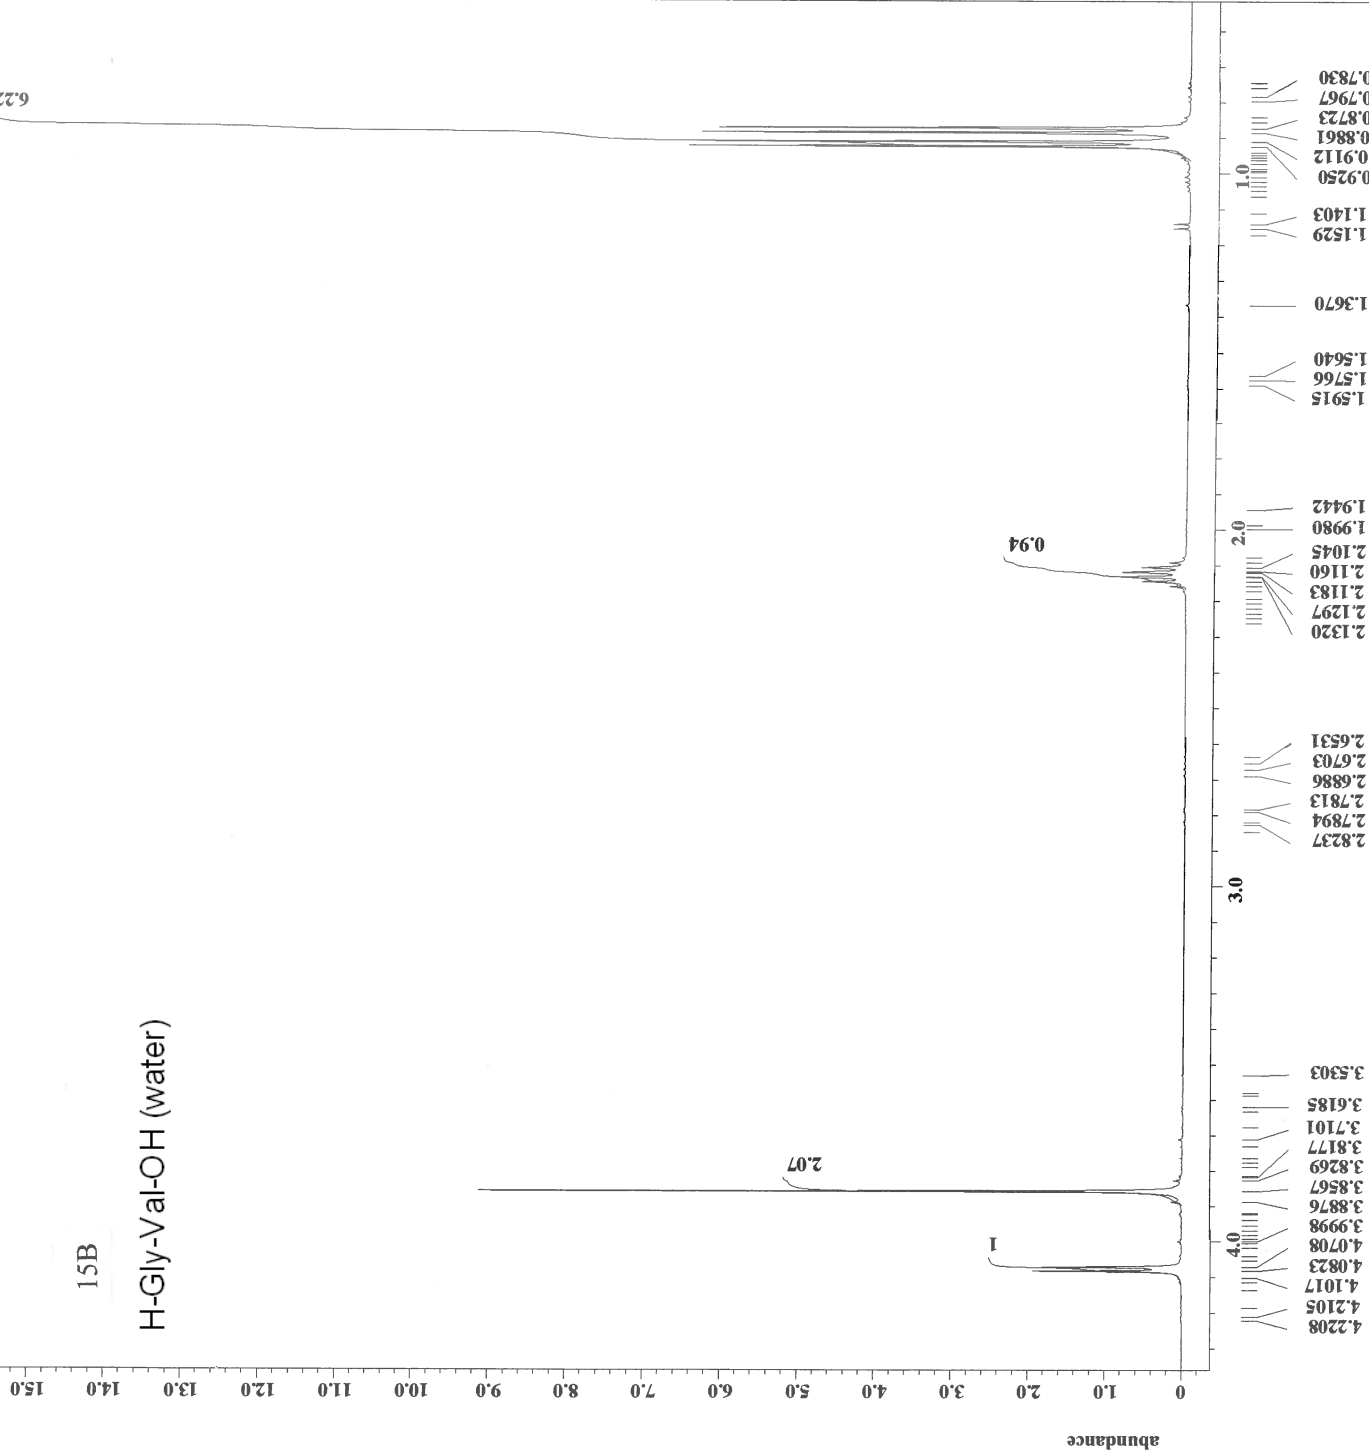

X : parts per Million : 1H

15B

H-Gly-Val-OH (water)

```

Filename      = SGBVW2HC-2.jdf
Author        = deita
Experiment    = single_pulse_dec
Sample_id     = S#387286
Solvent       = D2O
Creation_time = 19-SEP-2015 23:42:05
Revision_time = 19-SEP-2015 10:58:46
Current_time  = 19-SEP-2015 10:58:54

Comment       = single pulse decouple
Data_format   = 1D COMPLEX
Dim_size      = 26214
Dim_title     = 13C
Dim_units     = [ppm]
Dimensions    = X
Site          = ECA 500
Spectrometer  = JNM-ECA500

Field_strength = 11.7473579[T] (500[MH
X_acq_duration = 0.83361792[s]
X_domain       = 13C
X_freq         = 125.76529768[MHz]
X_offset       = 100[ppm]
X_points       = 32768
X_prescans     = 4
X_resolution   = 1.19959034[Hz]
X_sweep        = 39.3081761[kHz]
Irr_domain     = 1H
Irr_freq       = 500.15991521[MHz]
Irr_offset     = 5.0[ppm]
Clipped        = FALSE
Mod_return     = 10
Scans          = 720
Total_scans    = 720

X_90_width     = 10.73[us]
X_acq_time      = 0.83361792[s]
X_angle         = 30[deg]
X_atn           = 9[db]
X_pulse         = 3.57666667[us]
Irr_atn_dec     = 20[db]
Irr_atn_noe     = 20[db]
Irr_noise       = WALTZ
Decoupling      = TRUE
Initial_wait    = 1[s]
Noe              = TRUE
Noe_time        = 0.2[s]
Recvr_gain      = 50
Relaxation_delay = 0.2[s]
Repetition_time = 1.03361792[s]
Temp_get        = 21.6[dc]
    
```

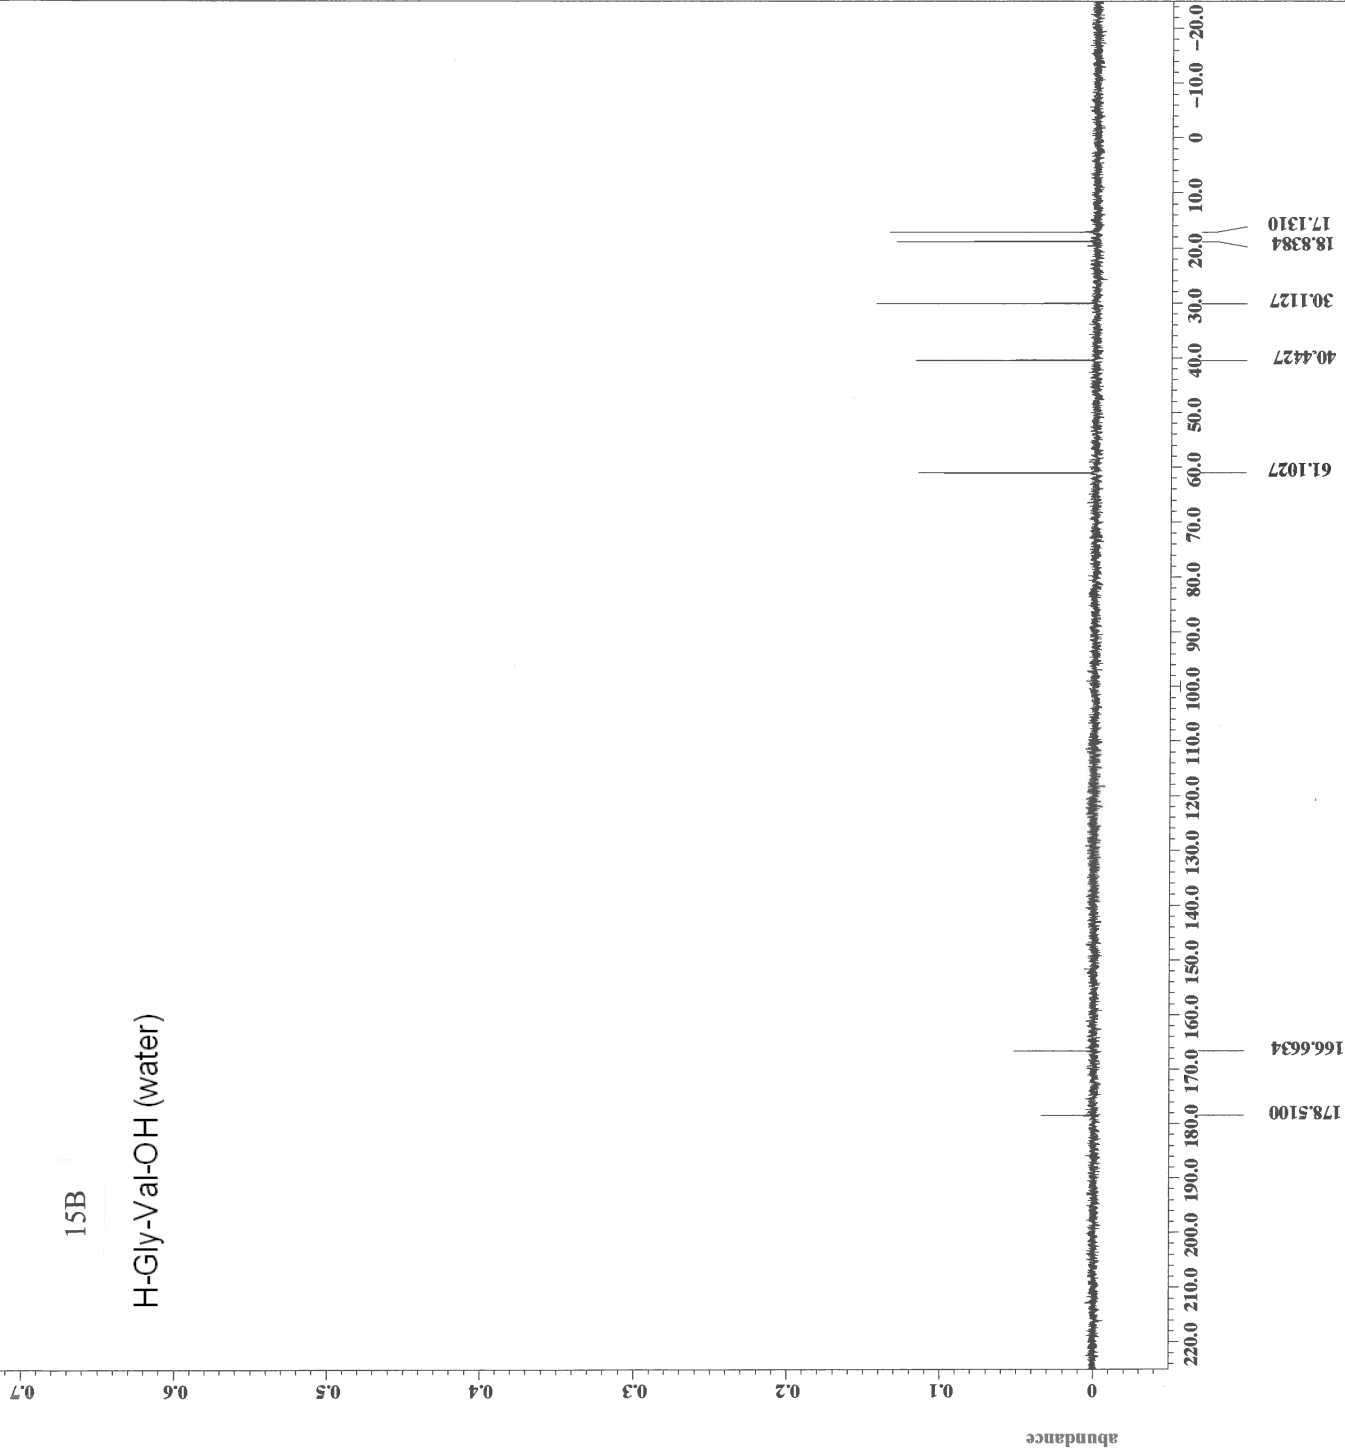

X : parts per Million : 13C

16 B

H-Gly-His-Lys-OH (water)

Filename = SETRIPEP-3.jdf  
 Author = delta  
 Experiment = single\_pulse.ex2  
 Sample\_id = S#714036  
 Solvent = D2O  
 Creation\_time = 22-SEP-2015 08:38:26  
 Revision\_time = 21-SEP-2015 19:59:17  
 Current\_time = 21-SEP-2015 19:59:49  
 Comment = single\_pulse  
 Data\_format = 1D COMPLEX  
 Dim\_size = 13107  
 Dim\_title = 1H  
 Dim\_units = [ppm]  
 Dimensions = X  
 Site = ECA 500  
 Spectrometer = JNM-ECA500  
 Field\_strength = 11.7473579[T] (500[MH  
 X\_acq\_duration = 1.74587904[s]  
 X\_domain = 1H  
 X\_freq = 500.15991521[MHz]  
 X\_offset = 5.0[ppm]  
 X\_points = 16384  
 X\_prescans = 0  
 X\_resolution = 0.57277737[Hz]  
 X\_sweep = 9.38438438[kHz]  
 Irr\_domain = 1H  
 Irr\_freq = 500.15991521[MHz]  
 Irr\_offset = 5.0[ppm]  
 Tri\_domain = 1H  
 Tri\_freq = 500.15991521[MHz]  
 Tri\_offset = 5.0[ppm]  
 Clipped = FALSE  
 Mod\_return = 1  
 Scans = 16  
 Total\_scans = 16  
 X\_90\_width = 12.54[us]  
 X\_acq\_time = 1.74587904[s]  
 X\_angle = 45[deg]  
 X\_atn = 4[db]  
 X\_pulse = 6.27[us]  
 Irr\_mode = Off  
 Tri\_mode = Off  
 Dante\_presat = FALSE  
 Initial\_wait = 1[s]  
 Recvr\_gain = 36  
 Relaxation\_delay = 10[s]  
 Repetition\_time = 11.74587904[s]  
 Temp\_get = 22.6[dc]

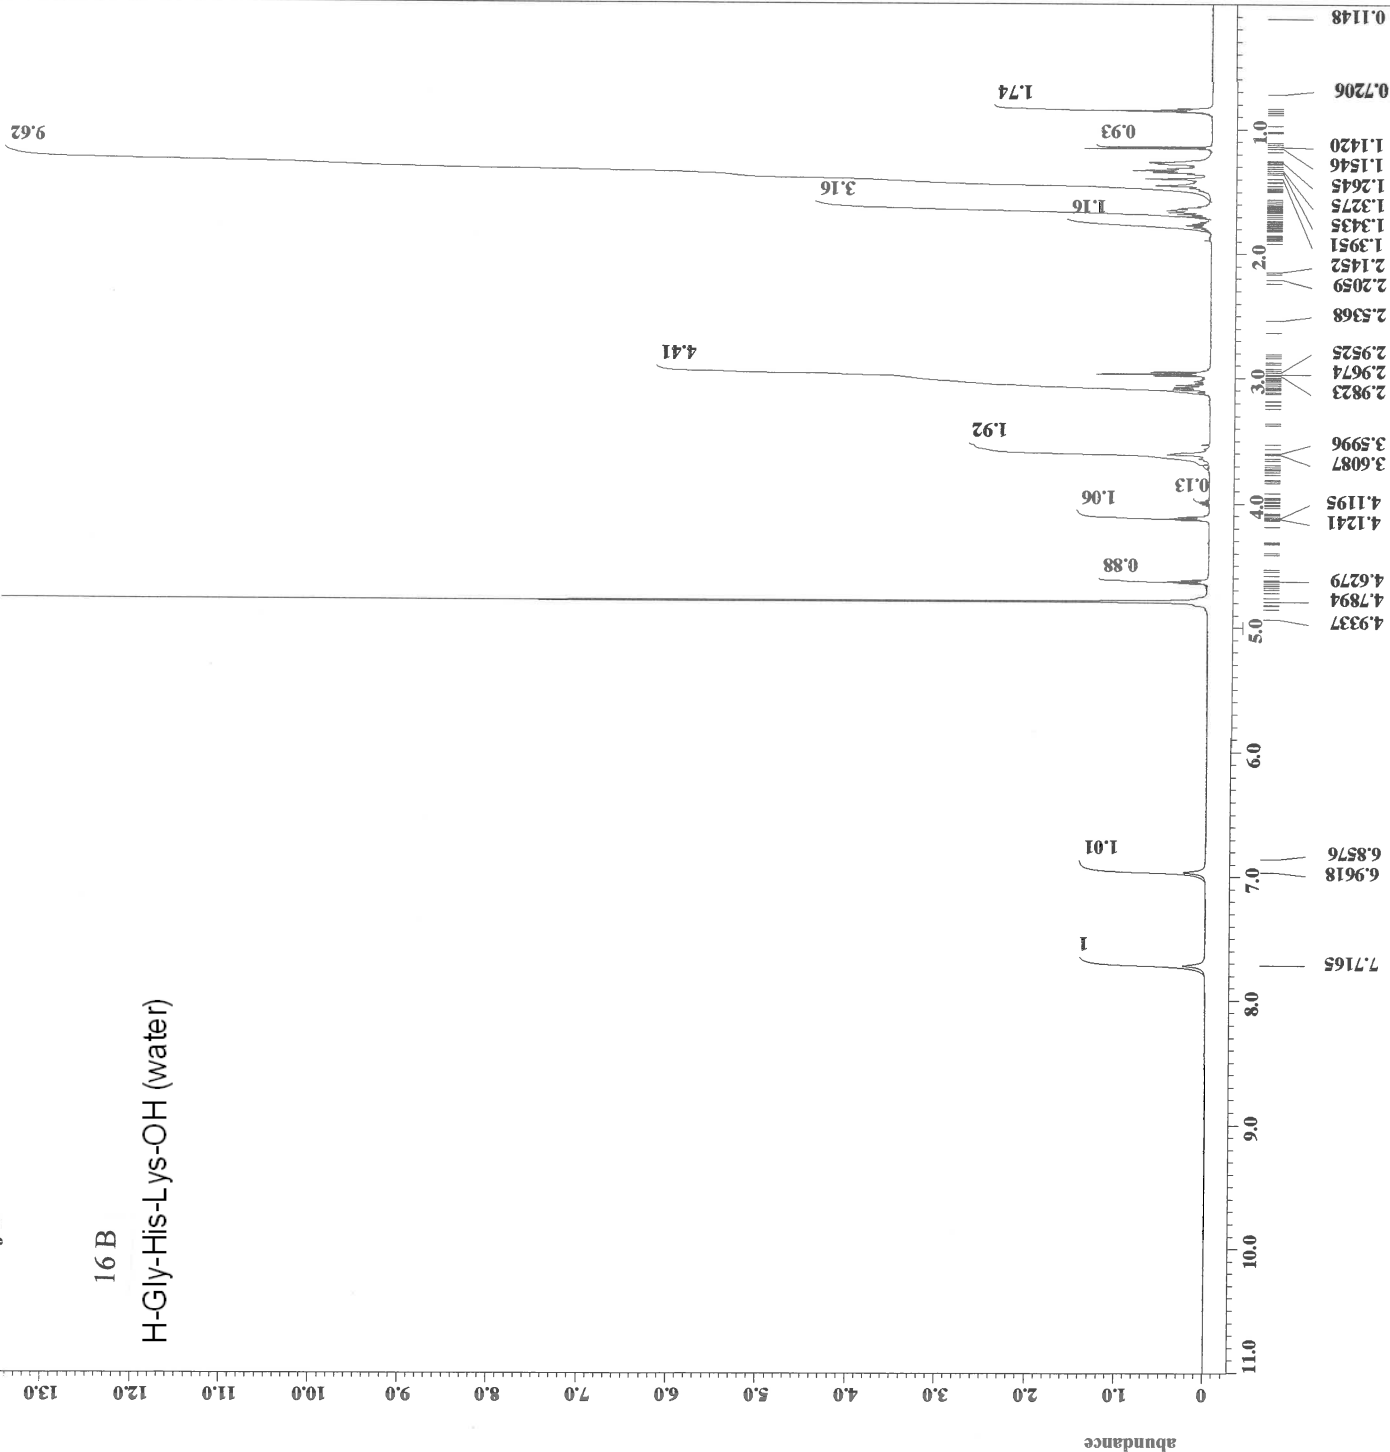

X : parts per Million : 1H

16B

H-Gly-His-Lys-OH (water)

0.2

0.1

0

abundance

180.0 170.0 160.0 150.0 140.0 130.0 120.0 110.0 100.0 90.0 80.0 70.0 60.0 50.0 40.0 30.0 20.0

175.2288  
171.1273  
166.6347  
162.8957  
162.6191  
127.5658  
117.2453  
114.9656  
78.3480  
64.0596  
52.6613  
52.3561  
40.0707  
38.9070  
32.6022  
29.7312  
26.4500  
25.9444  
23.4645  
21.7953

X : parts per Million : 13C

Filename = SBTRIPEPCW-2.jdf  
Author = delta  
Experiment = single\_pulse\_dec  
Sample\_id = S#359807  
Solvent = D2O  
Creation\_time = 23-SEP-2015 23:21:05  
Revision\_time = 23-SEP-2015 10:37:13  
Current\_time = 23-SEP-2015 10:37:39  
Comment = single pulse decouple  
Data\_format = 1D COMPLEX  
Dim\_size = 26214  
Dim\_title = 13C  
Dim\_units = [ppm]  
Dimensions = X  
Site = ECA 500  
Spectrometer = JNM-ECA500  
Field\_strength = 11.7473579[T] (500[MH  
X\_acq\_duration = 0.83361792[s]  
X\_domain = 13C  
X\_freq = 125.76529768[MHz]  
X\_offset = 100[ppm]  
X\_points = 32768  
X\_prescans = 4  
X\_resolution = 1.19959034[Hz]  
X\_sweep = 39.3081761[kHz]  
Irr\_domain = 1H  
Irr\_freq = 500.15991521[MHz]  
Irr\_offset = 5.0[ppm]  
Clipped = FALSE  
Mod\_return = 10  
Scans = 2150  
Total\_scans = 2150  
X\_90\_width = 10.73[us]  
X\_acq\_time = 0.83361792[s]  
X\_angle = 30[deg]  
X\_atn = 9[db]  
X\_pulse = 3.57666667[us]  
Irr\_atn\_dec = 20[db]  
Irr\_atn\_noe = 20[db]  
Irr\_noise = WALIZ  
Decoupling = TRUE  
Initial\_wait = 1[s]  
Noe = TRUE  
Noe\_time = 0.2[s]  
Recvr\_gain = 50  
Relaxation\_delay = 0.2[s]  
Repetition\_time = 1.03361792[s]  
Temp\_get = 22.5[dc]



1C

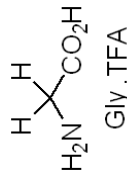

```

Filename      = SBGLYTFA-3.jdf
Author       = delta
Experiment   = single_pulse.ex2
Sample_id    = S#684782
Solvent      = D2O
Creation_time = 10-SEP-2015 07:48:33
Revision_time = 9-SEP-2015 19:06:33
Current_time  = 9-SEP-2015 19:07:56

Comment      = single_pulse
Data_format  = 1D COMPLEX
Dim_size     = 13107
Dim_title    = 1H
Dim_units    = [ppm]
Dimensions   = X
Site         = ECA 500
Spectrometer = JNM-ECA500

Field_strength = 11.7473579[T] (500[MH
X_acq_duration = 1.74587904[s]
X_domain       = 1H
X_freq         = 500.15991521[MHz]
X_offset       = 5.0[ppm]
X_points       = 16384
X_prescans     = 0
X_resolution   = 0.57277737[Hz]
X_sweep        = 9.38438438[kHz]
Irr_domain     = 1H
Irr_freq       = 500.15991521[MHz]
Irr_offset     = 5.0[ppm]
Tri_domain     = 1H
Tri_freq       = 500.15991521[MHz]
Tri_offset     = 5.0[ppm]
Clipped        = FALSE
Mod_return     = 1
Scans          = 8
Total_scans    = 8

X_90_width     = 12.54[us]
X_acq_time      = 1.74587904[s]
X_angle         = 45[deg]
X_atn           = 4[dB]
X_pulse         = 6.27[us]
Irr_mode        = Off
Tri_mode        = Off
Dante_presat    = FALSE
Initial_wait    = 1[s]
Recvr_gain      = 42
Relaxation_delay = 10[s]
Repetition_time = 11.74587904[s]
Temp_get        = 21.3[dc]

```

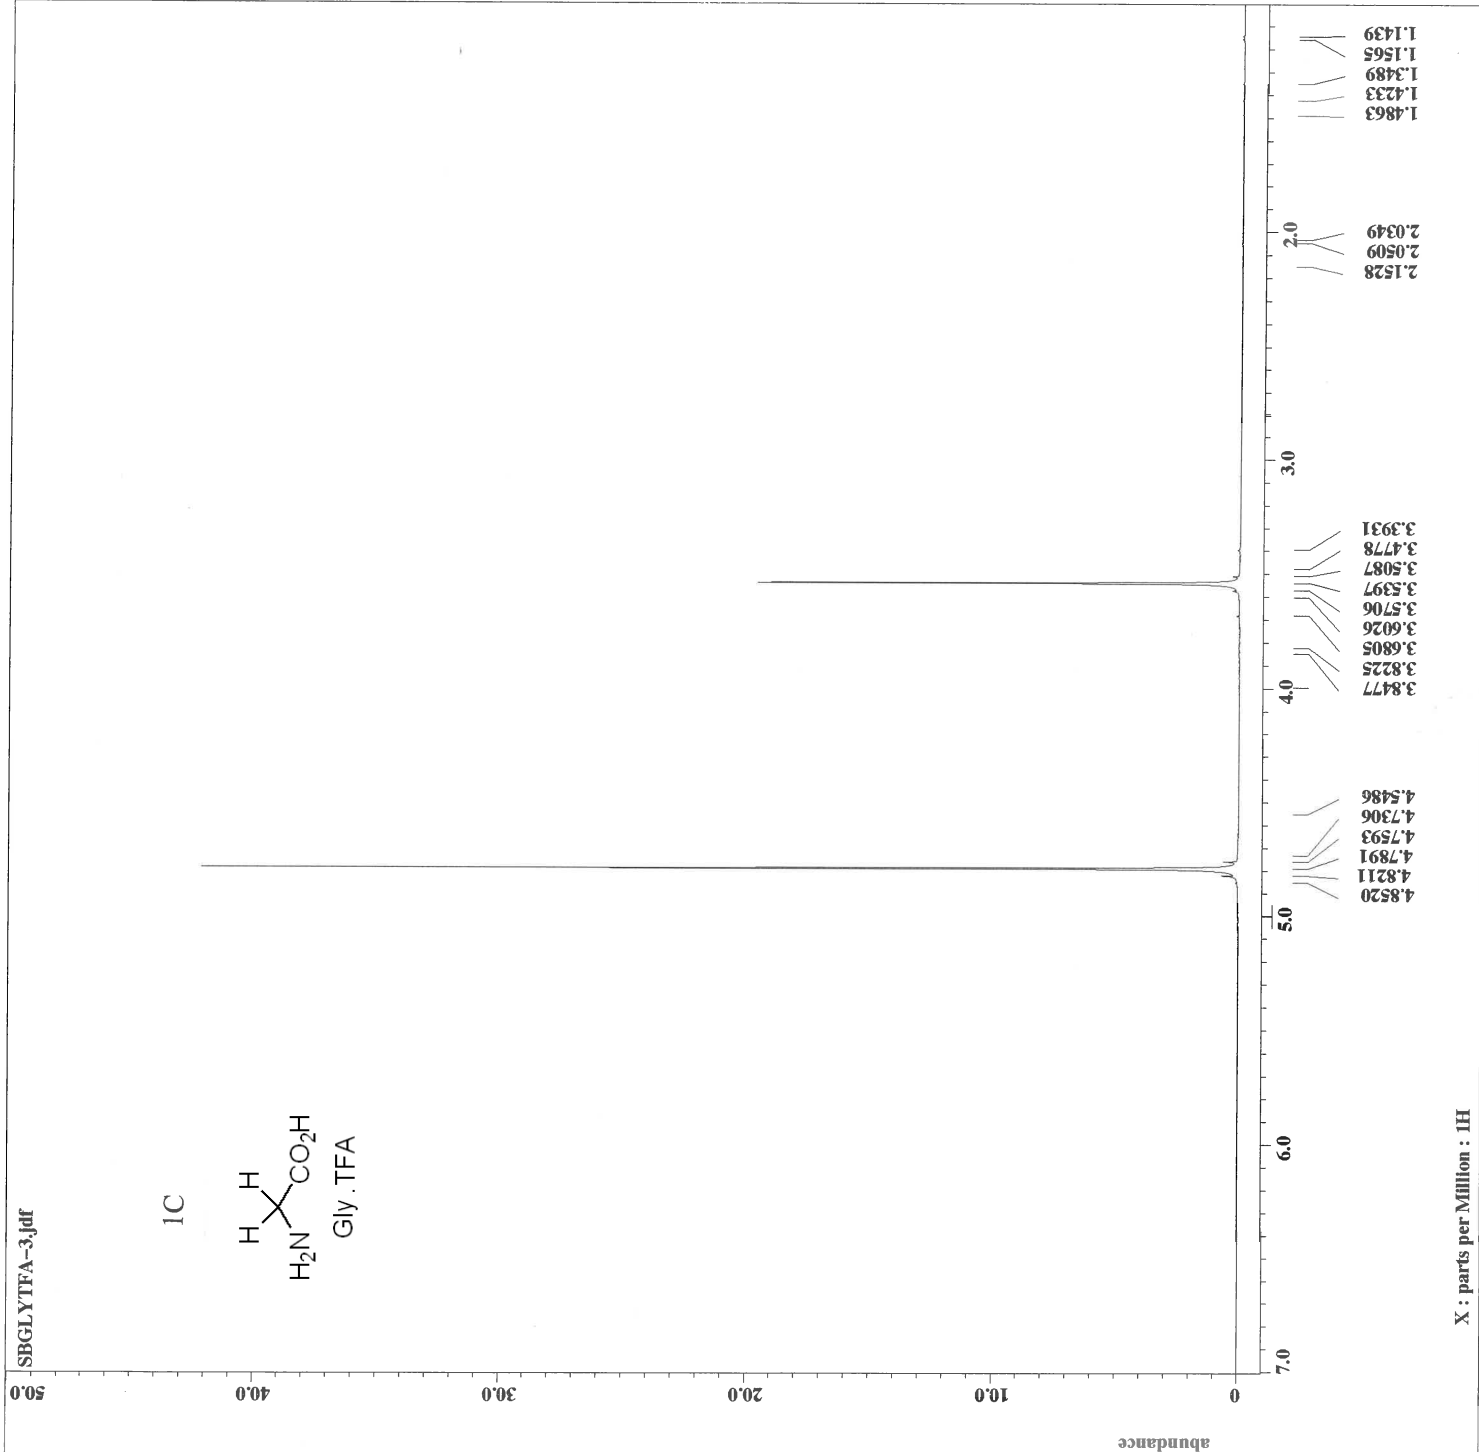

X : parts per Million : 1H

1C

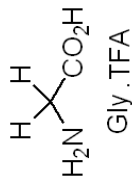

```

Filename      = SBGLYTFAC-2.jdf
Author       = delta
Experiment   = single_pulse_dec
Sample_id    = S#687420
Solvent      = D2O
Creation_time = 10-SEP-2015 07:56:49
Revision_time = 9-SEP-2015 19:13:06
Current_time  = 9-SEP-2015 19:15:19

Comment      = single pulse decouple
Data_format  = 1D COMPLEX
Dim_size     = 26214
Dim_title    = 13C
Dim_units    = [ppm]
Dimensions   = X
Site         = ECA 500
Spectrometer = JNM-ECA500

Field_strength = 11.7473579[T] (500[MH
X_acq_duration = 0.83361792[s]
X_domain       = 13C
X_freq         = 125.76529768[MHz]
X_offset       = 100[ppm]
X_points       = 32768
X_prescans     = 4
X_resolution   = 1.19959034[Hz]
X_sweep        = 39.3081761[kHz]
Irr_domain     = 1H
Irr_freq       = 500.15991521[MHz]
Irr_offset     = 5.0[ppm]
Clipped        = FALSE
Mod_return     = 10
Scans          = 420
Total_scans    = 420

X_90_width     = 10.73[us]
X_acq_time     = 0.83361792[s]
X_angle        = 30[deg]
X_atn          = 9[db]
X_pulse        = 3.57666667[us]
Irr_atn_dec    = 20[db]
Irr_atn_noe    = 20[db]
Irr_noise      = WALIZ
Decoupling     = TRUE
Initial_wait   = 1[s]
Noe            = TRUE
Noe_time       = 0.2[s]
Recvr_gain     = 50
Relaxation_delay = 0.2[s]
Repetition_time = 1.03361792[s]
Temp_get       = 21.8[dc]

```

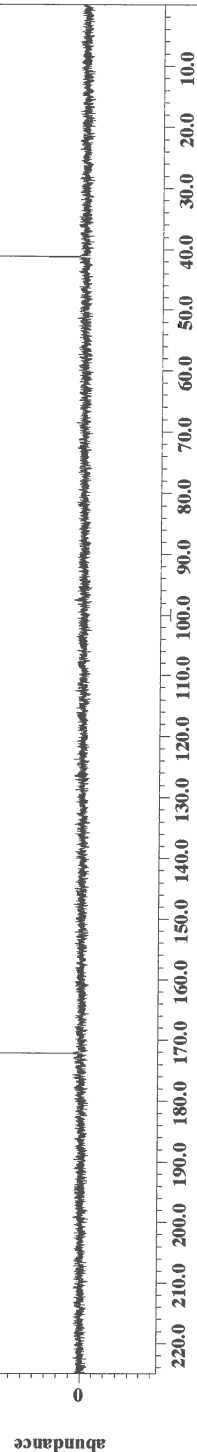

X : parts per Million : 13C

2C

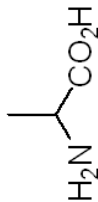

Ala.TFA

3.11

Filename = SBALATFA-3.jdf  
Author = delta  
Experiment = single\_pulse.ex2  
Sample\_id = S#729523  
Solvent = D2O  
Creation\_time = 11-SEP-2015 09:02:52  
Revision\_time = 10-SEP-2015 20:20:43  
Current\_time = 10-SEP-2015 20:21:35  
Comment = single\_pulse  
Data\_format = 1D COMPLEX  
Dim\_size = 13107  
Dim\_title = 1H  
Dim\_units = [ppm]  
Dimensions = X  
Site = ECA 500  
Spectrometer = JNM-ECA500  
Field\_strength = 11.7473579[T] (500[MH  
X\_acq\_duration = 1.74587904[s]  
X\_domain = 1H  
X\_freq = 500.15991521[MHz]  
X\_offset = 5.0[ppm]  
X\_points = 16384  
X\_prescans = 0  
X\_resolution = 0.57277737[Hz]  
X\_sweep = 9.38438438[kHz]  
Irr\_domain = 1H  
Irr\_freq = 500.15991521[MHz]  
Irr\_offset = 5.0[ppm]  
Tri\_domain = 1H  
Tri\_freq = 500.15991521[MHz]  
Tri\_offset = 5.0[ppm]  
Clipped = FALSE  
Mod\_return = 1  
Scans = 11  
Total\_scans = 11  
X\_90\_width = 12.54[us]  
X\_acq\_time = 1.74587904[s]  
X\_angle = 45[deg]  
X\_atn = 4[db]  
X\_pulse = 6.27[us]  
Irr\_mode = Off  
Tri\_mode = Off  
Dante\_presat = FALSE  
Initial\_wait = 1[s]  
Recvr\_gain = 34  
Relaxation\_delay = 10[s]  
Repetition\_time = 11.74587904[s]  
Temp\_get = 21.2[dc]

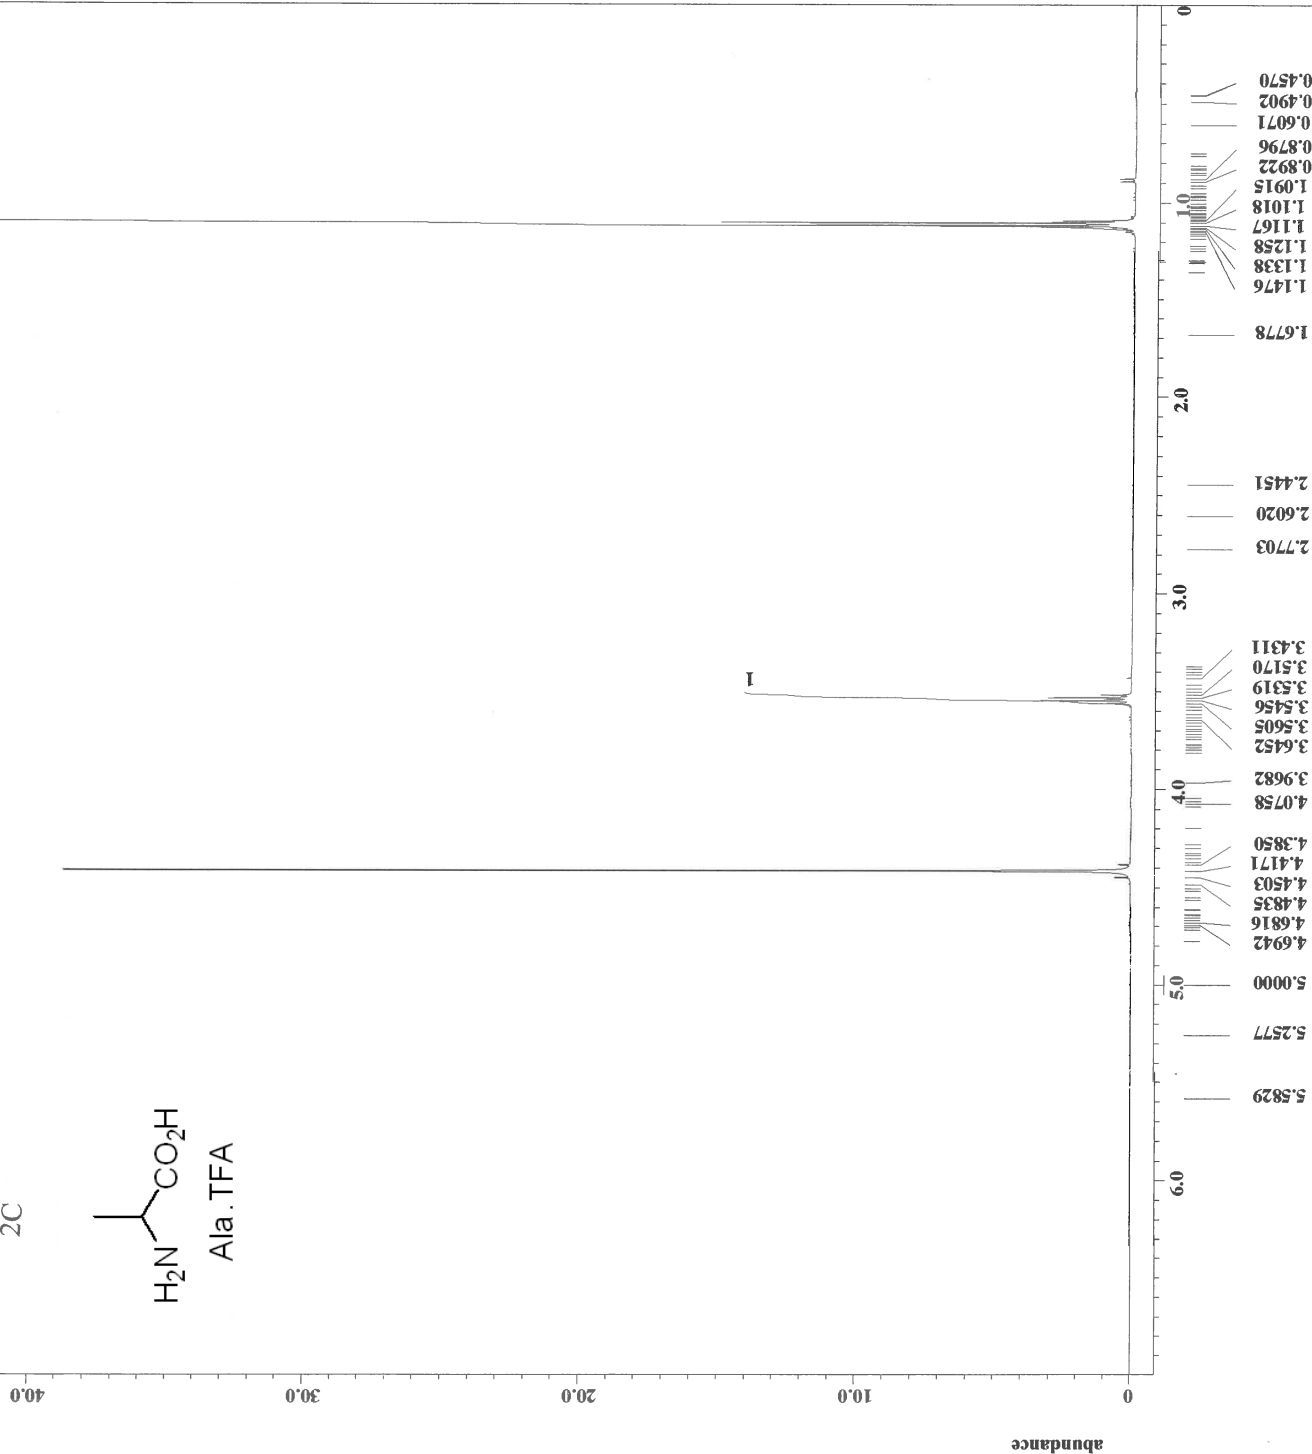

X : parts per Million : 1H

2C

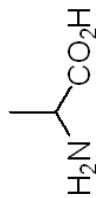

Ala.TFA

Filename = SBALATFAC-2.jdf  
Author = delta  
Experiment = single\_pulse\_dec  
Sample\_id = S#731862  
Solvent = D2O  
Creation\_time = 11-SEP-2015 09:10:54  
Revision\_time = 10-SEP-2015 20:27:27  
Current\_time = 10-SEP-2015 20:28:06  
Comment = single pulse decouple  
Data\_format = 1D COMPLEX  
Dim\_size = 26214  
Dim\_title = 13C  
Dim\_units = [ppm]  
Dimensions = X  
Site = ECA 500  
Spectrometer = JNM-ECA500  
Field\_strength = 11.7473579[T] (500[MH  
X\_acq\_duration = 0.83361792[s]  
X\_domain = 13C  
X\_freq = 125.76529768[MHz]  
X\_offset = 100[ppm]  
X\_points = 32768  
X\_prescans = 4  
X\_resolution = 1.19959034[Hz]  
X\_sweep = 39.3081761[kHz]  
Irr\_domain = 1H  
Irr\_freq = 500.15991521[MHz]  
Irr\_offset = 5.0[ppm]  
Clipped = FALSE  
Mod\_return = 10  
Scans = 420  
Total\_scans = 420  
X\_90\_width = 10.73[us]  
X\_acq\_time = 0.83361792[s]  
X\_angle = 30[deg]  
X\_atn = 9[db]  
X\_pulse = 3.57666667[us]  
Irr\_atn\_dec = 20[db]  
Irr\_atn\_noe = 20[db]  
Irr\_noise = WALFZ  
Decoupling = TRUE  
Initial\_wait = 1[s]  
Noe = TRUE  
Noe\_time = 0.2[s]  
Recvr\_gain = 50  
Relaxation\_delay = 0.2[s]  
Repetition\_time = 1.03361792[s]  
Temp\_get = 21.6[dc]

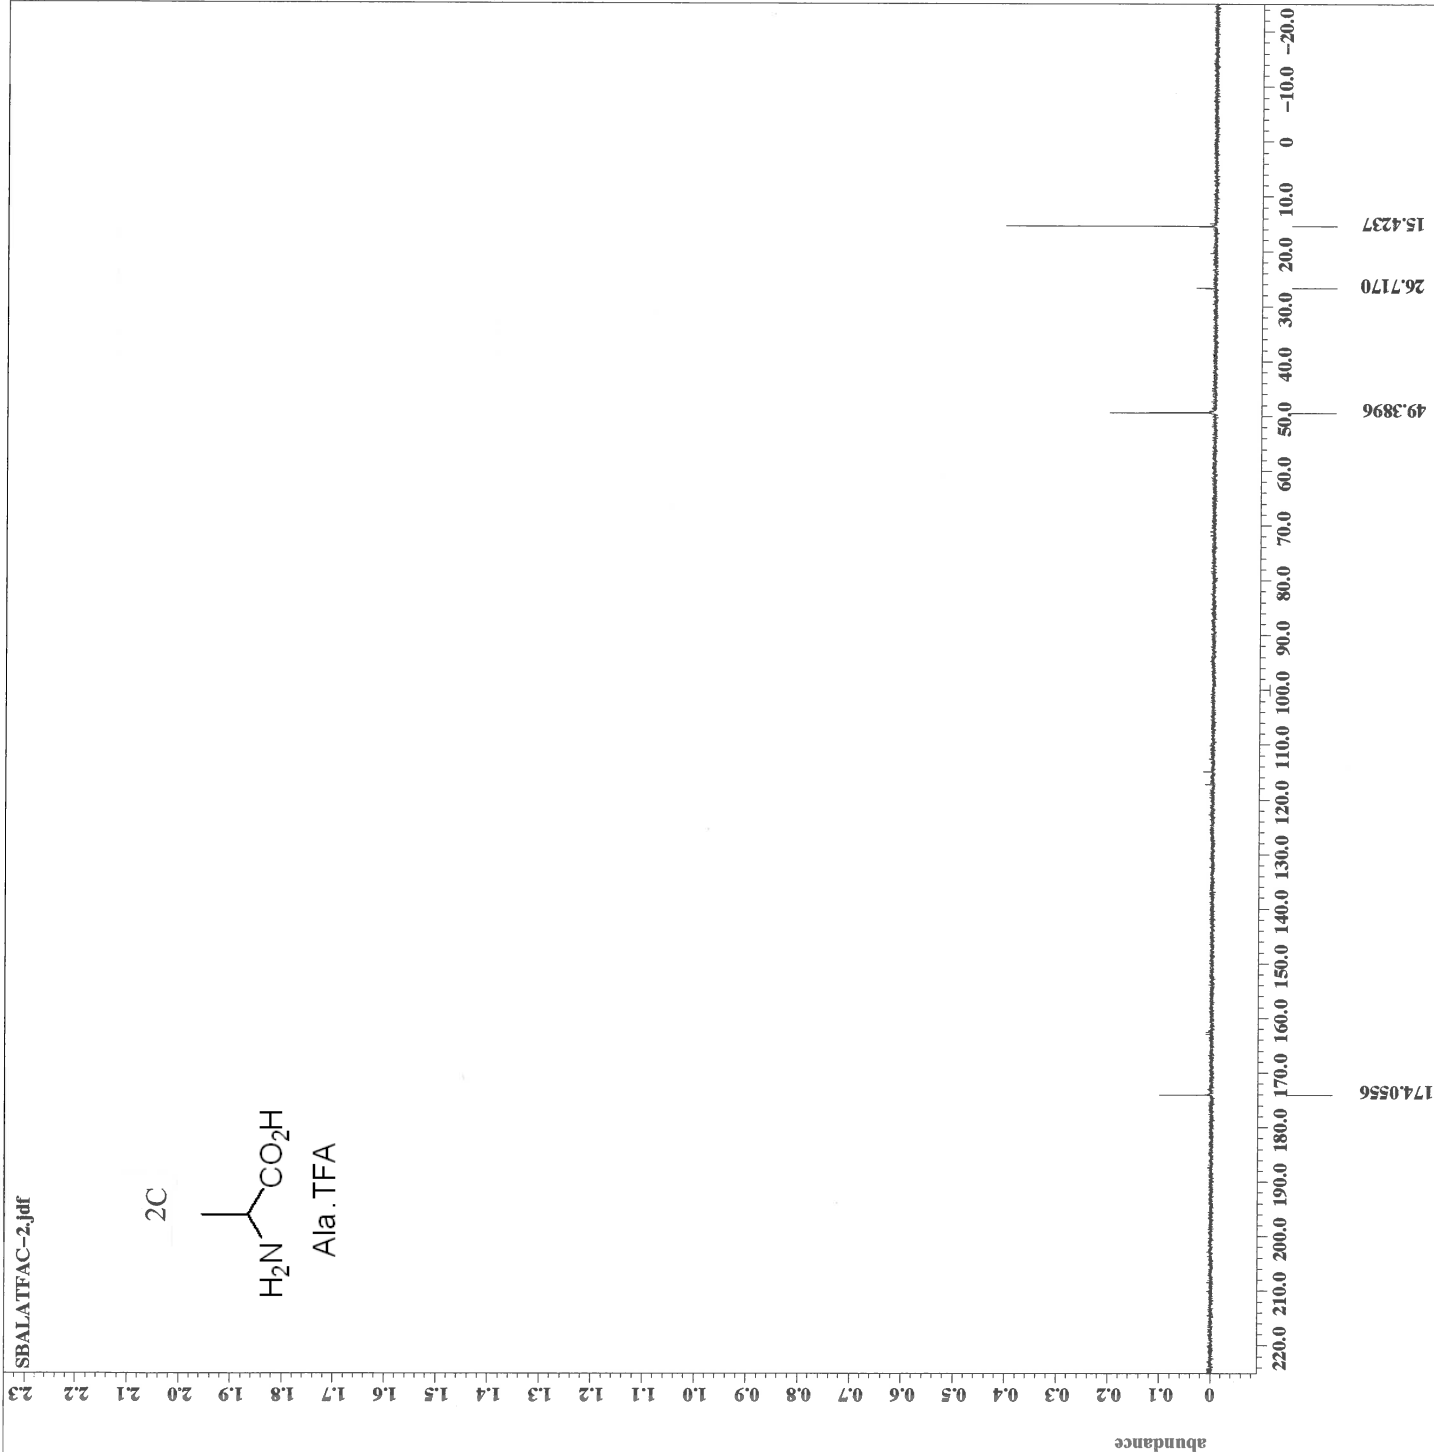

X : parts per Million : 13C

3C

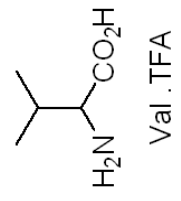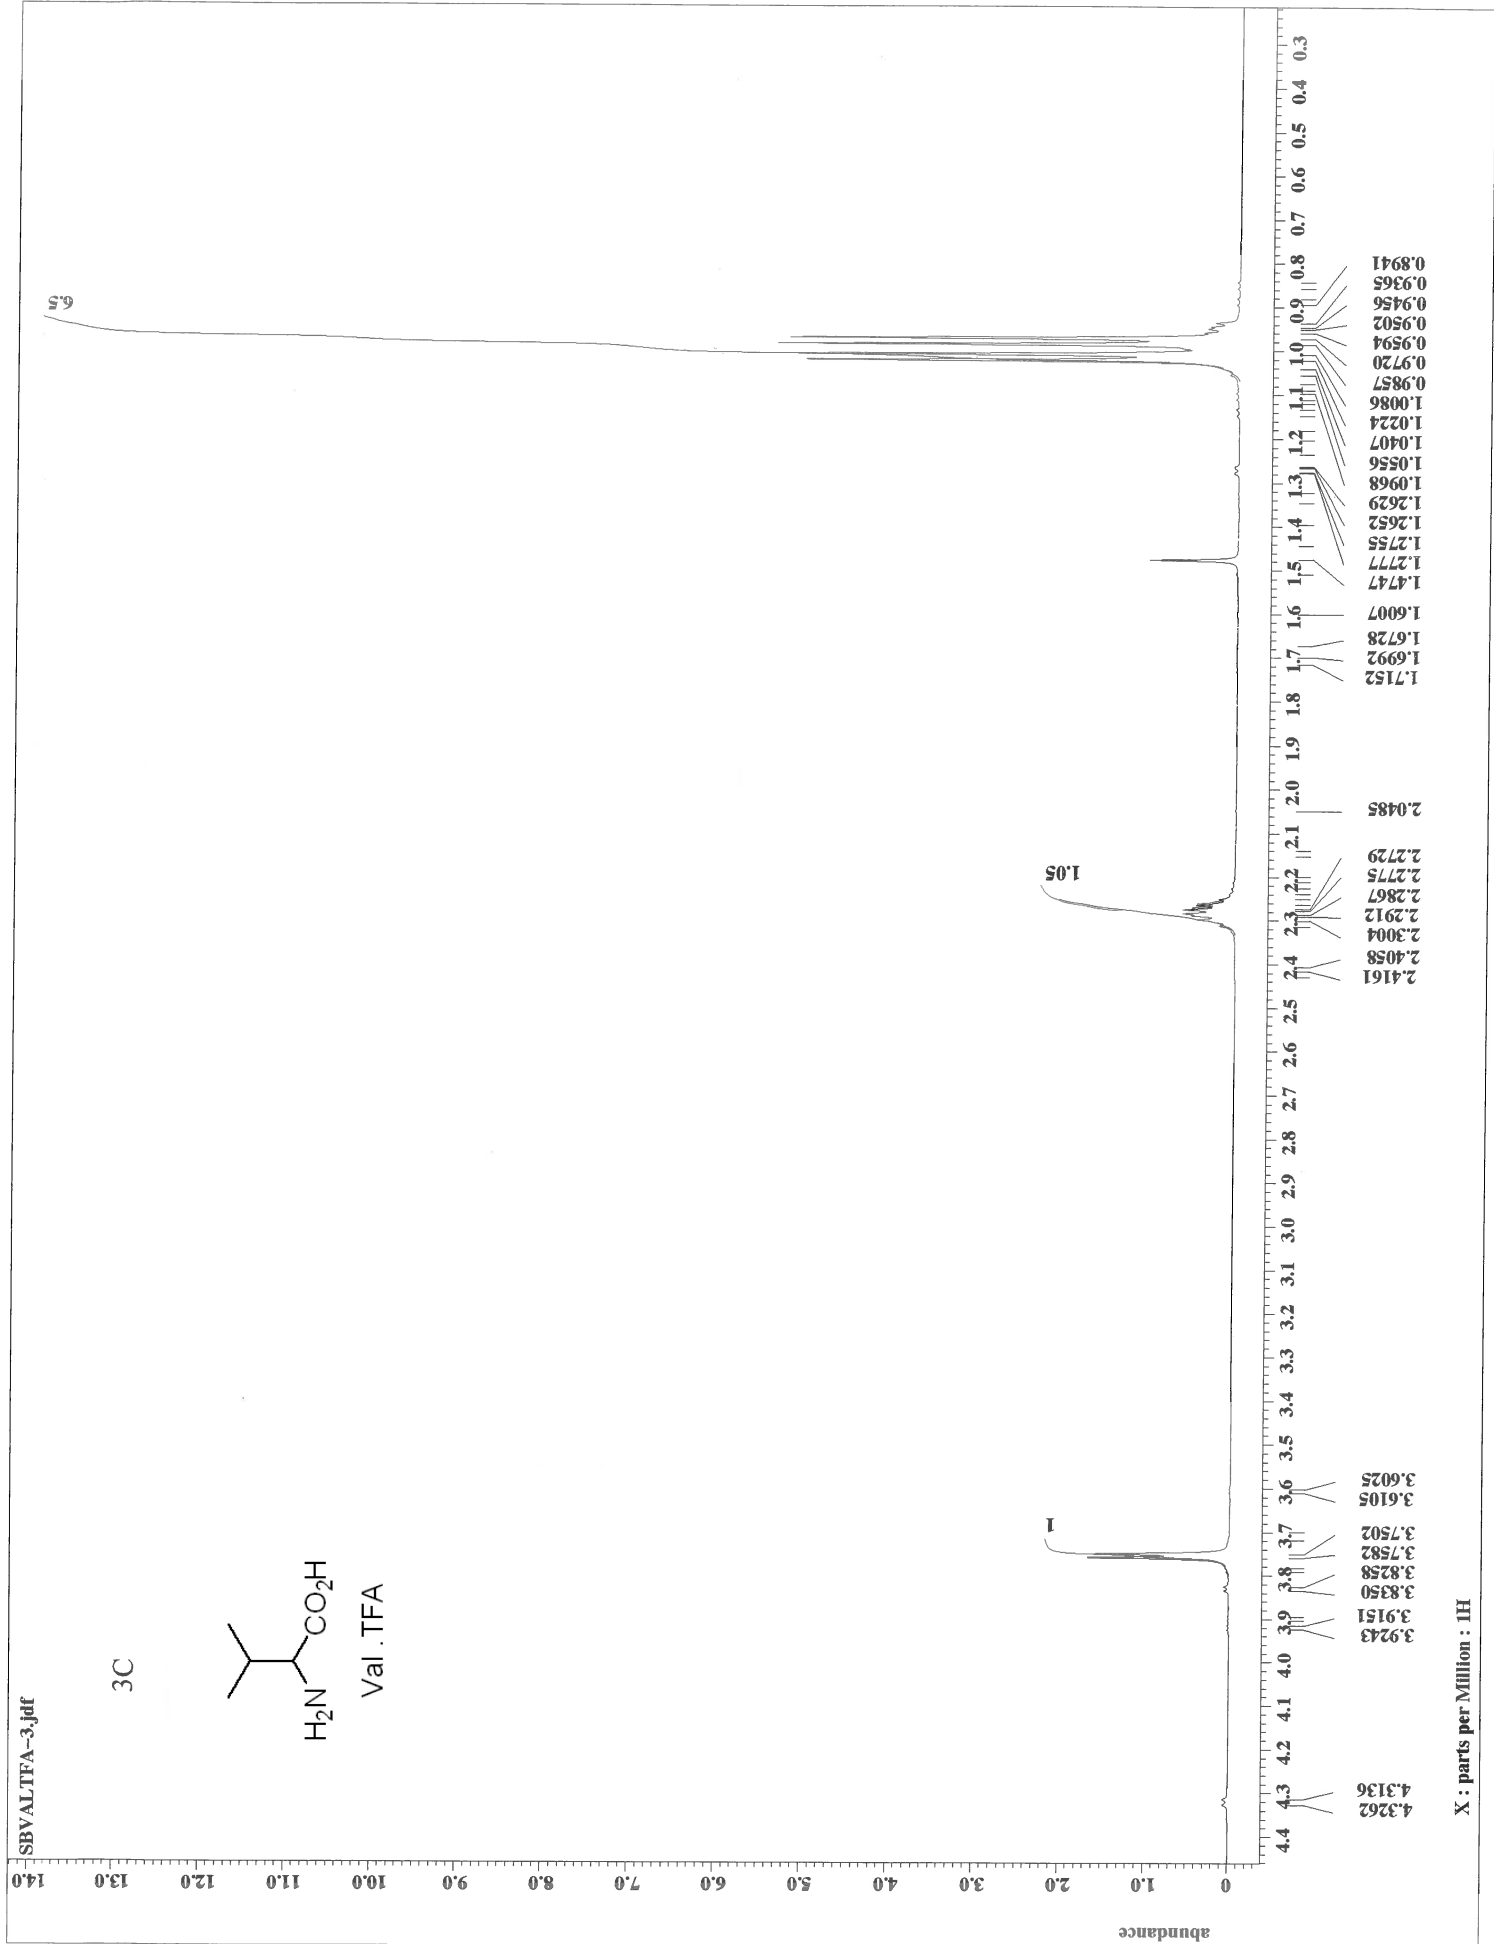

X : parts per Million : 1H

3C

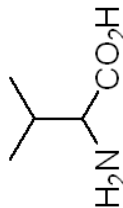

Val.TFA

Filename = SBVALTFAC-2.jdf  
Author = delta  
Experiment = single\_pulse\_dec  
Sample\_id = S#69773  
Solvent = D2O  
Creation\_time = 10-SEP-2015 08:16:46  
Revision\_time = 9-SEP-2015 19:33:43  
Current\_time = 9-SEP-2015 19:34:23  
Comment = single pulse decouple  
Data\_format = 1D COMPLEX  
Dim\_size = 26214  
Dim\_title = 13C  
Dim\_units = [ppm]  
Dimensions = X  
Site = ECA 500  
Spectrometer = JNM-ECA500  
Field\_strength = 11.7473579[T] (500[MH  
X\_acq\_duration = 0.83361792[s]  
X\_domain = 13C  
X\_freq = 125.76529768[MHz]  
X\_offset = 100[ppm]  
X\_points = 32768  
X\_prescans = 4  
X\_resolution = 1.19959034[Hz]  
X\_sweep = 39.3081761[kHz]  
Irr\_domain = 1H  
Irr\_freq = 500.15991521[MHz]  
Irr\_offset = 5.0[ppm]  
Clipped = FALSE  
Mod\_return = 10  
Scans = 640  
Total\_scans = 640  
X\_90\_width = 10.73[us]  
X\_acq\_time = 0.83361792[s]  
X\_angle = 30[deg]  
X\_atn = 9[dB]  
X\_pulse = 3.57666667[us]  
Irr\_atn\_dec = 20[dB]  
Irr\_atn\_noe = 20[dB]  
Irr\_noise = WALTZ  
Decoupling = TRUE  
Initial\_wait = 1[s]  
Noe = TRUE  
Noe\_time = 0.1[s]  
Recvr\_gain = 50  
Relaxation\_delay = 0.1[s]  
Repetition\_time = 0.93361792[s]  
Temp\_get = 21.7[dc]

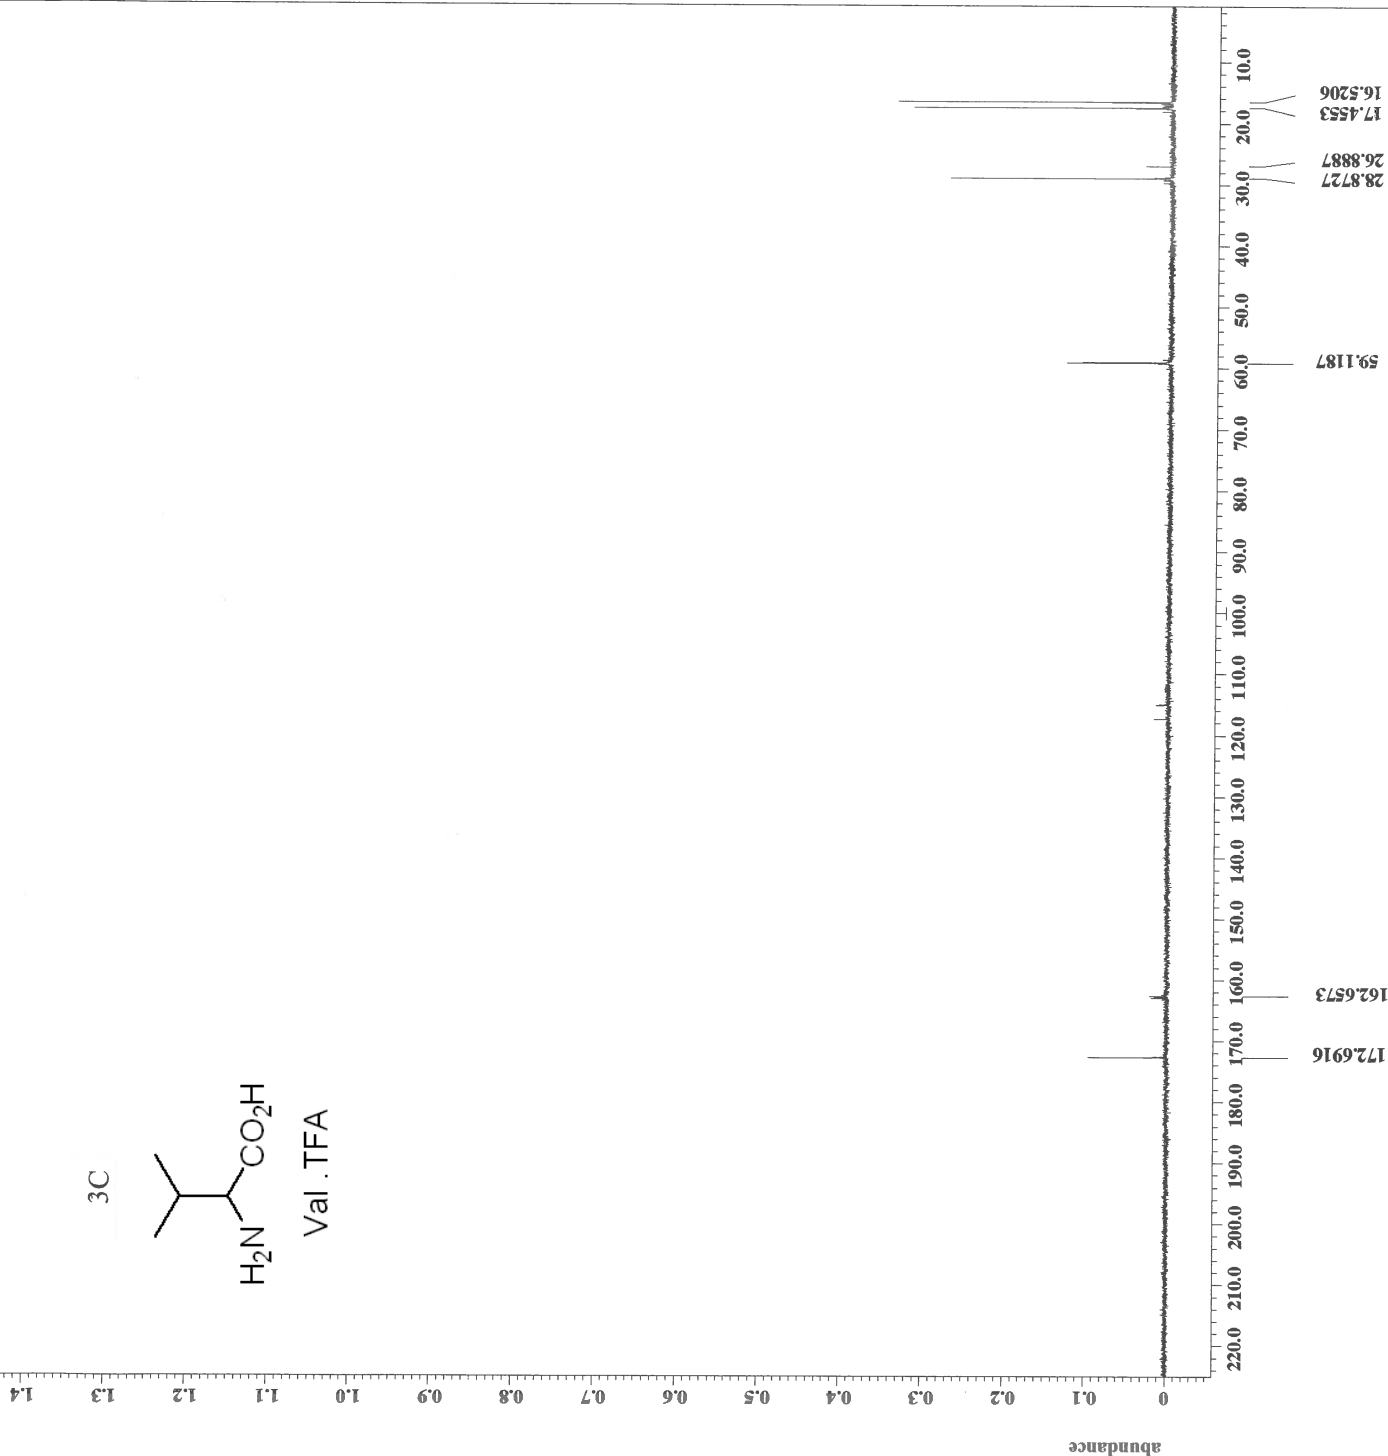

X : parts per Million : 13C

4C

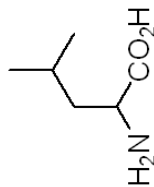

6.35

3.04

abundance

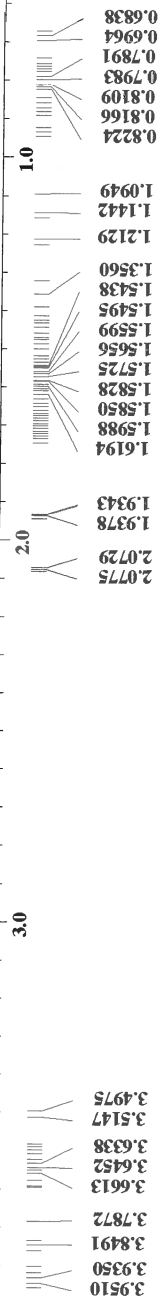

X : parts per Million : 1H

```

Filename = SBLEUTFA-3.jdf
Author = Delta
Experiment = single_pulse.ex2
Sample_id = S#720720
Solvent = D2O
Creation_time = 11-SEP-2015 08:47:59
Revision_time = 10-SEP-2015 20:06:27
Current_time = 10-SEP-2015 20:08:03

Comment = single_pulse
Data_format = 1D COMPLEX
Dim_size = 13107
Dim_title = 1H
Dim_units = [ppm]
Dimensions = X
Site = ECA 500
Spectrometer = JNM-ECA500

Field_strength = 11.7473579[T] (500[MH
X_acq_duration = 1.74587904[s]
X_domain = 1H
X_freq = 500.15991521[MHz]
X_offset = 5.0[ppm]
X_points = 16384
X_prescans = 0
X_resolution = 0.5727737[Hz]
X_sweep = 9.38438438[kHz]
Irr_domain = 1H
Irr_freq = 500.15991521[MHz]
Irr_offset = 5.0[ppm]
Tri_domain = 1H
Tri_freq = 500.15991521[MHz]
Tri_offset = 5.0[ppm]
Clipped = FALSE
Mod_return = 1
Scans = 10
Total_scans = 10

X_90_width = 12.54[us]
X_acq_time = 1.74587904[s]
X_angle = 45[deg]
X_atn = 4[db]
X_pulse = 6.27[us]
Irr_mode = Off
Tri_mode = Off
Dante_presat = FALSE
Initial_wait = 1[s]
Recvr_gain = 34
Relaxation_delay = 10[s]
Repetition_time = 11.74587904[s]
Temp_get = 21.2[dc]

```

4C

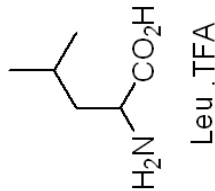

Filename = SBLEUTFAC-2.jdf  
Author = delta  
Experiment = single\_pulse\_dec  
Sample\_id = S#723009  
Solvent = D2O  
Creation\_time = 11-SEP-2015 08:54:15  
Revision\_time = 10-SEP-2015 20:11:01  
Current\_time = 10-SEP-2015 20:11:43  
Comment = single pulse decouple  
Data\_format = 1D COMPLEX  
Dim\_size = 26214  
Dim\_title = 13C  
Dim\_units = [ppm]  
Dimensions = X  
Site = ECA 500  
Spectrometer = JNM-ECA500  
Field\_strength = 11.7473579[T] (500[MH  
X\_acq\_duration = 0.83361792[s]  
X\_domain = 13C  
X\_freq = 125.76529768[MHz]  
X\_offset = 100[ppm]  
X\_points = 32768  
X\_prescans = 4  
X\_resolution = 1.19959034[Hz]  
X\_sweep = 39.3081761[kHz]  
Irr\_domain = 1H  
Irr\_freq = 500.15991521[MHz]  
Irr\_offset = 5.0[ppm]  
Clipped = FALSE  
Mod\_return = 10  
Scans = 310  
Total\_scans = 310  
X\_90\_width = 10.73[us]  
X\_acq\_time = 0.83361792[s]  
X\_angle = 30[deg]  
X\_atn = 9[db]  
X\_pulse = 3.57666667[us]  
Irr\_atn\_dec = 20[db]  
Irr\_atn\_noe = 20[db]  
Irr\_noise = WALFZ  
Decoupling = TRUE  
Initial\_wait = 1[s]  
Noe = TRUE  
Noe\_time = 0.2[s]  
Recvr\_gain = 50  
Relaxation\_delay = 0.2[s]  
Repetition\_time = 1.03361792[s]  
Temp\_get = 21.6[dc]

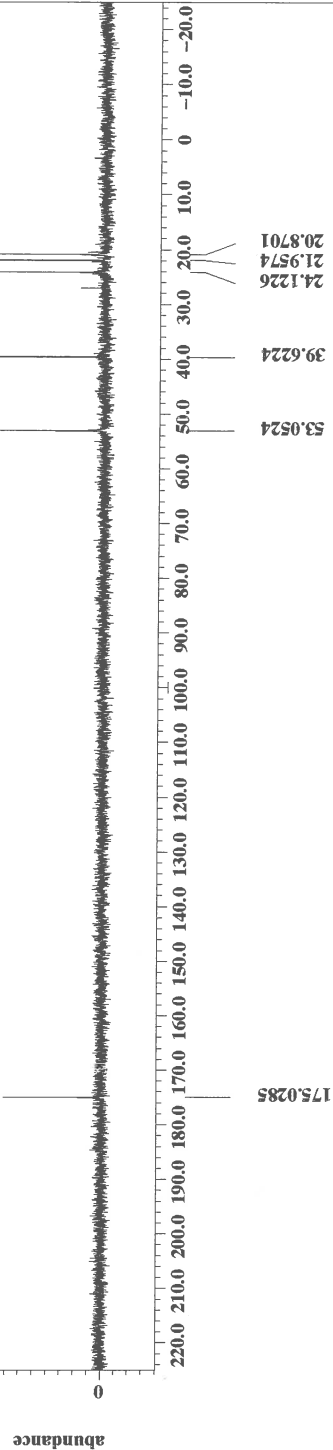



5C

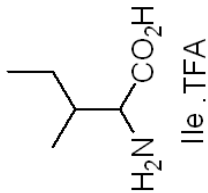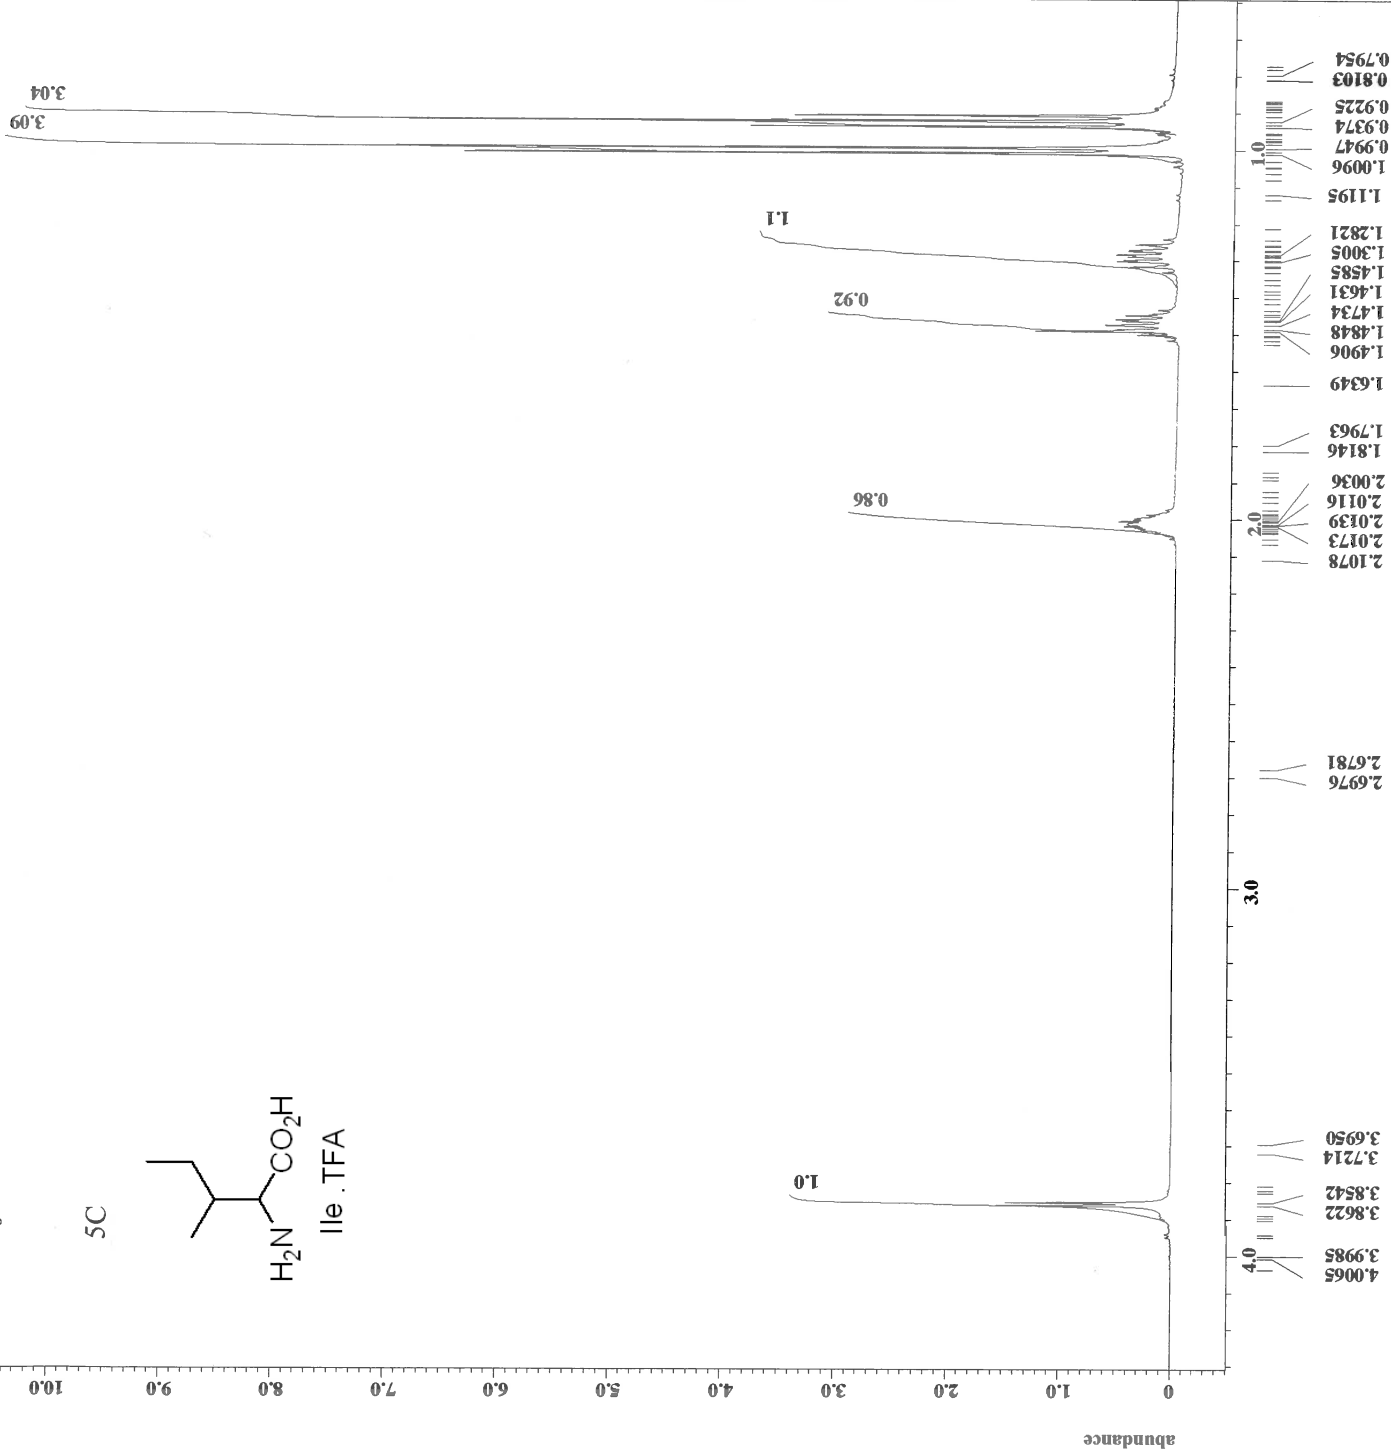

X : parts per Million : 1H

Filename = SBILECTFA-4.jdf  
 Author = delta  
 Experiment = single\_pulse.ex2  
 Sample\_id = S#728966  
 Solvent = D2O  
 Creation\_time = 27-SEP-2015 09:02:20  
 Revision\_time = 26-SEP-2015 20:23:54  
 Current\_time = 26-SEP-2015 20:23:56  
 Comment = single\_pulse  
 Data\_format = 1D COMPLEX  
 Dim\_size = 13107  
 Dim\_title = 1H  
 Dim\_units = [ppm]  
 Dimensions = X  
 Site = ECA 500  
 Spectrometer = JNM-ECA500  
 Field\_strength = 11.7473579[T] (500[MH  
 X\_acq\_duration = 1.74587904[s]  
 X\_domain = 1H  
 X\_freq = 500.15991521[MHz]  
 X\_offset = 5.0[ppm]  
 X\_points = 16384  
 X\_prescans = 0  
 X\_resolution = 0.57277737[Hz]  
 X\_sweep = 9.38438438[kHz]  
 Irr\_domain = 1H  
 Irr\_freq = 500.15991521[MHz]  
 Irr\_offset = 5.0[ppm]  
 Tri\_domain = 1H  
 Tri\_freq = 500.15991521[MHz]  
 Tri\_offset = 5.0[ppm]  
 Clipped = FALSE  
 Mod\_return = 1  
 Scans = 10  
 Total\_scans = 10  
 X\_90\_width = 12.54[us]  
 X\_acq\_time = 1.74587904[s]  
 X\_angle = 45[deg]  
 X\_atn = 4[dB]  
 X\_pulse = 6.27[us]  
 Irr\_mode = Off  
 Irr\_mode = Off  
 Dante\_presat = FALSE  
 Initial\_wait = 1[s]  
 Recvr\_gain = 36  
 Relaxation\_delay = 10[s]  
 Repetition\_time = 11.74587904[s]  
 Temp\_get = 21.6[dc]

5C

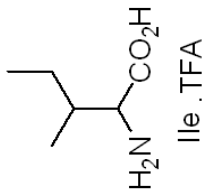

```

Filename      = SBILECTFA-2.jdf
Author        = delta
Experiment    = single_pulse_dec
Sample_id     = S#731232
Solvent       = D2O
Creation_time = 27-SEP-2015 09:27:10
Revision_time = 26-SEP-2015 20:43:10
Current_time  = 26-SEP-2015 20:45:11

Comment       = single pulse decouple
Data_format   = 1D COMPLEX
Dim_size      = 26214
Dim_title     = 13C
Dim_units     = [ppm]
Dimensions    = X
Site          = ECA 500
Spectrometer  = JNM-ECA500

Field strength = 11.7473579[T] (500[MH
X_acq_duration = 0.83361792[s]
X_domain       = 13C
X_freq         = 125.76529768[MHz]
X_offset       = 100[ppm]
X_points       = 32768
X_prescans     = 4
X_resolution   = 1.19959034[Hz]
X_sweep        = 39.3081761[kHz]
X_domain       = 1H
Irr_freq       = 500.15991521[MHz]
Irr_offset     = 5.0[ppm]
Clipped        = FALSE
Mod_return     = 10
Scans          = 1390
Total_scans    = 1390

X_90_width     = 10.73[us]
X_acq_time     = 0.83361792[s]
X_angle        = 30[deg]
X_atn          = 9[db]
X_pulse        = 3.57666667[us]
Irr_atn_dec    = 20[db]
Irr_atn_noe    = 20[db]
Irr_noise      = WALYZ
Decoupling     = TRUE
Initial_wait    = 1[s]
Noe            = TRUE
Noe_time       = 0.2[s]
Recvr_gain     = 50
Relaxation_delay = 0.2[s]
Repetition_time = 1.03361792[s]
Temp_get       = 22.1[dc]

```

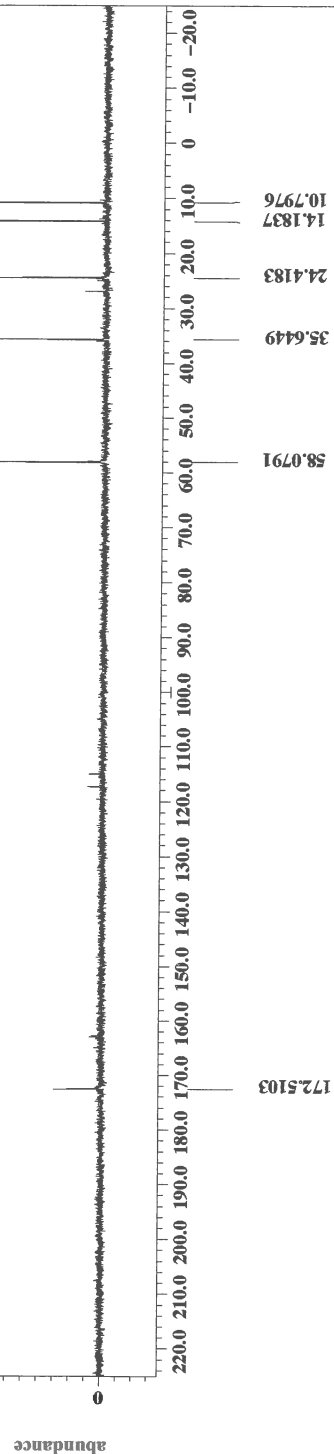

X : parts per Million : 13C

6C

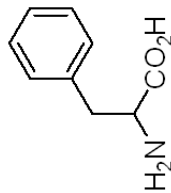

Phe.TFA

Filename = SBPATFA-3.jdf  
 Author = delta  
 Experiment = single\_pulse.ex2  
 Sample\_id = S#398428  
 Solvent = D2O  
 Creation\_time = 19-SEP-2015 23:52:20  
 Revision\_time = 19-SEP-2015 11:10:44  
 Current\_time = 19-SEP-2015 11:11:11  
 Comment = single\_pulse  
 Data\_format = 1D COMPLEX  
 Dim\_size = 13107  
 Dim\_title = 1H  
 Dim\_units = [ppm]  
 Dimensions = X  
 Site = ECA 500  
 Spectrometer = JNM-ECA500  
 Field\_strength = 11.7473579[T] (500[MH  
 X\_acq\_duration = 1.74587904[s]  
 X\_domain = 1H  
 X\_freq = 500.15991521[MHz]  
 X\_offset = 5.0[ppm]  
 X\_points = 16384  
 X\_prescans = 0  
 X\_resolution = 0.57277737[Hz]  
 X\_sweep = 9.38438438[kHz]  
 Irr\_domain = 1H  
 Irr\_freq = 500.15991521[MHz]  
 Irr\_offset = 5.0[ppm]  
 Tri\_domain = 1H  
 Tri\_freq = 500.15991521[MHz]  
 Tri\_offset = 5.0[ppm]  
 Clipped = FALSE  
 Mod\_return = 1  
 Scans = 16  
 Total\_scans = 16  
 X\_90\_width = 12.54[us]  
 X\_acq\_time = 1.74587904[s]  
 X\_angle = 45[deg]  
 X\_atn = 4[db]  
 X\_pulse = 6.27[us]  
 Irr\_mode = Off  
 Tri\_mode = Off  
 Dante\_presat = FALSE  
 Initial\_wait = 1[s]  
 Recvr\_gain = 40  
 Relaxation\_delay = 10[s]  
 Repetition\_time = 11.74587904[s]  
 Temp\_get = 21.2[dc]

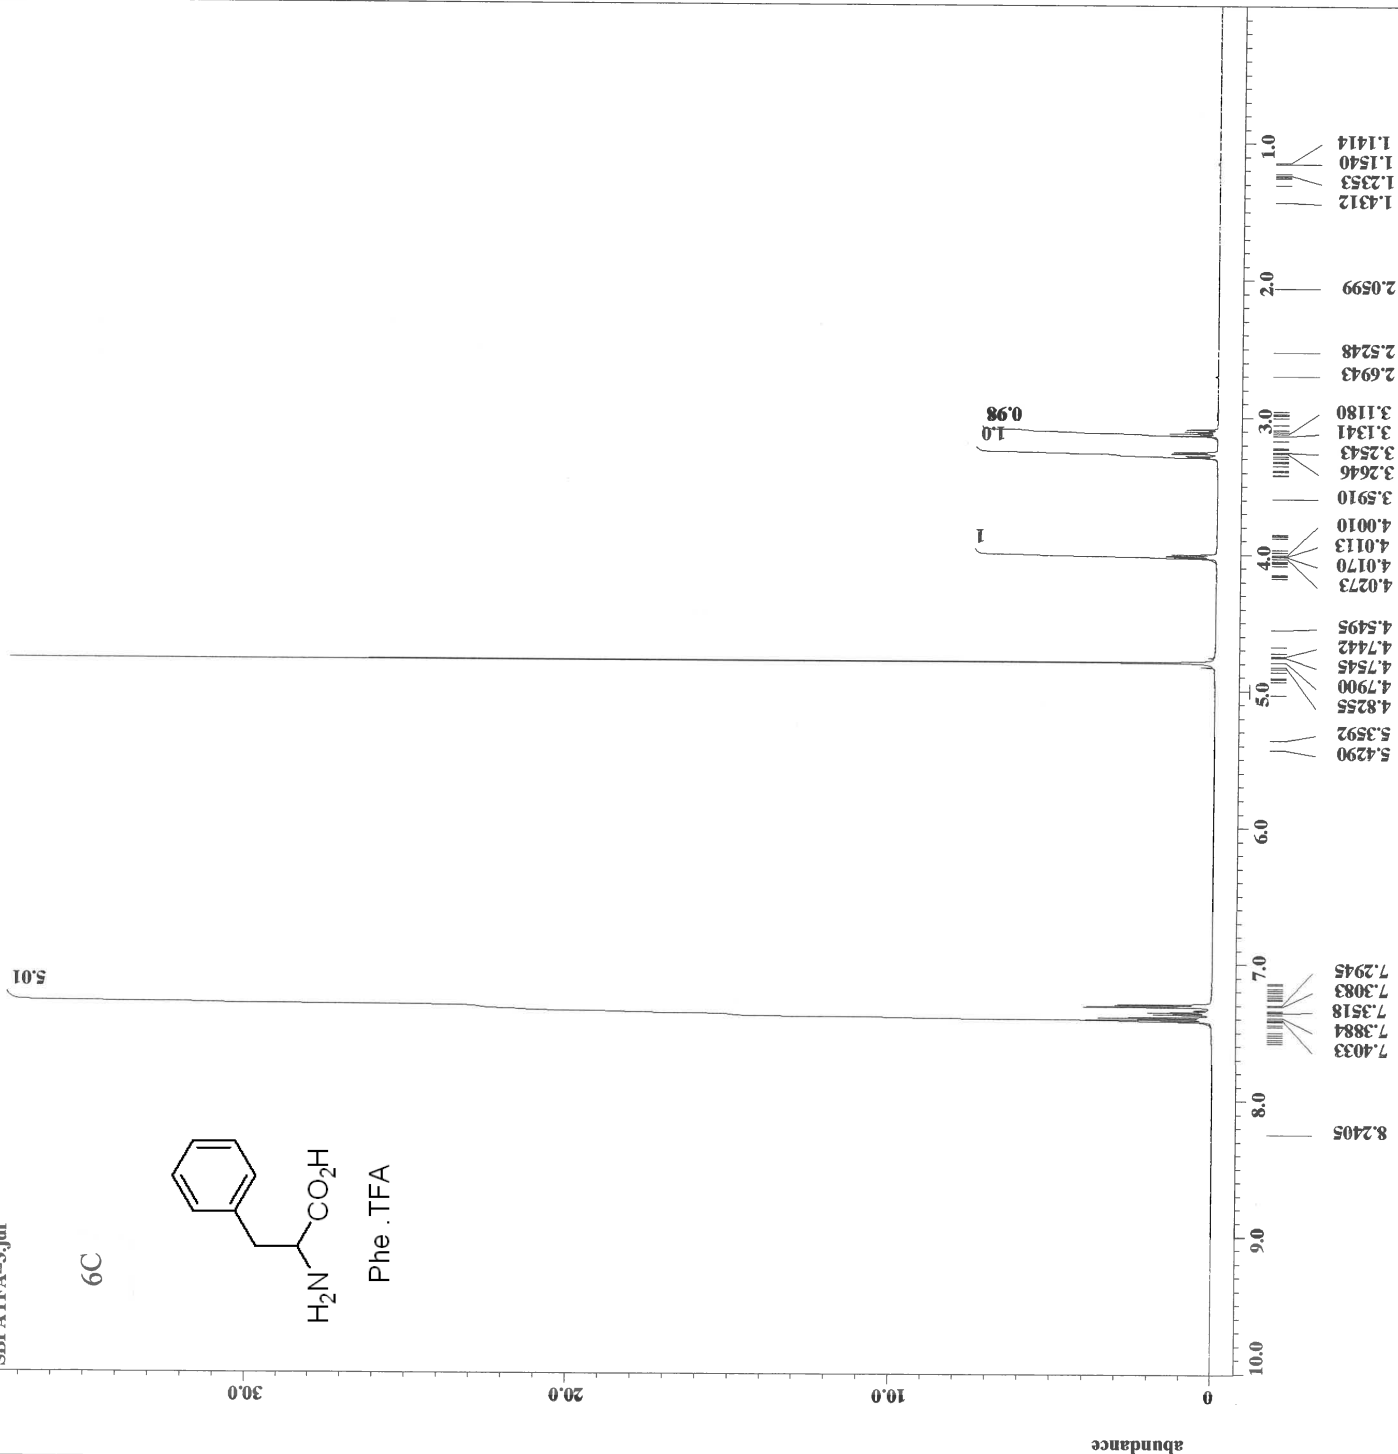

X : parts per Million : 1H

6C

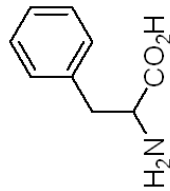

Phe.TFA

Filename = SBPATFAC-2.jdf  
Author = delta  
Experiment = single\_pulse\_dec  
Sample\_id = S#401375  
Solvent = D2O  
Creation\_time = 20-SEP-2015 00:01:27  
Revision\_time = 19-SEP-2015 11:17:31  
Current\_time = 19-SEP-2015 11:17:59  
Comment = single pulse decouple  
Data\_format = 1D COMPLEX  
Dim\_size = 26214  
Dim\_title = 13C  
Dim\_units = [ppm]  
Dimensions = X  
Site = ECA 500  
Spectrometer = JNM-ECA500  
Field\_strength = 11.7473579[T] (500[MH  
X\_acq\_duration = 0.83361792[s]  
X\_domain = 13C  
X\_freq = 125.76529768[MHz]  
X\_offset = 100[ppm]  
X\_points = 32768  
X\_prescans = 4  
X\_resolution = 1.19959034[Hz]  
X\_sweep = 39.3081761[kHz]  
Irr\_domain = 1H  
Irr\_freq = 500.15991521[MHz]  
Irr\_offset = 5.0[ppm]  
Clipped = FALSE  
Mod\_return = 10  
Scans = 480  
Total\_scans = 480  
X\_90\_width = 10.73[us]  
X\_acq\_time = 0.83361792[s]  
X\_angle = 30[deg]  
X\_atn = 9[db]  
X\_pulse = 3.57666667[us]  
Irr\_atn\_dec = 20[db]  
Irr\_atn\_noe = 20[db]  
Irr\_noise = 20[db]  
Decoupling = WALTZ  
Initial\_wait = 1[s]  
Noe = TRUE  
Noe\_time = 0.2[s]  
Recvr\_gain = 50  
Relaxation\_delay = 0.2[s]  
Repetition\_time = 1.03361792[s]  
Temp\_get = 21.7[dc]

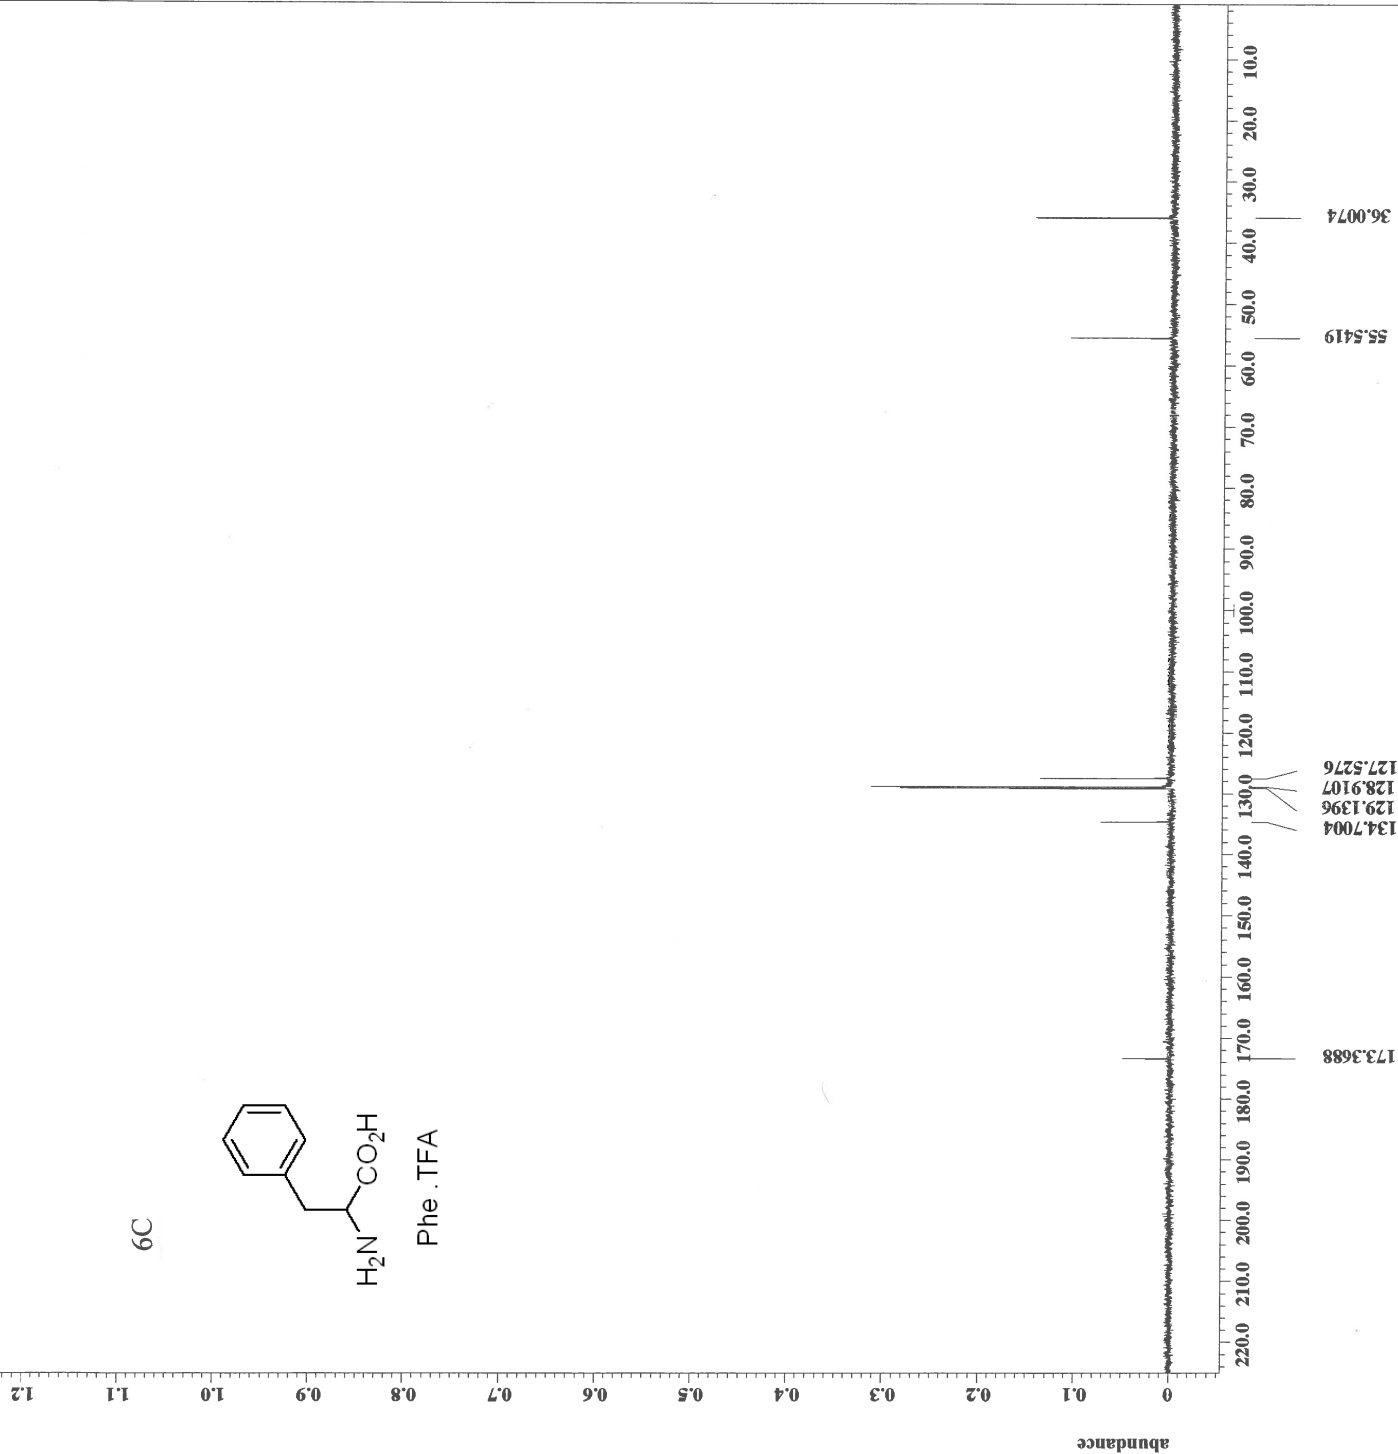

7C

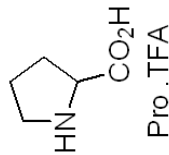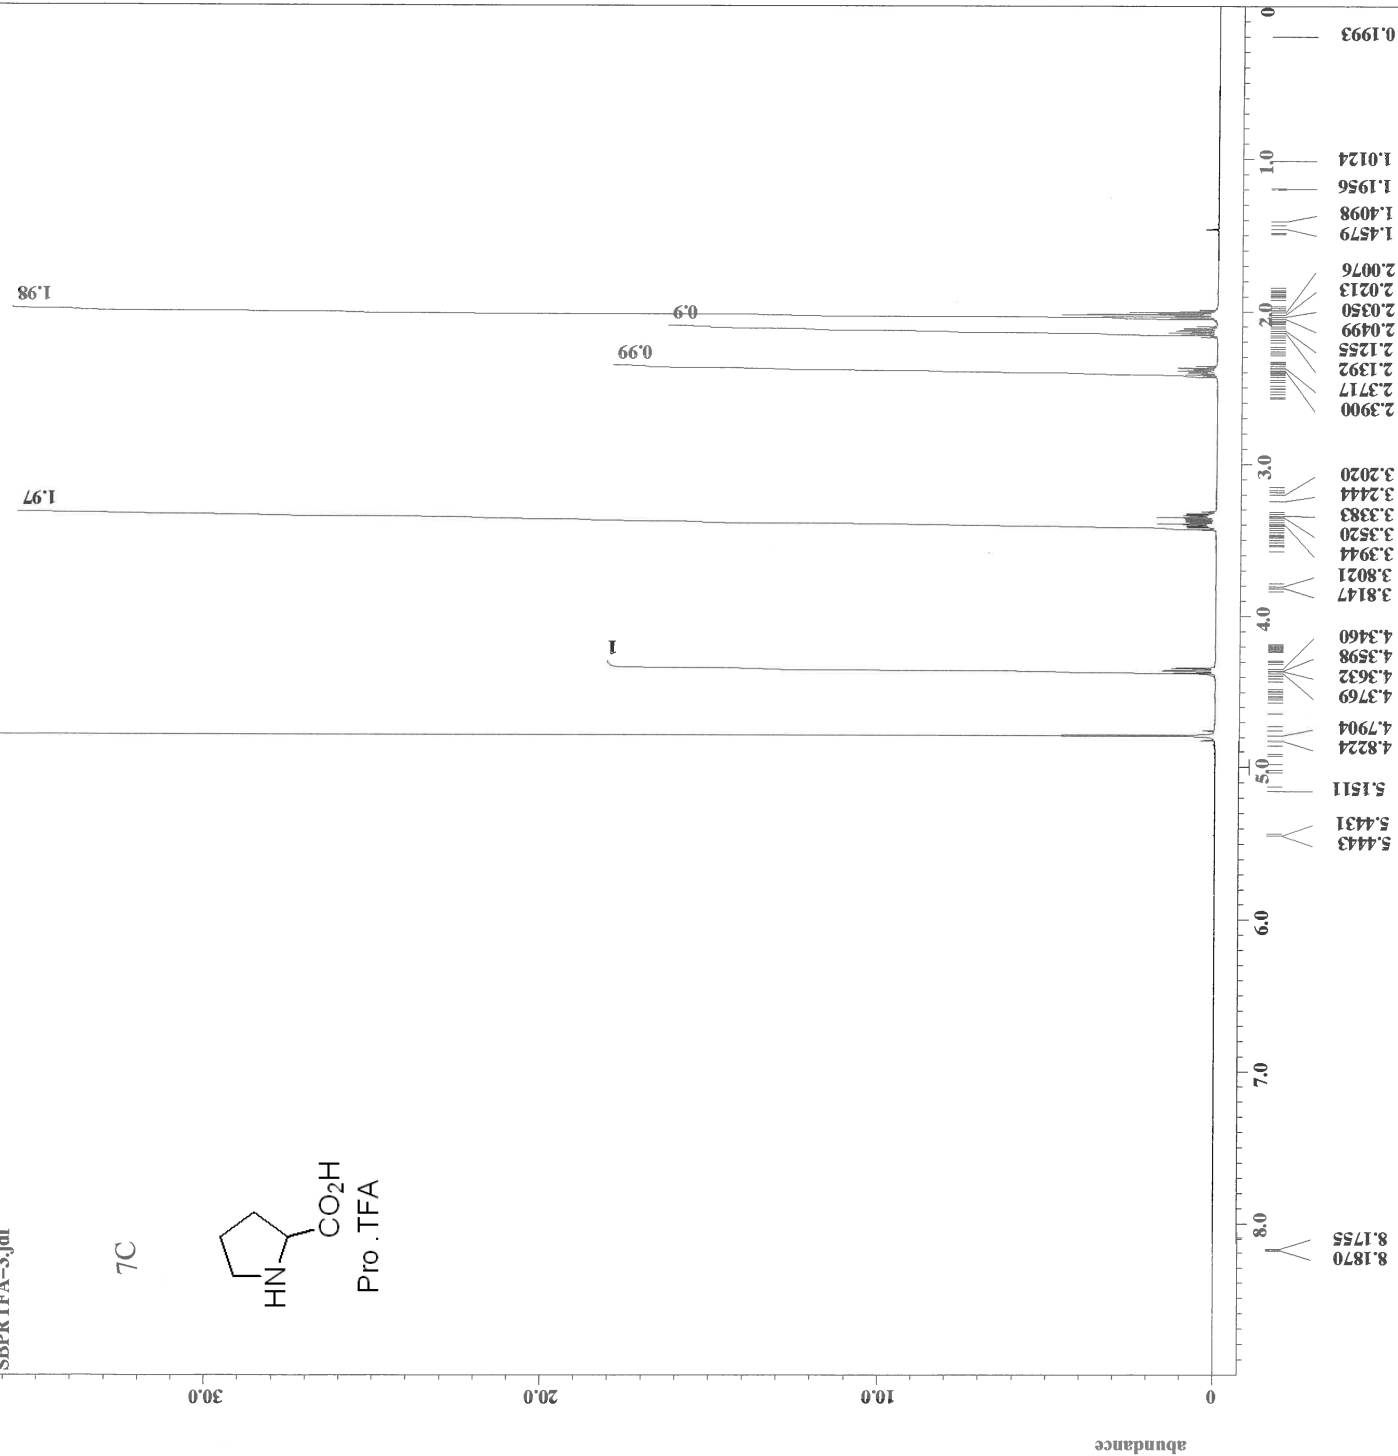

X : parts per Million : 1H

Filename = SBPR-TFA-3.jdf  
 Author = delta  
 Experiment = single\_pulse.ex2  
 Sample\_id = S#364521  
 Solvent = D2O  
 Creation\_time = 10-SEP-2015 22:55:29  
 Revision\_time = 10-SEP-2015 10:14:36  
 Current\_time = 10-SEP-2015 10:16:13  
 Comment = single\_pulse  
 Data\_format = 1D COMPLEX  
 Dim\_size = 13107  
 Dim\_title = 1H  
 Dim\_units = [ppm]  
 Dimensions = X  
 Site = ECA 500  
 Spectrometer = JNM-ECA500  
 Field\_strength = 11.7473579[T] (500[MH  
 X\_acq\_duration = 1.74587904[s]  
 X\_domain = 1H  
 X\_freq = 500.15991521[MHz]  
 X\_offset = 5.0[ppm]  
 X\_points = 16384  
 X\_prescans = 0  
 X\_resolution = 0.57277737[Hz]  
 X\_sweep = 9.38438438[kHz]  
 Irr\_domain = 1H  
 Irr\_freq = 500.15991521[MHz]  
 Irr\_offset = 5.0[ppm]  
 Tri\_domain = 1H  
 Tri\_freq = 500.15991521[MHz]  
 Tri\_offset = 5.0[ppm]  
 Clipped = FALSE  
 Mod\_return = 1  
 Scans = 16  
 Total\_scans = 16  
 X\_90\_width = 12.54[us]  
 X\_acq\_time = 1.74587904[s]  
 X\_angle = 45[deg]  
 X\_atn = 4[dB]  
 X\_pulse = 6.27[us]  
 Irr\_mode = Off  
 Tri\_mode = Off  
 Dante\_presat = FALSE  
 Initial\_wait = 1[s]  
 Recvr\_gain = 36  
 Relaxation\_delay = 10[s]  
 Repetition\_time = 11.74587904[s]  
 Temp\_get = 21.1[dc]

7C

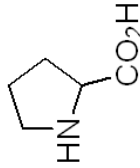

Pro. TFA

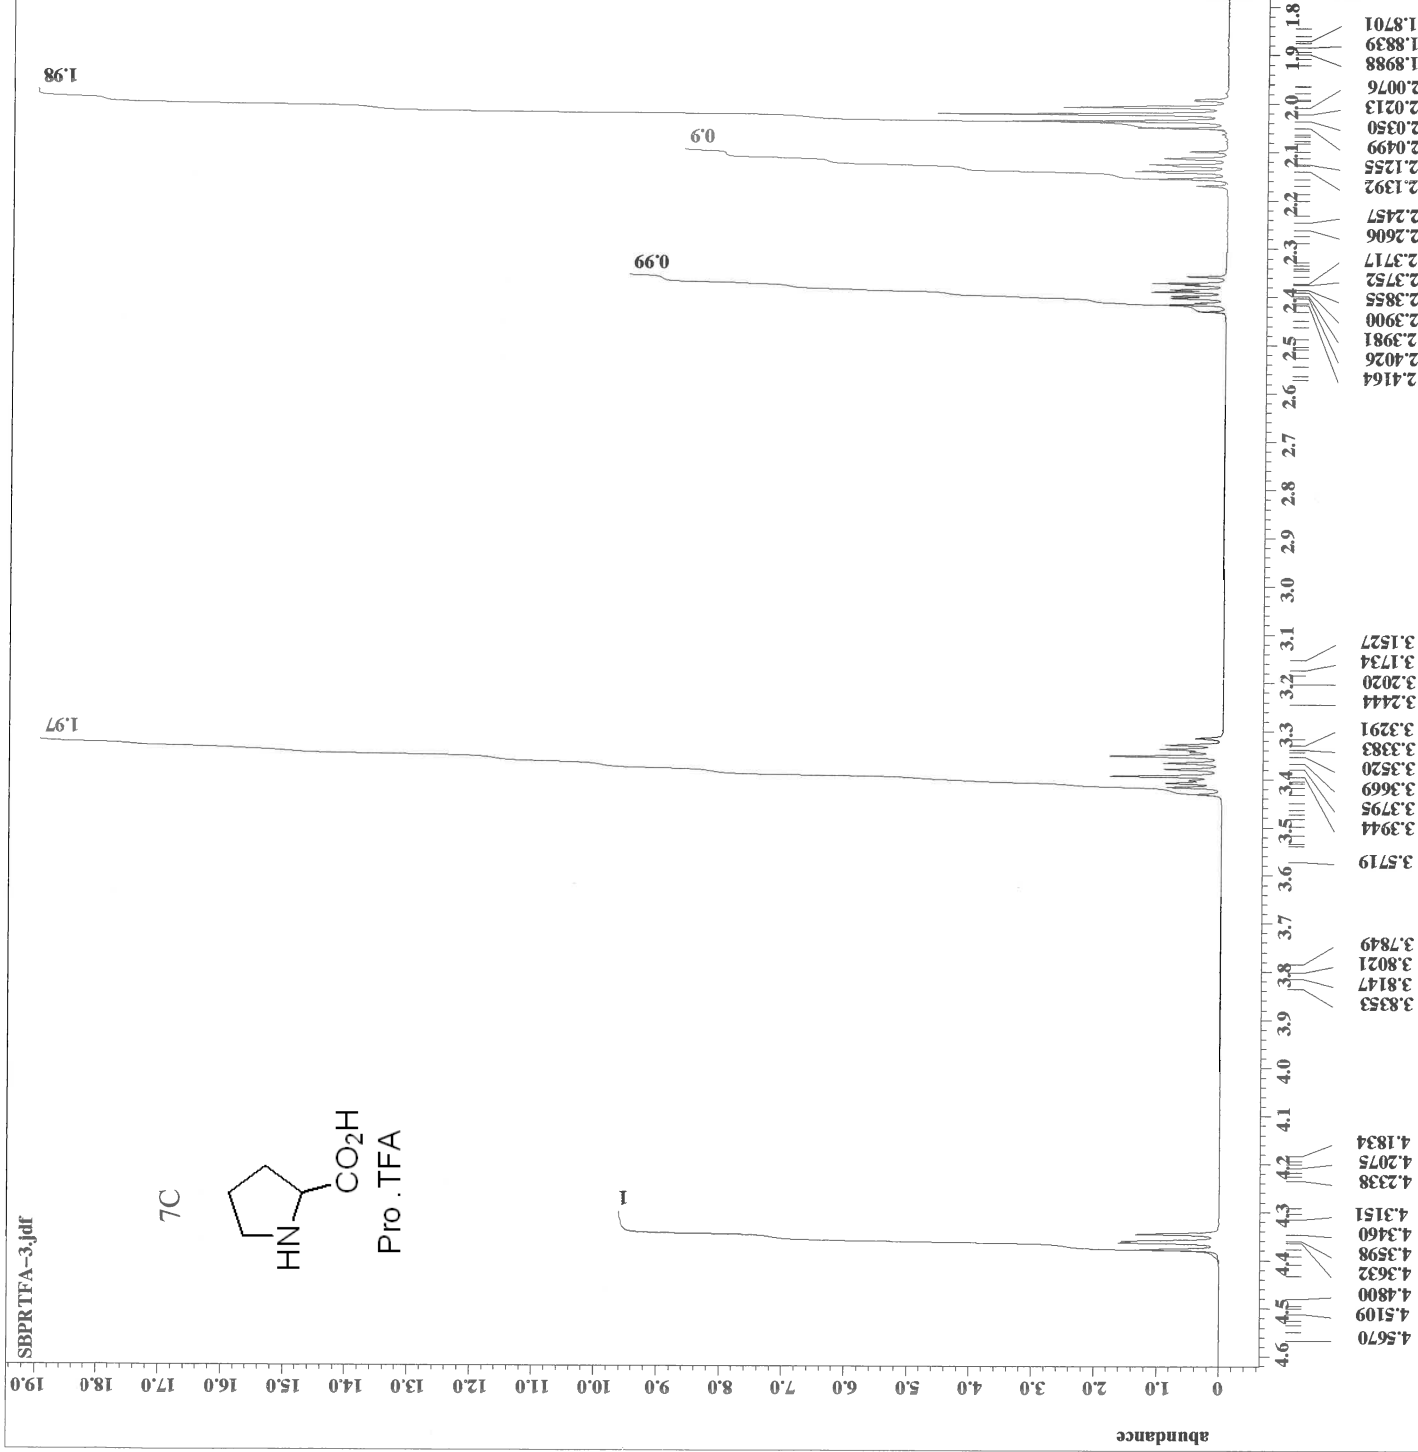

X : parts per Million : 1H

Filename = SBPRTEFA-3.jdf  
Author = Delta  
Experiment = single\_pulse.ex2  
Sample\_id = S#364521  
Solvent = D2O  
Creation\_time = 10-SEP-2015 22:55:29  
Revision\_time = 10-SEP-2015 10:14:36  
Current\_time = 10-SEP-2015 10:16:47  
Comment = single\_pulse  
Data\_format = 1D COMPLEX  
Dim\_size = 13107  
Dim\_title = 1H  
Dim\_units = [ppm]  
Dimensions = X  
Site = ECA 500  
Spectrometer = JNM-ECA500  
Field\_strength = 11.7473579[T] (500[MH  
X\_acq\_duration = 1.74587904[s]  
X\_domain = 1H  
X\_freq = 500.15991521[MHz]  
X\_offset = 5.0[ppm]  
X\_points = 16384  
X\_prescans = 0  
X\_resolution = 0.5727737[Hz]  
X\_sweep = 9.38438438[kHz]  
Irr\_domain = 1H  
Irr\_freq = 500.15991521[MHz]  
Irr\_offset = 5.0[ppm]  
Tri\_domain = 1H  
Tri\_freq = 500.15991521[MHz]  
Tri\_offset = 5.0[ppm]  
Clipped = FALSE  
Mod\_return = 1  
Scans = 16  
Total\_scans = 16  
X\_90\_width = 12.54[us]  
X\_acq\_time = 1.74587904[s]  
X\_angle = 45[deg]  
X\_atn = 4[dB]  
X\_pulse = 6.27[us]  
Irr\_mode = Off  
Tri\_mode = Off  
Dante\_presat = FALSE  
Initial\_wait = 1[s]  
Recvr\_gain = 36  
Relaxation\_delay = 10[s]  
Repetition\_time = 11.74587904[s]  
Temp\_get = 21.1[degC]

7C

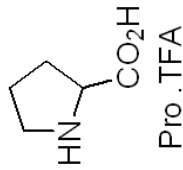

```

Filename      = SBPRTFAC-2.jdf
Author        = delta
Experiment    = single_pulse_dec
Sample_id     = S#368427
Solvent       = D2O
Creation_time = 10-SEP-2015 23:06:02
Revision_time = 10-SEP-2015 10:22:49
Current_time  = 10-SEP-2015 10:23:29

Comment       = single pulse decouple
Data_format   = 1D COMPLEX
Dim_size      = 26214
Dim_title     = 13C
Dim_units     = [ppm]
Dimensions    = X
Site          = ECA 500
Spectrometer  = JNM-ECA500

Field_strength = 11.7473579[T] (500[MH
X_acq_duration = 0.83361792[s]
X_domain       = 13C
X_freq         = 125.76529768[MHz]
X_offset       = 100[ppm]
X_points       = 32768
X_prescans     = 4
X_resolution   = 1.19959034[Hz]
X_sweep        = 39.3081761[kHz]
X_domain       = 1H
Irr_freq       = 500.15991521[MHz]
Irr_offset     = 5.0[ppm]
Clipped        = FALSE
Mod_return     = 10
Scans          = 470
Total_scans    = 470

X_90_width     = 10.73[us]
X_acq_time     = 0.83361792[s]
X_angle        = 30[deg]
X_atn          = 9[db]
X_pulse        = 3.57666667[us]
Irr_atn_dec    = 20[db]
Irr_atn_noe    = 20[db]
Irr_noise      = WALTZ
Decoupling     = TRUE
Initial_wait   = 1[s]
Noe            = TRUE
Noe_time        = 0.2[s]
Recvr_gain     = 50
Relaxation_delay = 0.2[s]
Repetition_time = 1.03361792[s]
Temp_get       = 21.5[dC]

```

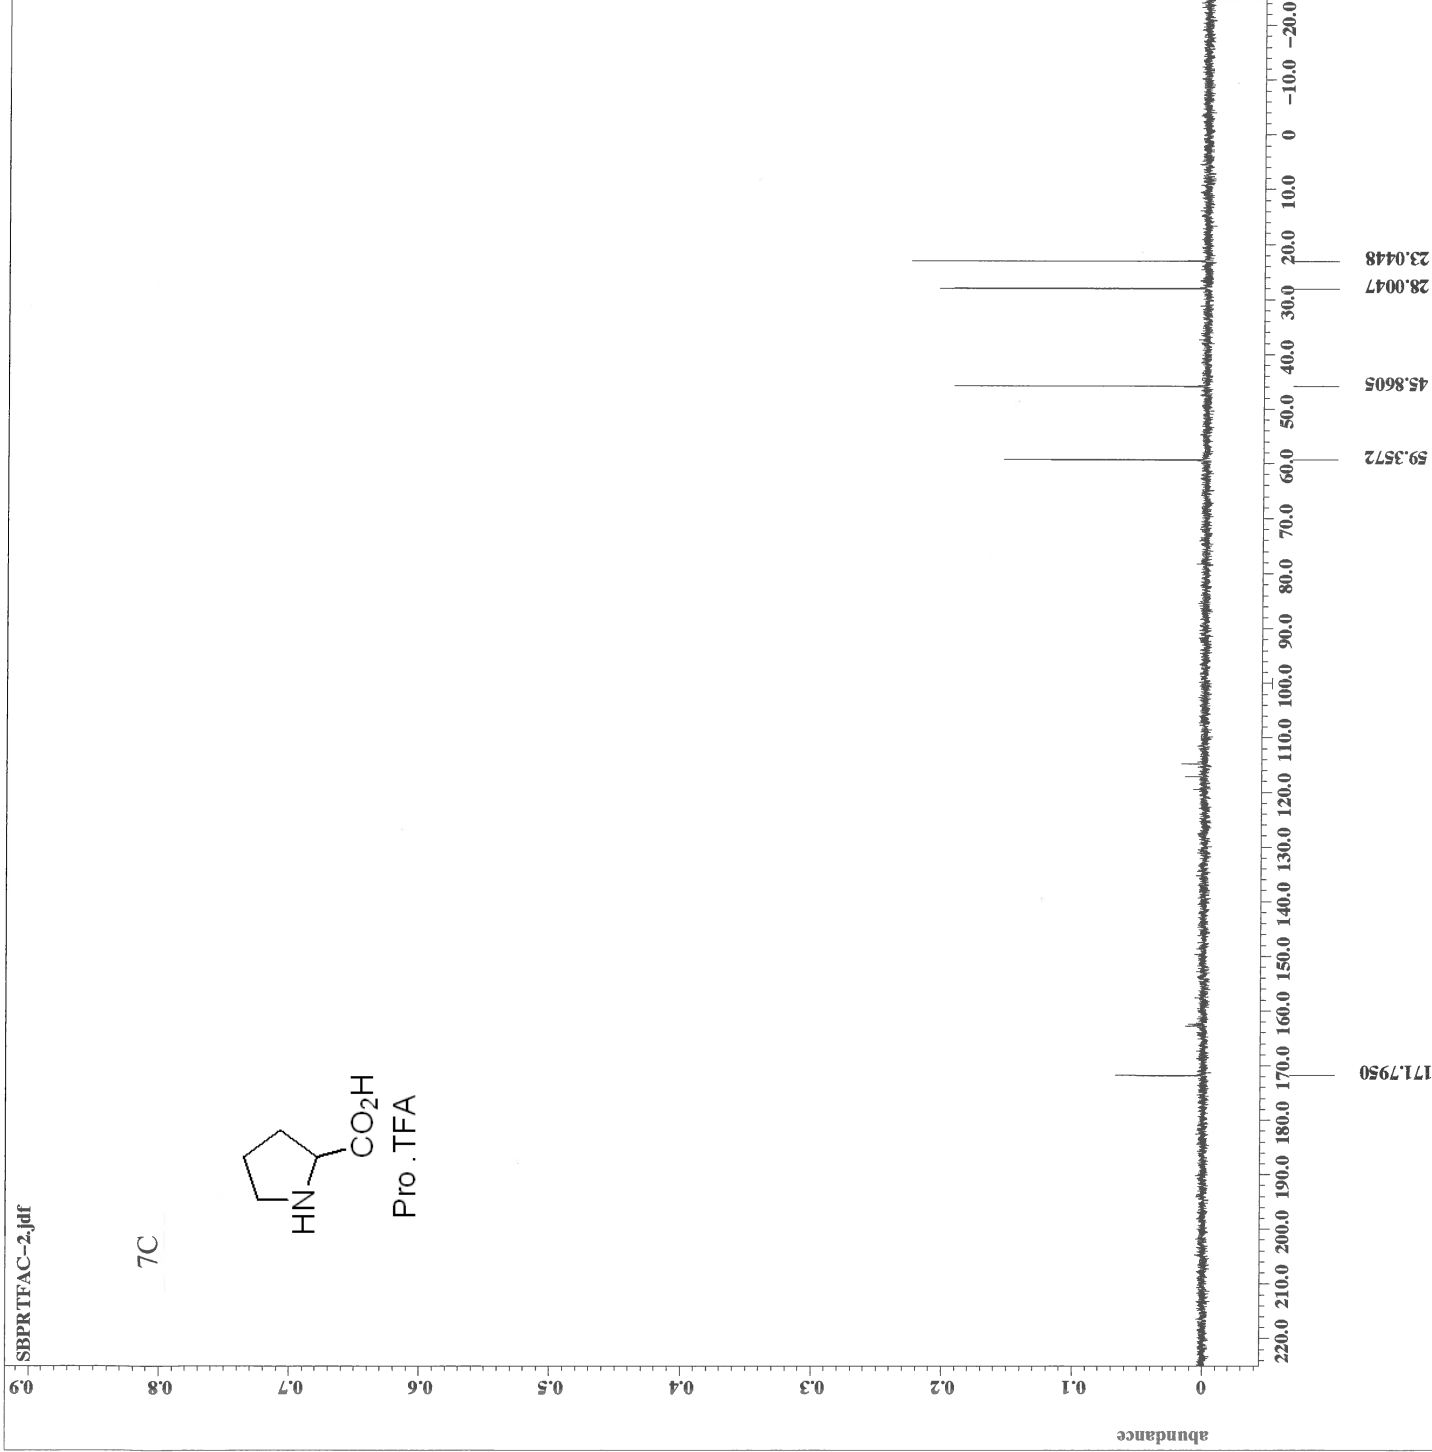

8C

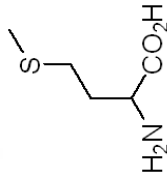

Met.TFA

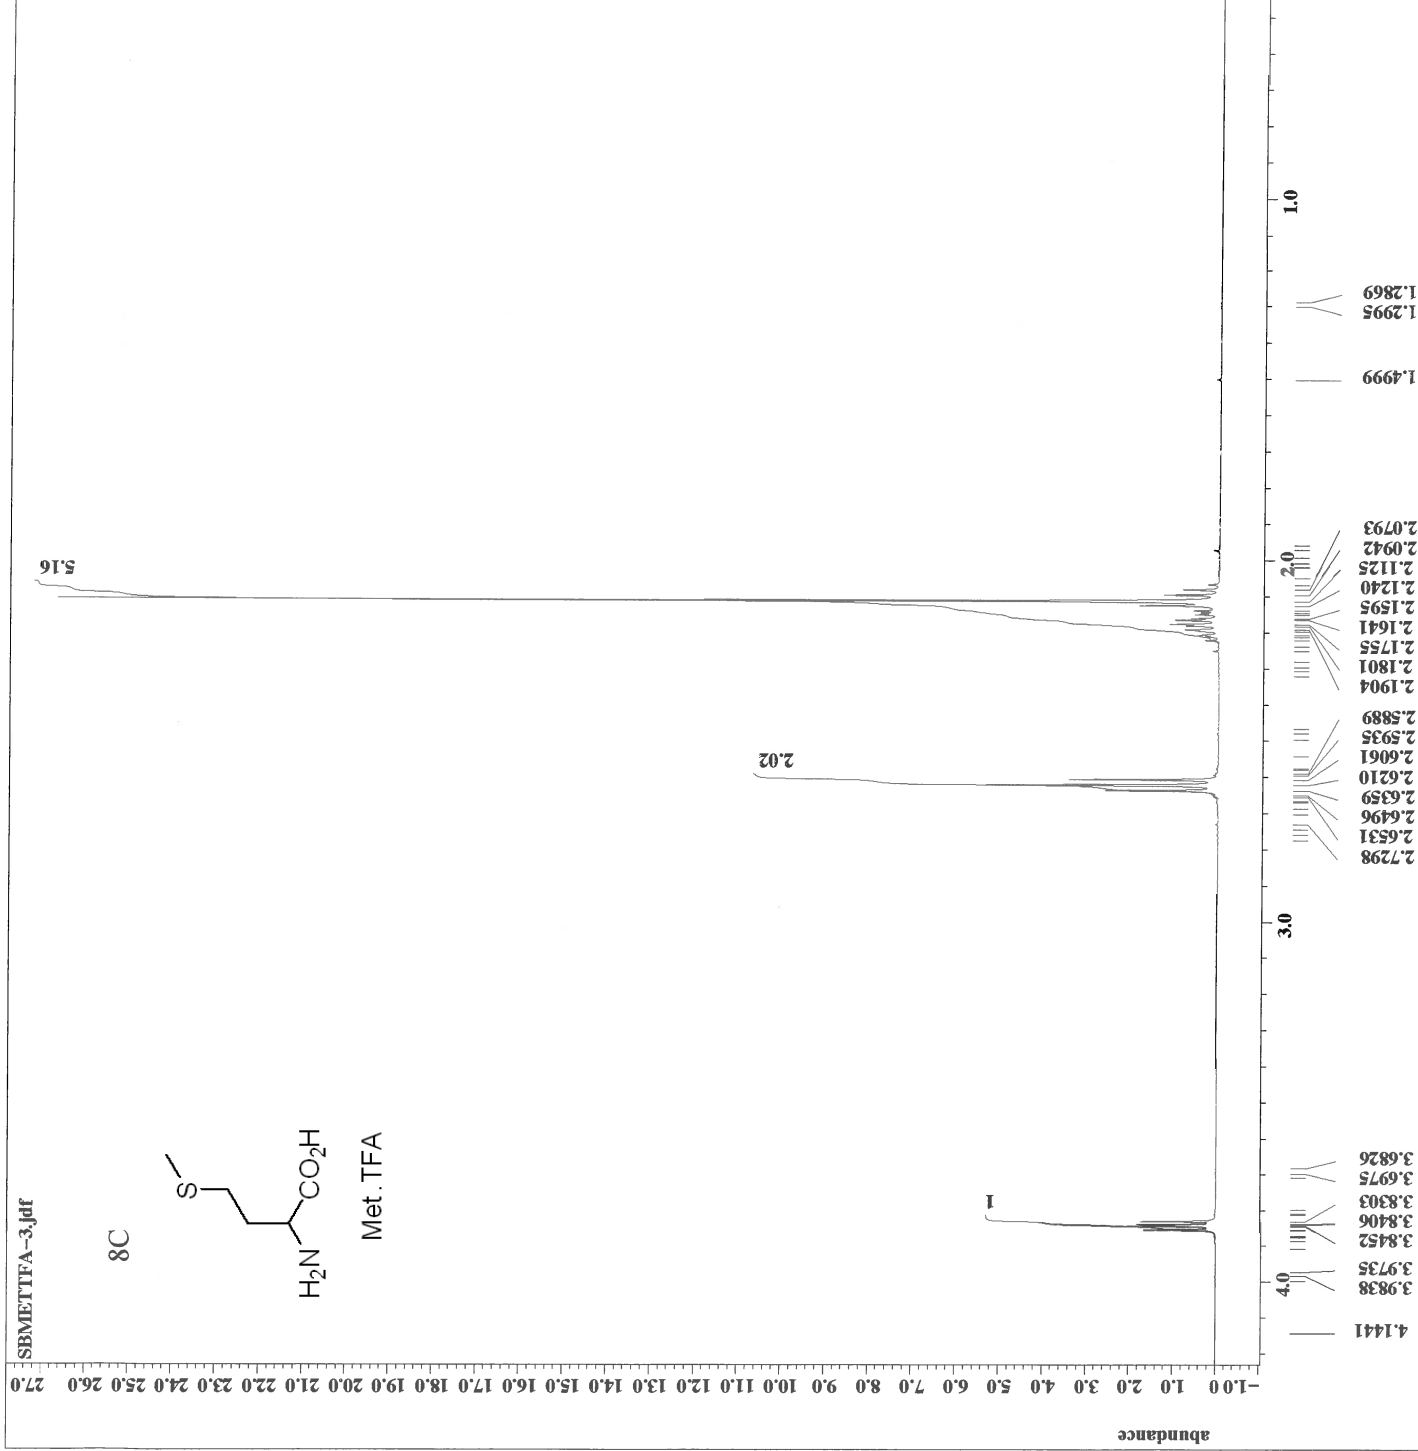

X : parts per Million : 1H

Filename = SBMETTFA-3.jdf  
 Author = delta  
 Experiment = single\_pulse.ex2  
 Sample\_id = S#66579  
 Solvent = D2O  
 Creation\_time = 16-SEP-2015 07:18:08  
 Revision\_time = 15-SEP-2015 18:36:19  
 Current\_time = 15-SEP-2015 18:37:13  
 Comment = single\_pulse  
 Data\_format = 1D COMPLEX  
 Dim\_size = 13107  
 Dim\_title = 1H  
 Dim\_units = [ppm]  
 Dimensions = X  
 Site = ECA 500  
 Spectrometer = JNM-ECA500  
 Field\_strength = 11.7473579[T] (500[MH  
 X\_acq\_duration = 1.74587904[s]  
 X\_domain = 1H  
 X\_freq = 500.15991521[MHz]  
 X\_offset = 5.0[ppm]  
 X\_points = 16384  
 X\_prescans = 0  
 X\_resolution = 0.57277737[Hz]  
 X\_sweep = 9.38438438[kHz]  
 Irr\_domain = 1H  
 Irr\_freq = 500.15991521[MHz]  
 Irr\_offset = 5.0[ppm]  
 Tri\_domain = 1H  
 Tri\_freq = 500.15991521[MHz]  
 Tri\_offset = 5.0[ppm]  
 Clipped = FALSE  
 Mod\_return = 1  
 Scans = 11  
 Total\_scans = 11  
 X\_90\_width = 12.54[us]  
 X\_acq\_time = 1.74587904[s]  
 X\_angle = 45[deg]  
 X\_atn = 4[dB]  
 X\_pulse = 6.27[us]  
 Irr\_mode = Off  
 Irr\_mode = Off  
 Dante\_presat = FALSE  
 Initial\_wait = 1[s]  
 Recvr\_gain = 38  
 Relaxation\_delay = 10[s]  
 Repetition\_time = 11.74587904[s]  
 Temp\_get = 21.2[DC]



8C

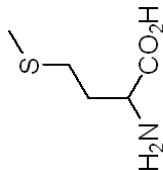

Met.TFA

Filename = SBMETTFAC-2.jdf  
Author = delta  
Experiment = single\_pulse\_dec  
Sample\_id = s#669006  
Solvent = D2O  
Creation\_time = 16-SEP-2015 07:26:52  
Revision\_time = 15-SEP-2015 18:43:06  
Current\_time = 15-SEP-2015 18:43:22  
Comment = single pulse decouple  
Data\_format = 1D COMPLEX  
Dim\_size = 26214  
Dim\_title = 13C  
Dim\_units = [ppm]  
Dimensions = X  
Site = ECA 500  
Spectrometer = JNM-ECA500  
Field\_strength = 11.7473579[T] (500[MH  
X\_acq\_duration = 0.83361792[s]  
X\_domain = 13C  
X\_freq = 125.76529768[MHz]  
X\_offset = 100[ppm]  
X\_points = 32768  
X\_prescans = 4  
X\_resolution = 1.19959034[Hz]  
X\_sweep = 39.3081761[kHz]  
Irr\_domain = 1H  
Irr\_freq = 500.15991521[MHz]  
Irr\_offset = 5.0[ppm]  
Clipped = FALSE  
Mod\_return = 10  
Scans = 500  
Total\_scans = 500  
X\_90\_width = 10.73[us]  
X\_acq\_time = 0.83361792[s]  
X\_angle = 30[deg]  
X\_atn = 9[db]  
X\_pulse = 3.57666667[us]  
Irr\_atn\_dec = 20[db]  
Irr\_atn\_noe = 20[db]  
Irr\_noise = WALYZ  
Decoupling = TRUE  
Initial\_wait = 1[s]  
Noe = TRUE  
Noe\_time = 0.1[s]  
Recvr\_gain = 50  
Relaxation\_delay = 0.1[s]  
Repetition\_time = 0.93361792[s]  
Temp\_get = 21.6[dc]

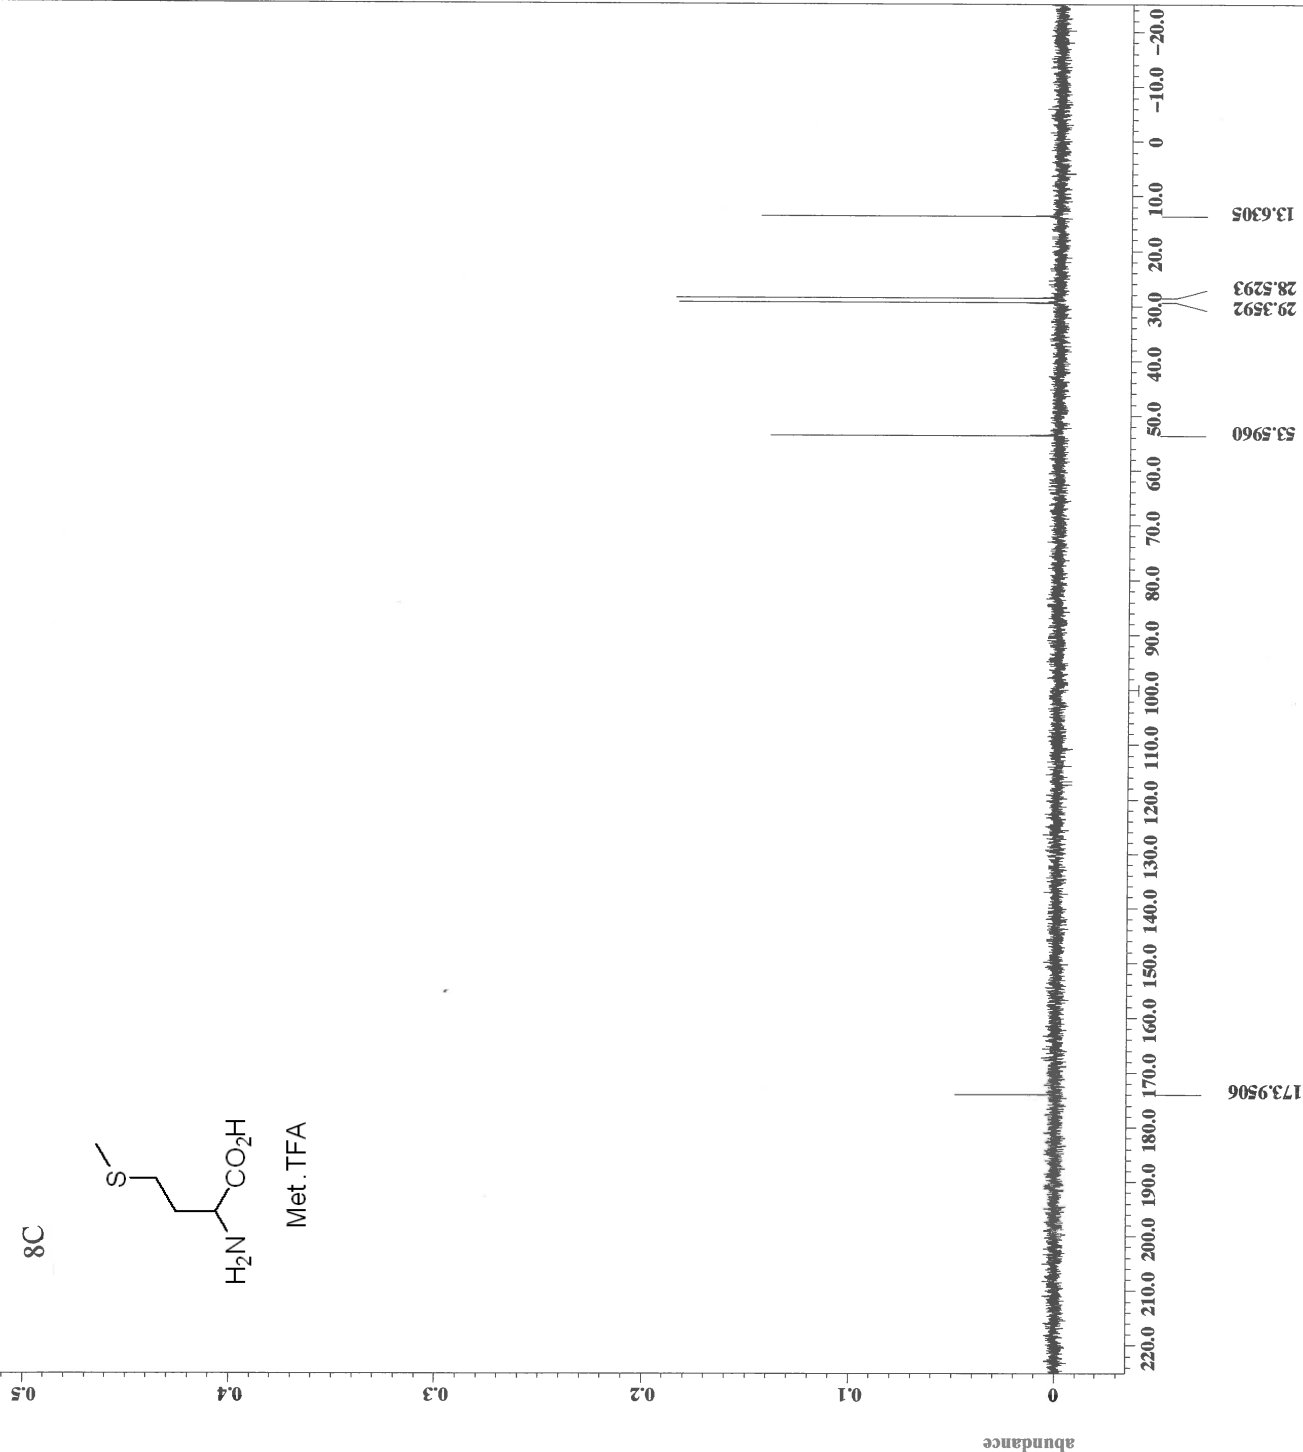

X : parts per Million : 13C

|                  |   |                       |
|------------------|---|-----------------------|
| Filename         | = | SPHRTFA-3.jjdf        |
| Author           | = | delta                 |
| Experiment       | = | single_pulse.ex2      |
| Sample id        | = | S#508822              |
| Solvent          | = | D2O                   |
| Creation time    | = | 10-SEP-2015 02:54:48  |
| Creation time    | = | 9-SEP-2015 14:12:32   |
| Current_time     | = | 9-SEP-2015 14:13:28   |
| Comment          | = | single_pulse          |
| Data_format      | = | 1D COMPLEX            |
| Dim_size         | = | 13107                 |
| Dim_title        | = | 1H                    |
| Dim_units        | = | [ppm]                 |
| Dimensions       | = | X                     |
| Site             | = | ECA 500               |
| Spectrometer     | = | JNM-ECA500            |
| Field_strength   | = | 11.7473579[T] (500[MH |
| X_acq_duration   | = | 1.74587904[s]         |
| X_domain         | = | 1H                    |
| X_freq           | = | 500.15991521[MHz]     |
| X_offset         | = | 5.0[ppm]              |
| X_points         | = | 16384                 |
| X_prescans       | = | 0                     |
| X_resolution     | = | 0.57277737[kHz]       |
| X_sweep          | = | 1H                    |
| irr_domain       | = | 9.38438438[kHz]       |
| irr_freq         | = | 500.15991521[MHz]     |
| irr_offset       | = | 5.0[ppm]              |
| Tri_domain       | = | 1H                    |
| Tri_freq         | = | 500.15991521[MHz]     |
| Tri_offset       | = | 5.0[ppm]              |
| Clipped          | = | FALSE                 |
| Mod_return       | = | 1                     |
| Scans            | = | 10                    |
| Total_scans      | = | 10                    |
| X_90_width       | = | 12.54[us]             |
| X_acq_time       | = | 1.74587904[s]         |
| X_angle          | = | 45[deg]               |
| X_atn            | = | 4[db]                 |
| X_pulse          | = | 6.27[us]              |
| irr_mode         | = | Off                   |
| Tri_mode         | = | Off                   |
| Dante_preset     | = | FALSE                 |
| Initial_wait     | = | 1[s]                  |
| Recvr_gain       | = | 32                    |
| Relaxation_delay | = | 10[s]                 |
| Repetition_time  | = | 1.74587904[s]         |
| Temp_get         | = | 21.5[degC]            |

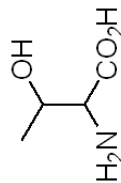

Thr.TFA

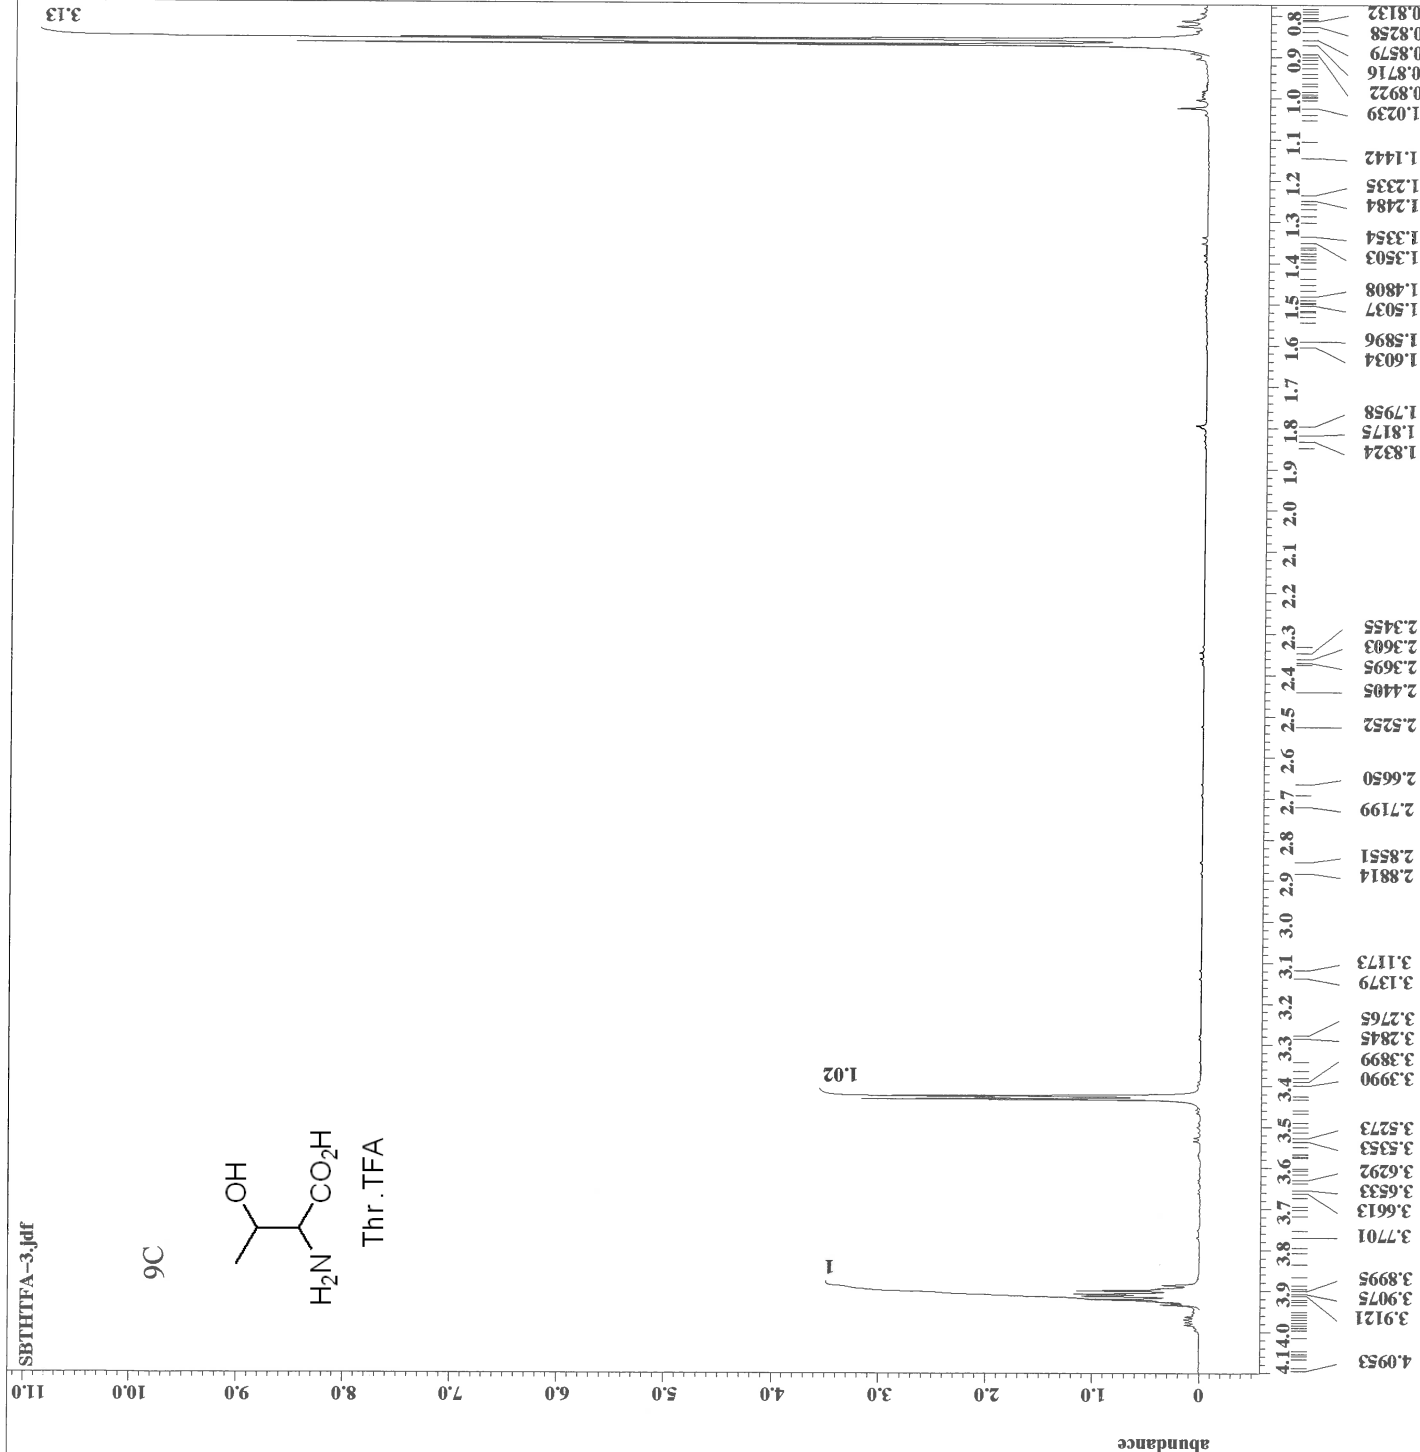

**X : parts per Million : 1H**

9C

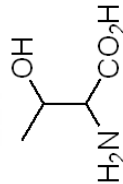

Thr.TFA

```

Filename      = SBTHTFAC-2.jdf
Author        = delta
Experiment    = single_pulse_dec
Sample_id     = S#518113
Solvent       = D2O
Creation_time  = 10-SEP-2015 03:14:26
Revision_time  = 9-SEP-2015 14:31:07
Current_time   = 9-SEP-2015 14:31:47

Comment       = single pulse decouple
Data_format   = 1D COMPLEX
Dim_size      = 26214
Dim_title     = 13C
Dim_units     = [ppm]
Dimensions    = X
Site          = ECA 500
Spectrometer  = JNM-ECA500

Field_strength = 11.7473579[T] (500[MH
X_acq_duration = 0.83361792[s]
X_domain       = 13C
X_freq         = 125.76529768[MHz]
X_offset       = 100[ppm]
X_points       = 32768
X_prescans     = 4
X_resolution   = 1.19959034[Hz]
X_sweep        = 39.3081761[kHz]
X_atn          = 1K
Irr_freq       = 500.15991521[MHz]
Irr_offset     = 5.0[ppm]
Clipped        = FALSE
Mod_return     = 10
Scans          = 410.0
Total_scans    = 410.0

X_90_width     = 10.73[us]
X_acq_time     = 0.83361792[s]
X_angle        = 30[deg]
X_atn          = 9[db]
X_pulse        = 3.57666667[us]
Irr_atn_dec    = 20[db]
Irr_atn_noe    = 20[db]
Irr_noise      = WALIZ
Decoupling     = TRUE
Initial_wait   = 1[s]
Noe            = TRUE
Noe_time       = 0.2[s]
Recvr_gain     = 50
Relaxation_delay = 0.2[s]
Repetition_time = 1.03361792[s]
Temp_get       = 21.9[degC]

```

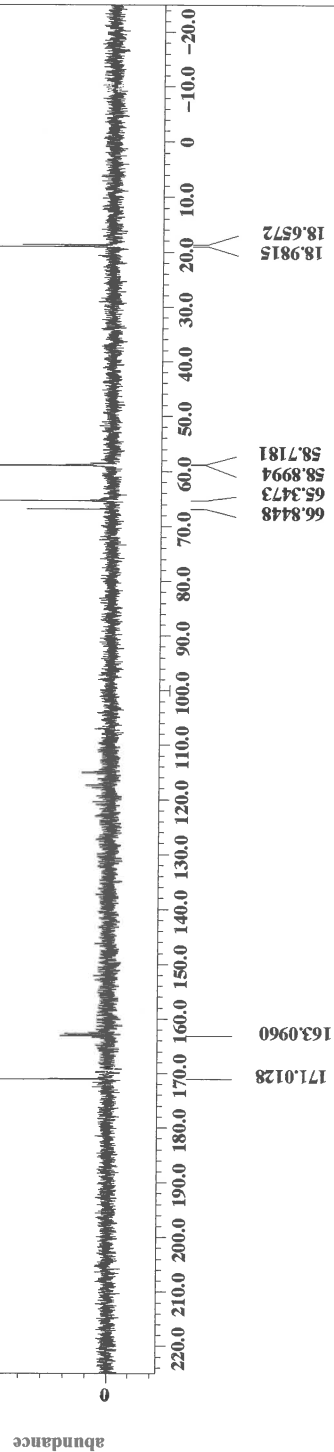

X : parts per Million : 13C

10C

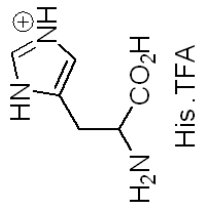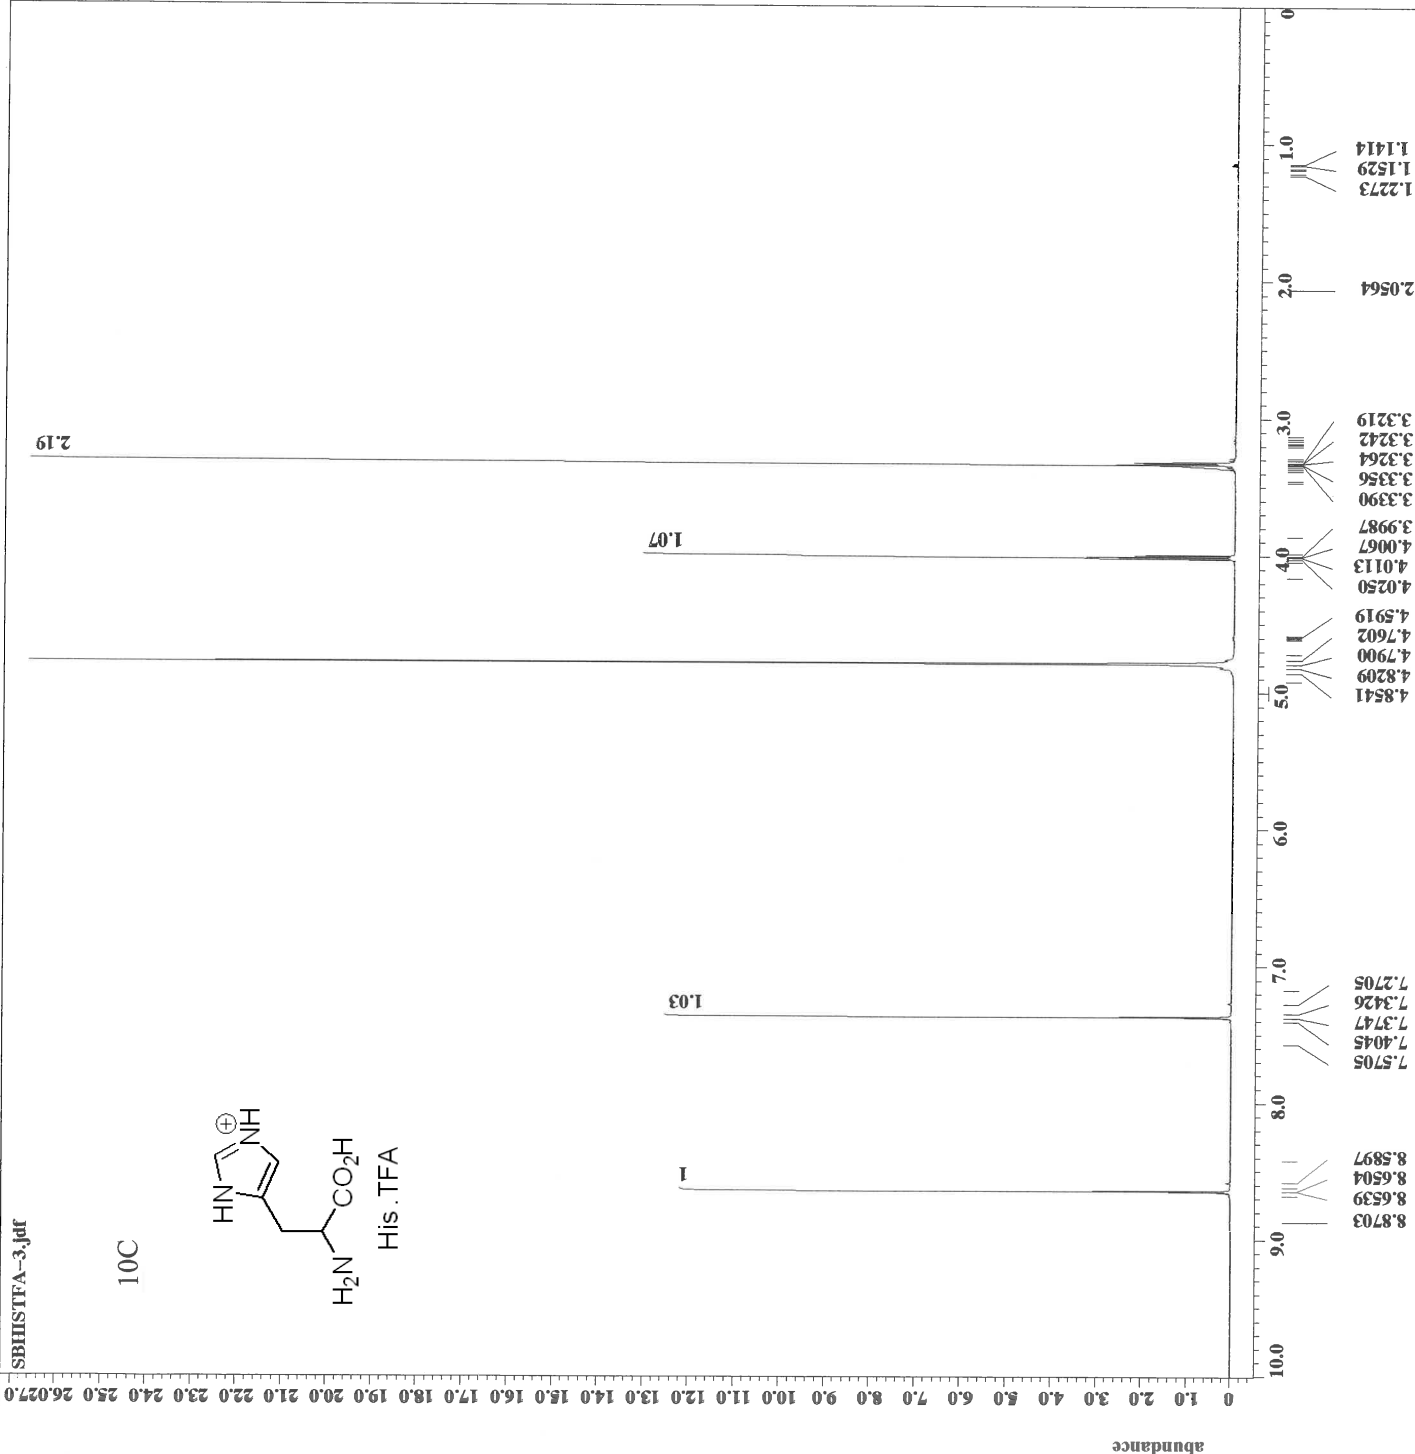

2.19

Filename = SBHSTFA-3.jdf  
 Author = delta  
 Experiment = single\_pulse.ex2  
 Sample\_id = S#653572  
 Solvent = D2O  
 Creation\_time = 16-SEP-2015 06:55:52  
 Revision\_time = 15-SEP-2015 18:14:40  
 Current\_time = 15-SEP-2015 18:15:28  
 Comment = single\_pulse  
 Data\_format = 1D COMPLEX  
 Dim\_size = 13107  
 Dim\_title = 1H  
 Dim\_units = [ppm]  
 Dimensions = X  
 Site = ECA 500  
 Spectrometer = JNM-ECA500  
 Field\_strength = 11.7473579[T] (500[MH  
 X\_acq\_duration = 1.74587904[s]  
 X\_domain = 1H  
 X\_freq = 500.15991521[MHz]  
 X\_offset = 5.0[ppm]  
 X\_points = 16384  
 X\_prescans = 0  
 X\_resolution = 0.57277737[Hz]  
 X\_sweep = 9.38438438[kHz]  
 Irr\_domain = 1H  
 Irr\_freq = 500.15991521[MHz]  
 Irr\_offset = 5.0[ppm]  
 Tri\_domain = 1H  
 Tri\_freq = 500.15991521[MHz]  
 Tri\_offset = 5.0[ppm]  
 Clipped = FALSE  
 Mod\_return = 1  
 Scans = 10  
 Total\_scans = 10  
 X\_90\_width = 12.54[us]  
 X\_acq\_time = 1.74587904[s]  
 X\_angle = 45[deg]  
 X\_atn = 4[db]  
 X\_pulse = 6.27[us]  
 Irr\_mode = Off  
 Tri\_mode = Off  
 Dante\_presat = FALSE  
 Initial\_wait = 1[s]  
 Recvr\_gain = 48  
 Relaxation\_delay = 10[s]  
 Repetition\_time = 11.74587904[s]  
 Temp\_get = 21.1[dc]

10C

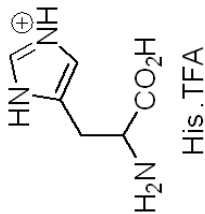

Filename = SBHISCTFA-3.jdf  
Author = delta  
Experiment = single\_pulse\_dec  
Sample\_id = S#655640  
Solvent = D2O  
Creation\_time = 16-SEP-2015 07:06:50  
Revision\_time = 15-SEP-2015 18:23:26  
Current\_time = 15-SEP-2015 18:23:42  
Comment = single pulse decouple  
Data\_format = 1D COMPLEX  
Dim\_size = 26214  
Dim\_title = 13C  
Dim\_units = [ppm]  
Dimensions = X  
Site = ECA 500  
Spectrometer = JNM-ECA500  
Field\_strength = 11.7473579[T] (500[MH  
X\_acq\_duration = 0.83361792[s]  
X\_domain = 13C  
X\_freq = 125.76529768[MHz]  
X\_offset = 100[ppm]  
X\_points = 32768  
X\_prescans = 4  
X\_resolution = 1.19959034[Hz]  
X\_sweep = 39.3081761[kHz]  
Irr\_domain = 1H  
Irr\_freq = 500.15991521[MHz]  
Irr\_offset = 5.0[ppm]  
Clipped = FALSE  
Mod\_return = 10  
Scans = 580  
Total\_scans = 580  
X\_90\_width = 10.73[us]  
X\_acq\_time = 0.83361792[s]  
X\_angle = 30[deg]  
X\_atn = 9[dB]  
X\_pulse = 3.57666667[us]  
Irr\_atn\_dec = 20[dB]  
Irr\_atn\_noe = 20[dB]  
Irr\_noise = WALIZ  
Decoupling = TRUE  
Initial\_wait = 1[s]  
Noe = TRUE  
Noe\_time = 0.2[s]  
Recvr\_gain = 50  
Relaxation\_delay = 0.2[s]  
Repetition\_time = 1.03361792[s]  
Temp\_get = 21.6[degC]

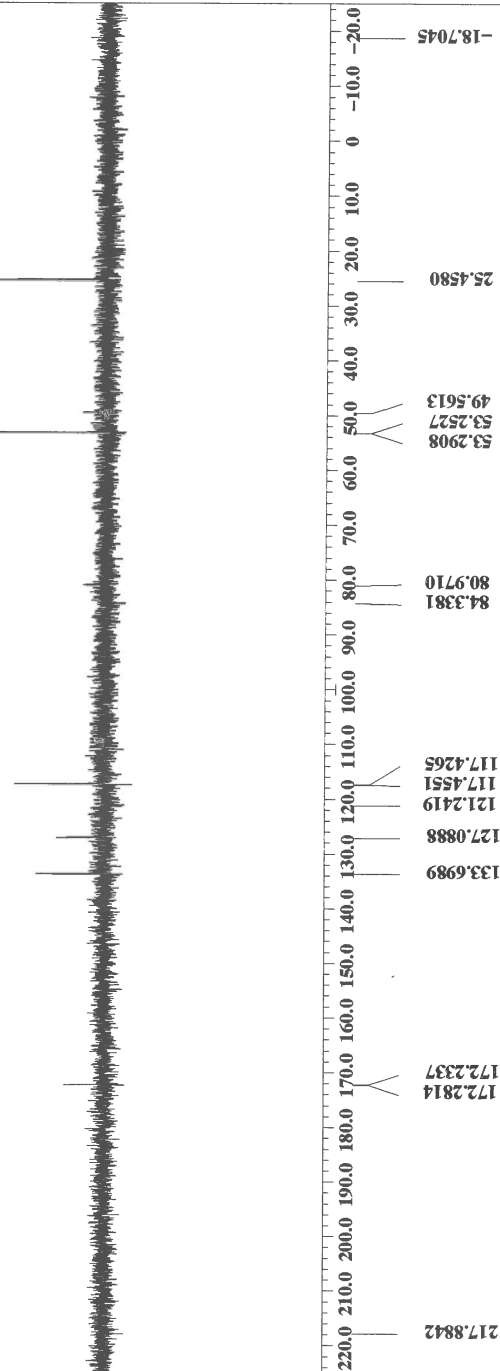

X : parts per Million : 13C

11C

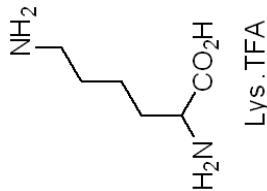

1

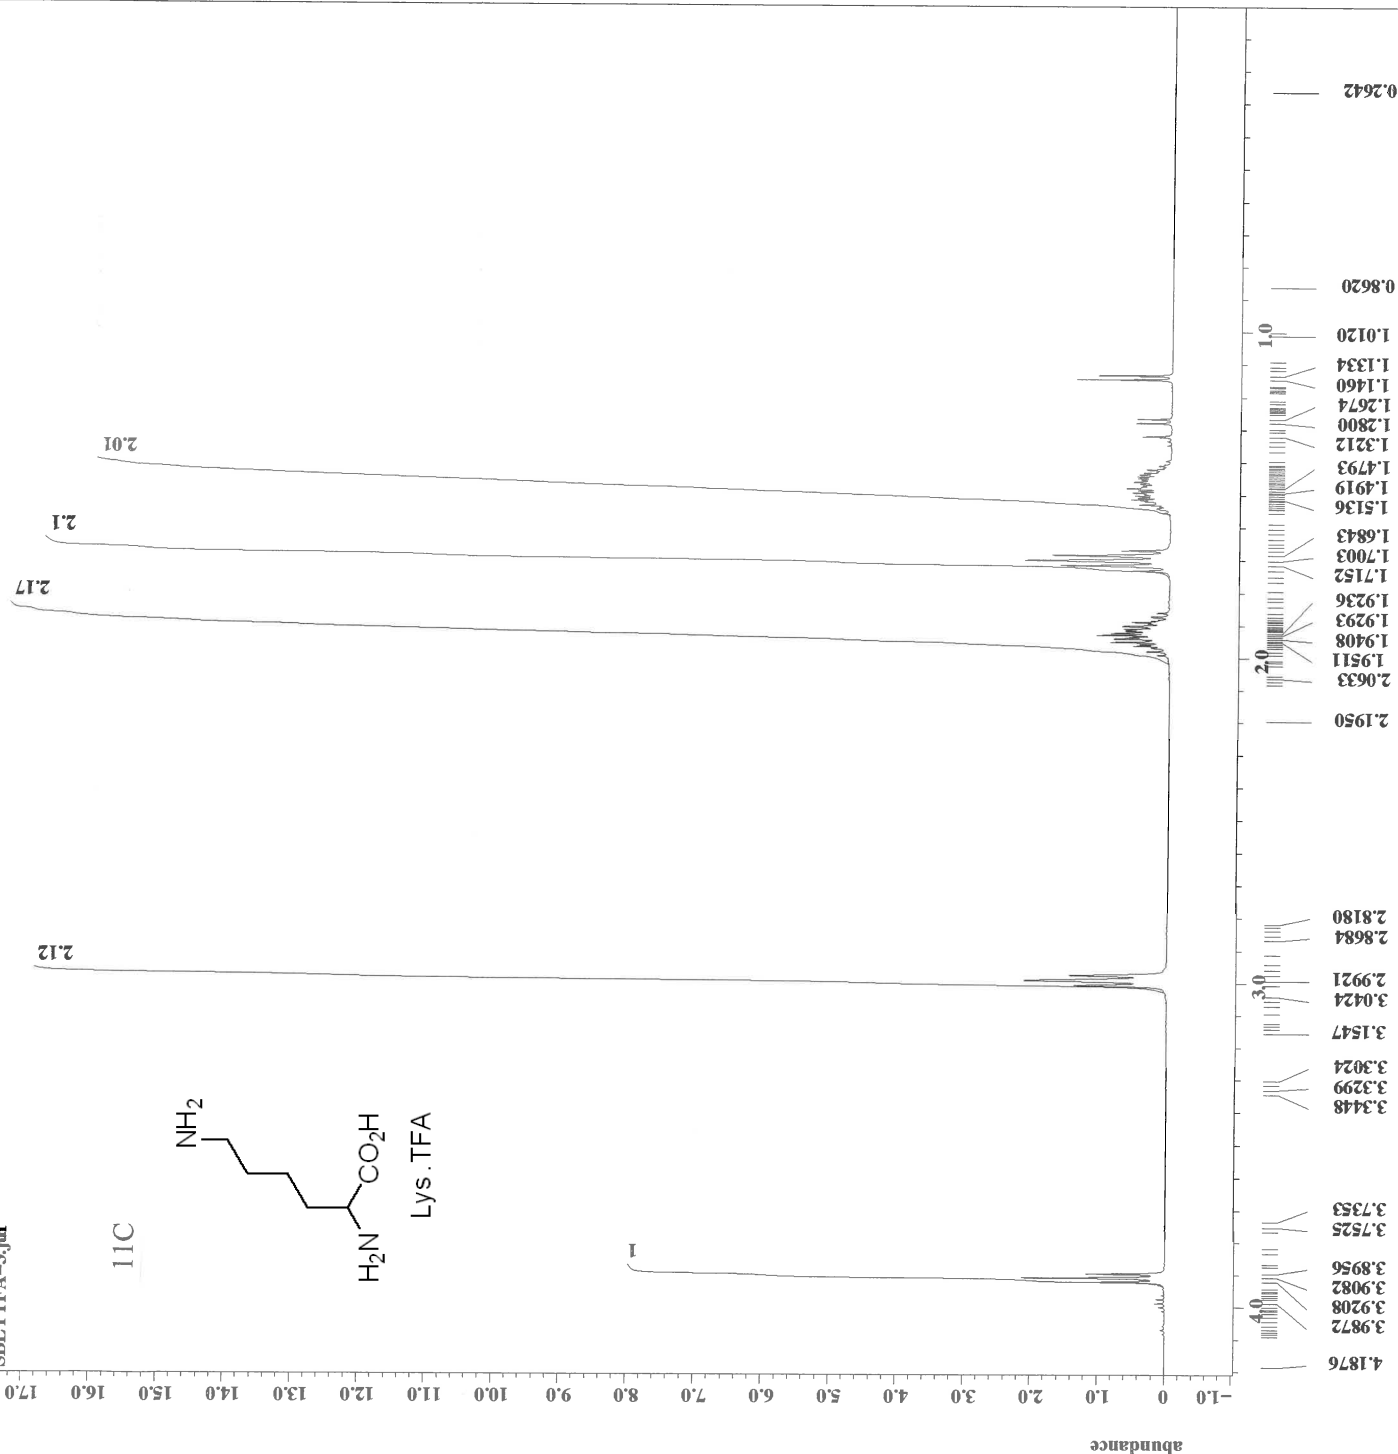

X : parts per Million : 1H

Filename = SBLYTFA-3.jdf  
 Author = delta  
 Experiment = single\_pulse.ex2  
 Sample\_id = S#499730  
 Solvent = CHLOROFORM-D  
 Creation\_time = 10-SEP-2015 02:40:37  
 Revision\_time = 9-SEP-2015 13:59:25  
 Current\_time = 9-SEP-2015 14:00:27  
 Comment = single\_pulse  
 Data\_format = 1D COMPLEX  
 Dim\_size = 13107  
 Dim\_title = 1H  
 Dim\_units = [ppm]  
 Dimensions = X  
 Site = ECA 500  
 Spectrometer = JNM-ECA500  
 Field\_strength = 11.7473579[T] (500[MH  
 X\_acq\_duration = 1.74587904[s]  
 X\_domain = 1H  
 X\_freq = 500.15991521[MHz]  
 X\_offset = 5.0[ppm]  
 X\_points = 16384  
 X\_prescans = 0  
 X\_resolution = 0.57277737[Hz]  
 X\_sweep = 9.38438438[kHz]  
 Irr\_domain = 1H  
 Irr\_freq = 500.15991521[MHz]  
 Irr\_offset = 5.0[ppm]  
 Tri\_domain = 1H  
 Tri\_freq = 500.15991521[MHz]  
 Tri\_offset = 5.0[ppm]  
 Clipped = FALSE  
 Mod\_return = 1  
 Scans = 11  
 Total\_scans = 11  
 X\_90\_width = 12.54[us]  
 X\_acq\_time = 1.74587904[s]  
 X\_angle = 45[deg]  
 X\_atn = 4[db]  
 X\_pulse = 6.27[us]  
 Irr\_mode = Off  
 Tri\_mode = Off  
 Dante\_presat = FALSE  
 Initial\_wait = 1[s]  
 Recvr\_gain = 34  
 Relaxation\_delay = 10[s]  
 Repetition\_time = 11.74587904[s]  
 Temp\_get = 21.6[dc]

11C

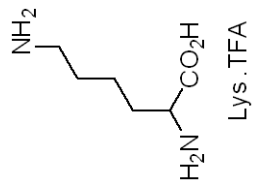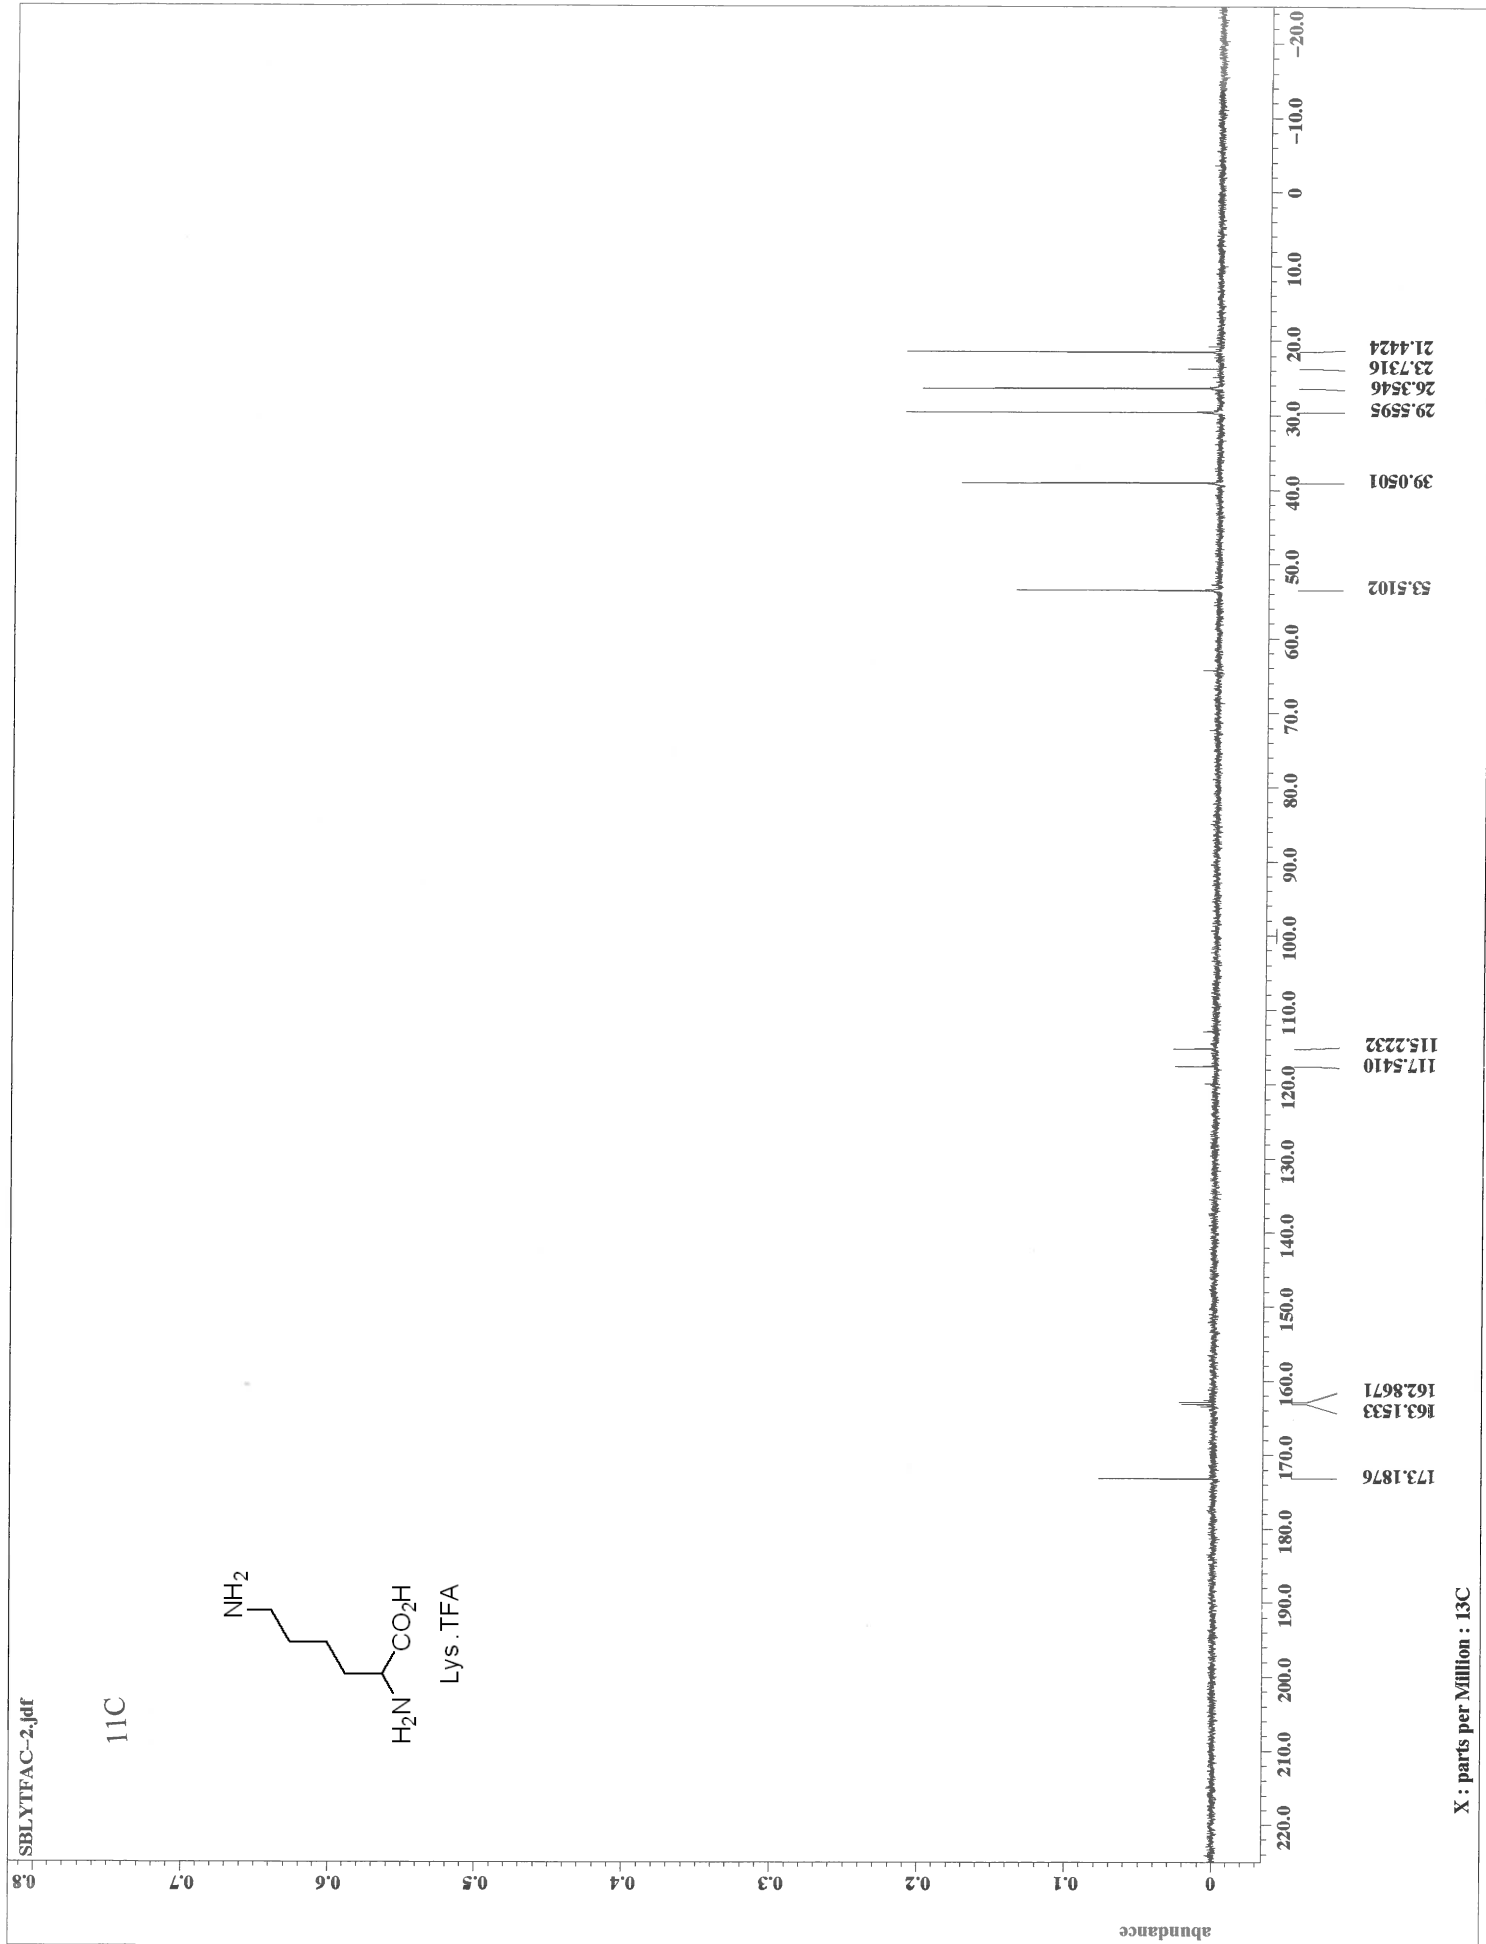

X : parts per Million : 13C

SBASPTFA-3.1df

12C

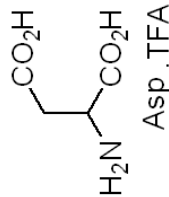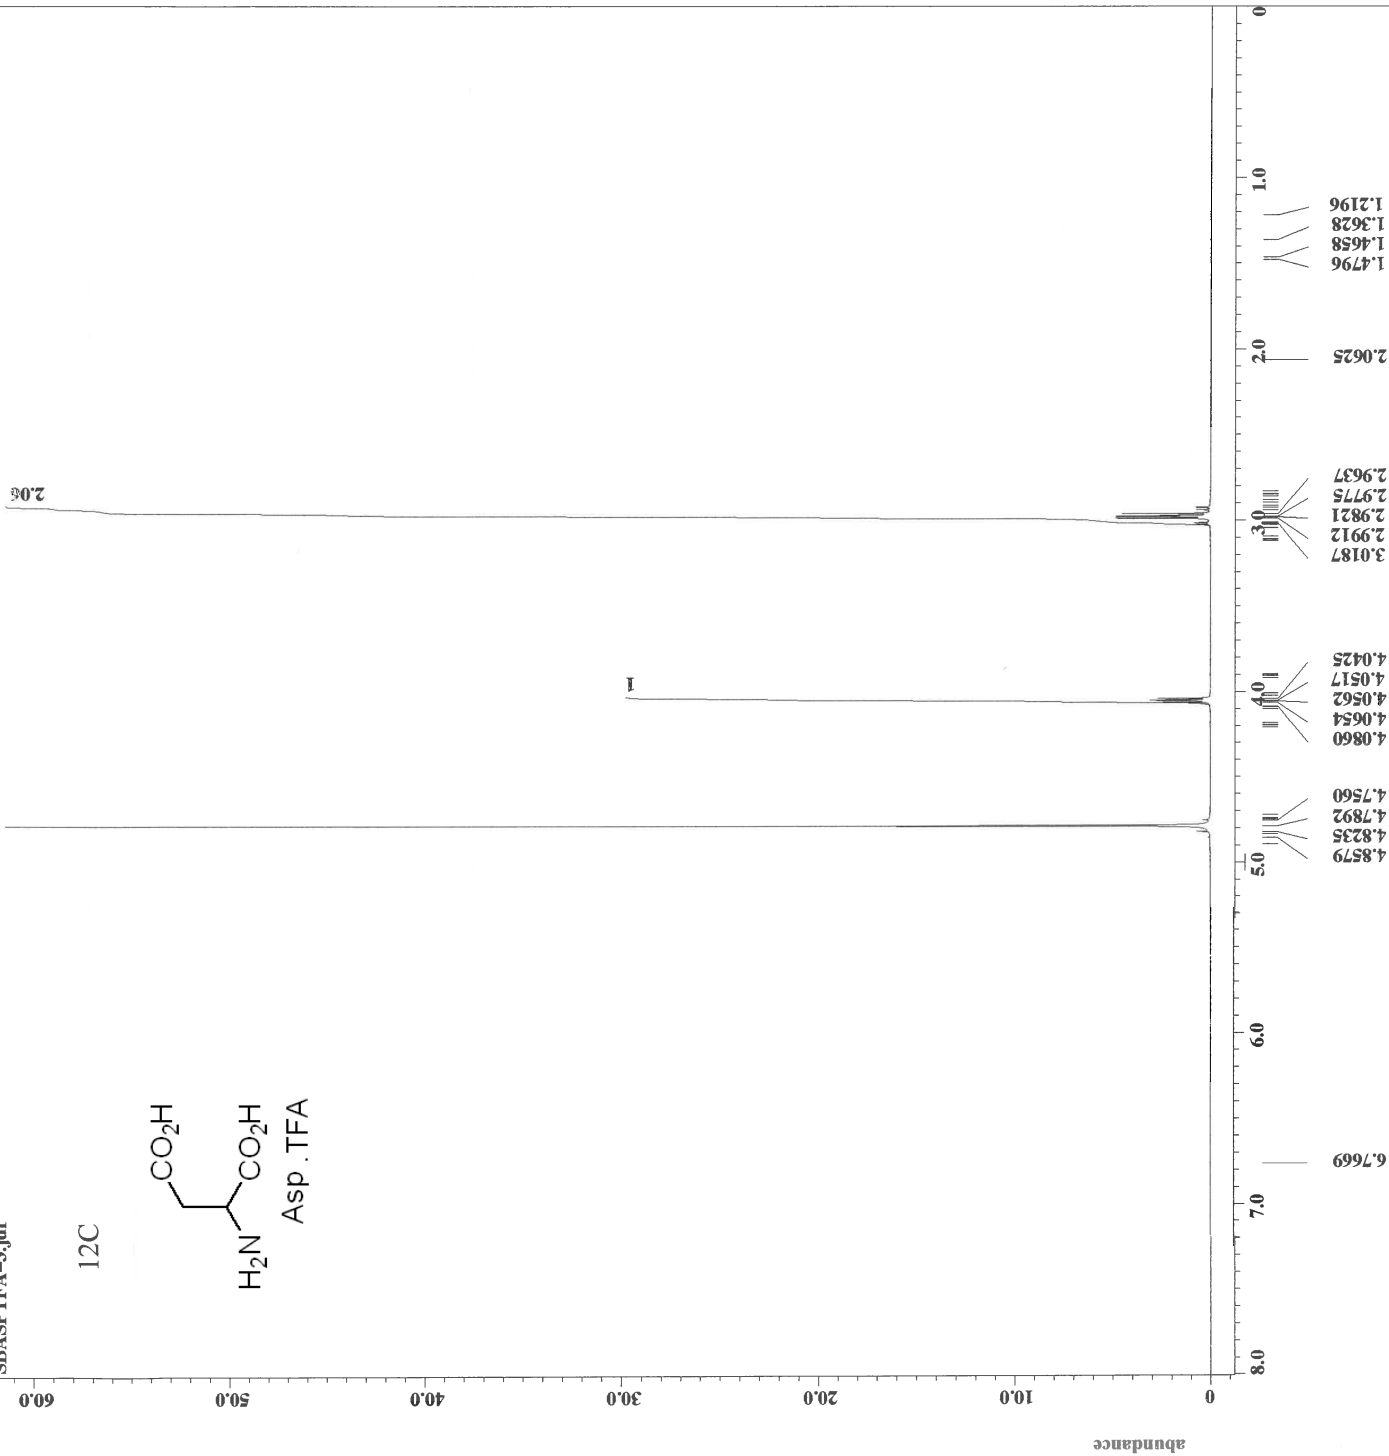

|                  |   |                           |
|------------------|---|---------------------------|
| Filename         | = | SRASP7FA-3.jdf            |
| Author           | = | delta                     |
| Experiment       | = | single_pulse.ex2          |
| Sample id        | = | S#381529                  |
| Solvent          | = | D2O                       |
| Creation time    | = | 12-SEP-2015 23:22:32      |
| Creation time    | = | 12-SEP-2015 10:41:13      |
| Current_time     | = | 12-SEP-2015 10:41:33      |
| Comment          | = | single_pulse              |
| Data format      | = | 1D COMPLEX                |
| Dim size         | = | 13107                     |
| Dim title        | = | 1H                        |
| Dim units        | = | [ppm]                     |
| Dimensions       | = | X                         |
| Site             | = | ECA 500                   |
| Spectrometer     | = | JNM-ECZ500                |
| Field strength   | = | 11.7473579 [T] (500[MHz]) |
| X acq duration   | = | 1.74587904[s]             |
| X domain         | = | 1H                        |
| X freq           | = | 500.15991521[MHz]         |
| X_offset         | = | 5.01[ppm]                 |
| X_points         | = | 16384                     |
| X_prescans       | = | 0                         |
| X resolution     | = | 0.57277737[Hz]            |
| X sweep          | = | 1H                        |
| Irr domain       | = | 9.38438438[kHz]           |
| Irr freq         | = | 500.15991521[MHz]         |
| Irr_offset       | = | 5.01[ppm]                 |
| Tri_domain       | = | 1H                        |
| Tri_freq         | = | 500.15991521[MHz]         |
| Tri_offset       | = | 5.01[ppm]                 |
| Clipped          | = | FALSE                     |
| Mod return       | = | 1                         |
| Scans            | = | 9                         |
| Total_scans      | = | 9                         |
| X_90_width       | = | 12.54[us]                 |
| X_acq_time       | = | 1.74587904[s]             |
| X_angle          | = | 45[deg]                   |
| X_atn            | = | 4[db]                     |
| X_pulse          | = | 6.27[us]                  |
| Irr mode         | = | Off                       |
| Tri_mode         | = | Off                       |
| Dante_presat     | = | FALSE                     |
| Initial_wait     | = | 1[s]                      |
| Recvr_gain       | = | 44                        |
| Relaxation_delay | = | 10[s]                     |
| Repetition_time  | = | 11.74587904[s]            |
| Temp get         | = | 21.3[degC]                |



12C

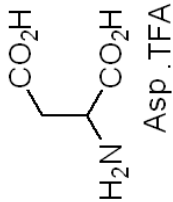

Filename = SBASPTFA-2.jdf  
Author = delta  
Experiment = single\_pulse\_dec  
Sample\_id = S#383772  
Solvent = D2O  
Creation\_time = 12-SEP-2015 23:35:29  
Revision\_time = 12-SEP-2015 10:51:56  
Current\_time = 12-SEP-2015 10:52:27  
Comment = single pulse decouple  
Data\_format = 1D COMPLEX  
Dim\_size = 26214  
Dim\_title = 13C  
Dim\_units = [ppm]  
Dimensions = X  
Site = ECA 500  
Spectrometer = JNM-ECA500  
Field\_strength = 11.7473579[T] (500[MH  
X\_acq\_duration = 0.83361792[s]  
X\_domain = 13C  
X\_freq = 125.76529768[MHz]  
X\_offset = 100[ppm]  
X\_points = 32768  
X\_prescans = 4  
X\_resolution = 1.19959034[Hz]  
X\_sweep = 39.3081761[kHz]  
X\_domain = 1H  
Irr\_freq = 500.15991521[MHz]  
Irr\_offset = 5.0[ppm]  
Clipped = FALSE  
Mod\_return = 10  
Scans = 690  
Total\_scans = 690  
X\_90\_width = 10.73[us]  
X\_acq\_time = 0.83361792[s]  
X\_angle = 30[deg]  
X\_atn = 9[db]  
X\_pulse = 3.57666667[us]  
Irr\_atn\_dec = 20[db]  
Irr\_atn\_noe = 20[db]  
Irr\_noise = WAITZ  
Decoupling = TRUE  
Initial\_wait = 1[s]  
Noe = TRUE  
Noe\_time = 0.2[s]  
Recvr\_gain = 50  
Relaxation\_delay = 0.2[s]  
Repetition\_time = 1.03361792[s]  
Temp\_get = 21.9[dc]

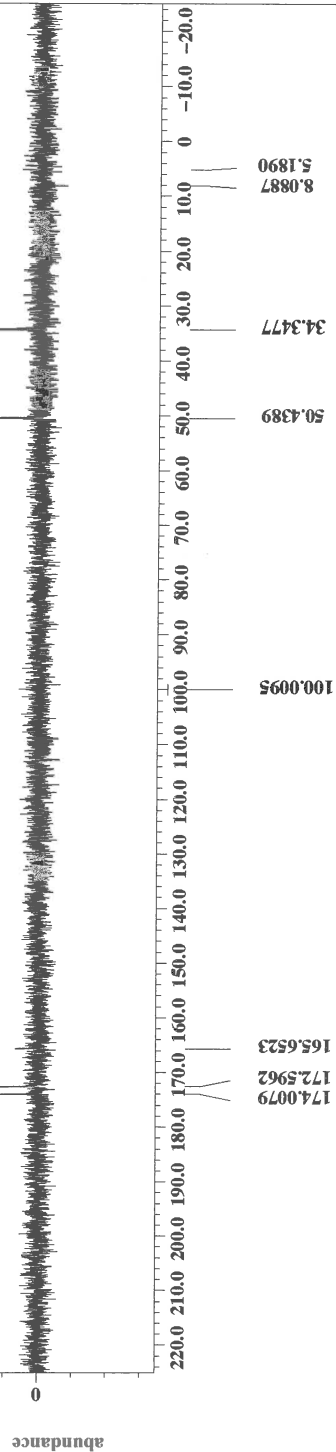

X : parts per Million : 13C

<sup>13</sup>C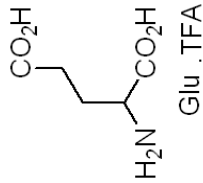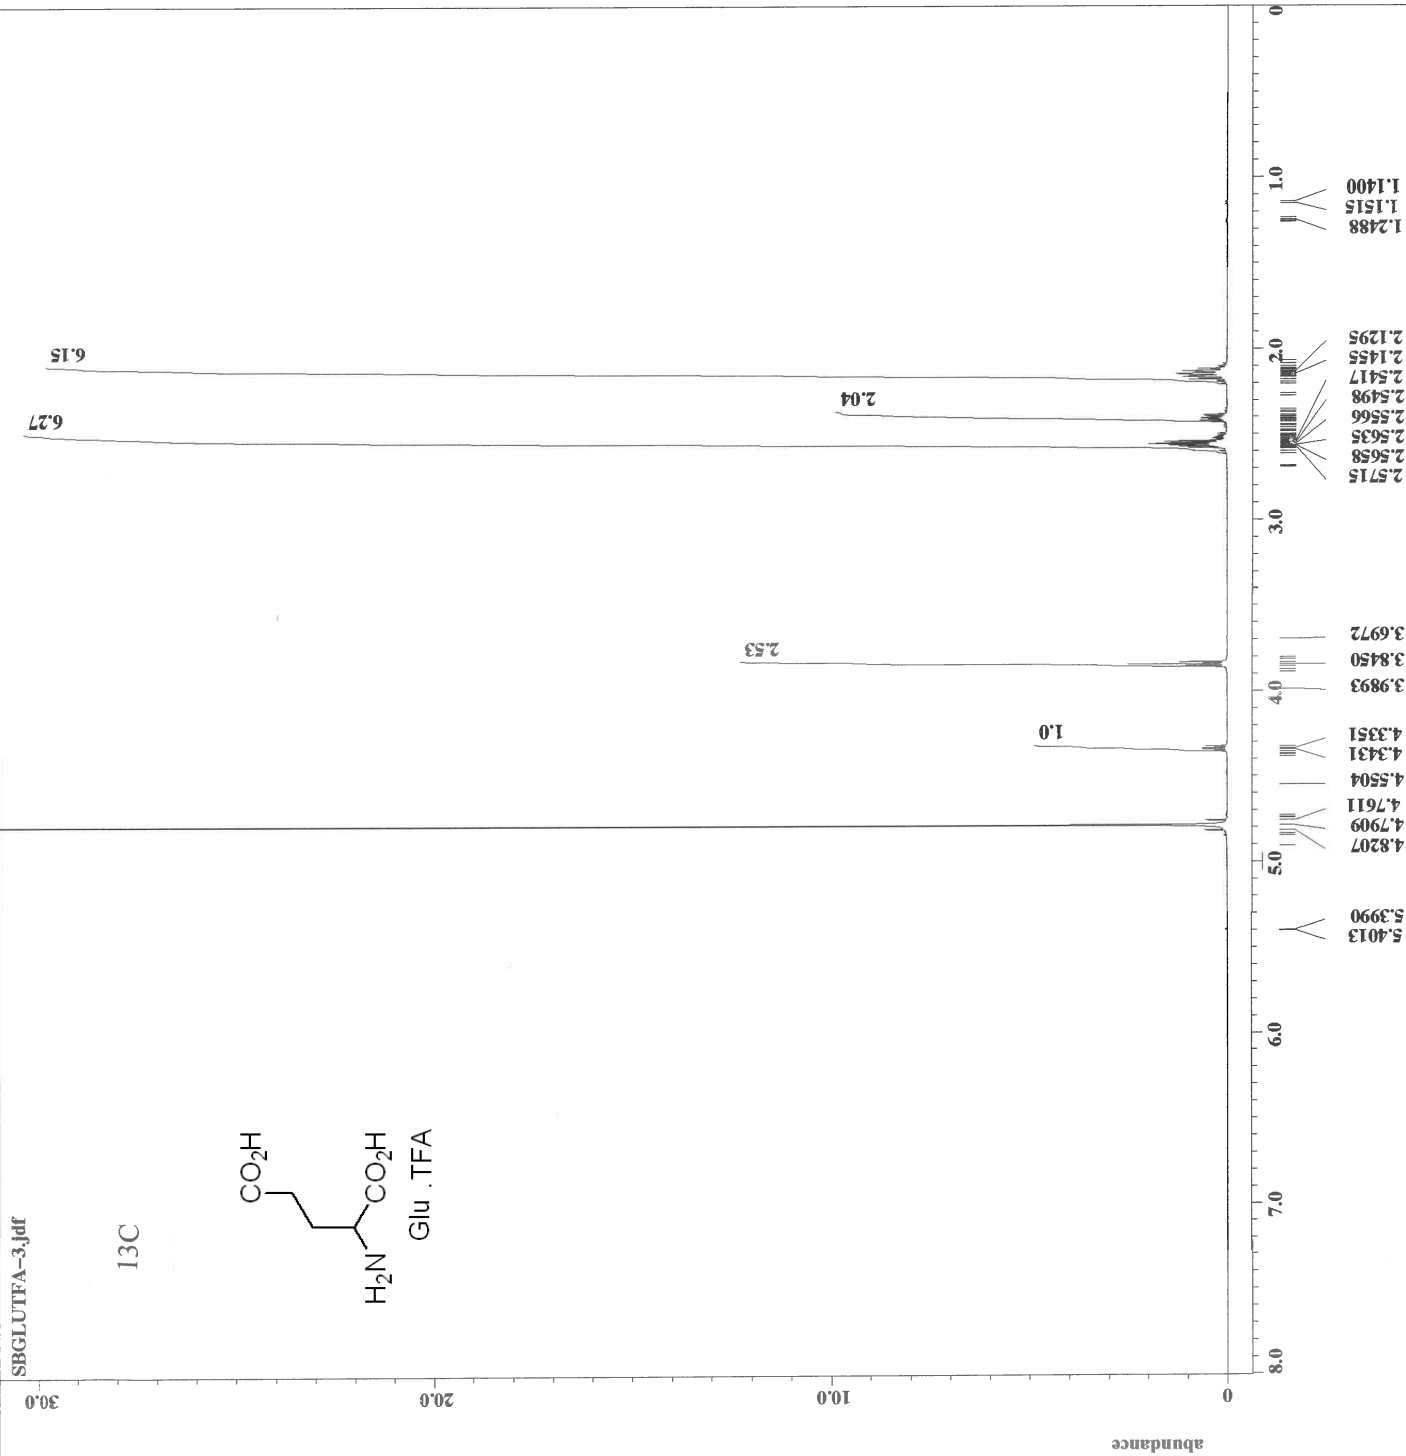

<sup>13</sup>C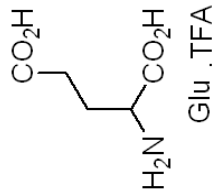

```

Filename = SBGLUTFAC-4.jdf
Author = delta
Experiment = single_pulse_dec
Sample_id = S#321121
Solvent = D2O
Creation_time = 20-SEP-2015 22:07:54
Revision_time = 20-SEP-2015 09:26:46
Current_time = 20-SEP-2015 09:27:30

Comment = single pulse decouple
Data_format = 1D COMPLEX
Dim_size = 26214
Dim_title = 13C
Dim_units = [ppm]
Dimensions = X
Site = ECA 500
Spectrometer = JNM-ECA500

Field_strength = 11.7473579[T] (500[MH
X_acq_duration = 0.83361792[s]
X_domain = 13C
X_freq = 125.76529768[MHz]
X_offset = 100[ppm]
X_points = 32768
X_prescans = 4
X_resolution = 1.19959034[Hz]
X_sweep = 39.3081761[kHz]
Irr_domain = 1H
Irr_freq = 500.15991521[MHz]
Irr_offset = 5.0[ppm]
Clipped = FALSE
Mod_return = 10
Scans = 1650
Total_scans = 1650

X_90_width = 10.73[us]
X_acq_time = 0.83361792[s]
X_angle = 30[deg]
X_atn = 9[db]
X_pulse = 3.57666667[us]
Irr_atn_dec = 20[db]
Irr_atn_noe = 20[db]
Irr_noise = WALYZ
Decoupling = TRUE
Initial_wait = 1[s]
Noe = TRUE
Noe_time = 0.2[s]
Recvr_gain = 50
Relaxation_delay = 0.2[s]
Repetition_time = 1.03361792[s]
Temp_get = 21.7[dc]

```

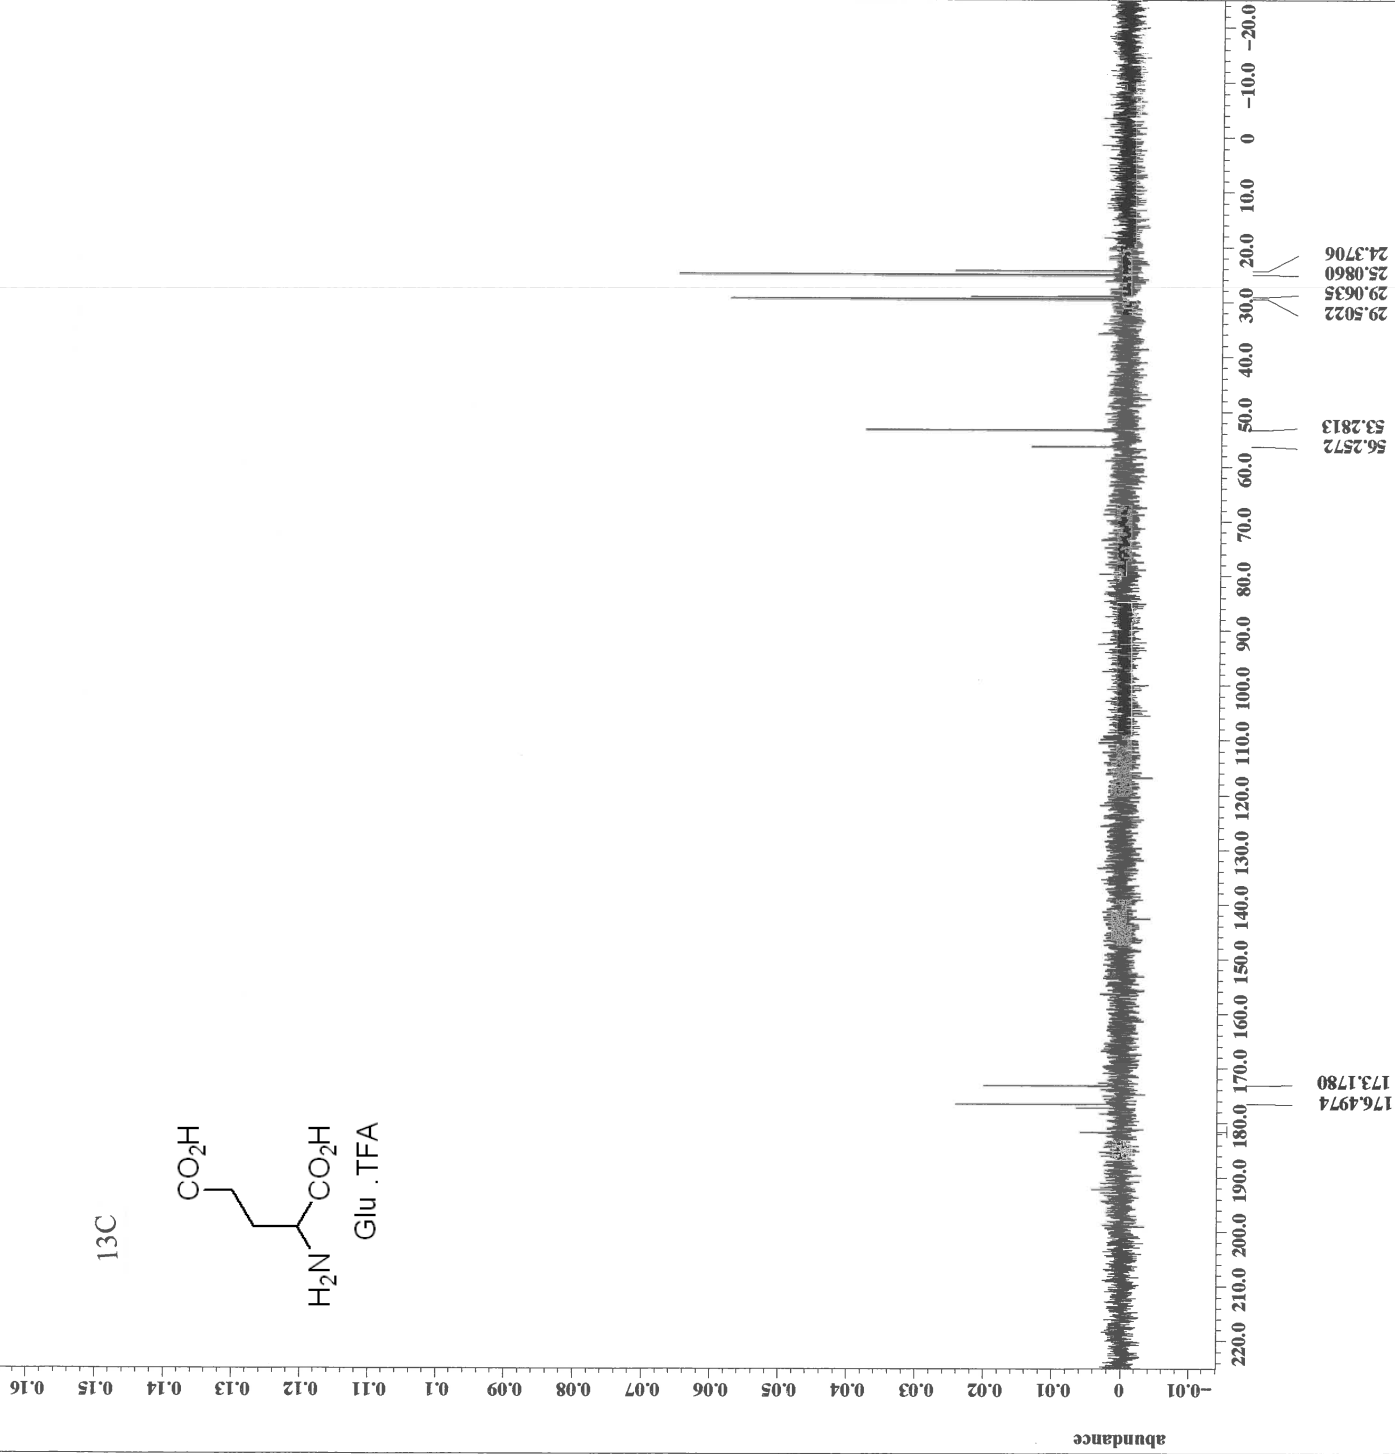X : parts per Million : <sup>13</sup>C

14C

3.08  
3.09

Filename = SBAATFA-3.jdf  
Author = delta  
Experiment = single\_pulse.ex2  
Sample\_id = #373771  
Solvent = D2O  
Creation\_time = 21-SEP-2015 23:10:09  
Revision\_time = 21-SEP-2015 10:28:55  
Current\_time = 21-SEP-2015 10:29:18  
Comment = single\_pulse  
Data\_format = 1D COMPLEX  
Dim\_size = 13107  
Dim\_title = 1H  
Dim\_units = [ppm]  
Dimensions = X  
Site = ECA 500  
Spectrometer = JNM-ECA500  
Field\_strength = 11.7473579[T] (500[MH  
X\_acq\_duration = 1.74587904[s]  
X\_domain = 1H  
X\_freq = 500.15991521[MHz]  
X\_offset = 5.0[ppm]  
X\_points = 16384  
X\_prescans = 0  
X\_resolution = 0.57277737[Hz]  
X\_sweep = 9.38438438[kHz]  
Irr\_domain = 1H  
Irr\_freq = 500.15991521[MHz]  
Irr\_offset = 5.0[ppm]  
Tri\_domain = 1H  
Tri\_freq = 500.15991521[MHz]  
Tri\_offset = 5.0[ppm]  
Clipped = FALSE  
Mod\_return = 1  
Scans = 10  
Total\_scans = 10  
X\_90\_width = 12.54[us]  
X\_acq\_time = 1.74587904[s]  
X\_angle = 45[deg]  
X\_atn = 4[db]  
X\_pulse = 6.27[us]  
Irr\_mode = Off  
Tri\_mode = Off  
Dante\_preset = FALSE  
Initial\_wait = 1[s]  
Recvr\_gain = 36  
Relaxation\_delay = 10[s]  
Repetition\_time = 11.74587904[s]  
Temp\_get = 23.3[dc]

0.92  
1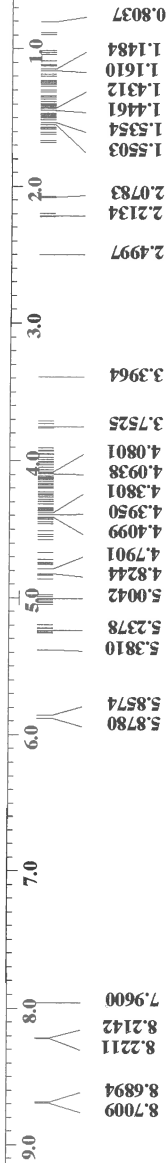

X : parts per Million : 1H

```

Filename      = SBAATFA-3.jdf
Author       = delta
Experiment   = single_pulse.ex2
Sample_id    = S#373771
Solvent      = D2O
Creation_time = 21-SEP-2015 23:10:09
Revision_time = 21-SEP-2015 10:28:55
Current_time  = 21-SEP-2015 10:29:50

Comment      = single_pulse
Data_format  = 1D COMPLEX
Dim_size     = 13107
Dim_title    = 1H
Dim_units    = [ppm]
Dimensions   = X
Site         = ECA 500
Spectrometer = JNM-ECA500

Field_strength
X_acq_duration = 11.7473579[T] (500[MH
X_domain       = 1H
X_freq         = 1.74587904[s]
X_offset       = 500.15991521[MHz]
X_points       = 5.0[ppm]
X_prescans     = 1638#
X_resolution   = 0
X_sweep        = 0.57277737[Hz]
X_freq         = 9.38438438[kHz]
Irr_domain     = 1H
Irr_freq       = 500.15991521[MHz]
Irr_offset     = 5.0[ppm]
Tri_domain     = 1H
Tri_freq       = 500.15991521[MHz]
Tri_offset     = 5.0[ppm]
Clipped        = FALSE
Mod_return     = 1
Scans          = 10
Total_scans    = 10

X_90_width     = 12.54[us]
X_acq_time     = 1.74587904[s]
X_angle        = 45[deg]
X_atn          = 4[dB]
X_pulse        = 6.27[us]
Irr_mode       = Off
Tri_mode       = Off
Dante_presat   = FALSE
Initial_wait   = 1[s]
Recvr_gain     = 36
Relaxation_delay = 10[s]
Repetition_time = 11.74587904[s]
Temp_get       = 23.3[dc]

```

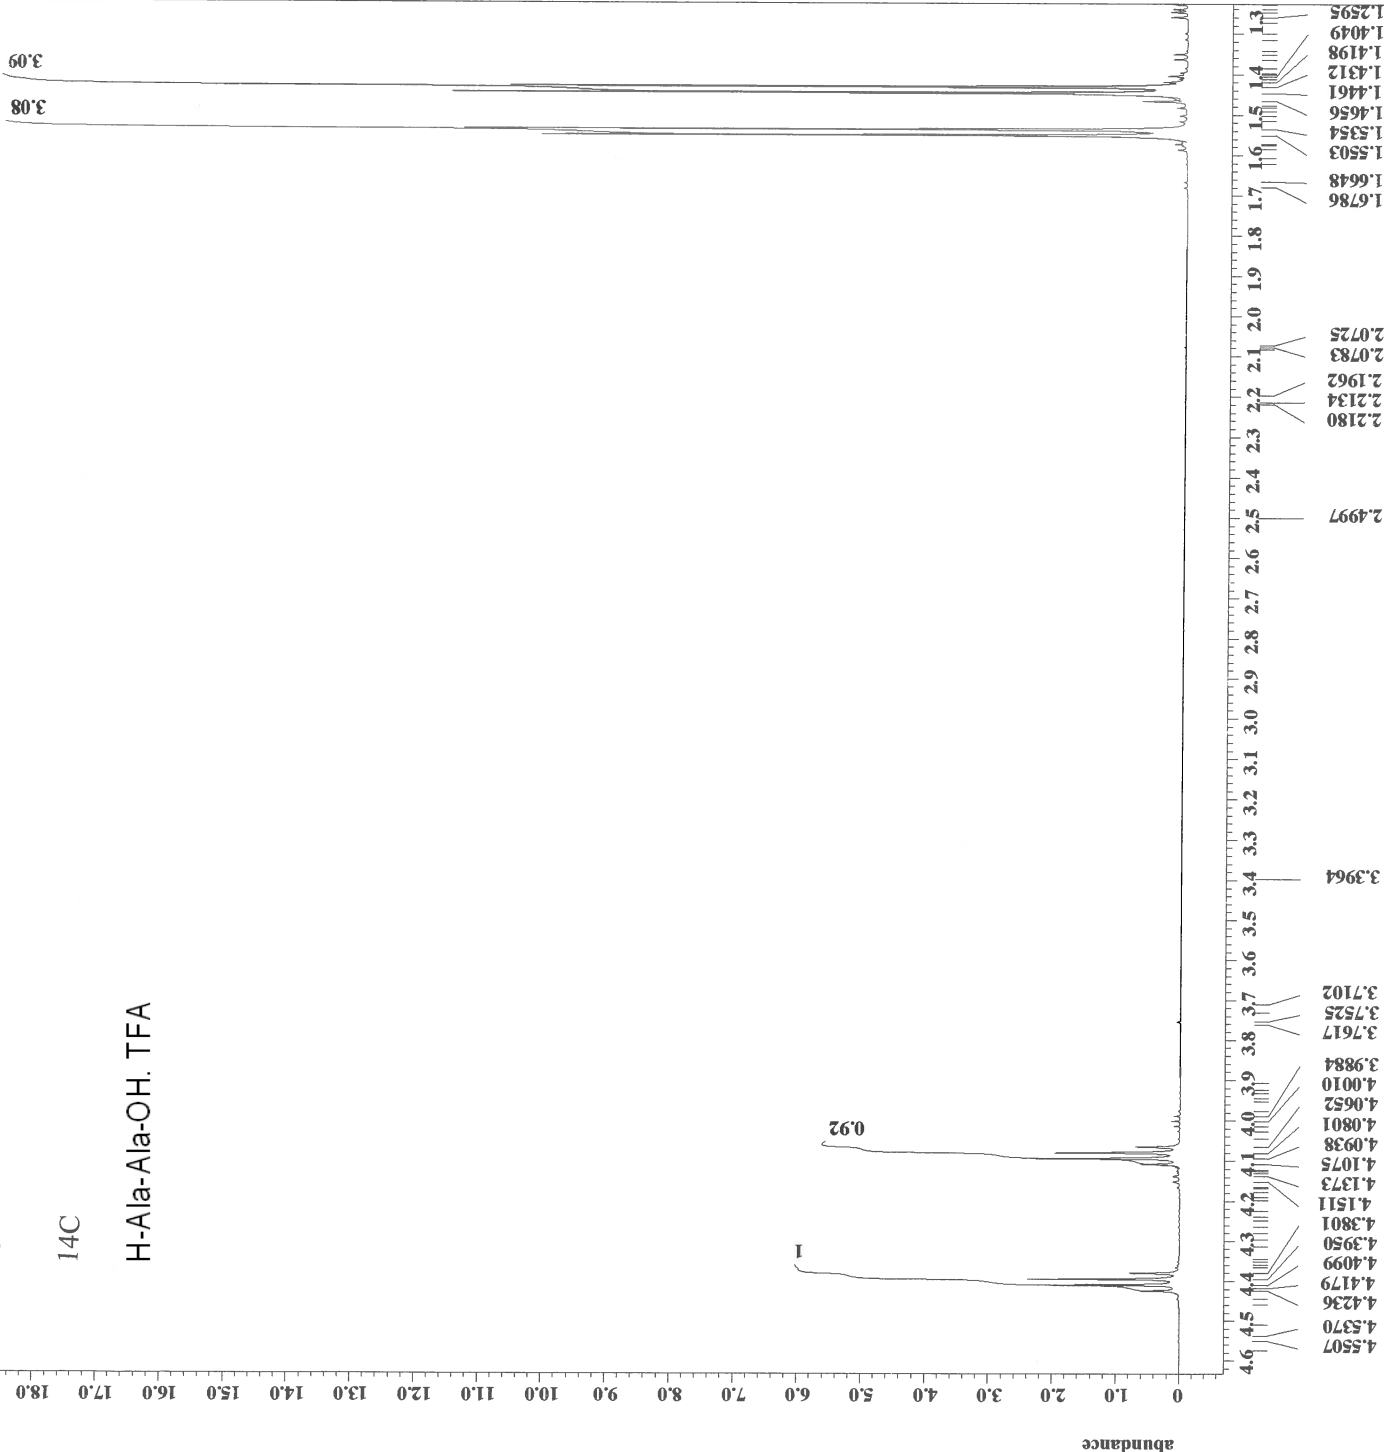

14C

H-Ala-Ala-OH. TFA

Filename = SBAATFAC-2.jdf  
Author = delta  
Experiment = single\_pulse\_dec  
Sample\_id = S#376071  
Solvent = D2O  
Creation\_time = 21-SEP-2015 23:20:23  
Revision\_time = 21-SEP-2015 10:36:39  
Current\_time = 21-SEP-2015 10:37:01  
Comment = single pulse decouple  
Data\_format = 1D COMPLEX  
Dim\_size = 26214  
Dim\_title = 13C  
Dim\_units = [ppm]  
Dimensions = X  
Site = ECA 500  
Spectrometer = JNM-ECA500  
Field\_strength = 11.7473579[T] (500[MH  
X\_acq\_duration = 0.83361792[s]  
X\_domain = 13C  
X\_freq = 125.76529768[MHz]  
X\_offset = 100[ppm]  
X\_points = 32768  
X\_prescans = 4  
X\_resolution = 1.19959034[Hz]  
X\_sweep = 39.3081761[kHz]  
Irr\_domain = 1H  
Irr\_freq = 500.15991521[MHz]  
Irr\_offset = 5.0[ppm]  
Clipped = FALSE  
Mod\_return = 10  
Scans = 540  
Total\_scans = 540  
X\_90\_width = 10.73[us]  
X\_acq\_time = 0.83361792[s]  
X\_angle = 30[deg]  
X\_atn = 9[dB]  
X\_pulse = 3.576666667[us]  
Irr\_atn\_dec = 20[dB]  
Irr\_atn\_noe = 20[dB]  
Irr\_noise = WALTZ  
Decoupling = TRUE  
Initial\_wait = 1[s]  
Noe\_time = 0.2[s]  
Noe\_time = 0.2[s]  
Recvr\_gain = 50  
Relaxation\_delay = 0.2[s]  
Repetition\_time = 1.03361792[s]  
Temp\_get = 23.7[dc]

1.4

1.3

1.2

1.1

1.0

0.9

0.8

0.7

0.6

0.5

0.4

0.3

0.2

0.1

0

abundance

220.0 210.0 200.0 190.0 180.0 170.0 160.0 150.0 140.0 130.0 120.0 110.0 100.0 90.0 80.0 70.0 60.0 50.0 40.0 30.0 20.0 10.0 0 -10.0 -20.0

175.9155  
170.316548.6552  
48.512116.1486  
15.6812

X : parts per Million : 13C

15C

H-Gly-Val-OH. TFA

6

30.0

20.0

10.0

0

abundance

```

Filename      = SBGLYVAL.TFA-3.fdf
Author        = delta
Experiment    = single_pulse.ex2
Sample_id     = S#701195
Solvent       = D2O
Creation_time = 22-SEP-2015 08:16:04
Revision_time = 21-SEP-2015 19:35:40
Current_time  = 21-SEP-2015 19:37:13

Comment
Data_format   = single_pulse
Dim_size      = 1D COMPLEX
Dim_title     = 13107
Dim_units     = 1H
Dimensions    = [ppm]
Site          = X
Spectrometer  = ECA 500
              = JNM-ECA500

Field_strength = 11.7473579[T] (500[MH
X_acq_duration = 1.74587904[s]
X_domain       = 1H
X_freq         = 500.15991521[MHz]
X_offset       = 5.0[ppm]
X_points       = 16384
X_prescans     = 0
X_resolution   = 0.57277737[Hz]
X_sweep        = 9.38438438[kHz]
Irr_domain     = 1H
Irr_freq       = 500.15991521[MHz]
Irr_offset     = 5.0[ppm]
Tri_domain     = 1H
Tri_freq       = 500.15991521[MHz]
Tri_offset     = 5.0[ppm]
Clipped        = FALSE
Mod_return     = 1
Scans          = 11
Total_scans    = 11

X_90_width     = 12.54[us]
X_acq_time     = 1.74587904[s]
X_angle        = 45[deg]
X_atn          = 4[dB]
X_pulse        = 6.27[us]
Irr_mode       = Off
Tri_mode       = Off
Dante_presat   = FALSE
Initial_wait   = 1[s]
Recvr_gain     = 38
Relaxation_delay = 10[s]
Repetition_time = 11.74587904[s]
Temp_get       = 22.6[degC]

```

0.95

1.93

0.96

4.0

3.0

2.0

1.0

4.4709  
4.3415  
4.3309  
4.1342  
4.1056  
3.9224  
3.8903  
3.8869  
3.8548  
3.7437  
3.6475

2.8448  
2.7772  
2.6650

2.3546  
2.3432  
2.2252  
2.2149  
2.2115  
2.0924  
2.0763

1.6824

1.4671  
1.3743  
1.3629  
1.3503

1.2312  
1.1602  
0.9701  
0.9563  
0.9483  
0.9346  
0.9243  
0.9186

X : parts per Million : 1H

15C

H-Gly-Val-OH. TFA

Filename = SBGLYVALTFAC-3.jdf  
Author = delta  
Experiment = single\_pulse\_dec  
Sample\_id = S#703778  
Solvent = D2O  
Creation\_time = 22-SEP-2015 08:27:39  
Revision\_time = 21-SEP-2015 19:43:48  
Current\_time = 21-SEP-2015 19:44:09  
Comment = single pulse decouple  
Data\_format = 1D COMPLEX  
Dim\_size = 26214  
Dim\_title = 13C  
Dim\_units = [ppm]  
Dimensions = X  
Site = ECA 500  
Spectrometer = JNM-ECA500  
Field\_strength = 11.7473579[T] (500[MH  
X\_acq\_duration = 0.83361792[s]  
X\_domain = 13C  
X\_freq = 125.76529768[MHz]  
X\_offset = 100[ppm]  
X\_points = 32768  
X\_prescans = 4  
X\_resolution = 1.19959034[Hz]  
X\_sweep = 39.3081761[kHz]  
X\_atn = 1H  
Irr\_freq = 500.15991521[MHz]  
Irr\_offset = 5.0[ppm]  
Clipped = FALSE  
Mod\_return = 10  
Scans = 580  
Total\_scans = 580  
X\_90\_width = 10.73[us]  
X\_acq\_time = 0.83361792[s]  
X\_angle = 30[deg]  
X\_atn = 9[db]  
X\_pulse = 3.57666667[us]  
Irr\_atn\_dec = 20[db]  
Irr\_atn\_noe = 20[db]  
Irr\_noise = WALIZ  
Decoupling = TRUE  
Initial\_wait = 1[s]  
Noe = TRUE  
Noe\_time = 0.2[s]  
Recvr\_gain = 50  
Relaxation\_delay = 0.2[s]  
Repetition\_time = 1.03361792[s]  
Temp\_get = 23[degC]

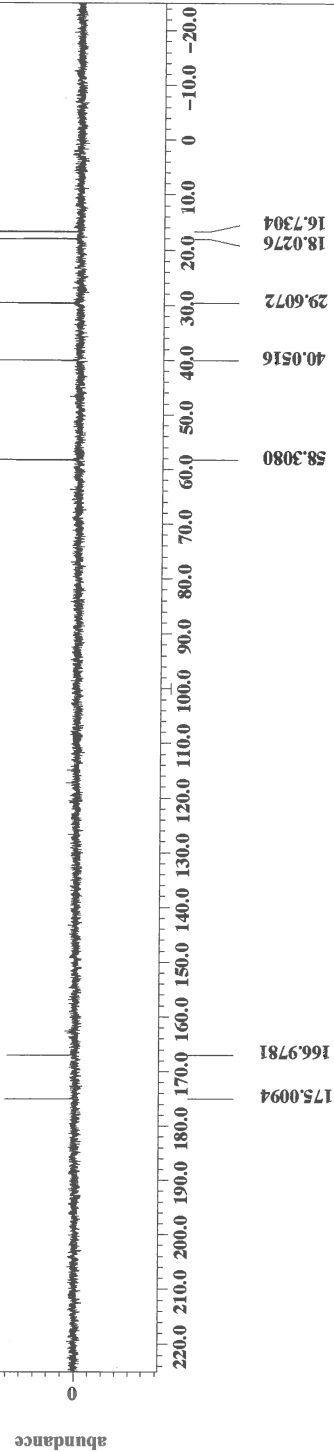



16C

## H-Gly-His-Lys-OH. TFA

Filename = SBTRIPEPTFA-3.jdf  
Author = delta  
Experiment = single\_pulse.ex2  
Sample id = S#522951  
Solvent = D2O  
Creation time = 23-SEP-2015 03:20:00  
Revision\_time = 22-SEP-2015 14:42:01  
Current\_time = 22-SEP-2015 14:43:02  
Comment = single\_pulse  
Data format = 1D COMPLEX  
Dim\_size = 13107  
Dim\_title = 1H  
Dim\_units = [ppm]  
Dimensions = X  
Site = ECA 500  
Spectrometer = JNM-ECA500  
Field\_strength = 11.7473579[T] (500[MH  
X\_acq\_duration = 1.74587904[s]  
X\_domain = 1H  
X\_freq = 500.15991521[MHz]  
X\_offset = 5.0[ppm]  
X\_points = 16384  
X\_prescans = 0  
X\_resolution = 0.57277737[Hz]  
X\_sweep = 9.38438438[kHz]  
Irr\_domain = 1H  
Irr\_freq = 500.15991521[MHz]  
Irr\_offset = 5.0[ppm]  
Tri\_domain = 1H  
Tri\_freq = 500.15991521[MHz]  
Tri\_offset = 5.0[ppm]  
Clipped = FALSE  
Mod\_return = 1  
Scans = 16  
Total\_scans = 16  
X\_90\_width = 12.54[us]  
X\_acq\_time = 1.74587904[s]  
X\_angle = 45[deg]  
X\_atn = 4[db]  
X\_pulse = 6.27[us]  
Irr\_mode = Off  
Tri\_mode = Off  
Dante\_presat = FALSE  
Initial\_wait = 1[s]  
Recvr\_gain = 40  
Relaxation\_delay = 10[s]  
Repetition\_time = 11.74587904[s]  
Temp\_get = 22.5[DC]

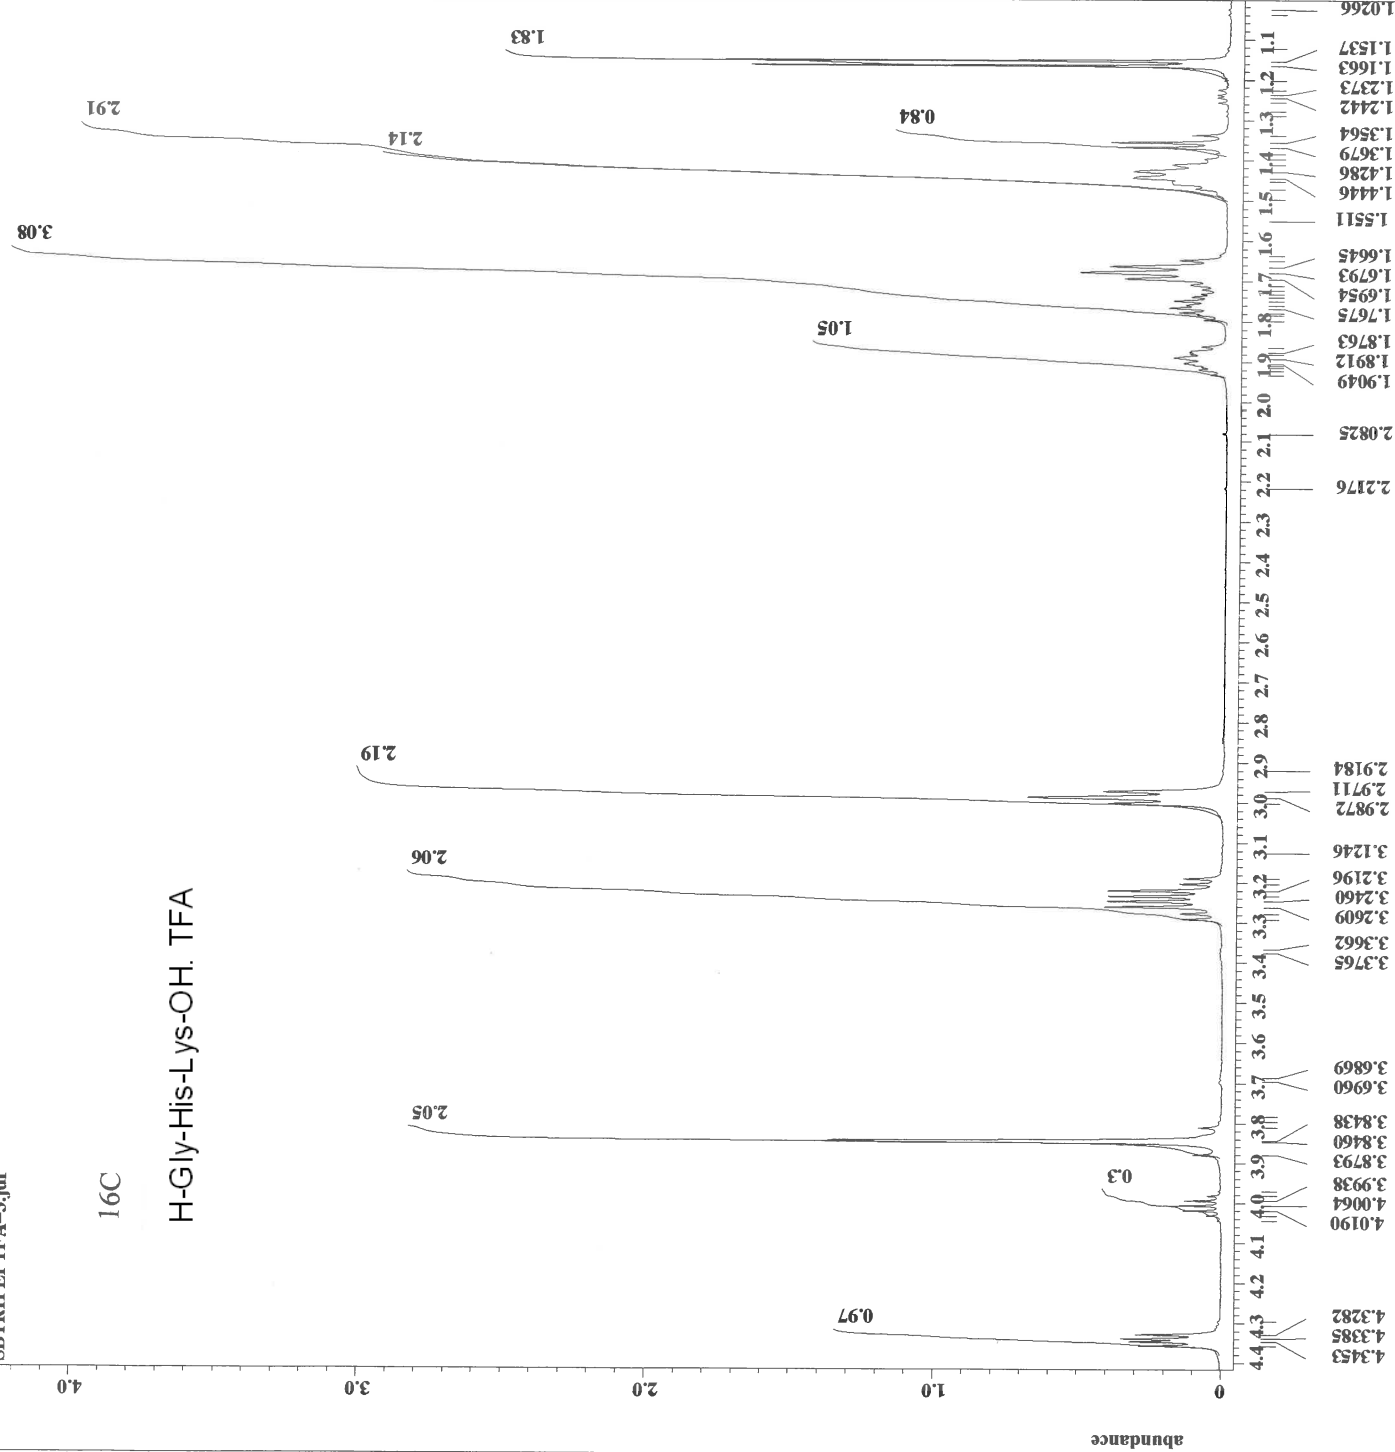

16 C

H-Gly-His-Lys-OH. TFA

Filename = SBTRIPEPTFAC-2.jdf  
 Author = delta  
 Experiment = single\_pulse\_dec  
 Sample\_id = S#526053  
 Solvent = D2O  
 Creation\_time = 23-SEP-2015 03:39:32  
 Revision\_time = 22-SEP-2015 14:55:42  
 Current\_time = 22-SEP-2015 14:56:50  
 Comment = single pulse decouple  
 Data\_format = 1D COMPLEX  
 Dim\_size = 26214  
 Dim\_title = 13C  
 Dim\_units = [ppm]  
 Dimensions = X  
 Site = ECA 500  
 Spectrometer = JNM-ECA500  
 Field\_strength = 11.7473579[T] (500[MH  
 X\_acq\_duration = 0.83361792[s]  
 X\_domain = 13C  
 X\_freq = 125.76529768[MHz]  
 X\_offset = 100[ppm]  
 X\_points = 32768  
 X\_prescans = 4  
 X\_resolution = 1.19959034[Hz]  
 X\_sweep = 39.3081761[MHz]  
 Irr\_domain = 1H  
 Irr\_freq = 500.15991521[MHz]  
 Irr\_offset = 5.0[ppm]  
 Clipped = FALSE  
 Mod\_return = 10  
 Scans = 1070  
 Total\_scans = 1070  
 X\_90\_width = 10.73[us]  
 X\_acq\_time = 0.83361792[s]  
 X\_angle = 30[deg]  
 X\_atn = 9[db]  
 X\_pulse = 3.57666667[us]  
 Irr\_atn\_dec = 20[db]  
 Irr\_atn\_noe = 20[db]  
 Irr\_noise = WALTZ  
 Decoupling = TRUE  
 Initial\_wait = 1[s]  
 Noe = TRUE  
 Noe\_time = 0.2[s]  
 Recvr\_gain = 50  
 Relaxation\_delay = 0.2[s]  
 Repetition\_time = 1.03361792[s]  
 Temp\_get = 22.9[dc]

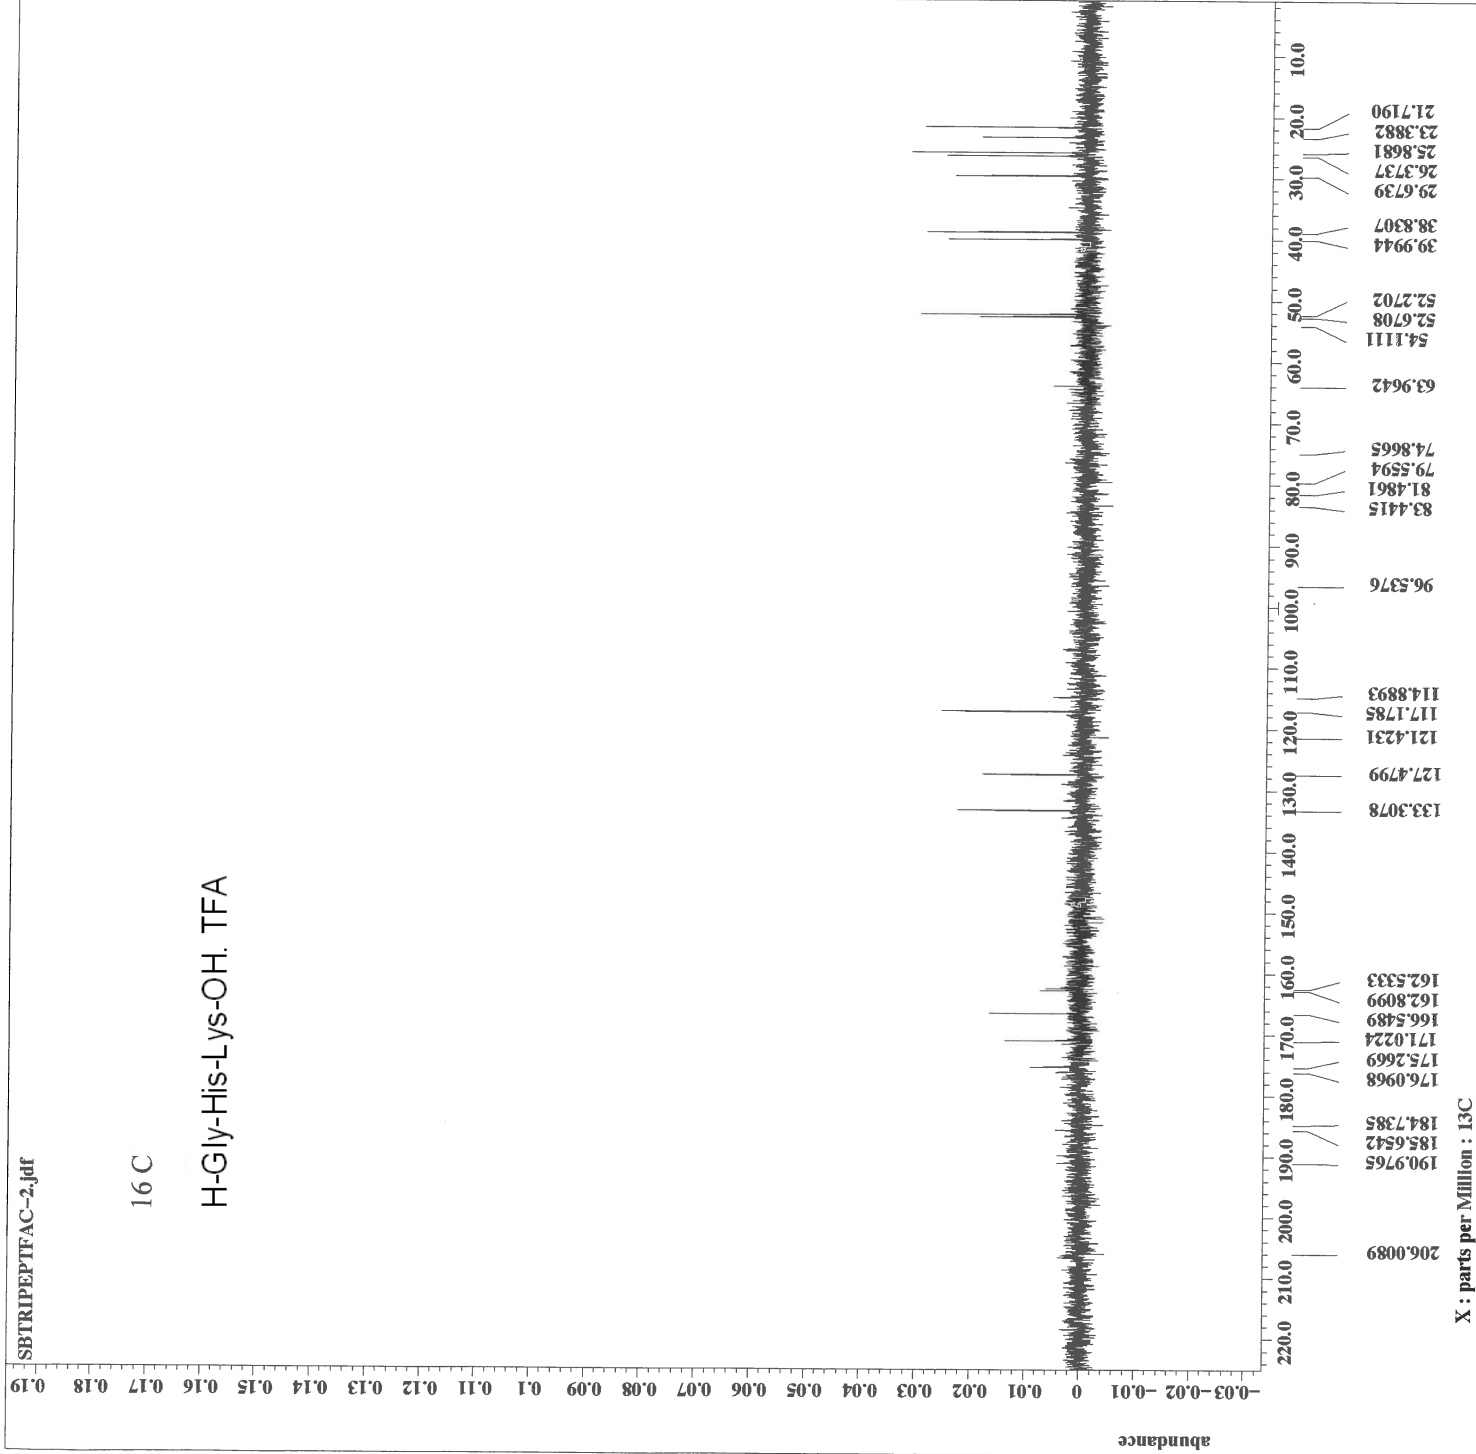

Supplement: c5ra21279k1.pdf [file c5ra21279k1.pdf]
